# Supplementary material for: Mouse Ataxin-2 Expansion Downregulates CamKII and other Calcium Signaling Factors, Impairing Granule – Purkinje Neuron Synaptic Strength
Source: Preprints.org preprint supplement (doi:10.20944/preprints202008.0470.v1), 2020-08-21
Supplement: Supplementary file 1 [file ArsovicAuburger_SuppTableS1_ClariomD_Transcriptome_Unfiltered.xlsx]

## Sheet: KINcerebellum10wk-Unfiltered
ID	Now_KIN_CB Avg (log2)	Now_WT_CB Avg (log2)	Fold Change	P-val	FDR P-val	Gene Symbol	Description	Group
TC0100002762.mm.1	8.86	11.21	-5.08	0.0217	0.3573	Kcnj13	potassium inwardly-rectifying channel, subfamily J, member 13	Coding
TC0100002562.mm.1	9.05	10.59	-2.91	7.42e-07	0.0245	Igfbp5	insulin-like growth factor binding protein 5	Multiple_Complex
TC0500001876.mm.1	8.15	9.62	-2.78	0.0387	0.396	Kl	klotho	Coding
TC1600001029.mm.1	8.08	9.54	-2.77	0.0182	0.3461	Clic6	chloride intracellular channel 6	Coding
TC1300001452.mm.1	5.16	6.61	-2.73	0.0014	0.1992	Prl2c3; Prl2c4	prolactin family 2, subfamily c, member 3; prolactin family 2, subfamily c, member 4	Coding
TC1300001453.mm.1	4.95	6.4	-2.72	0.0041	0.257	Prl2c2	prolactin family 2, subfamily c, member 2	Coding
TC0100001498.mm.1	6.27	7.71	-2.72	0.0402	0.3992	F5	coagulation factor V; Synthetic construct Mus musculus clone IMAGE:100069458, MGC:199360 coagulation factor V (F5) mRNA, encodes complete protein.	Coding
TC1100001767.mm.1	6.96	8.18	-2.33	0.0146	0.3306	Ace	angiotensin I converting enzyme (peptidyl-dipeptidase A) 1	Multiple_Complex
TC0900000535.mm.1	6.91	8.07	-2.24	6.88e-05	0.1165	Scn4b	sodium channel, type IV, beta	Coding
TC1300001762.mm.1	6.78	7.91	-2.2	0.0004	0.1494	Serpinb1a	serine (or cysteine) peptidase inhibitor, clade B, member 1a	Coding
TC0700000777.mm.1	6.38	7.46	-2.11	1.77e-05	0.0893	Klk6	kallikrein related-peptidase 6	Coding
TC0700001070.mm.1	7.75	8.8	-2.07	0.0005	0.1583	Fam174b	family with sequence similarity 174, member B	Coding
TC1100003659.mm.1	7.89	8.92	-2.03	6.71e-06	0.0893	Plxdc1	plexin domain containing 1	Multiple_Complex
TC0900000720.mm.1	10.4	11.4	-2.01	1.86e-05	0.0893	Sema7a	sema domain, immunoglobulin domain (Ig), and GPI membrane anchor, (semaphorin) 7A	Multiple_Complex
TC0400002021.mm.1	9.27	10.25	-1.97	4.36e-05	0.1165	Icmt	isoprenylcysteine carboxyl methyltransferase	Multiple_Complex
TC0X00002084.mm.1	10.35	11.3	-1.94	1.48e-05	0.0893	Tmem255a	transmembrane protein 255A	Multiple_Complex
TC0X00000414.mm.1	5.21	6.17	-1.94	0.0017	0.2083	Prr32	proline rich 32	Coding
TC0200002426.mm.1	5.94	6.9	-1.94	0.0133	0.3242	Lbp	lipopolysaccharide binding protein	Multiple_Complex
TC0100003531.mm.1	7.96	8.89	-1.92	0.0001	0.1265	Pcp4l1	Purkinje cell protein 4-like 1	Coding
TC0900002898.mm.1	9.12	10.05	-1.91	0.0004	0.1494	Clstn2	calsyntenin 2	Multiple_Complex
TC0300001322.mm.1	9.24	10.11	-1.83	0.0205	0.3538	Etnppl	ethanolamine phosphate phospholyase	Multiple_Complex
TC0500001914.mm.1	5.43	6.3	-1.83	0.0469	0.4084	Steap1	six transmembrane epithelial antigen of the prostate 1	Coding
TC0900000871.mm.1	5.81	6.65	-1.79	0.0055	0.2664	Car12	carbonic anyhydrase 12	Multiple_Complex
TC0400001574.mm.1	5.66	6.49	-1.78	0.0002	0.1265	Tmem200b	transmembrane protein 200B	Coding
TC1700002308.mm.1	7.37	8.16	-1.74	3.92e-05	0.1165	Stap2	signal transducing adaptor family member 2	Multiple_Complex
TC0300000811.mm.1	4.91	5.71	-1.74	0.0019	0.2172	S100a8	S100 calcium binding protein A8 (calgranulin A)	Coding
TC0X00001447.mm.1	6.45	7.24	-1.73	0.0268	0.3726	Htr2c	5-hydroxytryptamine (serotonin) receptor 2C	Multiple_Complex
TC1000003166.mm.1	6.87	7.64	-1.7	0.0016	0.2066	Gdf11	growth differentiation factor 11	Multiple_Complex
TC0300000864.mm.1	6.37	7.13	-1.69	0.0012	0.1931	Rorc	RAR-related orphan receptor gamma	Multiple_Complex
TC1900000448.mm.1	6.26	7.02	-1.69	0.0057	0.2689	Il33	interleukin 33	Multiple_Complex
TC0600000926.mm.1	6.17	6.92	-1.68	0.0292	0.3772	Slc4a5	solute carrier family 4, sodium bicarbonate cotransporter, member 5	Multiple_Complex
TC0100001381.mm.1	8.24	8.96	-1.65	0.0005	0.1503	Rgs16	regulator of G-protein signaling 16	Coding
TC1500000235.mm.1	11.79	12.5	-1.64	4.1e-05	0.1165	Laptm4b	lysosomal-associated protein transmembrane 4B	Multiple_Complex
TC1800001510.mm.1	10.79	11.51	-1.64	4.92e-05	0.1165	Cep76	centrosomal protein 76	Multiple_Complex
TC0100000985.mm.1	8.2	8.91	-1.64	0.0001	0.1265	Cntnap5b	contactin associated protein-like 5B; Synthetic construct Mus musculus clone IMAGE:100068083, MGC:195700 contactin associated protein-like 5B (Cntnap5b) mRNA, encodes complete protein.	Coding
TC0300000096.mm.1	12.56	13.28	-1.64	0.0013	0.1945	Car2	carbonic anhydrase 2	Coding
TC0800003027.mm.1	7.71	8.4	-1.62	0.0008	0.1768	Kcng4	potassium voltage-gated channel, subfamily G, member 4	Coding
TC1400001659.mm.1	8.21	8.9	-1.61	0.0001	0.1265	Prkcd	protein kinase C, delta	Multiple_Complex
TC1800000980.mm.1	10.67	11.36	-1.61	0.0002	0.1265	Abhd3	abhydrolase domain containing 3	Coding
TC1900001025.mm.1	7.8	8.49	-1.61	0.0002	0.1265	Plcb3	phospholipase C, beta 3	Coding
TC1400001661.mm.1	8.15	8.84	-1.61	0.0024	0.2306	Itih3	inter-alpha trypsin inhibitor, heavy chain 3	Multiple_Complex
TC1300002689.mm.1	6.28	6.96	-1.61	0.0291	0.3769	Gpx8	glutathione peroxidase 8 (putative)	Coding
TC0600000588.mm.1	9.21	9.89	-1.6	0.0029	0.237	Npy	neuropeptide Y	Coding
TC0900001599.mm.1	11.47	12.15	-1.6	0.0091	0.3006	Mobp	myelin-associated oligodendrocytic basic protein	Coding
TC0500000992.mm.1	10.5	11.17	-1.59	0.0005	0.1513	Cds1	CDP-diacylglycerol synthase 1	Multiple_Complex
TC1500001675.mm.1	9.84	10.5	-1.58	0.0003	0.1423	Fam135b	family with sequence similarity 135, member B	Multiple_Complex
TC1500001019.mm.1	7.26	7.93	-1.58	0.0009	0.1791	Aqp6	aquaporin 6	Coding
TC0200000661.mm.1	3.42	4.08	-1.58	0.0027	0.2315	Olfr342	olfactory receptor 342	Coding
TC0400002174.mm.1	16.8	17.45	-1.57	8.96e-05	0.1182	Car8	carbonic anhydrase 8	Multiple_Complex
TC1000003106.mm.1	12.85	13.51	-1.57	0.0001	0.1265	Kif5a	kinesin family member 5A	Coding
TC0900003323.mm.1	6.08	6.73	-1.57	0.0295	0.3777	C1qtnf5; Mfrp	C1q and tumor necrosis factor related protein 5; membrane-type frizzled-related protein	Coding
TC0900001232.mm.1	8.43	9.08	-1.57	0.0431	0.4043	Rbp1	retinol binding protein 1, cellular	Coding
TC1800000620.mm.1	9.46	10.1	-1.56	0.0003	0.1391	Camk2a	calcium/calmodulin-dependent protein kinase II alpha	Multiple_Complex
TC0600003460.mm.1	7.82	8.46	-1.56	0.0004	0.1494	Tmtc1	transmembrane and tetratricopeptide repeat containing 1	Multiple_Complex
TC0200001273.mm.1	3.29	3.93	-1.56	0.0009	0.1815	Olfr1093	olfactory receptor 1093	Coding
TC1200002296.mm.1	10.02	10.65	-1.55	0.0002	0.1265	Clmn	calmin; calmin (Clmn), transcript variant 1, mRNA.	Multiple_Complex
TC0600000250.mm.1	9.95	10.58	-1.55	0.0002	0.1265	Strip2	striatin interacting protein 2	Multiple_Complex
TC0200001780.mm.1	7.76	8.39	-1.55	0.0004	0.1494	Itpka	inositol 1,4,5-trisphosphate 3-kinase A	Coding
TC0700003846.mm.1	5.04	5.67	-1.55	0.019	0.3481	Folr1	folate receptor 1 (adult)	Multiple_Complex
TC1600001764.mm.1	4.54	5.17	-1.55	0.0202	0.3527	Col8a1	collagen, type VIII, alpha 1	Multiple_Complex
TC1400002632.mm.1	10.42	11.04	-1.54	7.5e-05	0.1165	Kctd12; Mir5130	potassium channel tetramerisation domain containing 12; microRNA 5130; Synthetic construct Mus musculus clone IMAGE:100064065, MGC:193436 potassium channel tetramerisation domain containing 12 (Kctd12) mRNA, encodes complete protein.	Multiple_Complex
TC0700001991.mm.1	14.54	15.16	-1.54	8.14e-05	0.1165	Inpp5a	inositol polyphosphate-5-phosphatase A	Multiple_Complex
TC1700001738.mm.1	12.49	13.11	-1.54	8.48e-05	0.1165	Grm4	glutamate receptor, metabotropic 4	Multiple_Complex
TC1000000853.mm.1	8.28	8.91	-1.54	0.0011	0.1906	Plk5	polo-like kinase 5	Multiple_Complex
TC0100003099.mm.1	9.01	9.63	-1.54	0.0173	0.3412	Prelp	proline arginine-rich end leucine-rich repeat	Multiple_Complex
TC0X00001374.mm.1	4.05	4.67	-1.54	0.0357	0.3901	Cldn2	claudin 2	Coding
TC1400001567.mm.1	11.25	11.85	-1.52	0.0007	0.1689	Kcnma1	potassium large conductance calcium-activated channel, subfamily M, alpha member 1	Multiple_Complex
TC0200000319.mm.1	6.7	7.29	-1.51	9.3e-05	0.1192	Etl4	enhancer trap locus 4	Multiple_Complex
TC1200002506.mm.1	6.83	7.43	-1.51	0.0004	0.1428	Dnah11	dynein, axonemal, heavy chain 11	Multiple_Complex
TC0600001368.mm.1	9.74	10.33	-1.51	0.0007	0.1673	Tuba8	tubulin, alpha 8	Coding
TC0500002355.mm.1	11.36	11.96	-1.51	0.0019	0.2192	Kcnip4	Kv channel interacting protein 4	Multiple_Complex
TC1700000036.mm.1	10.67	11.26	-1.5	6.09e-05	0.1165	Zdhhc14	zinc finger, DHHC domain containing 14	Multiple_Complex
TC1100001010.mm.1	9.02	9.61	-1.5	0.0002	0.1265	Atp2a3	ATPase, Ca++ transporting, ubiquitous	Multiple_Complex
TC0X00000929.mm.1	6.75	7.33	-1.5	0.0007	0.1683	Ar	androgen receptor; Synthetic construct Mus musculus clone IMAGE:100016477, MGC:184490 androgen receptor (Ar) mRNA, encodes complete protein.	Multiple_Complex
TC1500001002.mm.1	9.38	9.97	-1.5	0.0053	0.2643	Tuba1c	tubulin, alpha 1C	Coding
TC0100001671.mm.1	12.66	13.24	-1.5	0.0189	0.3478	Zbtb18	zinc finger and BTB domain containing 18	Coding
TC0600003548.mm.1	2.96	3.55	-1.5	0.0206	0.3552	Igkv4-90	immunoglobulin kappa chain variable 4-90	Coding
TC0300001958.mm.1	11.04	11.62	-1.49	0.0001	0.1265	Setd7	SET domain containing (lysine methyltransferase) 7	Multiple_Complex
TC1700002573.mm.1	13.57	14.15	-1.49	0.0002	0.1265	Atl2	atlastin GTPase 2; atlastin GTPase 2 (Atl2), transcript variant 2, mRNA.	Coding
TC1100003529.mm.1	7.78	8.36	-1.49	0.0002	0.1265	Hlf	hepatic leukemia factor	Multiple_Complex
TC1900000714.mm.1	12.98	13.56	-1.49	0.0002	0.1265	Ina	internexin neuronal intermediate filament protein, alpha	Coding
TC0300001858.mm.1	10.77	11.34	-1.49	0.0004	0.1428	Trpc3	transient receptor potential cation channel, subfamily C, member 3	Multiple_Complex
TC0900001635.mm.1	12.35	12.92	-1.48	0.0002	0.1265	Snrk	SNF related kinase	Multiple_Complex
TC1900001098.mm.1	9.09	9.65	-1.48	0.0004	0.1494	Dagla	diacylglycerol lipase, alpha; Synthetic construct Mus musculus clone IMAGE:100068101, MGC:195718 diacylglycerol lipase, alpha (Dagla) mRNA, encodes complete protein.	Multiple_Complex
TC0400001506.mm.1	10.15	10.72	-1.48	0.0008	0.1768	Trim62	tripartite motif-containing 62	Multiple_Complex
TC1000003227.mm.1	5.98	6.54	-1.48	0.0057	0.2691	Rdh5	retinol dehydrogenase 5	Multiple_Complex
TC0600002980.mm.1	6.36	6.93	-1.48	0.0093	0.3011	Tmem72	transmembrane protein 72	Coding
TC0100003037.mm.1	6.34	6.91	-1.48	0.0103	0.3077	Cd55	CD55 molecule, decay accelerating factor for complement; CD55 antigen	Multiple_Complex
TC1000001216.mm.1	10.34	10.9	-1.47	0.0002	0.1265	Kitl	kit ligand	Coding
TC1100002120.mm.1	7.18	7.73	-1.47	0.0006	0.1591	Cabp7	calcium binding protein 7	Coding
TC1100002995.mm.1	12.76	13.31	-1.47	0.0011	0.1899	Shisa6	shisa family member 6; shisa homolog 6 (Xenopus laevis)	Multiple_Complex
TC1700002240.mm.1	8.7	9.25	-1.47	0.0021	0.2215	Daam2	dishevelled associated activator of morphogenesis 2	Coding
TC0500003116.mm.1	6.31	6.87	-1.47	0.0029	0.237	Hspb8	heat shock protein 8	Multiple_Complex
TC0100002604.mm.1	13.14	13.7	-1.47	0.0073	0.2868	Tuba4a	tubulin, alpha 4A	Coding
TC0X00000388.mm.1	10.6	11.15	-1.46	0.0002	0.1265	Gria3	glutamate receptor, ionotropic, AMPA3 (alpha 3); glutamate receptor, ionotropic, AMPA3 (alpha 3) (Gria3), mRNA.	Multiple_Complex
TC0400002733.mm.1	8.18	8.73	-1.46	0.0008	0.1766	Svep1	sushi, von Willebrand factor type A, EGF and pentraxin domain containing 1	Multiple_Complex
TC1800000111.mm.1	12.07	12.62	-1.46	0.0009	0.1787	Impact	impact, RWD domain protein; imprinted and ancient	Multiple_Complex
TC0800002402.mm.1	8.86	9.4	-1.46	0.0155	0.3329	Mpv17l2	MPV17 mitochondrial membrane protein-like 2	Coding
TC0300001249.mm.1	10.92	11.46	-1.45	0.0003	0.1391	Pde5a	phosphodiesterase 5A, cGMP-specific	Coding
TC0100001379.mm.1	12.06	12.6	-1.45	0.0003	0.1427	Rgs8	regulator of G-protein signaling 8	Multiple_Complex
TC1900000756.mm.1	10.55	11.08	-1.45	0.0009	0.1784	Dusp5	dual specificity phosphatase 5	Coding
TC0100003508.mm.1	10.24	10.77	-1.45	0.0012	0.1931	Uhmk1	U2AF homology motif (UHM) kinase 1	Multiple_Complex
TC0X00003364.mm.1	8.87	9.41	-1.45	0.0036	0.2485	Frmpd4	FERM and PDZ domain containing 4	Multiple_Complex
TC1100002122.mm.1	8.24	8.77	-1.45	0.0071	0.2854	Nefh	neurofilament, heavy polypeptide; Synthetic construct Mus musculus clone IMAGE:100068375, MGC:195919 neurofilament, heavy polypeptide (Nefh) mRNA, encodes complete protein.	Multiple_Complex
TC0600002066.mm.1	7.24	7.78	-1.45	0.019	0.3482	Slc13a4	solute carrier family 13 (sodium/sulfate symporters), member 4	Multiple_Complex
TC0200000347.mm.1	9.62	10.14	-1.44	0.0002	0.1265	Gad2	glutamic acid decarboxylase 2	Multiple_Complex
TSUnmapped00000043.mm.1	13.24	13.77	-1.44	0.0004	0.1494	Rora	RAR-related orphan receptor alpha	Coding
TC1700001215.mm.1	11.45	11.98	-1.44	0.0005	0.1552	Arhgef33	Rho guanine nucleotide exchange factor (GEF) 33	Multiple_Complex
TC1300000366.mm.1	6.21	6.73	-1.44	0.0035	0.2475	Serpinb1b	serine (or cysteine) peptidase inhibitor, clade B, member 1b	Coding
TC0600003534.mm.1	10.37	10.89	-1.44	0.0055	0.2664	Vamp1	vesicle-associated membrane protein 1	Coding
TC1100003233.mm.1	9.91	10.44	-1.44	0.0069	0.2833	Doc2b	double C2, beta	Coding
TC0900002588.mm.1	6.36	6.89	-1.44	0.0371	0.3932	Fam81a	family with sequence similarity 81, member A	Multiple_Complex
TC1100002493.mm.1	6.6	7.11	-1.43	0.0003	0.1383	Kcnip1	Kv channel-interacting protein 1	Multiple_Complex
TC0200001951.mm.1	10.37	10.89	-1.43	0.0013	0.198	Slc20a1	solute carrier family 20, member 1	Multiple_Complex
TC0100003679.mm.1	8.92	9.44	-1.43	0.0024	0.2306	Ephx1	epoxide hydrolase 1, microsomal	Coding
TC0400004104.mm.1	8.34	8.86	-1.43	0.003	0.2371	Ajap1	adherens junction associated protein 1	Coding
TC1000001183.mm.1	10.76	11.28	-1.43	0.003	0.237	Btg1	B cell translocation gene 1, anti-proliferative	Multiple_Complex
TC0900000496.mm.1	10.04	10.56	-1.43	0.0039	0.2547	Thy1	thymus cell antigen 1, theta	Multiple_Complex
TC1800000322.mm.1	9.77	10.29	-1.43	0.0042	0.2572	Psd2	pleckstrin and Sec7 domain containing 2; pleckstrin and Sec7 domain containing 2 (Psd2), mRNA.	Multiple_Complex
TC1200001544.mm.1	15.69	16.21	-1.43	0.0146	0.3305	Id2	inhibitor of DNA binding 2	Coding
TC0200003759.mm.1	7.85	8.36	-1.42	0.0004	0.1471	Chn1	chimerin 1; chimerin (chimaerin) 1	Multiple_Complex
TC0600003176.mm.1	11.14	11.64	-1.42	0.0004	0.1494	Prmt8	protein arginine N-methyltransferase 8	Coding
TC0300001206.mm.1	8.03	8.54	-1.42	0.0005	0.1513	Plppr5	phospholipid phosphatase related 5	Coding
TC0600000386.mm.1	9.74	10.25	-1.42	0.0006	0.1592	Clec2l	C-type lectin domain family 2, member L	Coding
TC0400003171.mm.1	6.24	6.74	-1.42	0.0008	0.1737	Wdr78	WD repeat domain 78	Multiple_Complex
TC0500001912.mm.1	8.64	9.15	-1.42	0.0009	0.1787	Steap2	six transmembrane epithelial antigen of prostate 2	Multiple_Complex
TC0400001013.mm.1	8.19	8.69	-1.42	0.003	0.2371	Ror1	receptor tyrosine kinase-like orphan receptor 1	Multiple_Complex
TC1300001635.mm.1	4.9	5.4	-1.42	0.0046	0.2581	Hist1h2bf	histone cluster 1, H2bf; Synthetic construct Mus musculus clone IMAGE:100064051, MGC:193422 histone cluster 1, H2bf (Hist1h2bf) mRNA, encodes complete protein.	Coding
TC0100002606.mm.1	10.09	10.6	-1.42	0.0072	0.2854	Ptprn	protein tyrosine phosphatase, receptor type, N; Synthetic construct Mus musculus clone IMAGE:100062115, MGC:190366 protein tyrosine phosphatase, receptor type, N (Ptprn) mRNA, encodes complete protein.	Coding
TC0800001129.mm.1	4.67	5.18	-1.42	0.04	0.3988	Drc7	dynein regulatory complex subunit 7	Coding
TC1800001744.mm.1	11	11.5	-1.41	0.0005	0.1503	Arhgap26	Rho GTPase activating protein 26	Multiple_Complex
TC1300002606.mm.1	14.21	14.71	-1.41	0.0006	0.1605	Rgs7bp	regulator of G-protein signalling 7 binding protein	Multiple_Complex
TC0500001730.mm.1	7.36	7.86	-1.41	0.0007	0.1683	Grid2ip	glutamate receptor, ionotropic, delta 2 (Grid2) interacting protein 1	Multiple_Complex
TC1100002666.mm.1	4.08	4.57	-1.41	0.0009	0.1799	Ltc4s	leukotriene C4 synthase	Coding
TC0800000742.mm.1	9.02	9.52	-1.41	0.0011	0.1899	Homer3	homer homolog 3 (Drosophila)	Multiple_Complex
TC0X00003301.mm.1	9.98	10.47	-1.41	0.0029	0.237	Reps2	RALBP1 associated Eps domain containing protein 2	Multiple_Complex
TC0900002347.mm.1	10.74	11.24	-1.41	0.0061	0.2751	Peak1	pseudopodium-enriched atypical kinase 1	Multiple_Complex
TC1600000089.mm.1	11.2	11.69	-1.41	0.0065	0.2801	Abat	4-aminobutyrate aminotransferase	Multiple_Complex
TC1800000364.mm.1	6.81	7.31	-1.41	0.0089	0.2995	Pcdhb9	protocadherin beta 9	Coding
TC0400002073.mm.1	6.97	7.46	-1.41	0.0096	0.3013	Cfap74	cilia and flagella associated protein 74	Multiple_Complex
TC1300002405.mm.1	6.53	7.02	-1.41	0.011	0.3113	Atp6ap1l	ATPase, H+ transporting, lysosomal accessory protein 1-like	Multiple_Complex
TC1200000263.mm.1	6.51	7	-1.41	0.0133	0.3242	Lamb1	laminin B1	Multiple_Complex
TC0500003576.mm.1	5.09	5.58	-1.41	0.0236	0.363	Baiap2l1	BAI1-associated protein 2-like 1	Multiple_Complex
TC0100003586.mm.1	12.76	13.25	-1.41	0.0391	0.3964	Ackr1	atypical chemokine receptor 1 (Duffy blood group)	Coding
TC0X00000319.mm.1	7.98	8.47	-1.41	0.0482	0.411	Lonrf3	LON peptidase N-terminal domain and ring finger 3	Multiple_Complex
TC1400001747.mm.1	13.23	13.71	-1.4	0.0006	0.1629	Ghitm	growth hormone inducible transmembrane protein	Multiple_Complex
TC0400000438.mm.1	5.16	5.64	-1.4	0.001	0.1877	Car9	carbonic anhydrase 9	Multiple_Complex
TC1200000145.mm.1	12.33	12.82	-1.4	0.0012	0.1931	Hpcal1	hippocalcin-like 1	Multiple_Complex
TC0600001268.mm.1	12.35	12.84	-1.4	0.0016	0.2058	Slc6a1	solute carrier family 6 (neurotransmitter transporter, GABA), member 1	Coding
TC0800000736.mm.1	8.24	8.73	-1.4	0.0019	0.2194	Hapln4	hyaluronan and proteoglycan link protein 4	Coding
TC1700002418.mm.1	9.4	9.88	-1.4	0.0027	0.2323	Twsg1	twisted gastrulation homolog 1 (Drosophila)	Coding
TC0700001385.mm.1	8.35	8.84	-1.4	0.0033	0.2425	Gdpd5	glycerophosphodiester phosphodiesterase domain containing 5	Coding
TC1100003629.mm.1	6.69	7.17	-1.4	0.0039	0.2551	Pnpo	pyridoxine 5-phosphate oxidase; pyridoxine 5'-phosphate oxidase	Multiple_Complex
TC1200002158.mm.1	10.22	10.7	-1.4	0.0049	0.2607	Sel1l	sel-1 suppressor of lin-12-like (C. elegans)	Multiple_Complex
TC0400001510.mm.1	10.53	11.01	-1.39	0.0003	0.1309	Rnf19b	ring finger protein 19B	Multiple_Complex
TC1200001643.mm.1	12.06	12.53	-1.39	0.0007	0.1673	Tspan13	tetraspanin 13	Coding
TC0X00002637.mm.1	8.49	8.97	-1.39	0.0012	0.1931	Pdk3	pyruvate dehydrogenase kinase, isoenzyme 3	Multiple_Complex
TC1300001670.mm.1	8.38	8.86	-1.39	0.0042	0.2572	Aldh5a1	aldhehyde dehydrogenase family 5, subfamily A1	Multiple_Complex
TC0600003578.mm.1	3.32	3.79	-1.39	0.0078	0.2873	Igkv5-45	immunoglobulin kappa chain variable 5-45	Coding
TC0600000664.mm.1	4.56	5.03	-1.39	0.0083	0.2929	Aqp1	aquaporin 1	Coding
TC1100001723.mm.1	9.81	10.28	-1.39	0.0128	0.3204	Crhr1	corticotropin releasing hormone receptor 1; corticotropin releasing hormone receptor 1 (Crhr1), mRNA.	Multiple_Complex
TC0200003674.mm.1	11.64	12.1	-1.38	0.0003	0.1427	Scn1a	sodium channel, voltage-gated, type I, alpha	Multiple_Complex
TC1000000045.mm.1	9.9	10.36	-1.38	0.0008	0.1784	Lrp11	low density lipoprotein receptor-related protein 11	Coding
TC0100000259.mm.1	11.51	11.98	-1.38	0.0011	0.1907	Inpp4a	inositol polyphosphate-4-phosphatase, type I	Multiple_Complex
TC1800000580.mm.1	8.2	8.67	-1.38	0.0015	0.2003	Ctxn3	cortexin 3	Coding
TC1100004187.mm.1	12.03	12.5	-1.38	0.0019	0.2172	Nptx1	neuronal pentraxin 1	Coding
TC1000003220.mm.1	9.95	10.42	-1.38	0.0021	0.2215	Nt5dc3	5-nucleotidase domain containing 3; Synthetic construct Mus musculus clone IMAGE:100069513, MGC:199415 5'-nucleotidase domain containing 3 (Nt5dc3) mRNA, encodes complete protein.; 5'-nucleotidase domain containing 3	Coding
TC0X00003426.mm.1	7.39	7.85	-1.38	0.0039	0.254	C1galt1c1	C1GALT1-specific chaperone 1	Coding
TC0800000661.mm.1	9.21	9.67	-1.38	0.0043	0.2572	Spock3	sparc/osteonectin, cwcv and kazal-like domains proteoglycan 3	Multiple_Complex
TC0700003476.mm.1	6.18	6.65	-1.38	0.0065	0.2797	Nr2f2	nuclear receptor subfamily 2, group F, member 2	Multiple_Complex
TC1800001301.mm.1	5.05	5.52	-1.38	0.013	0.3227	Mospd4	motile sperm domain containing 4	Multiple_Complex
TC1700000703.mm.1	6.45	6.92	-1.38	0.0438	0.4043	Ier3	immediate early response 3	Coding
TC0100003203.mm.1	9.54	10	-1.37	0.0005	0.1513	Trove2	TROVE domain family, member 2	Multiple_Complex
TC1300002311.mm.1	6.19	6.64	-1.37	0.0009	0.1784	Cep72	centrosomal protein 72	Coding
TC1700001143.mm.1	7.42	7.87	-1.37	0.0018	0.2172	Clip4	CAP-GLY domain containing linker protein family, member 4	Multiple_Complex
TC1400000363.mm.1	13.87	14.32	-1.37	0.002	0.2194	Gdf10	growth differentiation factor 10	Coding
TC0700002105.mm.1	9.29	9.75	-1.37	0.0023	0.2277	Shank2	SH3/ankyrin domain gene 2; Synthetic construct Mus musculus clone IMAGE:100068071, MGC:195688 SH3/ankyrin domain gene 2 (Shank2) mRNA, encodes complete protein.	Multiple_Complex
TC0700004575.mm.1	5.53	5.98	-1.37	0.0026	0.2306	Th	tyrosine hydroxylase; Synthetic construct Mus musculus clone IMAGE:100062130, MGC:190374 tyrosine hydroxylase (Th) mRNA, encodes complete protein.	Coding
TC1100002103.mm.1	7.23	7.69	-1.37	0.0029	0.237	Tcn2	transcobalamin 2	Coding
TC1500002012.mm.1	10.21	10.65	-1.37	0.003	0.2371	Cerk	ceramide kinase	Multiple_Complex
TC1100002091.mm.1	10.06	10.51	-1.37	0.0036	0.2503	Inpp5j	inositol polyphosphate 5-phosphatase J	Coding
TC0700001800.mm.1	10.62	11.07	-1.37	0.0048	0.2602	Sbk1	SH3-binding kinase 1	Multiple_Complex
TC0700000907.mm.1	8.04	8.5	-1.37	0.0094	0.3011	Slc6a5	solute carrier family 6 (neurotransmitter transporter, glycine), member 5	Coding
TC0100002495.mm.1	8.94	9.4	-1.37	0.0152	0.3329	Acadl	acyl-Coenzyme A dehydrogenase, long-chain	Multiple_Complex
TC1200001299.mm.1	6.4	6.86	-1.37	0.0447	0.4047	Vipr2	vasoactive intestinal peptide receptor 2	Multiple_Complex
TC0600001193.mm.1	16.27	16.71	-1.36	0.0004	0.1494	Itpr1	inositol 1,4,5-trisphosphate receptor 1; Synthetic construct Mus musculus clone IMAGE:100069456, MGC:199358 inositol 1,4,5-triphosphate receptor 1 (Itpr1) mRNA, encodes complete protein.	Multiple_Complex
TC0700000800.mm.1	11.06	11.51	-1.36	0.0009	0.1784	Shank1	SH3/ankyrin domain gene 1	Multiple_Complex
TC0400001107.mm.1	9.08	9.52	-1.36	0.0011	0.1899	Dhcr24	24-dehydrocholesterol reductase	Coding
TC0500003219.mm.1	10.78	11.22	-1.36	0.0019	0.2194	Camkk2	calcium/calmodulin-dependent protein kinase kinase 2, beta	Multiple_Complex
TC1200001031.mm.1	9.1	9.54	-1.36	0.0027	0.2323	Ppp4r4	protein phosphatase 4, regulatory subunit 4	Coding
TC0600000245.mm.1	7.49	7.93	-1.36	0.0089	0.2995	Ahcyl2	S-adenosylhomocysteine hydrolase-like 2	Multiple_Complex
TC1100001030.mm.1	3.87	4.31	-1.36	0.0198	0.3512	Olfr23	olfactory receptor 23; Synthetic construct Mus musculus clone IMAGE:100013745, MGC:167574 olfactory receptor 23 (Olfr23) mRNA, encodes complete protein.; Synthetic construct Mus musculus clone IMAGE:100016419, MGC:184512 olfactory receptor 23 (Olfr23) mRNA, encodes complete protein.	Coding
TC0700000811.mm.1	13.75	14.18	-1.35	0.0006	0.1628	Kcnc3	potassium voltage gated channel, Shaw-related subfamily, member 3	Coding
TC0900002312.mm.1	12.03	12.46	-1.35	0.0008	0.1768	Elmod1	ELMO/CED-12 domain containing 1; Synthetic construct Mus musculus clone IMAGE:100016324, MGC:184530 ELMO domain containing 1 (Elmod1) mRNA, encodes complete protein.	Multiple_Complex
TC1100000908.mm.1	6.27	6.7	-1.35	0.001	0.1884	Kcnab3	potassium voltage-gated channel, shaker-related subfamily, beta member 3	Multiple_Complex
TC0700001409.mm.1	6.34	6.77	-1.35	0.003	0.2371	Ucp2	uncoupling protein 2 (mitochondrial, proton carrier)	Multiple_Complex
TC1200002564.mm.1	4.69	5.12	-1.35	0.0043	0.2581	Ighv5-9-1	immunoglobulin heavy variable 5-9-1	Coding
TC1200002346.mm.1	9.63	10.06	-1.35	0.0046	0.2581	Ccdc85c	coiled-coil domain containing 85C	Coding
TC1000001993.mm.1	4.78	5.21	-1.35	0.0046	0.2581	Fam26e	family with sequence similarity 26, member E	Coding
TC0300001330.mm.1	5.27	5.7	-1.35	0.0059	0.2717	Lef1	lymphoid enhancer binding factor 1; lymphoid enhancer binding factor 1 (Lef1), mRNA.	Multiple_Complex
TC0200001963.mm.1	7.91	8.34	-1.35	0.0064	0.2793	Stk35	serine/threonine kinase 35	Multiple_Complex
TC0300001306.mm.1	9.86	10.29	-1.35	0.0075	0.287	Elovl6	ELOVL family member 6, elongation of long chain fatty acids (yeast)	Coding
TC1600000429.mm.1	7.94	8.37	-1.35	0.0144	0.3296	Cep19	centrosomal protein 19	Coding
TC1400001290.mm.1	10.19	10.62	-1.35	0.0245	0.3657	Dnajc3	DnaJ (Hsp40) homolog, subfamily C, member 3	Coding
TC1500000553.mm.1	4.25	4.68	-1.35	0.0277	0.3739	Ly6g	lymphocyte antigen 6 complex, locus G	Coding
TC0600002492.mm.1	10.58	11.02	-1.35	0.0292	0.3772	Tgoln1; Tgoln2	trans-golgi network protein; trans-golgi network protein 2; Synthetic construct Mus musculus clone IMAGE:100063853, MGC:193320 trans-golgi network protein 2 (Tgoln2) mRNA, encodes complete protein.	Coding
TC0100003319.mm.1	8.25	8.68	-1.35	0.0335	0.3871	Soat1	sterol O-acyltransferase 1	Multiple_Complex
TC1400002040.mm.1	4.67	5.11	-1.35	0.039	0.3961	Olfr1507	olfactory receptor 1507	Coding
TC0300000579.mm.1	3.78	4.21	-1.35	0.0403	0.3992	Arl14	ADP-ribosylation factor-like 14	Multiple_Complex
TC1300001169.mm.1	9.01	9.44	-1.34	0.0004	0.1494	Sgtb	small glutamine-rich tetratricopeptide repeat (TPR)-containing, beta	Coding
TC1400000072.mm.1	9.41	9.83	-1.34	0.0005	0.151	Abhd6	abhydrolase domain containing 6	Coding
TC1100003245.mm.1	8.43	8.85	-1.34	0.0005	0.1494	Abr	active BCR-related gene	Multiple_Complex
TC1900000866.mm.1	8.38	8.81	-1.34	0.0005	0.1552	Grk5	G protein-coupled receptor kinase 5	Coding
TC1100001156.mm.1	16.4	16.83	-1.34	0.0007	0.1673	Aldoc	aldolase C, fructose-bisphosphate	Multiple_Complex
TC1100003137.mm.1	7.53	7.96	-1.34	0.0008	0.1768	Pitpnm3	PITPNM family member 3	Multiple_Complex
TC0700000006.mm.1	12.77	13.2	-1.34	0.0008	0.1768	Prkcg	protein kinase C, gamma	Coding
TC0700004081.mm.1	8.13	8.56	-1.34	0.0009	0.1784	Nrip3	nuclear receptor interacting protein 3	Coding
TC0900002934.mm.1	7	7.43	-1.34	0.0012	0.1931	Il20rb	interleukin 20 receptor beta	Multiple_Complex
TC1800000827.mm.1	13.84	14.26	-1.34	0.0014	0.1992	St8sia5	ST8 alpha-N-acetyl-neuraminide alpha-2,8-sialyltransferase 5	Coding
TC0600002936.mm.1	12.26	12.68	-1.34	0.0017	0.2079	Atp2b2	ATPase, Ca++ transporting, plasma membrane 2	Multiple_Complex
TC0100001237.mm.1	11.78	12.2	-1.34	0.002	0.2194	Syt2	synaptotagmin II	Coding
TC0200004396.mm.1	8.76	9.19	-1.34	0.0022	0.2233	Rasgrp1	RAS guanyl releasing protein 1; RAS guanyl releasing protein 1 (Rasgrp1), mRNA.	Multiple_Complex
TC0100001526.mm.1	7.85	8.27	-1.34	0.0023	0.2284	Creg1	cellular repressor of E1A-stimulated genes 1	Coding
TC1000000852.mm.1	7.16	7.58	-1.34	0.0025	0.2306	Reep6	receptor accessory protein 6	Multiple_Complex
TC0400001209.mm.1	6.38	6.8	-1.34	0.0026	0.2306	Trabd2b	TraB domain containing 2B	Multiple_Complex
TC0900000532.mm.1	6.54	6.97	-1.34	0.0069	0.2832	Mpzl3	myelin protein zero-like 3	Multiple_Complex
TC0100002556.mm.1	8.72	9.15	-1.34	0.0072	0.2854	2004-03-01	membrane-associated ring finger (C3HC4) 4	Multiple_Complex
TC0900002608.mm.1	7.87	8.29	-1.34	0.0072	0.286	Cgnl1	cingulin-like 1	Multiple_Complex
TC0700004080.mm.1	9.41	9.83	-1.34	0.0093	0.3011	Tmem9b	TMEM9 domain family, member B	Multiple_Complex
TC0300002895.mm.1	9.12	9.54	-1.34	0.0095	0.3013	Ugt8a	UDP galactosyltransferase 8A	Coding
TC0200004154.mm.1	6.37	6.8	-1.34	0.0106	0.3085	Tspan18	tetraspanin 18	Multiple_Complex
TC0800001106.mm.1	9.81	10.23	-1.34	0.0154	0.3329	Herpud1	homocysteine-inducible, endoplasmic reticulum stress-inducible, ubiquitin-like domain member 1	Multiple_Complex
TC0900001124.mm.1	4.99	5.41	-1.34	0.0174	0.3412	Mrap2	melanocortin 2 receptor accessory protein 2	Coding
TC0700000990.mm.1	9.65	10.07	-1.34	0.0184	0.3471	Vimp	VCP-interacting membrane protein	Coding
TC0200002550.mm.1	4.82	5.25	-1.34	0.0216	0.3573	Eya2	eyes absent 2 homolog (Drosophila); eyes absent 2 homolog (Drosophila) (Eya2), mRNA.	Multiple_Complex
TC0600000672.mm.1	12.94	13.36	-1.34	0.0424	0.4042	Ppp1r17	protein phosphatase 1, regulatory subunit 17	Coding
TC0900000407.mm.1	3.49	3.92	-1.34	0.044	0.4043	Olfr911-ps1	olfactory receptor 911, pseudogene 1	Multiple_Complex
TC0900000719.mm.1	10.46	10.87	-1.33	0.0008	0.1784	Ubl7	ubiquitin-like 7 (bone marrow stromal cell-derived)	Coding
TC1100003562.mm.1	10.94	11.36	-1.33	0.001	0.1859	Cacna1g	calcium channel, voltage-dependent, T type, alpha 1G subunit	Multiple_Complex
TC1200002029.mm.1	7.56	7.97	-1.33	0.0013	0.198	Map3k9	mitogen-activated protein kinase kinase kinase 9	Multiple_Complex
TC0600002904.mm.1	11.66	12.08	-1.33	0.0019	0.2172	Srgap3	SLIT-ROBO Rho GTPase activating protein 3; Synthetic construct Mus musculus clone IMAGE:100068111, MGC:195728 SLIT-ROBO Rho GTPase activating protein 3 (Srgap3) mRNA, encodes complete protein.	Multiple_Complex
TC1100001331.mm.1	13.3	13.71	-1.33	0.0022	0.2233	Trim37	tripartite motif-containing 37; tripartite motif-containing 37 (Trim37), mRNA.	Multiple_Complex
TC0200002876.mm.1	7.26	7.67	-1.33	0.0025	0.2306	Camk1d	calcium/calmodulin-dependent protein kinase ID	Multiple_Complex
TC0300000181.mm.1	9.54	9.95	-1.33	0.0025	0.2306	Eif5a2	eukaryotic translation initiation factor 5A2	Coding
TC0600003060.mm.1	8.24	8.65	-1.33	0.0026	0.2306	Iqsec3	IQ motif and Sec7 domain 3; Synthetic construct Mus musculus clone IMAGE:100068357, MGC:195901 IQ motif and Sec7 domain 3 (Iqsec3) mRNA, encodes complete protein.; IQ motif and Sec7 domain 3 (Iqsec3), mRNA.	Multiple_Complex
TC1200001742.mm.1	6.65	7.06	-1.33	0.0027	0.2315	Egln3	egl-9 family hypoxia-inducible factor 3; EGL nine homolog 3 (C. elegans)	Coding
TC0200001023.mm.1	11.69	12.1	-1.33	0.0031	0.2394	Gad1	glutamate decarboxylase 1	Multiple_Complex
TC1100001183.mm.1	9.13	9.53	-1.33	0.0036	0.2495	Rab11fip4	RAB11 family interacting protein 4 (class II)	Multiple_Complex
TC0800000982.mm.1	10.22	10.64	-1.33	0.0046	0.2581	Wdr83os	WD repeat domain 83 opposite strand	Multiple_Complex
TC1200000007.mm.1	10.19	10.6	-1.33	0.0047	0.2581	Kif3c	kinesin family member 3C	Multiple_Complex
TC1900000152.mm.1	8.06	8.47	-1.33	0.0098	0.3028	Wdr74	WD repeat domain 74	Coding
TSUnmapped00000023.mm.1	10.61	11.02	-1.33	0.0113	0.3129	Rbm4	RNA binding motif protein 4	Coding
TC0200005508.mm.1	7.69	8.1	-1.33	0.014	0.3274	Nanp	N-acetylneuraminic acid phosphatase	Multiple_Complex
TC0300002619.mm.1	7.52	7.93	-1.33	0.0149	0.3315	Sycp1	synaptonemal complex protein 1	Coding
TC0600001671.mm.1	8.57	8.99	-1.33	0.0213	0.3563	Slco1c1	solute carrier organic anion transporter family, member 1c1	Coding
TC1300001326.mm.1	8.89	9.3	-1.33	0.0237	0.3635	Emb	embigin	Coding
TC0500002386.mm.1	6.25	6.66	-1.33	0.0284	0.3749	Adgra3; Adgra2	adhesion G protein-coupled receptor A3; adhesion G protein-coupled receptor A2	Coding
TC1000001768.mm.1	7.61	8.02	-1.33	0.0412	0.4012	Phactr2	phosphatase and actin regulator 2	Multiple_Complex
TC0200000013.mm.1	7.64	8.04	-1.32	0.0006	0.1605	Fam107b	family with sequence similarity 107, member B	Coding
TC0700003031.mm.1	8.8	9.2	-1.32	0.0008	0.1738	Abcc8	ATP-binding cassette, sub-family C (CFTR/MRP), member 8	Coding
TC0400002849.mm.1	10.08	10.47	-1.32	0.0011	0.1906	Megf9	multiple EGF-like-domains 9	Coding
TC1000000299.mm.1	10.98	11.38	-1.32	0.0011	0.1897	Tspyl4	TSPY-like 4	Multiple_Complex
TC1400000998.mm.1	14.38	14.77	-1.32	0.0014	0.1992	Phyhip	phytanoyl-CoA hydroxylase interacting protein	Coding
TC0600001293.mm.1	13.03	13.44	-1.32	0.0016	0.207	Fam21	family with sequence similarity 21	Coding
TC1800000694.mm.1	10.1	10.51	-1.32	0.0021	0.2203	Gnal	guanine nucleotide binding protein, alpha stimulating, olfactory type; guanine nucleotide binding protein, alpha stimulating, olfactory type (Gnal), transcript variant 2, mRNA.	Multiple_Complex
TC0800001143.mm.1	13.44	13.84	-1.32	0.0028	0.237	Ndrg4	N-myc downstream regulated gene 4	Multiple_Complex
TC1800000802.mm.1	11.85	12.24	-1.32	0.0029	0.237	Dym	dymeclin	Coding
TC1500000160.mm.1	8.76	9.16	-1.32	0.005	0.2607	Myo10	myosin X; Synthetic construct Mus musculus clone IMAGE:100063295, MGC:191057 myosin X (Myo10) mRNA, encodes complete protein.	Multiple_Complex
TC0900001042.mm.1	11.86	12.26	-1.32	0.0061	0.2747	Elovl5	ELOVL family member 5, elongation of long chain fatty acids (yeast)	Multiple_Complex
TC0800002843.mm.1	10.53	10.92	-1.32	0.0074	0.2868	Lcat	lecithin cholesterol acyltransferase	Coding
TC0200001662.mm.1	9.46	9.86	-1.32	0.0085	0.2955	Lpcat4	lysophosphatidylcholine acyltransferase 4	Multiple_Complex
TC1000003218.mm.1	10.14	10.54	-1.32	0.0114	0.3129	Atp5d	ATP synthase, H+ transporting, mitochondrial F1 complex, delta subunit	Coding
TC0200001642.mm.1	4.14	4.54	-1.32	0.0173	0.3408	Olfr1280	olfactory receptor 1280	Coding
TC0200004086.mm.1	3.89	4.29	-1.32	0.0193	0.3488	Olfr1271	olfactory receptor 1271	Coding
TC0400001091.mm.1	11.87	12.27	-1.32	0.0193	0.3488	Plpp3	phospholipid phosphatase 3	Multiple_Complex
TC0600001942.mm.1	6.05	6.45	-1.32	0.0254	0.3678	Iqub	IQ motif and ubiquitin domain containing	Coding
TC1000002646.mm.1	8.31	8.71	-1.32	0.0301	0.3793	Mybpc1	myosin binding protein C, slow-type	Multiple_Complex
TC0X00001892.mm.1	7.6	8	-1.32	0.0311	0.3814	Maob	monoamine oxidase B	Coding
TC1300001204.mm.1	9.35	9.76	-1.32	0.0373	0.3932	Elovl7	ELOVL family member 7, elongation of long chain fatty acids (yeast)	Coding
TC0700000874.mm.1	12.16	12.54	-1.31	0.0007	0.1677	Kcnc1	potassium voltage gated channel, Shaw-related subfamily, member 1	Multiple_Complex
TC0600001696.mm.1	11.44	11.82	-1.31	0.0008	0.1768	Etnk1	ethanolamine kinase 1	Coding
TC1300000466.mm.1	10.08	10.47	-1.31	0.0009	0.1815	Smim13	small integral membrane protein 13	Multiple_Complex
TC0500000699.mm.1	6.58	6.97	-1.31	0.0011	0.1899	Rasl11b	RAS-like, family 11, member B	Multiple_Complex
TC1200000840.mm.1	11.01	11.39	-1.31	0.0014	0.1992	Ttll5	tubulin tyrosine ligase-like family, member 5; Synthetic construct Mus musculus clone IMAGE:100063434, MGC:191084 tubulin tyrosine ligase-like family, member 5 (Ttll5) mRNA, encodes complete protein.	Multiple_Complex
TC0300000159.mm.1	7.97	8.37	-1.31	0.0016	0.2071	Nceh1	neutral cholesterol ester hydrolase 1	Multiple_Complex
TC1300001997.mm.1	9.74	10.12	-1.31	0.0018	0.2142	Shc3	src homology 2 domain-containing transforming protein C3	Coding
TC1200000018.mm.1	9.55	9.94	-1.31	0.0019	0.2172	Dnajc27	DnaJ (Hsp40) homolog, subfamily C, member 27	Multiple_Complex
TC0200000250.mm.1	7.2	7.59	-1.31	0.0022	0.2233	Cacnb2	calcium channel, voltage-dependent, beta 2 subunit; calcium channel, voltage-dependent, beta 2 subunit (Cacnb2), transcript variant 3, long non-coding RNA.	Multiple_Complex
TC0500001451.mm.1	8.65	9.04	-1.31	0.0026	0.2306	Atp6v0a2	ATPase, H+ transporting, lysosomal V0 subunit A2; ATPase, H+ transporting, lysosomal V0 subunit A2 (Atp6v0a2), mRNA.	Multiple_Complex
TC0900002875.mm.1	12.85	13.25	-1.31	0.0027	0.2323	Atp1b3	ATPase, Na+/K+ transporting, beta 3 polypeptide	Multiple_Complex
TC0400001233.mm.1	9.89	10.28	-1.31	0.003	0.2371	Efcab14	EF-hand calcium binding domain 14	Multiple_Complex
TC0100002696.mm.1	14.33	14.72	-1.31	0.0035	0.2475	Dner	delta/notch-like EGF repeat containing; delta/notch-like EGF-related receptor	Coding
TC1400001321.mm.1	9.16	9.54	-1.31	0.0046	0.2581	Ubac2	ubiquitin associated domain containing 2	Coding
TC0200004667.mm.1	9.71	10.1	-1.31	0.0083	0.2926	Slc23a2	solute carrier family 23 (nucleobase transporters), member 2	Multiple_Complex
TC0900000589.mm.1	8.65	9.04	-1.31	0.0101	0.306	Usp28	ubiquitin specific peptidase 28	Coding
TC0500002343.mm.1	8.79	9.18	-1.31	0.0108	0.3087	Qdpr	quinoid dihydropteridine reductase	Multiple_Complex
TC0700001119.mm.1	9.32	9.7	-1.31	0.0409	0.4004	Abhd2	abhydrolase domain containing 2	Multiple_Complex
TC0100002667.mm.1	8.48	8.87	-1.31	0.0429	0.4043	Irs1	insulin receptor substrate 1; Synthetic construct Mus musculus clone IMAGE:100063397, MGC:191077 insulin receptor substrate 1 (Irs1) mRNA, encodes complete protein.	Multiple_Complex
TC0500003193.mm.1	7.95	8.33	-1.31	0.044	0.4043	Aldh2	aldehyde dehydrogenase 2, mitochondrial	Multiple_Complex
TC0100000659.mm.1	8.54	8.92	-1.3	0.001	0.1884	Gmppa	GDP-mannose pyrophosphorylase A	Multiple_Complex
TC1800000945.mm.1	12.05	12.43	-1.3	0.0013	0.1977	Kif5b	kinesin family member 5B	Multiple_Complex
TC1200001108.mm.1	6.9	7.28	-1.3	0.0016	0.2071	Cyp46a1	cytochrome P450, family 46, subfamily a, polypeptide 1	Coding
TC1100004279.mm.1	6.73	7.1	-1.3	0.0017	0.2079	Rab37	RAB37, member RAS oncogene family; RAB37, member of RAS oncogene family	Multiple_Complex
TC0100001855.mm.1	10.08	10.46	-1.3	0.0018	0.2148	Lpgat1	lysophosphatidylglycerol acyltransferase 1	Multiple_Complex
TC0600000648.mm.1	13.97	14.35	-1.3	0.0022	0.2249	Chn2	chimerin 2; chimerin (chimaerin) 2	Multiple_Complex
TC0200004241.mm.1	11.46	11.83	-1.3	0.0029	0.237	Hipk3; Mir1902	homeodomain interacting protein kinase 3; microRNA 1902	Multiple_Complex
TC0600003163.mm.1	13.63	14.02	-1.3	0.0034	0.2453	Kcna1	potassium voltage-gated channel, shaker-related subfamily, member 1	Multiple_Complex
TC0400003514.mm.1	12.94	13.32	-1.3	0.0034	0.2467	Maneal	mannosidase, endo-alpha-like	Coding
TC0900001666.mm.1	12.75	13.13	-1.3	0.0035	0.2481	Sacm1l	SAC1 (suppressor of actin mutations 1, homolog)-like (S. cerevisiae)	Coding
TC0300000968.mm.1	7.99	8.36	-1.3	0.0044	0.2581	Prkab2	protein kinase, AMP-activated, beta 2 non-catalytic subunit	Multiple_Complex
TC1400002343.mm.1	10.42	10.8	-1.3	0.005	0.2607	Bmp1	bone morphogenetic protein 1	Multiple_Complex
TC1700001865.mm.1	6.41	6.79	-1.3	0.0085	0.2945	Morc2b	microrchidia 2B	Coding
TC0400002800.mm.1	7.59	7.97	-1.3	0.009	0.2995	Whrn	whirlin	Multiple_Complex
TC0900003131.mm.1	6.59	6.97	-1.3	0.0096	0.3013	Stac	src homology three (SH3) and cysteine rich domain	Multiple_Complex
TC1500001870.mm.1	7.93	8.3	-1.3	0.0101	0.305	Tmem184b	transmembrane protein 184b	Multiple_Complex
TC1000001334.mm.1	9.78	10.16	-1.3	0.0104	0.3082	Ptprr	protein tyrosine phosphatase, receptor type, R	Multiple_Complex
TC1200002241.mm.1	4.51	4.89	-1.3	0.0117	0.3138	Tc2n	tandem C2 domains, nuclear; tandem C2 domains, nuclear (Tc2n), transcript variant 1, mRNA.	Multiple_Complex
TC0200005136.mm.1	10.98	11.35	-1.3	0.012	0.3153	Pltp	phospholipid transfer protein	Multiple_Complex
TC1300000082.mm.1	4.26	4.63	-1.3	0.0127	0.3204	Prl2c5	prolactin family 2, subfamily c, member 5	Multiple_Complex
TC0300002711.mm.1	9.96	10.34	-1.3	0.0127	0.3204	Slc6a17	solute carrier family 6 (neurotransmitter transporter), member 17	Multiple_Complex
TC1200001816.mm.1	8.18	8.56	-1.3	0.0143	0.3279	Fbxo33	F-box protein 33	Multiple_Complex
TC0200000057.mm.1	9.42	9.79	-1.3	0.0146	0.3306	Upf2	UPF2 regulator of nonsense transcripts homolog (yeast)	Multiple_Complex
TC1100001999.mm.1	9.43	9.81	-1.3	0.0261	0.3711	Gaa	glucosidase, alpha, acid	Multiple_Complex
TC0300001035.mm.1	10.6	10.99	-1.3	0.0302	0.3793	Tspan2	tetraspanin 2	Multiple_Complex
TC0600001078.mm.1	7.36	7.74	-1.3	0.0379	0.3941	Slc41a3	solute carrier family 41, member 3	Coding
TC0100000295.mm.1	6.04	6.42	-1.3	0.0387	0.396	Il1r1	interleukin 1 receptor, type I	Coding
TC0700003058.mm.1	3.82	4.2	-1.3	0.0401	0.3989	Mrgpra2b	MAS-related GPR, member A2B	Coding
TC0900000892.mm.1	10.93	11.3	-1.29	0.0012	0.1931	Rora	RAR-related orphan receptor alpha; RAR-related orphan receptor alpha (Rora), mRNA.	Multiple_Complex
TC1100000527.mm.1	12.31	12.67	-1.29	0.0018	0.2144	Mapk9	mitogen-activated protein kinase 9	Multiple_Complex
TC0300000307.mm.1	11.92	12.29	-1.29	0.0025	0.2306	Hspa4l	heat shock protein 4 like	Multiple_Complex
TC1900000819.mm.1	9.69	10.06	-1.29	0.0038	0.2525	Atrnl1	attractin like 1	Coding
TC0900002529.mm.1	7.31	7.68	-1.29	0.0039	0.2551	Aph1b	anterior pharynx defective 1b homolog (C. elegans)	Coding
TC1000003052.mm.1	7.81	8.18	-1.29	0.0045	0.2581	Srgap1	SLIT-ROBO Rho GTPase activating protein 1	Multiple_Complex
TC0X00001372.mm.1	6.32	6.68	-1.29	0.0058	0.2701	Tbc1d8b	TBC1 domain family, member 8B	Multiple_Complex
TC0500001737.mm.1	8.47	8.84	-1.29	0.0068	0.283	Cyth3	cytohesin 3	Coding
TC0X00001832.mm.1	7.89	8.25	-1.29	0.0077	0.2873	Dynlt3	dynein light chain Tctex-type 3	Multiple_Complex
TC1400002476.mm.1	8.54	8.91	-1.29	0.0085	0.2955	Dgkh	diacylglycerol kinase, eta; diacylglycerol kinase, eta (Dgkh), transcript variant 2, non-coding RNA.	Multiple_Complex
TC0100001048.mm.1	6.11	6.47	-1.29	0.0094	0.3011	Cntnap5a	contactin associated protein-like 5A; Synthetic construct Mus musculus clone IMAGE:100063575, MGC:191110 contactin associated protein-like 5A (Cntnap5a) mRNA, encodes complete protein.	Coding
TC0500000366.mm.1	7.59	7.96	-1.29	0.0094	0.3011	Nat8l	N-acetyltransferase 8-like	Multiple_Complex
TC0900003015.mm.1	7.82	8.18	-1.29	0.0095	0.3011	Grm2	glutamate receptor, metabotropic 2	Multiple_Complex
TC1500002142.mm.1	11.98	12.35	-1.29	0.0107	0.3085	Slc38a2	solute carrier family 38, member 2	Multiple_Complex
TC1100004204.mm.1	9.7	10.06	-1.29	0.0138	0.3274	Nploc4	nuclear protein localization 4 homolog (S. cerevisiae)	Multiple_Complex
TC1300001878.mm.1	9.66	10.02	-1.29	0.0147	0.3307	Gfod1	glucose-fructose oxidoreductase domain containing 1	Multiple_Complex
TC0500000289.mm.1	9.5	9.86	-1.29	0.023	0.3614	Ept1	ethanolaminephosphotransferase 1 (CDP-ethanolamine-specific)	Multiple_Complex
TC1000000566.mm.1	7.31	7.68	-1.29	0.0276	0.3737	Lrrc20	leucine rich repeat containing 20	Coding
TC1400001439.mm.1	13.09	13.46	-1.29	0.0289	0.3765	Fam107a	family with sequence similarity 107, member A; family with sequence similarity 107, member A (Fam107a), mRNA.	Multiple_Complex
TC0X00003098.mm.1	9.4	9.77	-1.29	0.0314	0.3829	Acsl4	acyl-CoA synthetase long-chain family member 4	Multiple_Complex
TC0900001348.mm.1	7.62	7.99	-1.29	0.0325	0.3845	Abhd14b	abhydrolase domain containing 14b	Coding
TC0800001392.mm.1	9.55	9.92	-1.29	0.0326	0.3845	Atmin	ATM interactor	Coding
TC0900001374.mm.1	7.56	7.93	-1.29	0.038	0.3943	Tusc2	tumor suppressor candidate 2	Coding
TC1200002584.mm.1	2.78	3.14	-1.29	0.0446	0.4046	Ighv9-3	immunoglobulin heavy variable V9-3	Coding
TC1400000895.mm.1	13.36	13.72	-1.28	0.0009	0.1784	Ctsb	cathepsin B	Coding
TC0900002106.mm.1	8.76	9.11	-1.28	0.0011	0.1912	Ubash3b	ubiquitin associated and SH3 domain containing, B	Multiple_Complex
TC0200003811.mm.1	10.35	10.7	-1.28	0.0012	0.1931	Sestd1	SEC14 and spectrin domains 1	Multiple_Complex
TC1600000218.mm.1	8.93	9.29	-1.28	0.0014	0.1992	Aifm3	apoptosis-inducing factor, mitochondrion-associated 3	Multiple_Complex
TC0800002471.mm.1	10.33	10.68	-1.28	0.0015	0.2003	Large	like-glycosyltransferase	Multiple_Complex
TC0300002371.mm.1	5.34	5.7	-1.28	0.0015	0.2026	Npr1	natriuretic peptide receptor 1	Multiple_Complex
TC0500001506.mm.1	6.1	6.45	-1.28	0.002	0.2194	Mmp17	matrix metallopeptidase 17	Multiple_Complex
TC0800001964.mm.1	5.47	5.82	-1.28	0.0022	0.2249	Unc5d	unc-5 homolog D (C. elegans)	Multiple_Complex
TC0100001752.mm.1	8.74	9.1	-1.28	0.0031	0.2406	Susd4	sushi domain containing 4	Multiple_Complex
TC0300001497.mm.1	12.23	12.59	-1.28	0.0034	0.2446	Ttll7	tubulin tyrosine ligase-like family, member 7 (Ttll7), mRNA.; tubulin tyrosine ligase-like family, member 7	Multiple_Complex
TC0500003212.mm.1	15.93	16.28	-1.28	0.004	0.2556	Atp2a2	ATPase, Ca++ transporting, cardiac muscle, slow twitch 2	Multiple_Complex
TC0X00002384.mm.1	12.65	13	-1.28	0.0041	0.2572	Ids	iduronate 2-sulfatase; Synthetic construct Mus musculus clone IMAGE:100063863, MGC:193330 iduronate 2-sulfatase (Ids) mRNA, encodes complete protein.	Coding
TC0100003568.mm.1	10.14	10.49	-1.28	0.0043	0.2581	Kcnj9	potassium inwardly-rectifying channel, subfamily J, member 9	Multiple_Complex
TC1000000547.mm.1	15.92	16.27	-1.28	0.0051	0.2621	Psap	prosaposin	Coding
TC0300002355.mm.1	8.52	8.87	-1.28	0.0052	0.2628	Chrnb2	cholinergic receptor, nicotinic, beta polypeptide 2 (neuronal)	Coding
TC0200004423.mm.1	7.89	8.25	-1.28	0.0057	0.2689	Rmdn3	regulator of microtubule dynamics 3	Multiple_Complex
TC0900001099.mm.1	7.69	8.04	-1.28	0.0112	0.312	Sh3bgrl2	SH3 domain binding glutamic acid-rich protein like 2	Multiple_Complex
TC1700000842.mm.1	12.78	13.14	-1.28	0.0118	0.3139	Enpp5	ectonucleotide pyrophosphatase/phosphodiesterase 5	Coding
TC0600001129.mm.1	9.01	9.37	-1.28	0.014	0.3274	Arl6ip5	ADP-ribosylation factor-like 6 interacting protein 5	Coding
TC0200001756.mm.1	5.55	5.9	-1.28	0.0147	0.3307	Rpusd2	RNA pseudouridylate synthase domain containing 2	Multiple_Complex
TC1100003532.mm.1	7.44	7.79	-1.28	0.0163	0.3368	Stxbp4	syntaxin binding protein 4	Multiple_Complex
TC0600001042.mm.1	7.64	8	-1.28	0.0175	0.3419	Tpra1	transmembrane protein, adipocyte asscociated 1	Multiple_Complex
TC0800001089.mm.1	10.12	10.48	-1.28	0.0178	0.3434	Ogfod1	2-oxoglutarate and iron-dependent oxygenase domain containing 1	Multiple_Complex
TC1500000139.mm.1	7.51	7.86	-1.28	0.0219	0.3585	Cdh12	cadherin 12	Coding
TC1100001706.mm.1	8.87	9.23	-1.28	0.0265	0.372	Hexim1	hexamethylene bis-acetamide inducible 1	Multiple_Complex
TC0500002651.mm.1	9.54	9.9	-1.28	0.0283	0.3749	Igfbp7	insulin-like growth factor binding protein 7	Coding
TC0500002411.mm.1	10.23	10.6	-1.28	0.0298	0.3787	Lgi2	leucine-rich repeat LGI family, member 2	Coding
TC0800002256.mm.1	9.12	9.47	-1.28	0.0352	0.3881	Galnt7	UDP-N-acetyl-alpha-D-galactosamine: polypeptide N-acetylgalactosaminyltransferase 7	Multiple_Complex
TC0X00002238.mm.1	8.38	8.74	-1.28	0.036	0.391	Mospd1	motile sperm domain containing 1	Coding
TC0900002387.mm.1	4.64	5	-1.28	0.0374	0.3932	Islr	immunoglobulin superfamily containing leucine-rich repeat	Coding
TC0300002959.mm.1	7.01	7.36	-1.28	0.0451	0.4055	Sgms2	sphingomyelin synthase 2	Multiple_Complex
TC0600001807.mm.1	5.32	5.67	-1.28	0.049	0.4113	Pon3	paraoxonase 3	Multiple_Complex
TC0600001394.mm.1	12.85	13.2	-1.27	0.0019	0.219	Necap1	NECAP endocytosis associated 1	Multiple_Complex
TC0400004117.mm.1	9.65	10	-1.27	0.0019	0.2194	Tprgl	transformation related protein 63 regulated like	Multiple_Complex
TC0700000988.mm.1	8.49	8.83	-1.27	0.0023	0.2286	Pcsk6	proprotein convertase subtilisin/kexin type 6	Multiple_Complex
TC1900001599.mm.1	9.22	9.56	-1.27	0.0024	0.2306	Psd	pleckstrin and Sec7 domain containing	Coding
TC0900000285.mm.1	8.69	9.03	-1.27	0.0026	0.2306	Arhgap32	Rho GTPase activating protein 32	Multiple_Complex
TC1700002438.mm.1	9.55	9.9	-1.27	0.0027	0.2323	Ptprm	protein tyrosine phosphatase, receptor type, M	Multiple_Complex
TC0300000580.mm.1	8.86	9.2	-1.27	0.0029	0.237	Ppm1l	protein phosphatase 1 (formerly 2C)-like	Multiple_Complex
TC1000003044.mm.1	9.01	9.36	-1.27	0.003	0.237	Tbc1d30	TBC1 domain family, member 30	Coding
TC0600001205.mm.1	12.87	13.22	-1.27	0.0033	0.2425	Arl8b	ADP-ribosylation factor-like 8B	Multiple_Complex
TC0300002122.mm.1	7.54	7.88	-1.27	0.0033	0.2425	Ift80	intraflagellar transport 80	Multiple_Complex
TC0700004661.mm.1	11.42	11.77	-1.27	0.0033	0.2426	Prrt2; Pagr1a	proline-rich transmembrane protein 2; PAXIP1 associated glutamate rich protein 1A	Multiple_Complex
TC1500000142.mm.1	10.75	11.1	-1.27	0.004	0.2556	Cdh18	cadherin 18	Multiple_Complex
TC1300001882.mm.1	12.16	12.51	-1.27	0.0042	0.2572	Ranbp9	RAN binding protein 9	Coding
TC0200004762.mm.1	9.67	10	-1.27	0.0045	0.2581	Dzank1	double zinc ribbon and ankyrin repeat domains 1	Multiple_Complex
TC0800002587.mm.1	11.92	12.27	-1.27	0.0045	0.2581	Nacc1	nucleus accumbens associated 1, BEN and BTB (POZ) domain containing	Multiple_Complex
TC0900002113.mm.1	14.41	14.75	-1.27	0.0045	0.2581	Sorl1	sortilin-related receptor, LDLR class A repeats-containing; Synthetic construct Mus musculus clone IMAGE:100069522, MGC:199424 sortilin-related receptor, LDLR class A repeats-containing (Sorl1) mRNA, encodes complete protein.	Multiple_Complex
TC1300000688.mm.1	5.97	6.32	-1.27	0.0047	0.2588	Fbxl21	F-box and leucine-rich repeat protein 21	Coding
TC1400002267.mm.1	4.85	5.19	-1.27	0.0055	0.2664	Ptk2b	PTK2 protein tyrosine kinase 2 beta	Multiple_Complex
TC0900002300.mm.1	7.17	7.51	-1.27	0.0069	0.2832	AI593442	expressed sequence AI593442	Multiple_Complex
TC0600003164.mm.1	6.93	7.28	-1.27	0.0074	0.2868	Kcna6	potassium voltage-gated channel, shaker-related, subfamily, member 6	Multiple_Complex
TC0100003058.mm.1	12.16	12.51	-1.27	0.0074	0.2868	Srgap2	SLIT-ROBO Rho GTPase activating protein 2; Synthetic construct Mus musculus clone IMAGE:100062157, MGC:190386 SLIT-ROBO Rho GTPase activating protein 2 (Srgap2) mRNA, encodes complete protein.	Coding
TC1900000600.mm.1	11.98	12.32	-1.27	0.0078	0.2873	Pgam1	phosphoglycerate mutase 1	Coding
TC1500001778.mm.1	10.57	10.92	-1.27	0.0078	0.2875	Scrt1	scratch homolog 1, zinc finger protein (Drosophila)	Coding
TC1200000740.mm.1	6.82	7.16	-1.27	0.0098	0.3028	Galnt16	UDP-N-acetyl-alpha-D-galactosamine:polypeptide N-acetylgalactosaminyltransferase 16	Multiple_Complex
TC1800001237.mm.1	7.3	7.64	-1.27	0.0104	0.3082	Fgf1	fibroblast growth factor 1	Multiple_Complex
TC0400003016.mm.1	8.97	9.31	-1.27	0.0116	0.3132	Klhl9	kelch-like 9	Coding
TC1300001522.mm.1	8.9	9.25	-1.27	0.0117	0.3139	Epdr1	ependymin related protein 1 (zebrafish); ependymin related protein 1 (zebrafish) (Epdr1), mRNA.	Coding
TC0200004563.mm.1	10.74	11.08	-1.27	0.0125	0.3192	Mal	myelin and lymphocyte protein, T cell differentiation protein	Coding
TC0600003383.mm.1	9.19	9.53	-1.27	0.016	0.3351	St8sia1	ST8 alpha-N-acetyl-neuraminide alpha-2,8-sialyltransferase 1	Multiple_Complex
TC0100000678.mm.1	11.49	11.83	-1.27	0.017	0.3406	Sgpp2	sphingosine-1-phosphate phosphotase 2	Coding
TC1600002177.mm.1	8.53	8.88	-1.27	0.0181	0.3455	Dexi	dexamethasone-induced transcript	Multiple_Complex
TC1300002468.mm.1	9.32	9.67	-1.27	0.0206	0.3551	Sv2c	synaptic vesicle glycoprotein 2c	Multiple_Complex
TC0500003024.mm.1	9.92	10.26	-1.27	0.0209	0.3556	Adrbk2	adrenergic receptor kinase, beta 2; Synthetic construct Mus musculus clone IMAGE:100016278, MGC:184491 adrenergic receptor kinase, beta 2 (Adrbk2) mRNA, encodes complete protein.; adrenergic receptor kinase, beta 2 (Adrbk2), transcript variant 1, mRNA.; adrenergic receptor kinase, beta 2 (Adrbk2), transcript variant 2, mRNA.	Multiple_Complex
TC0600002783.mm.1	6.31	6.66	-1.27	0.0248	0.3664	Suclg2	succinate-Coenzyme A ligase, GDP-forming, beta subunit; succinate-Coenzyme A ligase, GDP-forming, beta subunit (Suclg2), nuclear gene encoding mitochondrial protein, mRNA.	Coding
TC0600003533.mm.1	7.38	7.73	-1.27	0.0263	0.3718	Ttll3	tubulin tyrosine ligase-like family, member 3	Multiple_Complex
TC1900001359.mm.1	9.56	9.9	-1.27	0.0286	0.3759	Ppp1r2-ps3	protein phosphatase 1, regulatory (inhibitor) subunit 2, pseudogene 3	Multiple_Complex
TC0800000691.mm.1	8.65	8.99	-1.27	0.0291	0.3768	Naf1	nuclear assembly factor 1 homolog (S. cerevisiae)	Coding
TC1600001398.mm.1	6.87	7.22	-1.27	0.032	0.3838	Sst	somatostatin	Coding
TC0300000865.mm.1	6.43	6.78	-1.27	0.037	0.3932	Lingo4	leucine rich repeat and Ig domain containing 4	Coding
TC0700004571.mm.1	7.83	8.18	-1.27	0.0419	0.4024	Igf2	insulin-like growth factor 2	Multiple_Complex
TC1100003775.mm.1	8.66	9	-1.26	0.0017	0.2114	Acly	ATP citrate lyase	Multiple_Complex
TC0X00000151.mm.1	12.35	12.68	-1.26	0.002	0.2194	Atp6ap2	ATPase, H+ transporting, lysosomal accessory protein 2	Multiple_Complex
TC0900000139.mm.1	3.4	3.73	-1.26	0.002	0.2194	Olfr829	olfactory receptor 829; Synthetic construct Mus musculus clone IMAGE:100014829, MGC:180285 olfactory receptor 829 (Olfr829) mRNA, encodes complete protein.	Coding
TC1400000747.mm.1	6.38	6.71	-1.26	0.0021	0.2215	Lrp10	low-density lipoprotein receptor-related protein 10	Coding
TC0900001398.mm.1	10.24	10.58	-1.26	0.0024	0.2306	Nicn1	nicolin 1	Coding
TC1500000008.mm.1	12.25	12.59	-1.26	0.0027	0.2315	Oxct1	3-oxoacid CoA transferase 1	Multiple_Complex
TC0400002075.mm.1	5.34	5.68	-1.26	0.0031	0.2403	Cfap74; C030017K20Rik	cilia and flagella associated protein 74; RIKEN cDNA C030017K20 gene	Multiple_Complex
TC0600002996.mm.1	6.35	6.68	-1.26	0.0033	0.2434	Ret	ret proto-oncogene	Multiple_Complex
TC1200000427.mm.1	13.45	13.78	-1.26	0.0034	0.2469	Arhgap5	Rho GTPase activating protein 5	Multiple_Complex
TC1100003064.mm.1	7.72	8.05	-1.26	0.0038	0.2524	Fgf11	fibroblast growth factor 11	Multiple_Complex
TC0100000101.mm.1	9.17	9.5	-1.26	0.0038	0.2523	Tmem70	transmembrane protein 70	Multiple_Complex
TC0900003050.mm.1	9.23	9.56	-1.26	0.0045	0.2581	Rnf123	ring finger protein 123; ring finger protein 123 (Rnf123), mRNA.	Multiple_Complex
TC0500003626.mm.1	7.74	8.07	-1.26	0.0046	0.2581	Flt3	FMS-like tyrosine kinase 3; Synthetic construct Mus musculus clone IMAGE:100064035, MGC:193406 FMS-like tyrosine kinase 3 (Flt3) mRNA, encodes complete protein.	Coding
TC0500001995.mm.1	13.07	13.4	-1.26	0.0048	0.2602	Gnai1	guanine nucleotide binding protein (G protein), alpha inhibiting 1	Multiple_Complex
TC1600002080.mm.1	11.22	11.56	-1.26	0.0056	0.2674	Tmem50b	transmembrane protein 50B	Coding
TC1000002943.mm.1	9.99	10.33	-1.26	0.0059	0.2722	Slc35e3	solute carrier family 35, member E3	Coding
TC1100003511.mm.1	9.3	9.64	-1.26	0.006	0.2744	Dgke	diacylglycerol kinase, epsilon; Synthetic construct Mus musculus clone IMAGE:100015756, MGC:183424 diacylglycerol kinase, epsilon (Dgke) mRNA, encodes complete protein.	Multiple_Complex
TC1100002015.mm.1	8.09	8.42	-1.26	0.0063	0.2774	Baiap2	brain-specific angiogenesis inhibitor 1-associated protein 2	Multiple_Complex
TC1900000317.mm.1	9.38	9.71	-1.26	0.0064	0.2793	Rfk	riboflavin kinase	Multiple_Complex
TC1500001040.mm.1	7.75	8.08	-1.26	0.007	0.2842	Mettl7a1	methyltransferase like 7A1	Coding
TC1500000974.mm.1	4.32	4.64	-1.26	0.0071	0.2854	Olfr282	olfactory receptor 282; Synthetic construct Mus musculus clone IMAGE:100016371, MGC:184526 olfactory receptor 282 (Olfr282) mRNA, encodes complete protein.	Coding
TC0500001531.mm.1	11.18	11.51	-1.26	0.0076	0.2873	Caln1	calneuron 1	Multiple_Complex
TC1100003236.mm.1	8.33	8.66	-1.26	0.0082	0.2917	Fam101b	family with sequence similarity 101, member B	Multiple_Complex
TC0700001494.mm.1	3.72	4.05	-1.26	0.0084	0.2938	Olfr606	olfactory receptor 606	Coding
TC1400002740.mm.1	12.41	12.75	-1.26	0.009	0.2995	Dock9	dedicator of cytokinesis 9; Synthetic construct Mus musculus clone IMAGE:100068373, MGC:195917 dedicator of cytokinesis 9 (Dock9) mRNA, encodes complete protein.	Coding
TC0700004404.mm.1	7.68	8.01	-1.26	0.01	0.3039	Chst15	carbohydrate (N-acetylgalactosamine 4-sulfate 6-O) sulfotransferase 15	Multiple_Complex
TC1100000822.mm.1	8.61	8.95	-1.26	0.0102	0.3066	Pmp22	peripheral myelin protein 22	Multiple_Complex
TC1900000427.mm.1	11.15	11.48	-1.26	0.0133	0.3242	Plpp6	phospholipid phosphatase 6	Coding
TC1700000419.mm.1	9.62	9.95	-1.26	0.0138	0.3274	Crebrf	CREB3 regulatory factor	Multiple_Complex
TC1900001425.mm.1	4.61	4.94	-1.26	0.0148	0.3307	Slc16a12	solute carrier family 16 (monocarboxylic acid transporters), member 12	Coding
TC0300001260.mm.1	6.69	7.02	-1.26	0.015	0.3328	Tram1l1	translocation associated membrane protein 1-like 1	Coding
TC0X00000110.mm.1	8.72	9.05	-1.26	0.015	0.3328	Xk	Kell blood group precursor (McLeod phenotype) homolog	Coding
TC1700000819.mm.1	8.65	8.98	-1.26	0.0154	0.3329	Mut	methylmalonyl-Coenzyme A mutase	Coding
TC1700001857.mm.1	6.32	6.65	-1.26	0.0167	0.3389	Cyp4f13	cytochrome P450, family 4, subfamily f, polypeptide 13	Multiple_Complex
TC0700004165.mm.1	12.49	12.82	-1.26	0.0179	0.344	Arl6ip1	ADP-ribosylation factor-like 6 interacting protein 1	Coding
TC0300002489.mm.1	6.49	6.83	-1.26	0.019	0.3478	Ciart	circadian associated repressor of transcription	Coding
TC0300002370.mm.1	8.2	8.53	-1.26	0.0208	0.3554	Ints3	integrator complex subunit 3	Coding
TC1500001339.mm.1	8.09	8.42	-1.26	0.0219	0.3585	Tspyl5	testis-specific protein, Y-encoded-like 5	Coding
TC0400004097.mm.1	6.44	6.78	-1.26	0.0255	0.3688	Kcnab2	potassium voltage-gated channel, shaker-related subfamily, beta member 2	Multiple_Complex
TC0100001114.mm.1	8.88	9.21	-1.26	0.0256	0.3688	Mgat5	mannoside acetylglucosaminyltransferase 5	Coding
TC1800000356.mm.1	4.07	4.41	-1.26	0.0278	0.3747	Pcdhb2	protocadherin beta 2	Coding
TC1700001604.mm.1	8.95	9.28	-1.26	0.0283	0.3749	Flywch1	FLYWCH-type zinc finger 1	Coding
TC0X00000801.mm.1	12.18	12.51	-1.26	0.0315	0.383	Tmem47	transmembrane protein 47	Multiple_Complex
TC1900000335.mm.1	11.73	12.06	-1.26	0.035	0.388	Aldh1a1	aldehyde dehydrogenase family 1, subfamily A1	Coding
TC0X00001800.mm.1	11.86	12.19	-1.25	0.0022	0.2244	Porcn	porcupine homolog (Drosophila)	Multiple_Complex
TC1600001114.mm.1	8.78	9.11	-1.25	0.0023	0.2252	Trap1	TNF receptor-associated protein 1	Multiple_Complex
TC0100000524.mm.1	12.38	12.71	-1.25	0.0024	0.2306	Adam23	a disintegrin and metallopeptidase domain 23 (Adam23), transcript variant 1, mRNA.; a disintegrin and metallopeptidase domain 23	Multiple_Complex
TC1500000875.mm.1	11.02	11.34	-1.25	0.0029	0.237	Mapk8ip2	mitogen-activated protein kinase 8 interacting protein 2	Coding
TC1500000478.mm.1	10.55	10.88	-1.25	0.0035	0.2475	Efr3a	EFR3 homolog A (S. cerevisiae)	Multiple_Complex
TC0200003318.mm.1	10.36	10.68	-1.25	0.0037	0.2504	Garnl3	GTPase activating RANGAP domain-like 3	Multiple_Complex
TC0200005430.mm.1	7.79	8.12	-1.25	0.0046	0.2581	Kcnq2	potassium voltage-gated channel, subfamily Q, member 2; potassium voltage-gated channel, subfamily Q, member 2 (Kcnq2), transcript variant 7, mRNA.; potassium voltage-gated channel, subfamily Q, member 2 (Kcnq2), transcript variant 8, mRNA.; potassium voltage-gated channel, subfamily Q, member 2 (Kcnq2), transcript variant 9, mRNA.; potassium voltage-gated channel, subfamily Q, member 2 (Kcnq2), …	Multiple_Complex
TC0800002953.mm.1	10.22	10.55	-1.25	0.005	0.2607	Bcar1	breast cancer anti-estrogen resistance 1	Coding
TC0400000213.mm.1	7.6	7.92	-1.25	0.0051	0.2615	Gpr63	G protein-coupled receptor 63; Synthetic construct Mus musculus clone IMAGE:100063913, MGC:193380 G protein-coupled receptor 63 (Gpr63) mRNA, encodes complete protein.	Multiple_Complex
TC0500000710.mm.1	10.52	10.84	-1.25	0.0056	0.2683	Kit	kit oncogene	Multiple_Complex
TC1400001327.mm.1	11.65	11.97	-1.25	0.0058	0.2695	Tm9sf2	transmembrane 9 superfamily member 2	Coding
TC1800000300.mm.1	11.42	11.74	-1.25	0.0065	0.2794	Reep2	receptor accessory protein 2	Coding
TC0200001674.mm.1	11.75	12.07	-1.25	0.0069	0.2835	Emc7	ER membrane protein complex subunit 7	Multiple_Complex
TC1100001564.mm.1	7.36	7.68	-1.25	0.0069	0.2832	Ppp1r1b	protein phosphatase 1, regulatory (inhibitor) subunit 1B	Multiple_Complex
TC1400000797.mm.1	7.73	8.05	-1.25	0.007	0.2849	Khnyn	KH and NYN domain containing	Multiple_Complex
TC1400002473.mm.1	12.53	12.86	-1.25	0.0074	0.2868	Akap11	A kinase (PRKA) anchor protein 11	Multiple_Complex
TC1200001886.mm.1	11.68	12.01	-1.25	0.0076	0.2873	Trim9	tripartite motif-containing 9	Multiple_Complex
TC1600002060.mm.1	11.26	11.58	-1.25	0.0096	0.3013	Synj1	synaptojanin 1	Multiple_Complex
TC0200002398.mm.1	8.71	9.02	-1.25	0.0103	0.3076	Dlgap4	discs, large homolog-associated protein 4 (Drosophila)	Multiple_Complex
TC0600001787.mm.1	4.58	4.91	-1.25	0.0105	0.3085	Samd9l	sterile alpha motif domain containing 9-like	Coding
TC0200005186.mm.1	10.65	10.98	-1.25	0.0106	0.3085	B4galt5	UDP-Gal:betaGlcNAc beta 1,4-galactosyltransferase, polypeptide 5	Multiple_Complex
TC0600003128.mm.1	9.31	9.63	-1.25	0.0115	0.3129	Cops7a	COP9 (constitutive photomorphogenic) homolog, subunit 7a (Arabidopsis thaliana)	Multiple_Complex
TC1800000266.mm.1	14.59	14.91	-1.25	0.0123	0.3179	Camk4	calcium/calmodulin-dependent protein kinase IV	Multiple_Complex
TC0800002008.mm.1	7.79	8.12	-1.25	0.0123	0.3177	Ubxn8	UBX domain protein 8	Coding
TC0100003754.mm.1	6.64	6.96	-1.25	0.0135	0.3256	Tgfb2	transforming growth factor, beta 2	Coding
TC1600000480.mm.1	8.94	9.26	-1.25	0.0136	0.3267	Itgb5	integrin beta 5	Multiple_Complex
TC0100000103.mm.1	6.23	6.55	-1.25	0.0153	0.3329	Ly96	lymphocyte antigen 96	Coding
TC0200005502.mm.1	10.81	11.13	-1.25	0.0168	0.3396	Ttbk2	tau tubulin kinase 2; Synthetic construct Mus musculus clone IMAGE:100068369, MGC:195913 tau tubulin kinase 2 (Ttbk2) mRNA, encodes complete protein.	Multiple_Complex
TC0300002071.mm.1	6.33	6.64	-1.25	0.0175	0.3416	Plch1	phospholipase C, eta 1; phospholipase C, eta 1 (Plch1), transcript variant 1, mRNA.	Multiple_Complex
TC0600001926.mm.1	5.61	5.93	-1.25	0.0177	0.3432	Aass	aminoadipate-semialdehyde synthase	Multiple_Complex
TC0600002044.mm.1	7.62	7.94	-1.25	0.0188	0.3478	Slc35b4	solute carrier family 35, member B4	Multiple_Complex
TC1400000656.mm.1	5.79	6.12	-1.25	0.0196	0.3501	Trav13d-4	T cell receptor alpha variable 13D-4	Coding
TC0800001112.mm.1	8.56	8.89	-1.25	0.0201	0.3522	Cpne2	copine II	Multiple_Complex
TC0600001027.mm.1	11.03	11.35	-1.25	0.0212	0.356	Rpn1	ribophorin I	Coding
TC1200001263.mm.1	6.93	7.24	-1.25	0.022	0.3585	Siva1	SIVA1, apoptosis-inducing factor	Coding
TC0900002328.mm.1	4.4	4.72	-1.25	0.0227	0.3608	Chrnb4	cholinergic receptor, nicotinic, beta polypeptide 4; Synthetic construct Mus musculus clone IMAGE:100062851, MGC:190975 cholinergic receptor, nicotinic, beta polypeptide 4 (Chrnb4) mRNA, encodes complete protein.	Coding
TC1400001788.mm.1	4.12	4.44	-1.25	0.0235	0.363	Dydc2	DPY30 domain containing 2	Coding
TC0600001867.mm.1	7.79	8.11	-1.25	0.0258	0.3702	Thsd7a	thrombospondin, type I, domain containing 7A	Multiple_Complex
TC0800000345.mm.1	8.08	8.4	-1.25	0.0344	0.3875	Erlin2	ER lipid raft associated 2	Coding
TC0900000674.mm.1	9.27	9.59	-1.25	0.0408	0.4001	Tmem266	transmembrane protein 266	Multiple_Complex
TC0700004565.mm.1	8.93	9.25	-1.25	0.0416	0.4017	Ctsd; Ifitm10	cathepsin D; interferon induced transmembrane protein 10	Multiple_Complex
TC0700002165.mm.1	5.44	5.76	-1.25	0.0451	0.4055	Tmem86b	transmembrane protein 86B	Coding
TC1000000543.mm.1	12.61	12.92	-1.24	0.0025	0.2306	Spock2	sparc/osteonectin, cwcv and kazal-like domains proteoglycan 2	Multiple_Complex
TC0600003107.mm.1	11.16	11.47	-1.24	0.0029	0.237	Clstn3	calsyntenin 3	Multiple_Complex
TC1000000794.mm.1	11.78	12.09	-1.24	0.0032	0.2425	Slc1a6	solute carrier family 1 (high affinity aspartate/glutamate transporter), member 6	Coding
TC1400001785.mm.1	8.99	9.31	-1.24	0.0042	0.2572	Fam213a	family with sequence similarity 213, member A	Multiple_Complex
TC0X00001024.mm.1	8.84	9.15	-1.24	0.0047	0.2581	Chic1	cysteine-rich hydrophobic domain 1	Multiple_Complex
TC1800001469.mm.1	5.44	5.75	-1.24	0.0049	0.2607	Alpk2	alpha-kinase 2	Multiple_Complex
TC0700000908.mm.1	7.79	8.1	-1.24	0.005	0.2607	Nell1	NEL-like 1; Synthetic construct Mus musculus clone IMAGE:100063563, MGC:191109 NEL-like 1 (chicken) (Nell1) mRNA, encodes complete protein.	Multiple_Complex
TC0200002032.mm.1	12.63	12.94	-1.24	0.0052	0.2628	Cds2	CDP-diacylglycerol synthase (phosphatidate cytidylyltransferase) 2	Multiple_Complex
TC1100003882.mm.1	12.3	12.61	-1.24	0.0054	0.2655	Nsf	N-ethylmaleimide sensitive fusion protein	Multiple_Complex
TC0500000201.mm.1	9.14	9.45	-1.24	0.0056	0.2664	Klhl7	kelch-like 7	Multiple_Complex
TC1100000880.mm.1	10.86	11.16	-1.24	0.0058	0.2708	Myh10	myosin, heavy polypeptide 10, non-muscle	Multiple_Complex
TC0200002275.mm.1	8.95	9.26	-1.24	0.0063	0.2778	Srxn1	sulfiredoxin 1 homolog (S. cerevisiae)	Multiple_Complex
TC1700002075.mm.1	3.81	4.12	-1.24	0.0064	0.279	Olfr114	olfactory receptor 114	Coding
TC0300002450.mm.1	5.63	5.94	-1.24	0.0071	0.2854	Tuft1	tuftelin 1	Multiple_Complex
TC0700001391.mm.1	10.69	11	-1.24	0.0073	0.2862	Arrb1	arrestin, beta 1	Multiple_Complex
TC1000001207.mm.1	6	6.31	-1.24	0.0077	0.2873	Dusp6	dual specificity phosphatase 6	Coding
TSUnmapped00000029.mm.1	12.73	13.04	-1.24	0.0079	0.2875	Psd3	pleckstrin and Sec7 domain containing 3	Coding
TC0800001875.mm.1	8.81	9.12	-1.24	0.0094	0.3011	Ap3m2	adaptor-related protein complex 3, mu 2 subunit	Coding
TC1900001754.mm.1	9.92	10.23	-1.24	0.0098	0.3028	Prdx3	peroxiredoxin 3	Coding
TC1100001012.mm.1	7.89	8.19	-1.24	0.0106	0.3085	Camkk1	calcium/calmodulin-dependent protein kinase kinase 1, alpha	Multiple_Complex
TC1100003069.mm.1	10.46	10.77	-1.24	0.0109	0.3095	Nlgn2	neuroligin 2; Synthetic construct Mus musculus clone IMAGE:100063645, MGC:191105 neuroligin 2 (Nlgn2) mRNA, encodes complete protein.	Multiple_Complex
TC0700001264.mm.1	6.57	6.88	-1.24	0.0111	0.3114	Fzd4	frizzled homolog 4 (Drosophila)	Coding
TC0700000861.mm.1	7.68	7.99	-1.24	0.0134	0.3247	Dbp	D site albumin promoter binding protein	Multiple_Complex
TC1200001023.mm.1	9.64	9.95	-1.24	0.014	0.3274	Unc79	unc-79 homolog (C. elegans)	Multiple_Complex
TC1600001019.mm.1	8.21	8.52	-1.24	0.0141	0.3274	Slc5a3; Mrps6	solute carrier family 5 (inositol transporters), member 3; mitochondrial ribosomal protein S6	Multiple_Complex
TC0800000384.mm.1	10.3	10.61	-1.24	0.0151	0.3329	Purg	purine-rich element binding protein G	Coding
TC1100000943.mm.1	6.71	7.01	-1.24	0.0153	0.3329	Slc16a11	solute carrier family 16 (monocarboxylic acid transporters), member 11	Multiple_Complex
TC0200000549.mm.1	9.11	9.42	-1.24	0.0164	0.3372	Ncs1	neuronal calcium sensor 1	Multiple_Complex
TC1400000962.mm.1	7.94	8.25	-1.24	0.0168	0.3396	Kctd9	potassium channel tetramerisation domain containing 9	Coding
TC0800002552.mm.1	8.19	8.5	-1.24	0.0178	0.3437	Scoc	short coiled-coil protein; short coiled-coil protein (Scoc), transcript variant 2, mRNA.	Multiple_Complex
TC0400003230.mm.1	6.24	6.55	-1.24	0.0256	0.3693	Cpt2	carnitine palmitoyltransferase 2	Multiple_Complex
TC1500001062.mm.1	9.33	9.64	-1.24	0.033	0.3863	Acvr1b	activin A receptor, type 1B	Multiple_Complex
TC0300000211.mm.1	11.5	11.82	-1.24	0.0331	0.3865	Cldn11	claudin 11	Coding
TC0200000819.mm.1	6.85	7.16	-1.24	0.0335	0.3871	Tnfaip6	tumor necrosis factor alpha induced protein 6	Coding
TC0700003057.mm.1	3.29	3.6	-1.24	0.0361	0.3911	Mrgpra2a	MAS-related GPR, member A2A	Coding
TC0600002505.mm.1	5.64	5.96	-1.24	0.0433	0.4043	Dnah6	dynein, axonemal, heavy chain 6	Coding
TC1700000775.mm.1	3.44	3.74	-1.24	0.0473	0.4092	Olfr110	olfactory receptor 110	Coding
TC1500000074.mm.1	5.85	6.16	-1.24	0.0484	0.4111	Capsl	calcyphosine-like; Synthetic construct Mus musculus clone IMAGE:100062538, MGC:190908 calcyphosine-like (Capsl) mRNA, encodes complete protein.	Coding
TC1100003538.mm.1	7.86	8.17	-1.24	0.0494	0.4115	Tom1l1	target of myb1-like 1 (chicken)	Multiple_Complex
TC0900001367.mm.1	10.44	10.74	-1.23	0.0028	0.2351	Cacna2d2	calcium channel, voltage-dependent, alpha 2/delta subunit 2	Multiple_Complex
TC0300001112.mm.1	11.56	11.85	-1.23	0.0028	0.237	Kcna2	potassium voltage-gated channel, shaker-related subfamily, member 2	Multiple_Complex
TC1100001721.mm.1	5.61	5.91	-1.23	0.0035	0.2469	Wnt3	wingless-type MMTV integration site family, member 3; wingless-related MMTV integration site 3	Coding
TC0600003074.mm.1	9.08	9.38	-1.23	0.004	0.2556	Slc2a3	solute carrier family 2 (facilitated glucose transporter), member 3	Multiple_Complex
TC0400004177.mm.1	7.08	7.39	-1.23	0.0043	0.2581	Akap2	A kinase (PRKA) anchor protein 2	Multiple_Complex
TC0200003873.mm.1	12.28	12.59	-1.23	0.0045	0.2581	Tmx2	thioredoxin-related transmembrane protein 2	Multiple_Complex
TC1800001740.mm.1	6.16	6.46	-1.23	0.0055	0.2664	Pcdhac1; Pcdhac2; Pcdha4; Pcdha6; Pcdha7; Pcdha5; Pcdha11; Pcdha10; Pcdha1; Pcdha9; Pcdha3; Pcdha12; Pcdha2; Pcdha8; Gm37013	protocadherin alpha subfamily C, 1; protocadherin alpha subfamily C, 2; protocadherin alpha 4; protocadherin alpha 6; protocadherin alpha 7; protocadherin alpha 5; protocadherin alpha 11; protocadherin alpha 10; protocadherin alpha 1; protocadherin alpha 9; protocadherin alpha 3; protocadherin alpha 12; protocadherin alpha 2; protocadherin alpha 8; predicted gene, 37013; Synthetic construct Mus m…	Coding
TC0700004622.mm.1	7.57	7.86	-1.23	0.0077	0.2873	Tm2d3	TM2 domain containing 3	Multiple_Complex
TC1900001562.mm.1	13.88	14.17	-1.23	0.0078	0.2875	Scd1	stearoyl-Coenzyme A desaturase 1	Multiple_Complex
TC0X00002085.mm.1	11.22	11.52	-1.23	0.009	0.2995	Lamp2	lysosomal-associated membrane protein 2	Multiple_Complex
TC0800000756.mm.1	5.92	6.21	-1.23	0.0101	0.305	Isyna1	myo-inositol 1-phosphate synthase A1	Coding
TC1000001605.mm.1	8.15	8.46	-1.23	0.0102	0.3068	Rnf41	ring finger protein 41; ring finger protein 41 (Rnf41), transcript variant 1, mRNA.	Multiple_Complex
TC1100000344.mm.1	10.02	10.31	-1.23	0.0105	0.3085	Fbxw11	F-box and WD-40 domain protein 11; F-box and WD-40 domain protein 11 (Fbxw11), mRNA.	Multiple_Complex
TC0200004352.mm.1	8.85	9.14	-1.23	0.0107	0.3087	Emc4	ER membrane protein complex subunit 4	Multiple_Complex
TC0100000558.mm.1	12.94	13.25	-1.23	0.0112	0.3116	Unc80	unc-80 homolog (C. elegans)	Multiple_Complex
TC1500001973.mm.1	7.57	7.86	-1.23	0.0125	0.3192	Pacsin2	protein kinase C and casein kinase substrate in neurons 2	Coding
TC1200002311.mm.1	9.27	9.57	-1.23	0.0127	0.3204	Atg2b	autophagy related 2B	Multiple_Complex
TC0700002754.mm.1	6.88	7.18	-1.23	0.0131	0.3235	Lrfn3	leucine rich repeat and fibronectin type III domain containing 3	Coding
TC0800000916.mm.1	11.09	11.4	-1.23	0.0134	0.3247	Tbc1d9	TBC1 domain family, member 9	Multiple_Complex
TC0200003533.mm.1	12.53	12.83	-1.23	0.0148	0.3307	Cacnb4	calcium channel, voltage-dependent, beta 4 subunit	Multiple_Complex
TC0100002499.mm.1	9.98	10.28	-1.23	0.0158	0.3348	Lancl1	LanC (bacterial lantibiotic synthetase component C)-like 1	Multiple_Complex
TC1400000742.mm.1	7.37	7.66	-1.23	0.0192	0.3487	Abhd4	abhydrolase domain containing 4	Coding
TC0600002635.mm.1	9.21	9.51	-1.23	0.0205	0.3545	Pcyox1	prenylcysteine oxidase 1	Multiple_Complex
TC0700001432.mm.1	7.62	7.93	-1.23	0.0224	0.3602	Pde2a	phosphodiesterase 2A, cGMP-stimulated	Coding
TC0900002738.mm.1	11.98	12.28	-1.23	0.0242	0.3653	Tmem30a	transmembrane protein 30A	Multiple_Complex
TC0X00003260.mm.1	15.35	15.65	-1.23	0.0278	0.3746	Cnksr2	connector enhancer of kinase suppressor of Ras 2	Multiple_Complex
TC1700002150.mm.1	9.36	9.66	-1.23	0.0294	0.3776	Tmem151b	transmembrane protein 151B	Multiple_Complex
TC1700000839.mm.1	10.11	10.41	-1.23	0.0306	0.3802	Rcan2	regulator of calcineurin 2	Coding
TC1700002348.mm.1	14.06	14.36	-1.23	0.0326	0.3845	Tubb4a	tubulin, beta 4A class IVA	Coding
TC0X00002407.mm.1	6.55	6.86	-1.23	0.036	0.391	Gabra3	gamma-aminobutyric acid (GABA) A receptor, subunit alpha 3	Multiple_Complex
TC1300002198.mm.1	7.63	7.92	-1.23	0.0384	0.3959	Cdc14b	CDC14 cell division cycle 14B	Multiple_Complex
TC1500001465.mm.1	8.21	8.5	-1.23	0.0398	0.3986	Nudcd1	NudC domain containing 1	Multiple_Complex
TC0500000499.mm.1	5.35	5.65	-1.23	0.04	0.3988	Slit2	slit homolog 2 (Drosophila)	Multiple_Complex
TC0500000690.mm.1	5.19	5.48	-1.23	0.04	0.3988	Spata18	spermatogenesis associated 18	Coding
TC1500000300.mm.1	6.77	7.07	-1.23	0.0404	0.3994	Cthrc1	collagen triple helix repeat containing 1	Multiple_Complex
TC1400001869.mm.1	4.05	4.35	-1.23	0.045	0.4053	Ear-ps12	eosinophil-associated, ribonuclease A family, pseudogene 12	Multiple_Complex
TC1300002055.mm.1	8.77	9.06	-1.22	0.0032	0.2419	Lman2	lectin, mannose-binding 2	Multiple_Complex
TC1100000109.mm.1	14.61	14.89	-1.22	0.0036	0.249	Adcy1	adenylate cyclase 1; Synthetic construct Mus musculus clone IMAGE:100069519, MGC:199421 adenylate cyclase 1 (Adcy1) mRNA, encodes complete protein.	Multiple_Complex
TC0900000621.mm.1	9.82	10.11	-1.22	0.0037	0.2504	Arhgap20	Rho GTPase activating protein 20	Multiple_Complex
TC1400000198.mm.1	9.58	9.87	-1.22	0.004	0.2556	Samd8	sterile alpha motif domain containing 8	Multiple_Complex
TC1100002598.mm.1	12.96	13.25	-1.22	0.0047	0.2581	Cyfip2	cytoplasmic FMR1 interacting protein 2	Multiple_Complex
TC1400000854.mm.1	8.19	8.48	-1.22	0.0053	0.2645	Mipep	mitochondrial intermediate peptidase	Multiple_Complex
TC0500000868.mm.1	10.64	10.93	-1.22	0.0053	0.2643	Uso1	USO1 vesicle docking factor	Coding
TC1600001319.mm.1	11.55	11.85	-1.22	0.0054	0.2664	Gp1bb; Sept5	glycoprotein Ib, beta polypeptide; septin 5	Coding
TC0200003529.mm.1	5.91	6.2	-1.22	0.0056	0.2664	Neb	nebulin	Multiple_Complex
TC1900000042.mm.1	11.78	12.06	-1.22	0.0058	0.2708	Sptbn2	spectrin beta, non-erythrocytic 2	Coding
TC0400001514.mm.1	9.9	10.19	-1.22	0.0059	0.2717	Fndc5	fibronectin type III domain containing 5	Coding
TC0100002332.mm.1	9.59	9.89	-1.22	0.006	0.2735	Pms1	postmeiotic segregation increased 1 (S. cerevisiae)	Multiple_Complex
TC1800000094.mm.1	7.11	7.4	-1.22	0.0063	0.2774	Cables1	CDK5 and Abl enzyme substrate 1	Coding
TC0200000801.mm.1	13.62	13.9	-1.22	0.0063	0.2774	Kif5c	kinesin family member 5C	Multiple_Complex
TC1100003688.mm.1	10.67	10.95	-1.22	0.0069	0.2833	Nr1d1	nuclear receptor subfamily 1, group D, member 1	Multiple_Complex
TC1700000754.mm.1	13.15	13.44	-1.22	0.0071	0.2854	Gabbr1	gamma-aminobutyric acid (GABA) B receptor, 1	Multiple_Complex
TC0700001644.mm.1	11.6	11.89	-1.22	0.0078	0.2875	Mical2	microtubule associated monooxygenase, calponin and LIM domain containing 2	Multiple_Complex
TC0500003726.mm.1	9.07	9.35	-1.22	0.0078	0.2875	Prr14l	proline rich 14-like	Multiple_Complex
TC1300000072.mm.1	7.71	8	-1.22	0.0083	0.2935	Ero1lb	ERO1-like beta (S. cerevisiae)	Coding
TC0500000860.mm.1	8.51	8.8	-1.22	0.0086	0.2955	Parm1	prostate androgen-regulated mucin-like protein 1	Multiple_Complex
TC1400000248.mm.1	5.1	5.39	-1.22	0.0088	0.2979	Anxa11	annexin A11	Multiple_Complex
TC1100003041.mm.1	8.32	8.61	-1.22	0.0096	0.3013	Cyb5d1	cytochrome b5 domain containing 1	Multiple_Complex
TC1400002105.mm.1	14.08	14.37	-1.22	0.011	0.3113	Cbln3	cerebellin 3 precursor protein	Coding
TC1000001947.mm.1	8.77	9.06	-1.22	0.011	0.3109	Ncoa7	nuclear receptor coactivator 7; Synthetic construct Mus musculus clone IMAGE:100064038, MGC:193409 nuclear receptor coactivator 7 (Ncoa7) mRNA, encodes complete protein.	Multiple_Complex
TC1200001813.mm.1	9.97	10.26	-1.22	0.0111	0.3114	Sec23a	SEC23 homolog A, COPII coat complex component; SEC23A (S. cerevisiae)	Multiple_Complex
TC0400003702.mm.1	7.45	7.73	-1.22	0.0112	0.3116	Trnp1	TMF1-regulated nuclear protein 1	Multiple_Complex
TC1700000389.mm.1	12.28	12.56	-1.22	0.0113	0.3129	Fbxl16	F-box and leucine-rich repeat protein 16	Coding
TC1100004115.mm.1	7.75	8.04	-1.22	0.0116	0.3131	Foxj1; Rnf157	forkhead box J1; ring finger protein 157	Multiple_Complex
TC1600001130.mm.1	5.89	6.17	-1.22	0.0116	0.3132	Srl	sarcalumenin	Multiple_Complex
TC1500000041.mm.1	10.86	11.15	-1.22	0.0119	0.3153	Rictor	RPTOR independent companion of MTOR, complex 2	Multiple_Complex
TC1200001239.mm.1	10.93	11.21	-1.22	0.0121	0.3163	Eif5; Snora28	eukaryotic translation initiation factor 5; small nucleolar RNA, H/ACA box 28	Multiple_Complex
TC0100003108.mm.1	10.15	10.44	-1.22	0.0121	0.3165	Tmem183a	transmembrane protein 183A	Coding
TC1700001036.mm.1	6.75	7.03	-1.22	0.0125	0.3192	Cntnap5c	contactin associated protein-like 5C; Synthetic construct Mus musculus clone IMAGE:100063446, MGC:191086 contactin associated protein-like 5C (Cntnap5c) mRNA, encodes complete protein.	Coding
TC0100002816.mm.1	8.19	8.47	-1.22	0.0129	0.3219	Myeov2	myeloma overexpressed 2	Multiple_Complex
TC1700002185.mm.1	12.31	12.59	-1.22	0.013	0.3235	Klhdc3	kelch domain containing 3	Coding
TC0700004086.mm.1	9.57	9.86	-1.22	0.0135	0.3257	Tmem41b	transmembrane protein 41B	Multiple_Complex
TC1300001590.mm.1	3.84	4.13	-1.22	0.0139	0.3274	Vmn1r-ps100	vomeronasal 1 receptor, pseudogene 100	Multiple_Complex
TC0900001692.mm.1	9.67	9.96	-1.22	0.016	0.3351	Aasdhppt	aminoadipate-semialdehyde dehydrogenase-phosphopantetheinyl transferase	Coding
TC0X00001338.mm.1	14.84	15.13	-1.22	0.0165	0.3379	Plp1	proteolipid protein (myelin) 1	Multiple_Complex
TC1500002059.mm.1	9.44	9.72	-1.22	0.0171	0.3406	Rabl2	RAB, member RAS oncogene family-like 2; RAB, member of RAS oncogene family-like 2; RAB, member of RAS oncogene family-like 2 (Rabl2), mRNA.	Multiple_Complex
TC0300001469.mm.1	12.25	12.54	-1.22	0.0184	0.347	2015-09-01	selenoprotein	Multiple_Complex
TC0500002280.mm.1	15.66	15.95	-1.22	0.0185	0.3471	Nsg1	neuron specific gene family member 1	Coding
TC1500000543.mm.1	8.18	8.46	-1.22	0.0187	0.3478	Them6	thioesterase superfamily member 6	Coding
TC0100000627.mm.1	8.17	8.46	-1.22	0.0188	0.3478	Pnkd	paroxysmal nonkinesiogenic dyskinesia	Multiple_Complex
TC0500003560.mm.1	10.61	10.91	-1.22	0.0188	0.3478	Rac1	RAS-related C3 botulinum substrate 1	Multiple_Complex
TC1100000440.mm.1	9.3	9.59	-1.22	0.0188	0.3478	Rnf145	ring finger protein 145	Multiple_Complex
TC0200005072.mm.1	8.42	8.71	-1.22	0.0196	0.3501	Ptprt	protein tyrosine phosphatase, receptor type, T; Synthetic construct Mus musculus clone IMAGE:100069486, MGC:199388 protein tyrosine phosphatase, receptor type, T (Ptprt) mRNA, encodes complete protein.	Multiple_Complex
TC0800002154.mm.1	8.94	9.22	-1.22	0.0203	0.353	Snx25	sorting nexin 25	Multiple_Complex
TC0200002543.mm.1	11.75	12.03	-1.22	0.0211	0.3558	Slc12a5	solute carrier family 12, member 5	Multiple_Complex
TC1800001453.mm.1	12.09	12.39	-1.22	0.022	0.3587	Txnl1	thioredoxin-like 1	Coding
TC0200005314.mm.1	7.59	7.89	-1.22	0.0226	0.3603	Ctsz	cathepsin Z	Coding
TC0400004074.mm.1	7.29	7.58	-1.22	0.0233	0.3624	Per3	period circadian clock 3; period homolog 3 (Drosophila) (Per3), mRNA.	Multiple_Complex
TC0100001707.mm.1	8.5	8.79	-1.22	0.0244	0.3655	Itpkb	inositol 1,4,5-trisphosphate 3-kinase B	Multiple_Complex
TC1800000367.mm.1	4.8	5.09	-1.22	0.0259	0.3705	Pcdhb11	protocadherin beta 11; Synthetic construct Mus musculus clone IMAGE:100064086, MGC:193457 protocadherin beta 11 (Pcdhb11) mRNA, encodes complete protein.	Coding
TC0800002503.mm.1	10.97	11.26	-1.22	0.0273	0.3731	Tmem184c	transmembrane protein 184C	Multiple_Complex
TC1800001088.mm.1	11.39	11.68	-1.22	0.0308	0.381	Celf4	CUGBP, Elav-like family member 4	Multiple_Complex
TC0300002725.mm.1	13.11	13.4	-1.22	0.0312	0.3823	Gstm1	glutathione S-transferase, mu 1	Coding
TC0900000678.mm.1	9.29	9.58	-1.22	0.0344	0.3875	Rcn2	reticulocalbin 2; reticulocalbin 2 (Rcn2), mRNA.	Multiple_Complex
TC1700001209.mm.1	4.72	5	-1.22	0.0355	0.3893	Galm	galactose mutarotase	Coding
TC0400000294.mm.1	11.12	11.41	-1.22	0.0359	0.3906	Cnr1	cannabinoid receptor 1 (brain)	Multiple_Complex
TC0100002395.mm.1	6.9	7.19	-1.22	0.0362	0.3914	Tmem237	transmembrane protein 237	Coding
TC0X00002171.mm.1	6.88	7.17	-1.22	0.0416	0.4017	Enox2	ecto-NOX disulfide-thiol exchanger 2	Multiple_Complex
TC0900002776.mm.1	6.98	7.26	-1.22	0.0427	0.4043	Ube2cbp	ubiquitin-conjugating enzyme E2C binding protein	Multiple_Complex
TC0700003872.mm.1	3.56	3.85	-1.22	0.0443	0.4043	Olfr571	olfactory receptor 571	Coding
TC0400002120.mm.1	7.98	8.27	-1.22	0.047	0.4084	Tmem68	transmembrane protein 68	Multiple_Complex
TC1600001553.mm.1	10.15	10.42	-1.21	0.004	0.2556	Dirc2	disrupted in renal carcinoma 2 (human)	Coding
TC1200002117.mm.1	7.8	8.08	-1.21	0.0048	0.2594	Tmed8	transmembrane emp24 domain containing 8	Multiple_Complex
TC1100000730.mm.1	11.39	11.67	-1.21	0.0051	0.2614	Mprip	myosin phosphatase Rho interacting protein	Multiple_Complex
TC0700001178.mm.1	7.47	7.74	-1.21	0.0052	0.2621	Tm6sf1	transmembrane 6 superfamily member 1	Multiple_Complex
TC1900000312.mm.1	8.22	8.49	-1.21	0.0055	0.2664	Prune2	prune homolog 2 (Drosophila)	Multiple_Complex
TC0500002719.mm.1	7.8	8.08	-1.21	0.0069	0.2832	Adamts3	a disintegrin-like and metallopeptidase (reprolysin type) with thrombospondin type 1 motif, 3; Synthetic construct Mus musculus clone IMAGE:100066330, MGC:195467 a disintegrin-like and metallopeptidase (reprolysin type) with thrombospondin type 1 motif, 3 (Adamts3) mRNA, encodes complete protein.	Multiple_Complex
TC0700004176.mm.1	10.36	10.63	-1.21	0.007	0.2849	Gde1	glycerophosphodiester phosphodiesterase 1	Multiple_Complex
TC1000000812.mm.1	14.3	14.58	-1.21	0.0079	0.2876	Bsg	basigin	Multiple_Complex
TC0900000821.mm.1	8.5	8.77	-1.21	0.008	0.2882	Megf11	multiple EGF-like-domains 11	Multiple_Complex
TC1100003797.mm.1	10.63	10.9	-1.21	0.0082	0.2912	Ezh1	enhancer of zeste 1 polycomb repressive complex 2 subunit; enhancer of zeste homolog 1 (Drosophila)	Multiple_Complex
TC1600000387.mm.1	11.22	11.5	-1.21	0.0085	0.2955	Opa1	optic atrophy 1	Multiple_Complex
TC0700000243.mm.1	8.76	9.04	-1.21	0.0093	0.3011	Pnmal2	PNMA-like 2	Coding
TC0300001132.mm.1	7.67	7.95	-1.21	0.0094	0.3011	Amigo1	adhesion molecule with Ig like domain 1	Multiple_Complex
TC0400003333.mm.1	10.24	10.51	-1.21	0.0094	0.3011	Lurap1	leucine rich adaptor protein 1	Multiple_Complex
TC0X00002660.mm.1	10.6	10.88	-1.21	0.0103	0.3076	Arhgef9	CDC42 guanine nucleotide exchange factor (GEF) 9	Multiple_Complex
TC1100003418.mm.1	6.71	7	-1.21	0.0103	0.3082	Dhrs11	dehydrogenase/reductase (SDR family) member 11	Coding
TC0X00002712.mm.1	8.86	9.14	-1.21	0.0104	0.3082	Snx12	sorting nexin 12	Multiple_Complex
TC0500003090.mm.1	9.09	9.36	-1.21	0.0114	0.3129	Mlec	malectin	Multiple_Complex
TC1200000580.mm.1	9.6	9.87	-1.21	0.0122	0.3171	Atl1; Gm3086	atlastin GTPase 1; RuvB-like protein 1 pseudogene; predicted gene 3086	Multiple_Complex
TC0500001546.mm.1	9.88	10.16	-1.21	0.0127	0.3204	Gatsl2	GATS protein-like 2	Multiple_Complex
TC0700002627.mm.1	12.18	12.45	-1.21	0.013	0.3235	Gsk3a	glycogen synthase kinase 3 alpha; Synthetic construct Mus musculus clone IMAGE:100062043, MGC:190335 glycogen synthase kinase 3 alpha (Gsk3a) mRNA, encodes complete protein.	Coding
TC0800000277.mm.1	11.78	12.05	-1.21	0.0134	0.3246	Slc20a2	solute carrier family 20, member 2	Coding
TC0400002987.mm.1	12.08	12.35	-1.21	0.0145	0.3297	Slc24a2	solute carrier family 24 (sodium/potassium/calcium exchanger), member 2	Multiple_Complex
TC1700002597.mm.1	10.06	10.34	-1.21	0.0153	0.3329	Slc8a1	solute carrier family 8 (sodium/calcium exchanger), member 1; solute carrier family 8 (sodium/calcium exchanger), member 1 (Slc8a1), transcript variant B, mRNA.	Multiple_Complex
TC1700001158.mm.1	7.81	8.08	-1.21	0.0164	0.3375	Slc30a6	solute carrier family 30 (zinc transporter), member 6	Multiple_Complex
TC0900000794.mm.1	4.96	5.24	-1.21	0.0166	0.3384	Calml4	calmodulin-like 4	Multiple_Complex
TC0300000771.mm.1	8.85	9.13	-1.21	0.0168	0.3396	Ube2q1	ubiquitin-conjugating enzyme E2Q (putative) 1	Multiple_Complex
TC1700001805.mm.1	11.33	11.6	-1.21	0.0169	0.3397	Glo1	glyoxalase 1	Multiple_Complex
TC0100000944.mm.1	7.57	7.84	-1.21	0.0186	0.3475	Atg4b	autophagy related 4B, cysteine peptidase	Multiple_Complex
TC1400001058.mm.1	7.73	8.01	-1.21	0.0213	0.3563	Siah3	seven in absentia homolog 3 (Drosophila)	Coding
TC0800002108.mm.1	9.57	9.85	-1.21	0.0219	0.3585	Mtmr7	myotubularin related protein 7	Multiple_Complex
TC1900001753.mm.1	8.52	8.8	-1.21	0.0224	0.3603	Sfxn4	sideroflexin 4	Multiple_Complex
TC0700000007.mm.1	14.48	14.76	-1.21	0.0228	0.3611	Cacng7	calcium channel, voltage-dependent, gamma subunit 7	Coding
TC1000000265.mm.1	8.52	8.79	-1.21	0.023	0.3614	Echdc1	enoyl Coenzyme A hydratase domain containing 1	Multiple_Complex
TC1800000374.mm.1	7.88	8.16	-1.21	0.0231	0.3614	Pcdhb17	protocadherin beta 17	Coding
TC0600000458.mm.1	6.95	7.22	-1.21	0.0233	0.3624	Clcn1	chloride channel, voltage-sensitive 1; chloride channel 1	Multiple_Complex
TC0500003632.mm.1	7.47	7.74	-1.21	0.0252	0.3673	Slc46a3	solute carrier family 46, member 3	Multiple_Complex
TC0700003790.mm.1	8.94	9.22	-1.21	0.0262	0.3711	Uvrag	UV radiation resistance associated gene	Coding
TC1800000968.mm.1	9.24	9.51	-1.21	0.0263	0.3715	Usp14	ubiquitin specific peptidase 14	Multiple_Complex
TC0500002989.mm.1	9.7	9.97	-1.21	0.0291	0.3771	Fbrsl1	fibrosin-like 1	Coding
TC0500001944.mm.1	8.35	8.63	-1.21	0.0328	0.3855	Grm3	glutamate receptor, metabotropic 3	Coding
TC0600001595.mm.1	10.92	11.2	-1.21	0.0335	0.3871	Cdkn1b	cyclin-dependent kinase inhibitor 1B	Coding
TC1400000373.mm.1	11.25	11.52	-1.21	0.0337	0.3871	Glud1; Gm3219	glutamate dehydrogenase 1; B-cell CLL/lymphoma 7C pseudogene	Multiple_Complex
TC0700003990.mm.1	10.45	10.72	-1.21	0.0345	0.3875	Tpp1	tripeptidyl peptidase I	Coding
TC1000002612.mm.1	9.14	9.42	-1.21	0.035	0.388	Rtcb	RNA 2,3-cyclic phosphate and 5-OH ligase; RNA 2',3'-cyclic phosphate and 5'-OH ligase	Multiple_Complex
TC0900001604.mm.1	4.04	4.31	-1.21	0.0367	0.393	Entpd3	ectonucleoside triphosphate diphosphohydrolase 3	Multiple_Complex
TC1900001541.mm.1	12.72	13	-1.21	0.0379	0.3943	Got1	glutamic-oxaloacetic transaminase 1, soluble; glutamate oxaloacetate transaminase 1, soluble	Multiple_Complex
TC0100001550.mm.1	6.75	7.02	-1.21	0.0382	0.3949	Aldh9a1	aldehyde dehydrogenase 9, subfamily A1	Coding
TC0500001370.mm.1	10.62	10.9	-1.21	0.04	0.3988	Atxn2	ataxin 2	Multiple_Complex
TC1400002223.mm.1	10.61	10.89	-1.21	0.0402	0.3989	Mtmr9	myotubularin related protein 9	Multiple_Complex
TC0900000504.mm.1	7.75	8.02	-1.21	0.0407	0.4	Dpagt1	dolichyl-phosphate (UDP-N-acetylglucosamine) acetylglucosaminephosphotransferase 1 (GlcNAc-1-P transferase)	Coding
TC0400002945.mm.1	8.86	9.13	-1.21	0.0434	0.4043	Ttc39b	tetratricopeptide repeat domain 39B	Multiple_Complex
TC1800000623.mm.1	6.7	6.97	-1.21	0.0439	0.4043	Pdgfrb	platelet derived growth factor receptor, beta polypeptide	Multiple_Complex
TC1900000646.mm.1	16.91	17.18	-1.21	0.0468	0.4083	Scd2; Mir5114	stearoyl-Coenzyme A desaturase 2; microRNA 5114	Multiple_Complex
TC0100000919.mm.1	5.78	6.06	-1.21	0.0469	0.4084	Dusp28	dual specificity phosphatase 28	Coding
TC1200001981.mm.1	7.56	7.83	-1.21	0.0492	0.4113	Rdh11	retinol dehydrogenase 11	Coding
TC0700001862.mm.1	6.27	6.53	-1.2	0.0042	0.2572	Orai3	ORAI calcium release-activated calcium modulator 3	Coding
TC0300001643.mm.1	7.58	7.85	-1.2	0.0043	0.2572	Impa1	inositol (myo)-1(or 4)-monophosphatase 1	Coding
TC0900001486.mm.1	10.74	11	-1.2	0.005	0.2612	Epm2aip1	EPM2A (laforin) interacting protein 1	Multiple_Complex
TC0400002606.mm.1	13.15	13.41	-1.2	0.0055	0.2664	Gabbr2	gamma-aminobutyric acid (GABA) B receptor, 2; Synthetic construct Mus musculus clone IMAGE:100062836, MGC:190967 gamma-aminobutyric acid (GABA) B receptor 2 (Gabbr2) mRNA, encodes complete protein.	Multiple_Complex
TC0400001714.mm.1	9.8	10.06	-1.2	0.0058	0.2703	Ece1	endothelin converting enzyme 1	Multiple_Complex
TC0800002941.mm.1	11.11	11.38	-1.2	0.0059	0.2719	Glg1	golgi apparatus protein 1	Multiple_Complex
TC1900001726.mm.1	7.29	7.55	-1.2	0.0062	0.2767	Hspa12a; Gm19925	heat shock protein 12A; PREDICTED: predicted gene, 19925 (Gm19925), miscRNA.	Multiple_Complex
TC1100003269.mm.1	12.67	12.94	-1.2	0.0074	0.2868	Taok1	TAO kinase 1; Synthetic construct Mus musculus clone IMAGE:100069464, MGC:199366 TAO kinase 1 (Taok1) mRNA, encodes complete protein.	Multiple_Complex
TC1900000609.mm.1	8.81	9.08	-1.2	0.0075	0.2871	Pi4k2a	phosphatidylinositol 4-kinase type 2 alpha	Multiple_Complex
TC0300000866.mm.1	7.73	8	-1.2	0.0078	0.2875	Tdrkh	tudor and KH domain containing protein	Multiple_Complex
TC1100000417.mm.1	13.92	14.18	-1.2	0.0079	0.2876	Gabrb2	gamma-aminobutyric acid (GABA) A receptor, subunit beta 2	Multiple_Complex
TC0900002153.mm.1	8.71	8.97	-1.2	0.0083	0.2935	Abcg4	ATP-binding cassette, sub-family G (WHITE), member 4	Multiple_Complex
TC1900000547.mm.1	11.89	12.15	-1.2	0.0084	0.2943	Lgi1	leucine-rich repeat LGI family, member 1	Multiple_Complex
TC0900002186.mm.1	9.55	9.82	-1.2	0.0084	0.2945	Ube4a	ubiquitination factor E4A; ubiquitination factor E4A, UFD2 homolog (S. cerevisiae)	Multiple_Complex
TC0100002954.mm.1	12.59	12.86	-1.2	0.009	0.2998	Ptpn4	protein tyrosine phosphatase, non-receptor type 4	Multiple_Complex
TC1900001115.mm.1	9.87	10.13	-1.2	0.0092	0.3011	Tmem132a	transmembrane protein 132A	Coding
TC0900002780.mm.1	9.53	9.79	-1.2	0.0097	0.3025	Me1	malic enzyme 1, NADP(+)-dependent, cytosolic	Coding
TC1200000432.mm.1	10.35	10.61	-1.2	0.0098	0.3028	Akap6	A kinase (PRKA) anchor protein 6	Multiple_Complex
TC1000000937.mm.1	7.65	7.91	-1.2	0.0106	0.3085	Chst11	carbohydrate sulfotransferase 11	Multiple_Complex
TC0500000888.mm.1	11.73	11.99	-1.2	0.0107	0.3085	2011-09-01	septin 11	Multiple_Complex
TC1500001056.mm.1	11.33	11.6	-1.2	0.0108	0.309	Scn8a	sodium channel, voltage-gated, type VIII, alpha; sodium channel, voltage-gated, type VIII, alpha (Scn8a), transcript variant 1, mRNA.	Multiple_Complex
TC0X00000522.mm.1	11.63	11.88	-1.2	0.0115	0.3129	Slc9a6	solute carrier family 9 (sodium/hydrogen exchanger), member 6	Coding
TC0600000735.mm.1	13.53	13.79	-1.2	0.0121	0.3166	Grid2	glutamate receptor, ionotropic, delta 2	Multiple_Complex
TC0100002385.mm.1	9.98	10.24	-1.2	0.0131	0.3235	Fam126b	family with sequence similarity 126, member B	Multiple_Complex
TC1900001454.mm.1	11.06	11.32	-1.2	0.0136	0.3263	Ide	insulin degrading enzyme	Multiple_Complex
TC0700002665.mm.1	15.01	15.26	-1.2	0.0136	0.3266	Pgam1-ps2	phosphoglycerate mutase 1, pseudogene 2	Multiple_Complex
TC1100003625.mm.1	10.8	11.06	-1.2	0.0137	0.3268	Nfe2l1	nuclear factor, erythroid derived 2,-like 1	Multiple_Complex
TC0400000996.mm.1	8.65	8.91	-1.2	0.0139	0.3274	Atg4c	autophagy related 4C, cysteine peptidase	Multiple_Complex
TC1300000536.mm.1	10.84	11.1	-1.2	0.0149	0.3315	Fam8a1	family with sequence similarity 8, member A1	Multiple_Complex
TC0800002757.mm.1	6.55	6.82	-1.2	0.0162	0.3361	Slc38a7	solute carrier family 38, member 7	Multiple_Complex
TC1100002087.mm.1	6.53	6.8	-1.2	0.0194	0.3498	Rnf185	ring finger protein 185	Multiple_Complex
TC0100001944.mm.1	10.67	10.93	-1.2	0.0207	0.3554	Vcpip1	valosin containing protein (p97)/p47 complex interacting protein 1	Multiple_Complex
TC1600000982.mm.1	8.06	8.32	-1.2	0.0219	0.3584	Hunk	hormonally upregulated Neu-associated kinase	Coding
TC1300002457.mm.1	9.06	9.32	-1.2	0.0223	0.3599	Aggf1	angiogenic factor with G patch and FHA domains 1; angiogenic factor with G patch and FHA domains 1 (Aggf1), mRNA.	Multiple_Complex
TC1200000110.mm.1	8.67	8.93	-1.2	0.0231	0.3618	Nbas	neuroblastoma amplified sequence	Coding
TC0X00001922.mm.1	10.2	10.46	-1.2	0.0236	0.363	Slc9a7	solute carrier family 9 (sodium/hydrogen exchanger), member 7	Multiple_Complex
TC0500003452.mm.1	6.82	7.08	-1.2	0.0241	0.365	Agfg2	ArfGAP with FG repeats 2 (Agfg2), transcript variant 1, mRNA.; ArfGAP with FG repeats 2	Multiple_Complex
TC0400002080.mm.1	9.32	9.58	-1.2	0.0253	0.3675	Slc35e2	solute carrier family 35, member E2	Multiple_Complex
TC1400001623.mm.1	4.9	5.16	-1.2	0.0254	0.3683	Arf4os; RP24-195I15.5	ADP-ribosylation factor 4, opposite strand [Source:MGI Symbol;Acc:MGI:3642411]; novel protein	Coding
TC0700003823.mm.1	11.52	11.78	-1.2	0.0255	0.3687	Plekhb1	pleckstrin homology domain containing, family B (evectins) member 1	Multiple_Complex
TC0600001281.mm.1	6.65	6.91	-1.2	0.0265	0.372	Tsen2	tRNA splicing endonuclease 2 homolog (S. cerevisiae)	Multiple_Complex
TC0300001161.mm.1	7.47	7.73	-1.2	0.0272	0.3731	Vav3	vav 3 oncogene	Multiple_Complex
TC0300000490.mm.1	12.47	12.74	-1.2	0.0273	0.3734	Ube2v1	ubiquitin-conjugating enzyme E2 variant 1, mRNA (cDNA clone MGC:25512 IMAGE:2646198), complete cds.	Multiple_Complex
TC0X00002165.mm.1	7.92	8.18	-1.2	0.0281	0.3747	Aifm1	apoptosis-inducing factor, mitochondrion-associated 1	Multiple_Complex
TC1200000951.mm.1	6.35	6.61	-1.2	0.0283	0.3749	Flrt2	fibronectin leucine rich transmembrane protein 2	Multiple_Complex
TC0700003977.mm.1	7.17	7.43	-1.2	0.0286	0.3759	Fam160a2	family with sequence similarity 160, member A2	Multiple_Complex
TC0500001146.mm.1	8.21	8.46	-1.2	0.0287	0.3759	Galnt9	UDP-N-acetyl-alpha-D-galactosamine:polypeptide N-acetylgalactosaminyltransferase 9; UDP-N-acetyl-alpha-D-galactosamine:polypeptide N-acetylgalactosaminyltransferase 9 (Galnt9), transcript variant B, mRNA.	Multiple_Complex
TC1200001874.mm.1	6.82	7.08	-1.2	0.0301	0.3793	L2hgdh	L-2-hydroxyglutarate dehydrogenase	Multiple_Complex
TC0400001070.mm.1	7.15	7.4	-1.2	0.0306	0.3802	Oma1	OMA1 homolog, zinc metallopeptidase (S. cerevisiae)	Multiple_Complex
TC1700002790.mm.1	7.86	8.12	-1.2	0.0314	0.3829	H2-L; H2-D1	histocompatibility 2, D region locus L; histocompatibility 2, D region locus 1	Multiple_Complex
TC0900003310.mm.1	8.98	9.24	-1.2	0.0338	0.3871	Lztfl1	leucine zipper transcription factor-like 1	Multiple_Complex
TC1500001824.mm.1	9.76	10.01	-1.2	0.0347	0.3875	Eif3d	eukaryotic translation initiation factor 3, subunit D	Coding
TC0500003220.mm.1	10.9	11.17	-1.2	0.0362	0.3916	Anapc5	anaphase-promoting complex subunit 5; anaphase-promoting complex subunit 5 (Anapc5), transcript variant 2, mRNA.; anaphase-promoting complex subunit 5 (Anapc5), transcript variant 1, mRNA.	Coding
TC1300000893.mm.1	9.78	10.04	-1.2	0.0368	0.3932	Tppp	tubulin polymerization promoting protein	Multiple_Complex
TC0200003135.mm.1	7.28	7.55	-1.2	0.037	0.3932	Tubb4b	tubulin, beta 4B class IVB	Multiple_Complex
TC0400003742.mm.1	8.47	8.72	-1.2	0.0387	0.396	Man1c1	mannosidase, alpha, class 1C, member 1	Multiple_Complex
TC0100001466.mm.1	7.26	7.52	-1.2	0.0389	0.396	Ankrd45	ankyrin repeat domain 45	Multiple_Complex
TC0900001037.mm.1	3.53	3.8	-1.2	0.0399	0.3987	Klhl31	kelch-like 31	Multiple_Complex
TC0400001325.mm.1	10.32	10.57	-1.2	0.04	0.3988	Slc2a1	solute carrier family 2 (facilitated glucose transporter), member 1	Coding
TC1000000133.mm.1	6.76	7.02	-1.2	0.0401	0.3989	Perp	PERP, TP53 apoptosis effector	Coding
TC1100002550.mm.1	11.25	11.52	-1.2	0.042	0.4025	Ccng1	cyclin G1	Multiple_Complex
TC1100000576.mm.1	11.89	12.16	-1.2	0.0445	0.4043	Sar1b	SAR1 gene homolog B (S. cerevisiae)	Multiple_Complex
TC0700001700.mm.1	6.24	6.51	-1.2	0.0447	0.4047			Coding
TC0700002169.mm.1	6.95	7.21	-1.2	0.0469	0.4084	Cox6b2	cytochrome c oxidase subunit VIb polypeptide 2; cytochrome c oxidase subunit VIb polypeptide 2 (Cox6b2), transcript variant 1, mRNA.	Multiple_Complex
TC1000003096.mm.1	11.15	11.42	-1.2	0.0472	0.4089	Tspan31	tetraspanin 31	Coding
TC0200003109.mm.1	6.89	7.15	-1.2	0.0492	0.4113	Hnmt	histamine N-methyltransferase	Coding
TC1500002141.mm.1	13.73	13.99	-1.19	0.0044	0.2581	Slc38a1	solute carrier family 38, member 1	Multiple_Complex
TC1300001353.mm.1	10.9	11.15	-1.19	0.0047	0.2581	Hmgcs1	3-hydroxy-3-methylglutaryl-Coenzyme A synthase 1	Coding
TC0100001195.mm.1	9.99	10.24	-1.19	0.0058	0.2699	Rbbp5	retinoblastoma binding protein 5	Coding
TC1600001528.mm.1	6.22	6.48	-1.19	0.0061	0.2761	Kalrn	kalirin, RhoGEF kinase	Multiple_Complex
TC0800000291.mm.1	11.59	11.84	-1.19	0.0064	0.2793	Ank1	ankyrin 1, erythroid; ankyrin 1, erythroid (Ank1), transcript variant 1, mRNA.; ankyrin 1, erythroid (Ank1), transcript variant 2, mRNA.	Multiple_Complex
TC1500000655.mm.1	8.27	8.51	-1.19	0.0068	0.2832	Gga1	golgi associated, gamma adaptin ear containing, ARF binding protein 1	Coding
TC0900002213.mm.1	9.85	10.1	-1.19	0.0074	0.2868	Sidt2	SID1 transmembrane family, member 2; SID1 transmembrane family, member 2 (Sidt2), mRNA.	Multiple_Complex
TC0700002291.mm.1	6.72	6.98	-1.19	0.0076	0.2873	Vmn2r46; Gm3972	vomeronasal 2, receptor 46; predicted gene 3972	Multiple_Complex
TC0900001732.mm.1	6.06	6.31	-1.19	0.0077	0.2873	Arhgap42	Rho GTPase activating protein 42	Multiple_Complex
TC0900000669.mm.1	9.8	10.05	-1.19	0.0082	0.2917	Ube2q2	ubiquitin-conjugating enzyme E2Q (putative) 2	Multiple_Complex
TC0900002751.mm.1	6.96	7.21	-1.19	0.0083	0.2935	Htr1b	5-hydroxytryptamine (serotonin) receptor 1B	Multiple_Complex
TC0300001843.mm.1	7.72	7.96	-1.19	0.0087	0.2967	Mccc1	methylcrotonoyl-Coenzyme A carboxylase 1 (alpha)	Multiple_Complex
TC1100003466.mm.1	11.18	11.43	-1.19	0.0097	0.3013	Gdpd1	glycerophosphodiester phosphodiesterase domain containing 1	Multiple_Complex
TC1700001021.mm.1	7.72	7.96	-1.19	0.0098	0.3028	Alkbh7	alkB, alkylation repair homolog 7 (E. coli)	Multiple_Complex
TC1200000742.mm.1	7.83	8.08	-1.19	0.0098	0.3027	Plekhd1	pleckstrin homology domain containing, family D (with coiled-coil domains) member 1	Multiple_Complex
TC1100001644.mm.1	11.54	11.79	-1.19	0.0107	0.3085	Cntnap1	contactin associated protein-like 1; Synthetic construct Mus musculus clone IMAGE:100063633, MGC:191104 contactin associated protein-like 1 (Cntnap1) mRNA, encodes complete protein.	Multiple_Complex
TC1700002318.mm.1	7.9	8.15	-1.19	0.0115	0.3131	Dpp9	dipeptidylpeptidase 9	Coding
TC0300000221.mm.1	11.56	11.81	-1.19	0.0119	0.3147	Pik3ca	phosphatidylinositol 3-kinase, catalytic, alpha polypeptide	Multiple_Complex
TC0200002067.mm.1	12.8	13.05	-1.19	0.012	0.3153	Plcb4	phospholipase C, beta 4	Multiple_Complex
TC0500003198.mm.1	7	7.26	-1.19	0.0125	0.3193	Sh2b3	SH2B adaptor protein 3	Coding
TC0100003513.mm.1	9.18	9.44	-1.19	0.0128	0.3208	Atf6	activating transcription factor 6	Multiple_Complex
TC0200003269.mm.1	8.7	8.95	-1.19	0.014	0.3274	Sh3glb2	SH3-domain GRB2-like endophilin B2	Multiple_Complex
TC1100000621.mm.1	9.49	9.74	-1.19	0.0152	0.3329	Acsl6	acyl-CoA synthetase long-chain family member 6	Multiple_Complex
TC0200003142.mm.1	11.18	11.42	-1.19	0.0159	0.3348	Grin1	glutamate receptor, ionotropic, NMDA1 (zeta 1)	Multiple_Complex
TC0900002369.mm.1	12.66	12.92	-1.19	0.0161	0.3353	Scamp5	secretory carrier membrane protein 5	Coding
TC0800001003.mm.1	10.11	10.36	-1.19	0.0164	0.3372	Lonp2	lon peptidase 2, peroxisomal	Multiple_Complex
TC1400001314.mm.1	10.27	10.52	-1.19	0.0169	0.3397	Ipo5	importin 5	Multiple_Complex
TC0500001021.mm.1	6.03	6.29	-1.19	0.0181	0.3455	Dmp1	dentin matrix protein 1	Coding
TC0800001095.mm.1	16.84	17.09	-1.19	0.0183	0.3464	Mt1	metallothionein 1	Coding
TC0500001380.mm.1	13.54	13.8	-1.19	0.0188	0.3478	Ppp1cc	protein phosphatase 1, catalytic subunit, gamma isoform	Multiple_Complex
TC1600000214.mm.1	6.61	6.86	-1.19	0.0193	0.3488	Serpind1	serine (or cysteine) peptidase inhibitor, clade D, member 1	Coding
TC0700002296.mm.1	6.16	6.41	-1.19	0.0198	0.3512	Vmn2r46	vomeronasal 2, receptor 46 (Vmn2r46), mRNA.; vomeronasal 2, receptor 46	Coding
TC0X00002751.mm.1	7.91	8.17	-1.19	0.0201	0.3521	Phka1	phosphorylase kinase alpha 1; Synthetic construct Mus musculus clone IMAGE:100066325, MGC:195462 phosphorylase kinase alpha 1 (Phka1) mRNA, encodes complete protein.	Multiple_Complex
TC1700002549.mm.1	8.64	8.89	-1.19	0.0208	0.3554	Fez2	fasciculation and elongation protein zeta 2 (zygin II); fasciculation and elongation protein zeta 2 (zygin II) (Fez2), mRNA.	Coding
TC0400002529.mm.1	5.77	6.03	-1.19	0.0214	0.3563	Tpm2	tropomyosin 2, beta; tropomyosin 2, beta (Tpm2), mRNA.	Multiple_Complex
TC0500000172.mm.1	7.36	7.62	-1.19	0.0216	0.3573	Fam185a	family with sequence similarity 185, member A	Multiple_Complex
TC0200001395.mm.1	10.35	10.61	-1.19	0.022	0.3587			Multiple_Complex
TC1500001689.mm.1	9.87	10.12	-1.19	0.0222	0.3594	Ago2	argonaute RISC catalytic subunit 2	Multiple_Complex
TC0400000039.mm.1	10.23	10.47	-1.19	0.0226	0.3606	Sdcbp	syndecan binding protein	Multiple_Complex
TC0800002393.mm.1	12.43	12.68	-1.19	0.023	0.3614	Tmem59l	transmembrane protein 59-like	Coding
TC0800001085.mm.1	13.89	14.14	-1.19	0.024	0.3645	Gnao1	guanine nucleotide binding protein, alpha O	Multiple_Complex
TC0800001456.mm.1	5.85	6.09	-1.19	0.0241	0.365	Foxf1	forkhead box F1	Multiple_Complex
TC0500000286.mm.1	9.83	10.08	-1.19	0.0261	0.3711	Hadhb	hydroxyacyl-Coenzyme A dehydrogenase/3-ketoacyl-Coenzyme A thiolase/enoyl-Coenzyme A hydratase (trifunctional protein), beta subunit; hydroxyacyl-Coenzyme A dehydrogenase/3-ketoacyl-Coenzyme A thiolase/enoyl-Coenzyme A hydratase (trifunctional protein), beta subunit (Hadhb), nuclear gene encoding mitochondrial protein, mRNA.	Multiple_Complex
TC0500002170.mm.1	6.82	7.07	-1.19	0.0265	0.372	Slc5a6	solute carrier family 5 (sodium-dependent vitamin transporter), member 6	Multiple_Complex
TC0600001203.mm.1	7.96	8.22	-1.19	0.029	0.3766	Bhlhe40	basic helix-loop-helix family, member e40	Multiple_Complex
TC0200000804.mm.1	7.65	7.91	-1.19	0.0293	0.3776	Lypd6	LY6/PLAUR domain containing 6	Multiple_Complex
TC0X00000686.mm.1	13.04	13.29	-1.19	0.0301	0.3793	Atp2b3	ATPase, Ca++ transporting, plasma membrane 3	Coding
TC0500001898.mm.1	7.7	7.95	-1.19	0.0322	0.3838	Cdk14	cyclin-dependent kinase 14	Multiple_Complex
TC1700001634.mm.1	8.24	8.49	-1.19	0.034	0.3875	Slc9a3r2	solute carrier family 9 (sodium/hydrogen exchanger), member 3 regulator 2	Coding
TC0900001944.mm.1	9.87	10.11	-1.19	0.0353	0.3887	Vps26b	vacuolar protein sorting 26 homolog B (yeast)	Multiple_Complex
TC1500001942.mm.1	6.35	6.6	-1.19	0.0355	0.3892	Naga	N-acetyl galactosaminidase, alpha	Coding
TC1500001717.mm.1	9.67	9.92	-1.19	0.0359	0.3907	Lynx1	Ly6/neurotoxin 1	Multiple_Complex
TC0800002604.mm.1	5.58	5.84	-1.19	0.0363	0.3918	Zfp791	zinc finger protein 791	Coding
TC1600001783.mm.1	4.23	4.48	-1.19	0.0365	0.3923	Olfr178	olfactory receptor 178	Coding
TC1200001018.mm.1	9.71	9.96	-1.19	0.0394	0.3972	Chga	chromogranin A	Coding
TC0400001728.mm.1	11.09	11.34	-1.19	0.0437	0.4043	Camk2n1	calcium/calmodulin-dependent protein kinase II inhibitor 1	Multiple_Complex
TC1200001990.mm.1	7.46	7.71	-1.19	0.0441	0.4043	Actn1	actinin, alpha 1	Multiple_Complex
TC1300002125.mm.1	7.51	7.77	-1.19	0.0451	0.4054	Isca1	iron-sulfur cluster assembly 1 homolog (S. cerevisiae)	Multiple_Complex
TC1700000278.mm.1	8.17	8.42	-1.19	0.0452	0.4055	Zfp760	zinc finger protein 760; zinc finger protein 760 (Zfp760), mRNA.	Multiple_Complex
TC0400000659.mm.1	10.38	10.64	-1.19	0.0468	0.4083	Hsdl2	hydroxysteroid dehydrogenase like 2	Coding
TC0500003645.mm.1	6.66	6.92	-1.19	0.0474	0.4095	Katnal1; 5930430L01Rik	katanin p60 subunit A-like 1; RIKEN cDNA 5930430L01 gene; PREDICTED: RIKEN cDNA 5930430L01 gene (5930430L01Rik), miscRNA.	Multiple_Complex
TC0500001583.mm.1	6.32	6.57	-1.19	0.0489	0.4113	Rhbdd2	rhomboid domain containing 2	Multiple_Complex
TC0100003611.mm.1	6.17	6.41	-1.18	0.0065	0.2794	Opn3	opsin 3; Synthetic construct Mus musculus clone IMAGE:100062735, MGC:190946 opsin 3 (Opn3) mRNA, encodes complete protein.	Coding
TC0700004626.mm.1	13.13	13.37	-1.18	0.0075	0.2868	Sez6l2	seizure related 6 homolog like 2	Multiple_Complex
TC0700003818.mm.1	11.36	11.6	-1.18	0.0079	0.2876	Ppme1	protein phosphatase methylesterase 1	Coding
TC1400001456.mm.1	12.34	12.58	-1.18	0.0089	0.2995	Cadps	Ca2+-dependent secretion activator	Coding
TC0300001023.mm.1	7.22	7.46	-1.18	0.0089	0.2995	Casq2	calsequestrin 2	Multiple_Complex
TC0900001038.mm.1	9.74	9.98	-1.18	0.0089	0.2995	Gclc	glutamate-cysteine ligase, catalytic subunit	Coding
TC1000003105.mm.1	8.88	9.12	-1.18	0.009	0.2995	Pip4k2c	phosphatidylinositol-5-phosphate 4-kinase, type II, gamma	Coding
TC1900000703.mm.1	7.73	7.97	-1.18	0.009	0.2995	Trim8	tripartite motif-containing 8; Synthetic construct Mus musculus clone IMAGE:100068118, MGC:195735 tripartite motif protein 8 (Trim8) mRNA, encodes complete protein.	Coding
TC1100001451.mm.1	12.33	12.57	-1.18	0.0091	0.2998	Ppp1r9b	protein phosphatase 1, regulatory subunit 9B	Multiple_Complex
TC1400002248.mm.1	8.47	8.7	-1.18	0.0092	0.3011	Extl3	exostoses (multiple)-like 3	Multiple_Complex
TC0200002437.mm.1	12	12.24	-1.18	0.0092	0.3011	Slc32a1	solute carrier family 32 (GABA vesicular transporter), member 1	Coding
TC0900001942.mm.1	6.89	7.13	-1.18	0.0095	0.3013	Acad8	acyl-Coenzyme A dehydrogenase family, member 8	Multiple_Complex
TC0600002351.mm.1	9.86	10.1	-1.18	0.0096	0.3013	Ppm1k	protein phosphatase 1K (PP2C domain containing)	Multiple_Complex
TC1700002660.mm.1	12.79	13.04	-1.18	0.01	0.3035	Prepl	prolyl endopeptidase-like	Multiple_Complex
TC0800002236.mm.1	10.18	10.42	-1.18	0.0102	0.3075	Spcs3	signal peptidase complex subunit 3 homolog (S. cerevisiae)	Coding
TC1000003007.mm.1	10.2	10.44	-1.18	0.0105	0.3085	Cand1	cullin associated and neddylation disassociated 1	Multiple_Complex
TC1200001302.mm.1	10.02	10.26	-1.18	0.011	0.3109	Esyt2	extended synaptotagmin-like protein 2; extended synaptotagmin-like protein 2 (Esyt2), mRNA.	Multiple_Complex
TC0400002837.mm.1	10.98	11.21	-1.18	0.0111	0.3114	Brinp1	bone morphogenic protein/retinoic acid inducible neural specific 1	Multiple_Complex
TC0300000507.mm.1	10.93	11.17	-1.18	0.0111	0.3114	Gmps	guanine monophosphate synthetase; guanine monphosphate synthetase	Multiple_Complex
TC0200000879.mm.1	5.69	5.93	-1.18	0.0115	0.3131	Upp2	uridine phosphorylase 2	Multiple_Complex
TC0600001751.mm.1	9.33	9.57	-1.18	0.0116	0.3132	Far2	fatty acyl CoA reductase 2	Multiple_Complex
TC0700001869.mm.1	7.92	8.16	-1.18	0.0117	0.3139	Bckdk	branched chain ketoacid dehydrogenase kinase	Multiple_Complex
TC0400002271.mm.1	11.22	11.46	-1.18	0.0118	0.3139	Wwp1	WW domain containing E3 ubiquitin protein ligase 1; WW domain containing E3 ubiquitin protein ligase 1 (Wwp1), mRNA.	Multiple_Complex
TC0900000826.mm.1	11.31	11.55	-1.18	0.0119	0.3148	Dpp8	dipeptidylpeptidase 8	Multiple_Complex
TC1100001704.mm.1	9.96	10.19	-1.18	0.0121	0.3166	Nmt1	N-myristoyltransferase 1	Multiple_Complex
TC0400000179.mm.1	9	9.23	-1.18	0.0124	0.3189	Usp45	ubiquitin specific petidase 45	Multiple_Complex
TC0400000654.mm.1	9.24	9.48	-1.18	0.0127	0.3204	Ugcg	UDP-glucose ceramide glucosyltransferase	Multiple_Complex
TC1200000671.mm.1	7.83	8.07	-1.18	0.0132	0.3242	Syne2; Mir5101	spectrin repeat containing, nuclear envelope 2; microRNA 5101	Multiple_Complex
TC0400002712.mm.1	14.12	14.37	-1.18	0.0135	0.3249	Frrs1l	ferric-chelate reductase 1 like	Multiple_Complex
TC0200005094.mm.1	15.25	15.49	-1.18	0.0135	0.3256	Serinc3	serine incorporator 3	Multiple_Complex
TC1300000655.mm.1	10.77	11.01	-1.18	0.0137	0.3269	Prelid1	PRELI domain containing 1	Coding
TC0900002346.mm.1	12.33	12.57	-1.18	0.014	0.3274	Tspan3	tetraspanin 3	Coding
TC0500002458.mm.1	9.91	10.15	-1.18	0.0148	0.3307	Arap2	ArfGAP with RhoGAP domain, ankyrin repeat and PH domain 2	Multiple_Complex
TC0700001347.mm.1	9.31	9.56	-1.18	0.0148	0.3307	Kctd21	potassium channel tetramerisation domain containing 21	Coding
TC1000001955.mm.1	6.88	7.12	-1.18	0.0157	0.3346	Tpd52l1	tumor protein D52-like 1; Synthetic construct Mus musculus clone IMAGE:100063875, MGC:193342 tumor protein D52-like 1 (Tpd52l1) mRNA, encodes complete protein.	Coding
TC1800001507.mm.1	12.15	12.39	-1.18	0.0165	0.3379	Spire1	spire homolog 1 (Drosophila)	Multiple_Complex
TC1100004064.mm.1	7.14	7.37	-1.18	0.017	0.3406	Fads6	fatty acid desaturase domain family, member 6	Multiple_Complex
TC0500001746.mm.1	10.01	10.25	-1.18	0.0175	0.3416	Lmtk2	lemur tyrosine kinase 2	Multiple_Complex
TC0800001362.mm.1	6.88	7.11	-1.18	0.0177	0.3432	Wwox	WW domain-containing oxidoreductase	Multiple_Complex
TC1100002553.mm.1	11.08	11.32	-1.18	0.0183	0.3465	Gabrg2	gamma-aminobutyric acid (GABA) A receptor, subunit gamma 2; gamma-aminobutyric acid (GABA) A receptor, subunit gamma 2 (Gabrg2), transcript variant 1, mRNA.	Multiple_Complex
TC0700003592.mm.1	10.67	10.91	-1.18	0.0184	0.3466	Man2a2	mannosidase 2, alpha 2	Multiple_Complex
TC0700000465.mm.1	9.1	9.34	-1.18	0.0188	0.3478	Akt2	thymoma viral proto-oncogene 2	Multiple_Complex
TC0900000126.mm.1	9.24	9.49	-1.18	0.0196	0.3501	Slc36a4	solute carrier family 36 (proton/amino acid symporter), member 4	Multiple_Complex
TC0900002003.mm.1	7.42	7.67	-1.18	0.0196	0.3501	St3gal4	ST3 beta-galactoside alpha-2,3-sialyltransferase 4	Coding
TC0100002184.mm.1	7.42	7.66	-1.18	0.0207	0.3554	Lman2l	lectin, mannose-binding 2-like	Multiple_Complex
TC0800001323.mm.1	8.36	8.59	-1.18	0.0208	0.3554	Cog4	component of oligomeric golgi complex 4	Multiple_Complex
TC0200002341.mm.1	7.39	7.63	-1.18	0.0213	0.3563	Cbfa2t2	core-binding factor, runt domain, alpha subunit 2, translocated to, 2 (human)	Multiple_Complex
TC0600001380.mm.1	9.43	9.67	-1.18	0.0219	0.3585	M6pr	mannose-6-phosphate receptor, cation dependent	Multiple_Complex
TC1700001876.mm.1	12.17	12.4	-1.18	0.0219	0.3585	Rab11b	RAB11B, member RAS oncogene family	Multiple_Complex
TC0600000454.mm.1	7.1	7.34	-1.18	0.0222	0.3594	Gstk1	glutathione S-transferase kappa 1	Coding
TC1300000259.mm.1	5.8	6.04	-1.18	0.0222	0.3593	Hist1h2bb	histone cluster 1, H2bb	Coding
TC0X00000323.mm.1	11.95	12.19	-1.18	0.0223	0.3601	Pgrmc1	progesterone receptor membrane component 1	Coding
TC0X00002207.mm.1	5.48	5.72	-1.18	0.0226	0.3603	Gpc4	glypican 4	Coding
TC1000002900.mm.1	7.81	8.04	-1.18	0.023	0.3614	Tmem19	transmembrane protein 19; transmembrane protein 19 (Tmem19), mRNA.	Coding
TC1200002392.mm.1	5.91	6.15	-1.18	0.0238	0.3638	Mok	MOK protein kinase	Multiple_Complex
TC1100003299.mm.1	7.97	8.21	-1.18	0.0246	0.3657	Tnfaip1	tumor necrosis factor, alpha-induced protein 1 (endothelial)	Coding
TC0900001402.mm.1	11.17	11.41	-1.18	0.0247	0.366	Gpx1	glutathione peroxidase 1	Coding
TC1300000033.mm.1	8.89	9.13	-1.18	0.0248	0.3663	Pitrm1	pitrilysin metallepetidase 1	Coding
TC0800001328.mm.1	8.32	8.56	-1.18	0.0251	0.3673	Pdpr	pyruvate dehydrogenase phosphatase regulatory subunit	Multiple_Complex
TC0700003618.mm.1	12.18	12.42	-1.18	0.0256	0.3693	Btbd1	BTB (POZ) domain containing 1	Coding
TC0300000605.mm.1	11.09	11.33	-1.18	0.0267	0.3726	Serpini1	serine (or cysteine) peptidase inhibitor, clade I, member 1	Multiple_Complex
TC1600000038.mm.1	10.65	10.9	-1.18	0.028	0.3747	Mgrn1	mahogunin, ring finger 1; mahogunin, ring finger 1 (Mgrn1), transcript variant 2, mRNA.	Coding
TC1900000921.mm.1	6.02	6.27	-1.18	0.0281	0.3747	Rhod	ras homolog gene family, member D	Multiple_Complex
TC0400002330.mm.1	9.09	9.32	-1.18	0.0285	0.3756	Manea	mannosidase, endo-alpha	Multiple_Complex
TC0200004169.mm.1	10.51	10.74	-1.18	0.0297	0.3782	Hsd17b12	hydroxysteroid (17-beta) dehydrogenase 12	Multiple_Complex
TC0400002531.mm.1	8.22	8.46	-1.18	0.0302	0.3793	Gba2	glucosidase beta 2	Multiple_Complex
TC1900000943.mm.1	7.12	7.35	-1.18	0.0302	0.3793	Peli3	pellino 3	Multiple_Complex
TC1200000626.mm.1	11.4	11.64	-1.18	0.031	0.3814	Ppm1a	protein phosphatase 1A, magnesium dependent, alpha isoform	Coding
TC0200000929.mm.1	12.2	12.44	-1.18	0.0316	0.3835	Slc4a10	solute carrier family 4, sodium bicarbonate cotransporter-like, member 10	Multiple_Complex
TC0800002553.mm.1	15.15	15.39	-1.18	0.032	0.3838	Tecr	trans-2,3-enoyl-CoA reductase	Coding
TC1700002214.mm.1	5.39	5.63	-1.18	0.0349	0.3877	Mdfi	MyoD family inhibitor; MyoD family inhibitor (Mdfi), transcript variant 1, mRNA.	Multiple_Complex
TC0400001020.mm.1	7.32	7.56	-1.18	0.036	0.391	Cachd1	cache domain containing 1	Multiple_Complex
TC1100002160.mm.1	8.79	9.02	-1.18	0.0361	0.3911	Nudcd3	NudC domain containing 3	Multiple_Complex
TC1400002523.mm.1	5.94	6.19	-1.18	0.037	0.3932	Pcdh20	protocadherin 20	Coding
TC0300001176.mm.1	11.41	11.65	-1.18	0.0376	0.3932	Olfm3	olfactomedin 3	Coding
TC0300001795.mm.1	9.33	9.56	-1.18	0.0389	0.396	Slc7a14	solute carrier family 7 (cationic amino acid transporter, y+ system), member 14	Coding
TC1300000908.mm.1	6.84	7.08	-1.18	0.0396	0.3982	Pcsk1	proprotein convertase subtilisin/kexin type 1	Multiple_Complex
TC1900001026.mm.1	10.88	11.11	-1.18	0.04	0.3988	Fkbp2	FK506 binding protein 2	Coding
TC0800003200.mm.1	10.98	11.22	-1.18	0.0406	0.3998	Tomm20	translocase of outer mitochondrial membrane 20 homolog (yeast)	Multiple_Complex
TC0200002537.mm.1	8.91	9.15	-1.18	0.041	0.4009	Ctsa	cathepsin A	Multiple_Complex
TC1600001419.mm.1	5.57	5.81	-1.18	0.0413	0.4013	Cldn1	claudin 1	Coding
TC0100003743.mm.1	9.93	10.16	-1.18	0.0417	0.4017	Mark1	MAP/microtubule affinity regulating kinase 1; MAP/microtubule affinity-regulating kinase 1	Multiple_Complex
TC1200002020.mm.1	8.73	8.97	-1.18	0.0441	0.4043	Adam4	a disintegrin and metallopeptidase domain 4	Coding
TC1400001012.mm.1	6.42	6.66	-1.18	0.0464	0.4077	Gfra2	glial cell line derived neurotrophic factor family receptor alpha 2	Coding
TC1200000819.mm.1	8.33	8.56	-1.18	0.047	0.4084	Isca2	iron-sulfur cluster assembly 2 homolog (S. cerevisiae)	Coding
TC0300002583.mm.1	10.18	10.42	-1.18	0.047	0.4084	Man1a2	mannosidase, alpha, class 1A, member 2	Multiple_Complex
TC0600002965.mm.1	6.55	6.79	-1.18	0.0486	0.4112	Plxnd1	plexin D1	Multiple_Complex
TC1300000691.mm.1	5.73	5.97	-1.18	0.0487	0.4112	Tgfbi	transforming growth factor, beta induced	Coding
TC1100002175.mm.1	13.49	13.73	-1.18	0.0488	0.4112	Purb	purine rich element binding protein B	Multiple_Complex
TC0600001092.mm.1	9.8	10.04	-1.18	0.0492	0.4113	Slc6a6	solute carrier family 6 (neurotransmitter transporter, taurine), member 6	Coding
TC1100001529.mm.1	8.85	9.09	-1.18	0.0496	0.4122	Mrpl10	mitochondrial ribosomal protein L10	Multiple_Complex
TC0200005101.mm.1	7.28	7.51	-1.18	0.0498	0.4131	Rims4	regulating synaptic membrane exocytosis 4	Multiple_Complex
TC0900002179.mm.1	8.48	8.71	-1.17	0.0063	0.2774	Tmem25	transmembrane protein 25	Multiple_Complex
TC1700001673.mm.1	8.53	8.76	-1.17	0.0083	0.2931	Fam173a	family with sequence similarity 173, member A; family with sequence similarity 173, member A (Fam173a), mRNA.	Coding
TC0900000095.mm.1	9.25	9.48	-1.17	0.009	0.2995	Mtmr2	myotubularin related protein 2	Multiple_Complex
TC0X00001619.mm.1	11.03	11.25	-1.17	0.0106	0.3085	Map7d2	MAP7 domain containing 2	Multiple_Complex
TC0500001462.mm.1	8.46	8.69	-1.17	0.0107	0.3087	Bri3bp	Bri3 binding protein	Multiple_Complex
TC1700001890.mm.1	6.32	6.55	-1.17	0.011	0.3113	H2-K2	histocompatibility 2, K region locus 2	Multiple_Complex
TC0100000116.mm.1	9.59	9.81	-1.17	0.0111	0.3114	Tfap2b	transcription factor AP-2 beta; transcription factor AP-2 beta (Tfap2b), transcript variant 1, mRNA.	Multiple_Complex
TC0300001064.mm.1	9.61	9.84	-1.17	0.0114	0.3129	Ptpn22	protein tyrosine phosphatase, non-receptor type 22 (lymphoid); protein tyrosine phosphatase, non-receptor type 22 (lymphoid) (Ptpn22), mRNA.	Multiple_Complex
TC0200003190.mm.1	8.49	8.72	-1.17	0.0128	0.3204	Inpp5e	inositol polyphosphate-5-phosphatase E	Multiple_Complex
TC0400001235.mm.1	9.05	9.27	-1.17	0.0131	0.3235	Atpaf1	ATP synthase mitochondrial F1 complex assembly factor 1; ATP synthase mitochondrial F1 complex assembly factor 1 (Atpaf1), nuclear gene encoding mitochondrial protein, mRNA.	Multiple_Complex
TC0800000847.mm.1	6.4	6.62	-1.17	0.0135	0.3249	Rasd2	RASD family, member 2	Coding
TC1300000551.mm.1	10.7	10.92	-1.17	0.0137	0.3273	Id4	inhibitor of DNA binding 4; Synthetic construct Mus musculus clone IMAGE:100069483, MGC:199385 inhibitor of DNA binding 4 (Id4) mRNA, encodes complete protein.	Coding
TC0500003019.mm.1	11.22	11.44	-1.17	0.014	0.3274	Sez6l	seizure related 6 homolog like	Multiple_Complex
TC0400002791.mm.1	8.07	8.29	-1.17	0.0145	0.3299	Alad	aminolevulinate, delta-, dehydratase	Multiple_Complex
TC0700001287.mm.1	11.8	12.02	-1.17	0.0149	0.3315	Dlg2	discs, large homolog 2 (Drosophila); Synthetic construct Mus musculus clone IMAGE:100015000, MGC:180335 discs, large homolog 2 (Drosophila) (Dlg2) mRNA, encodes complete protein.	Multiple_Complex
TC0200005512.mm.1	7.71	7.94	-1.17	0.0152	0.3329	Nfs1	nitrogen fixation gene 1 (S. cerevisiae)	Multiple_Complex
TC0X00001555.mm.1	10.75	10.98	-1.17	0.0158	0.3347	Rragb	Ras-related GTP binding B	Coding
TC1900000356.mm.1	12.22	12.44	-1.17	0.0158	0.3347	Trpm3	transient receptor potential cation channel, subfamily M, member 3	Multiple_Complex
TC0400001641.mm.1	7.95	8.17	-1.17	0.0168	0.3396	Paqr7	progestin and adipoQ receptor family member VII	Multiple_Complex
TC0600000556.mm.1	11.66	11.89	-1.17	0.0169	0.3397	Atp6v0e2	ATPase, H+ transporting, lysosomal V0 subunit E2	Coding
TC0500002214.mm.1	9.72	9.95	-1.17	0.0172	0.3407	Ctbp1	C-terminal binding protein 1	Coding
TC1900000439.mm.1	8.99	9.22	-1.17	0.0174	0.3413	Jak2	Janus kinase 2	Multiple_Complex
TC0100000027.mm.1	12.18	12.41	-1.17	0.018	0.3452	Pcmtd1	protein-L-isoaspartate (D-aspartate) O-methyltransferase domain containing 1	Multiple_Complex
TC0400003821.mm.1	9.24	9.46	-1.17	0.0187	0.3478	Pink1; Mir7019	PTEN induced putative kinase 1; microRNA 7019	Multiple_Complex
TC0700002791.mm.1	12.87	13.1	-1.17	0.0191	0.3484	Scn1b	sodium channel, voltage-gated, type I, beta	Coding
TC0500002745.mm.1	11.56	11.8	-1.17	0.0192	0.3487	G3bp2	GTPase activating protein (SH3 domain) binding protein 2	Multiple_Complex
TC0400001608.mm.1	9.29	9.51	-1.17	0.0195	0.3501	Slc9a1; Mir5122	solute carrier family 9 (sodium/hydrogen exchanger), member 1; microRNA 5122	Multiple_Complex
TC0600000998.mm.1	12.66	12.89	-1.17	0.0199	0.3516	Aak1	AP2 associated kinase 1	Multiple_Complex
TC0800000426.mm.1	8.27	8.5	-1.17	0.0201	0.3522	Mfhas1	malignant fibrous histiocytoma amplified sequence 1	Multiple_Complex
TC0400000138.mm.1	15.4	15.63	-1.17	0.0207	0.3554	Calb1	calbindin 1	Multiple_Complex
TC0200002759.mm.1	5.83	6.06	-1.17	0.0207	0.3554	Fam217b	family with sequence similarity 217, member B	Multiple_Complex
TC1100001074.mm.1	13.02	13.25	-1.17	0.0211	0.3558	Pitpna	phosphatidylinositol transfer protein, alpha	Multiple_Complex
TC1400002262.mm.1	5.67	5.9	-1.17	0.0214	0.3563	Scara3	scavenger receptor class A, member 3	Multiple_Complex
TC0300002212.mm.1	12.18	12.41	-1.17	0.0215	0.3571	Glrb	glycine receptor, beta subunit; glycine receptor, beta subunit (Glrb), mRNA.	Multiple_Complex
TC1100003774.mm.1	8.74	8.97	-1.17	0.0219	0.3584	Klhl11	kelch-like 11	Coding
TC0X00000471.mm.1	12.74	12.96	-1.17	0.022	0.3585	Hprt	hypoxanthine guanine phosphoribosyl transferase	Coding
TC0200005102.mm.1	7.71	7.93	-1.17	0.0223	0.3598	Tomm34	translocase of outer mitochondrial membrane 34	Multiple_Complex
TC1400002349.mm.1	9.27	9.5	-1.17	0.0228	0.3611	Xpo7	exportin 7; exportin 7 (Xpo7), mRNA.	Multiple_Complex
TC0900000330.mm.1	8.97	9.19	-1.17	0.0233	0.3624	Srpr	signal recognition particle receptor (docking protein); signal recognition particle receptor ('docking protein')	Multiple_Complex
TC1200002358.mm.1	5.19	5.42	-1.17	0.0238	0.3638	Slc25a29	solute carrier family 25 (mitochondrial carrier, palmitoylcarnitine transporter), member 29	Multiple_Complex
TC0700004548.mm.1	9.4	9.63	-1.17	0.0248	0.3664	Tollip	toll interacting protein	Coding
TC0100002054.mm.1	12.8	13.03	-1.17	0.0271	0.3731	Rims1	regulating synaptic membrane exocytosis 1; regulating synaptic membrane exocytosis 1 (Rims1), transcript variant 3, mRNA.; Synthetic construct Mus musculus clone IMAGE:100064122, MGC:193493 regulating synaptic membrane exocytosis 1 (Rims1) mRNA, encodes complete protein.	Coding
TC1300001827.mm.1	11.51	11.73	-1.17	0.0277	0.3739	Ssr1	signal sequence receptor, alpha	Multiple_Complex
TC0600002070.mm.1	10.96	11.19	-1.17	0.028	0.3747	Mtpn	myotrophin	Multiple_Complex
TC1500000939.mm.1	7.38	7.61	-1.17	0.0288	0.3765	Ano6	anoctamin 6	Multiple_Complex
TC1600000054.mm.1	12.72	12.95	-1.17	0.0295	0.3777	Rbfox1	RNA binding protein, fox-1 homolog (C. elegans) 1	Multiple_Complex
TC1100000763.mm.1	7.97	8.2	-1.17	0.0302	0.3793	Smcr8	Smith-Magenis syndrome chromosome region, candidate 8 homolog (human)	Multiple_Complex
TC0100003439.mm.1	7.03	7.26	-1.17	0.0325	0.3845	Sft2d2	SFT2 domain containing 2	Coding
TC0700001922.mm.1	8.83	9.06	-1.17	0.0326	0.3845	Acadsb	acyl-Coenzyme A dehydrogenase, short/branched chain	Multiple_Complex
TC1900001361.mm.1	8.1	8.33	-1.17	0.0336	0.3871	Prkg1	protein kinase, cGMP-dependent, type I	Multiple_Complex
TC1000000367.mm.1	12.37	12.6	-1.17	0.0338	0.3871	Cd164	CD164 antigen	Multiple_Complex
TC1100004202.mm.1	12.47	12.7	-1.17	0.0343	0.3875	Actg1; Mir6935	actin, gamma, cytoplasmic 1; microRNA 6935	Multiple_Complex
TC0800002881.mm.1	10.3	10.53	-1.17	0.0352	0.3881	Psmd7	proteasome (prosome, macropain) 26S subunit, non-ATPase, 7	Multiple_Complex
TC0200000419.mm.1	4.96	5.18	-1.17	0.036	0.391	Clic3	chloride intracellular channel 3	Multiple_Complex
TC0700004166.mm.1	12.6	12.83	-1.17	0.0367	0.3932	Smg1	SMG1 homolog, phosphatidylinositol 3-kinase-related kinase (C. elegans)	Multiple_Complex
TC0800000646.mm.1	8.73	8.95	-1.17	0.0374	0.3932	Mfap3l	microfibrillar-associated protein 3-like	Multiple_Complex
TC0300001192.mm.1	7.47	7.7	-1.17	0.0391	0.3963	Dbt	dihydrolipoamide branched chain transacylase E2	Coding
TC1100001157.mm.1	7.5	7.72	-1.17	0.0397	0.3983	Pigs	phosphatidylinositol glycan anchor biosynthesis, class S; phosphatidylinositol glycan anchor biosynthesis, class S (Pigs), mRNA.	Multiple_Complex
TC1500000731.mm.1	7.95	8.17	-1.17	0.0426	0.4043	Tef	thyrotroph embryonic factor	Multiple_Complex
TC0600002518.mm.1	8.69	8.91	-1.17	0.043	0.4043	Rnf26	ring finger protein 26	Multiple_Complex
TC0200002295.mm.1	9.03	9.26	-1.17	0.0436	0.4043	H13	histocompatibility 13	Multiple_Complex
TC0600002610.mm.1	7.28	7.51	-1.17	0.044	0.4043	Rab11fip5; Mir705	RAB11 family interacting protein 5 (class I); microRNA 705; Synthetic construct Mus musculus clone IMAGE:100069506, MGC:199408 RAB11 family interacting protein 5 (class I) (Rab11fip5) mRNA, encodes complete protein.	Multiple_Complex
TC1700000577.mm.1	6.38	6.6	-1.17	0.0442	0.4043	Olfr55	olfactory receptor 55	Coding
TC1700001436.mm.1	4.28	4.51	-1.17	0.0445	0.4043	Qk	quaking	Coding
TC1600000186.mm.1	5.09	5.32	-1.17	0.0446	0.4044	Efcab1	EF hand calcium binding domain 1	Coding
TC0X00000902.mm.1	8.05	8.27	-1.17	0.0448	0.4047	Zxdb	zinc finger, X-linked, duplicated B	Coding
TC0900003160.mm.1	9.99	10.22	-1.17	0.0461	0.4076	Pdcd6ip	programmed cell death 6 interacting protein	Multiple_Complex
TC1200000622.mm.1	5.48	5.71	-1.17	0.0473	0.4093	Lrrc9	leucine rich repeat containing 9	Multiple_Complex
TC0400004093.mm.1	8.55	8.78	-1.17	0.0474	0.4095	Hes3	hairy and enhancer of split 3 (Drosophila)	Coding
TC0900002307.mm.1	10.71	10.94	-1.17	0.048	0.411	Acat1	acetyl-Coenzyme A acetyltransferase 1	Multiple_Complex
TC0600001679.mm.1	9.26	9.48	-1.17	0.0481	0.411	Golt1b	golgi transport 1 homolog B (S. cerevisiae)	Multiple_Complex
TC1800001048.mm.1	13.28	13.51	-1.17	0.0484	0.4111	B4galt6	UDP-Gal:betaGlcNAc beta 1,4-galactosyltransferase, polypeptide 6	Coding
TC0700000655.mm.1	8.83	9.06	-1.17	0.0493	0.4115	Slc7a10	solute carrier family 7 (cationic amino acid transporter, y+ system), member 10	Multiple_Complex
TC1000001286.mm.1	10.18	10.4	-1.16	0.0084	0.2943	Osbpl8	oxysterol binding protein-like 8	Multiple_Complex
TC1700002400.mm.1	13.13	13.34	-1.16	0.0096	0.3013	Pja2	praja 2, RING-H2 motif containing	Coding
TC1000002195.mm.1	15.92	16.13	-1.16	0.0103	0.3082	Serinc1	serine incorporator 1	Multiple_Complex
TC1800000916.mm.1	11.54	11.76	-1.16	0.0104	0.3085	Tmx3	thioredoxin-related transmembrane protein 3	Multiple_Complex
TC0100003604.mm.1	10.76	10.97	-1.16	0.0126	0.3199	Rgs7	regulator of G protein signaling 7	Multiple_Complex
TC0200002439.mm.1	10.02	10.23	-1.16	0.0131	0.3235	Ppp1r16b	protein phosphatase 1, regulatory (inhibitor) subunit 16B	Multiple_Complex
TC0900001672.mm.1	3.64	3.86	-1.16	0.0132	0.3242	Cxcr6	chemokine (C-X-C motif) receptor 6	Coding
TC1700000148.mm.1	9.11	9.32	-1.16	0.0132	0.3242	Sod2	superoxide dismutase 2, mitochondrial	Multiple_Complex
TC1800000706.mm.1	7.51	7.73	-1.16	0.0142	0.3279	Slmo1	slowmo homolog 1 (Drosophila)	Coding
TC1300000625.mm.1	11.47	11.68	-1.16	0.0152	0.3329	Cplx2	complexin 2; Synthetic construct Mus musculus clone IMAGE:100064048, MGC:193419 complexin 2 (Cplx2) mRNA, encodes complete protein.	Coding
TC0500003186.mm.1	8.46	8.68	-1.16	0.0161	0.336	Trafd1	TRAF type zinc finger domain containing 1	Multiple_Complex
TC0X00002482.mm.1	8.8	9.01	-1.16	0.0165	0.3379	Pls3	plastin 3 (T-isoform)	Multiple_Complex
TC0200002084.mm.1	6.25	6.46	-1.16	0.017	0.3405	Btbd3	BTB (POZ) domain containing 3	Multiple_Complex
TC1100001834.mm.1	12.16	12.37	-1.16	0.0172	0.3408	Prkar1a	protein kinase, cAMP dependent regulatory, type I, alpha	Multiple_Complex
TC0200003304.mm.1	6.86	7.08	-1.16	0.0182	0.3464	Slc25a25	solute carrier family 25 (mitochondrial carrier, phosphate carrier), member 25	Multiple_Complex
TC1000000469.mm.1	10.55	10.77	-1.16	0.0183	0.3464	Nus1	nuclear undecaprenyl pyrophosphate synthase 1 homolog (S. cerevisiae)	Multiple_Complex
TC1400000511.mm.1	9.85	10.07	-1.16	0.0188	0.3478	Mapk1ip1l	mitogen-activated protein kinase 1 interacting protein 1-like	Multiple_Complex
TC1900001569.mm.1	7.24	7.46	-1.16	0.0199	0.3512	Mrpl43	mitochondrial ribosomal protein L43	Coding
TC1900000628.mm.1	11.95	12.16	-1.16	0.02	0.3521	Cnnm1	cyclin M1	Coding
TC0500003191.mm.1	8.27	8.49	-1.16	0.02	0.352	Mapkapk5; Adam1a	MAP kinase-activated protein kinase 5; a disintegrin and metallopeptidase domain 1a	Multiple_Complex
TC0700004126.mm.1	8.4	8.61	-1.16	0.0201	0.3522	Btbd10	BTB (POZ) domain containing 10	Multiple_Complex
TC1000000473.mm.1	8.05	8.27	-1.16	0.0204	0.3535	Slc35f1	solute carrier family 35, member F1	Coding
TC1700002316.mm.1	7.83	8.04	-1.16	0.0211	0.3558	Sema6b	sema domain, transmembrane domain (TM), and cytoplasmic domain, (semaphorin) 6B	Coding
TC1000000142.mm.1	6.9	7.11	-1.16	0.0212	0.356	Ifngr1	interferon gamma receptor 1	Multiple_Complex
TC0400000982.mm.1	8.31	8.53	-1.16	0.0214	0.3563	Inadl	InaD-like (Drosophila)	Multiple_Complex
TC1800000288.mm.1	3.96	4.17	-1.16	0.022	0.3585	Wnt8a	wingless-type MMTV integration site family, member 8A; wingless-related MMTV integration site 8A	Coding
TC0400003888.mm.1	7.67	7.89	-1.16	0.0221	0.359	Plekhm2	pleckstrin homology domain containing, family M (with RUN domain) member 2	Multiple_Complex
TC1100000756.mm.1	8.03	8.24	-1.16	0.0233	0.3624	Alkbh5	alkB, alkylation repair homolog 5 (E. coli)	Multiple_Complex
TC0200004463.mm.1	10.72	10.93	-1.16	0.0235	0.363	Zfp106	zinc finger protein 106	Multiple_Complex
TC1100003161.mm.1	7.6	7.81	-1.16	0.0238	0.3638	Aspa	aspartoacylase	Multiple_Complex
TC1100000596.mm.1	6.74	6.96	-1.16	0.0246	0.3657	Fstl4	follistatin-like 4	Coding
TC0100000171.mm.1	12.48	12.7	-1.16	0.0246	0.3657	Lmbrd1	LMBR1 domain containing 1	Coding
TC0300003147.mm.1	6.46	6.68	-1.16	0.0251	0.3673	Ak5	adenylate kinase 5	Coding
TC0700002964.mm.1	8.3	8.52	-1.16	0.0257	0.3695	Emc10	ER membrane protein complex subunit 10	Multiple_Complex
TC1200002083.mm.1	9.89	10.1	-1.16	0.0264	0.372	Arel1	apoptosis resistant E3 ubiquitin protein ligase 1	Multiple_Complex
TC0300002074.mm.1	7.98	8.18	-1.16	0.028	0.3747	Slc33a1	solute carrier family 33 (acetyl-CoA transporter), member 1	Coding
TC0500003028.mm.1	7.78	7.99	-1.16	0.0293	0.3773	Sgsm1	small G protein signaling modulator 1; small G protein signaling modulator 1 (Sgsm1), transcript variant 2, non-coding RNA.; small G protein signaling modulator 1 (Sgsm1), transcript variant 4, long non-coding RNA.	Multiple_Complex
TC0800003008.mm.1	8.05	8.26	-1.16	0.0295	0.3778	Gcsh	glycine cleavage system protein H (aminomethyl carrier)	Multiple_Complex
TC1100002871.mm.1	9.73	9.95	-1.16	0.0299	0.3788	Tom1l2	target of myb1-like 2 (chicken)	Multiple_Complex
TC0400003650.mm.1	6.63	6.84	-1.16	0.0306	0.3804	Ptpru	protein tyrosine phosphatase, receptor type, U; Synthetic construct Mus musculus clone IMAGE:100062706, MGC:190936 protein tyrosine phosphatase, receptor type, U (Ptpru) mRNA, encodes complete protein.	Multiple_Complex
TC0500002182.mm.1	7.59	7.8	-1.16	0.0309	0.381	Ift172	intraflagellar transport 172	Coding
TC0100003010.mm.1	10.54	10.75	-1.16	0.0314	0.3829	Tmem163	transmembrane protein 163	Multiple_Complex
TC1100003583.mm.1	12.9	13.12	-1.16	0.0315	0.3829	Pdk2	pyruvate dehydrogenase kinase, isoenzyme 2	Multiple_Complex
TC1100000498.mm.1	3.81	4.02	-1.16	0.0318	0.3838	Olfr1394	olfactory receptor 1394	Coding
TC0400000275.mm.1	10.09	10.3	-1.16	0.0318	0.3838	Rragd	Ras-related GTP binding D; Synthetic construct Mus musculus clone IMAGE:100016466, MGC:184510 Ras-related GTP binding D (Rragd) mRNA, encodes complete protein.	Multiple_Complex
TC1300001911.mm.1	10.68	10.9	-1.16	0.0323	0.3841	Atxn1	ataxin 1	Multiple_Complex
TC0800002683.mm.1	6.53	6.75	-1.16	0.0334	0.387	Rpgrip1l	Rpgrip1-like; Synthetic construct Mus musculus clone IMAGE:100068064, MGC:195681 Rpgrip1-like (Rpgrip1l) mRNA, encodes complete protein.	Multiple_Complex
TC0200001359.mm.1	7.52	7.73	-1.16	0.0337	0.3871	Kbtbd4	kelch repeat and BTB (POZ) domain containing 4	Multiple_Complex
TC0100003035.mm.1	5.18	5.39	-1.16	0.0339	0.3871	Cd55b	CD55 molecule, decay accelerating factor for complement B	Multiple_Complex
TC1900000953.mm.1	8.81	9.02	-1.16	0.0341	0.3875	Klc2	kinesin light chain 2	Multiple_Complex
TC0900000534.mm.1	13.54	13.76	-1.16	0.0342	0.3875	Scn2b	sodium channel, voltage-gated, type II, beta	Multiple_Complex
TC1100000967.mm.1	10.32	10.53	-1.16	0.0352	0.3881	Rabep1	rabaptin, RAB GTPase binding effector protein 1	Multiple_Complex
TC0500001578.mm.1	10.74	10.95	-1.16	0.0355	0.3894	Baz1b	bromodomain adjacent to zinc finger domain, 1B	Multiple_Complex
TC0800001906.mm.1	8.96	9.18	-1.16	0.0361	0.3913	Tacc1; Mir8108	transforming, acidic coiled-coil containing protein 1; microRNA 8108; Synthetic construct Mus musculus clone IMAGE:100016372, MGC:184532 transforming, acidic coiled-coil containing protein 1 (Tacc1) mRNA, encodes complete protein.; transforming, acidic coiled-coil containing protein 1 (Tacc1), transcript variant 1, mRNA.	Multiple_Complex
TC1700001145.mm.1	10.65	10.87	-1.16	0.0377	0.3936	Ypel5	yippee-like 5 (Drosophila)	Coding
TC1000003148.mm.1	6.73	6.95	-1.16	0.0378	0.3936	Esyt1	extended synaptotagmin-like protein 1	Coding
TC0200001803.mm.1	10.75	10.97	-1.16	0.0383	0.3955	Ccndbp1	cyclin D-type binding-protein 1	Multiple_Complex
TC0100003371.mm.1	5.92	6.14	-1.16	0.0387	0.396	Dars2	aspartyl-tRNA synthetase 2 (mitochondrial)	Multiple_Complex
TC1000001599.mm.1	12.38	12.6	-1.16	0.0388	0.396	Cs	citrate synthase	Coding
TC0800001244.mm.1	6.77	6.98	-1.16	0.0397	0.3983	Pla2g15	phospholipase A2, group XV	Coding
TC0400003741.mm.1	7.98	8.18	-1.16	0.0399	0.3986	Sepn1	selenoprotein N, 1	Multiple_Complex
TC1100003422.mm.1	10.7	10.92	-1.16	0.0399	0.3988	Usp32	ubiquitin specific peptidase 32	Multiple_Complex
TC0200003171.mm.1	10.47	10.69	-1.16	0.0406	0.3998	Camsap1	calmodulin regulated spectrin-associated protein 1; calmodulin regulated spectrin-associated protein 1 (Camsap1), mRNA.	Multiple_Complex
TC0500001217.mm.1	8.81	9.03	-1.16	0.0407	0.4	Dao	D-amino acid oxidase	Multiple_Complex
TC0500003540.mm.1	9.46	9.67	-1.16	0.0419	0.4025	Rnf216	ring finger protein 216	Multiple_Complex
TC0700000033.mm.1	5.17	5.38	-1.16	0.042	0.4026	Eps8l1	EPS8-like 1; Synthetic construct Mus musculus clone IMAGE:100068366, MGC:195910 EPS8-like 1 (Eps8l1) mRNA, encodes complete protein.	Multiple_Complex
TC0800000533.mm.1	16.23	16.44	-1.16	0.0421	0.4031	Actg-ps1; Gm23812	actin, gamma, pseudogene 1 [Source:MGI Symbol;Acc:MGI:87907]; predicted gene, 23812 [Source:MGI Symbol;Acc:MGI:5453589]	Multiple_Complex
TC0900003326.mm.1	9.57	9.78	-1.16	0.0425	0.4042	Ccpg1	cell cycle progression 1; cell cycle progression 1 (Ccpg1), transcript variant 1, mRNA.	Multiple_Complex
TC1100000535.mm.1	8.26	8.48	-1.16	0.0436	0.4043	Tbc1d9b	TBC1 domain family, member 9B	Multiple_Complex
TC0800002381.mm.1	9.21	9.42	-1.16	0.0438	0.4043	Mau2	MAU2 chromatid cohesion factor homolog (C. elegans)	Multiple_Complex
TC0200002013.mm.1	10.61	10.83	-1.16	0.0438	0.4043	Pank2	pantothenate kinase 2	Multiple_Complex
TC0500002567.mm.1	7.76	7.97	-1.16	0.0443	0.4043	Commd8	COMM domain containing 8	Coding
TC0800001038.mm.1	9.56	9.77	-1.16	0.0447	0.4047	Cyld	cylindromatosis (turban tumor syndrome); cylindromatosis (turban tumor syndrome) (Cyld), transcript variant 4, mRNA.; cylindromatosis (turban tumor syndrome) (Cyld), transcript variant 1, mRNA.; cylindromatosis (turban tumor syndrome) (Cyld), transcript variant 2, mRNA.	Multiple_Complex
TC0400003267.mm.1	9.56	9.76	-1.16	0.0448	0.4047	Rnf11	ring finger protein 11	Multiple_Complex
TC0200001819.mm.1	6.44	6.66	-1.16	0.0453	0.4055	Wdr76	WD repeat domain 76	Multiple_Complex
TC1100000767.mm.1	6.21	6.41	-1.16	0.0461	0.4076	Dhrs7b	dehydrogenase/reductase (SDR family) member 7B	Coding
TC1500000021.mm.1	9.3	9.52	-1.16	0.048	0.411	Prkaa1	protein kinase, AMP-activated, alpha 1 catalytic subunit	Coding
TC1200001715.mm.1	12.97	13.18	-1.16	0.0481	0.411	Strn3	striatin, calmodulin binding protein 3	Coding
TC1300000894.mm.1	6.65	6.87	-1.16	0.0484	0.4111	Slc9a3	solute carrier family 9 (sodium/hydrogen exchanger), member 3	Coding
TC1700002556.mm.1	9.11	9.33	-1.16	0.0487	0.4112	Heatr5b	HEAT repeat containing 5B	Multiple_Complex
TC0100003840.mm.1	6.17	6.39	-1.16	0.0489	0.4113	Camk1g	calcium/calmodulin-dependent protein kinase I gamma	Multiple_Complex
TC0100003328.mm.1	8.37	8.59	-1.16	0.0489	0.4113	Rasal2	RAS protein activator like 2	Multiple_Complex
TC0700001913.mm.1	8.67	8.88	-1.16	0.0491	0.4113	Htra1	HtrA serine peptidase 1	Multiple_Complex
TC0800000938.mm.1	10.16	10.37	-1.16	0.0497	0.4127	Prkaca	protein kinase, cAMP dependent, catalytic, alpha; protein kinase, cAMP dependent, catalytic, alpha (Prkaca), mRNA.	Multiple_Complex
TC1000002458.mm.1	5.66	5.87	-1.15	0.0107	0.3085	Syde1	synapse defective 1, Rho GTPase, homolog 1 (C. elegans)	Coding
TC0200003300.mm.1	14.64	14.85	-1.15	0.0133	0.3242	Dnm1	dynamin 1	Multiple_Complex
TC1800001752.mm.1	10.58	10.77	-1.15	0.0135	0.3249	Tmed7	transmembrane emp24 protein transport domain containing 7	Multiple_Complex
TC0100002214.mm.1	9.53	9.73	-1.15	0.015	0.3329	Rev1	REV1 homolog (S. cerevisiae)	Coding
TC1900000665.mm.1	4.36	4.57	-1.15	0.0156	0.3334	Kazald1	Kazal-type serine peptidase inhibitor domain 1	Coding
TC1100001905.mm.1	8.42	8.63	-1.15	0.0172	0.3408	Tmem94	transmembrane protein 94	Multiple_Complex
TC1600001792.mm.1	3.68	3.88	-1.15	0.0179	0.3444	Olfr194	olfactory receptor 194	Coding
TC0400001250.mm.1	13.28	13.48	-1.15	0.018	0.3452	Pik3r3	phosphatidylinositol 3 kinase, regulatory subunit, polypeptide 3 (p55)	Multiple_Complex
TC1400000781.mm.1	6.83	7.03	-1.15	0.0198	0.3507	Pck2	phosphoenolpyruvate carboxykinase 2 (mitochondrial)	Coding
TC0700002212.mm.1	3.6	3.8	-1.15	0.0201	0.3522	Olfr1348	olfactory receptor 1348	Coding
TC1200000387.mm.1	9.85	10.04	-1.15	0.0214	0.3563	Pnpla8; Gm2027	patatin-like phospholipase domain containing 8; nuclear assembly factor 1 homolog pseudogene; predicted gene 2027 (Gm2027), non-coding RNA.	Multiple_Complex
TC1800000834.mm.1	6.01	6.2	-1.15	0.0217	0.3573	Pstpip2	proline-serine-threonine phosphatase-interacting protein 2	Coding
TC0500003055.mm.1	8.19	8.39	-1.15	0.0219	0.3585	Svop	SV2 related protein	Multiple_Complex
TC0300000736.mm.1	7.69	7.89	-1.15	0.0229	0.3614	Rit1	Ras-like without CAAX 1	Multiple_Complex
TC0800003024.mm.1	7.67	7.87	-1.15	0.0234	0.3625	Hsdl1	hydroxysteroid dehydrogenase like 1	Multiple_Complex
TC0900003307.mm.1	9.57	9.76	-1.15	0.0249	0.3664	Slc6a20a	solute carrier family 6 (neurotransmitter transporter), member 20A	Coding
TC1100002907.mm.1	8.52	8.72	-1.15	0.0254	0.3687	Aldh3a2	aldehyde dehydrogenase family 3, subfamily A2	Multiple_Complex
TC0500002504.mm.1	5.05	5.25	-1.15	0.0255	0.3688	Rbm47	RNA binding motif protein 47	Multiple_Complex
TC0500001300.mm.1	9.2	9.4	-1.15	0.0257	0.3696	Ksr2	kinase suppressor of ras 2 (Ksr2), mRNA.; kinase suppressor of ras 2	Multiple_Complex
TC0400000188.mm.1	9.13	9.33	-1.15	0.026	0.3711	Faxc	failed axon connections homolog (Drosophila)	Multiple_Complex
TC1000003113.mm.1	6.05	6.25	-1.15	0.0268	0.3726	Gli1	GLI-Kruppel family member GLI1	Coding
TC0600003185.mm.1	8.88	9.09	-1.15	0.0269	0.373	Tspan9	tetraspanin 9	Multiple_Complex
TC0100000526.mm.1	7.18	7.37	-1.15	0.0282	0.3747	Fastkd2	FAST kinase domains 2	Multiple_Complex
TC1100001882.mm.1	6.36	6.56	-1.15	0.029	0.3766	Cd300a	CD300A antigen	Multiple_Complex
TC0900003176.mm.1	5.11	5.31	-1.15	0.0295	0.3777	Cmtm7	CKLF-like MARVEL transmembrane domain containing 7; CKLF-like MARVEL transmembrane domain containing 7 (Cmtm7), transcript variant 1, mRNA.	Multiple_Complex
TC1000003050.mm.1	8.88	9.09	-1.15	0.0298	0.3787	Xpot	exportin, tRNA (nuclear export receptor for tRNAs)	Multiple_Complex
TC0500002569.mm.1	5.64	5.84	-1.15	0.0305	0.3802	Corin	corin	Multiple_Complex
TC0500001510.mm.1	10.87	11.08	-1.15	0.0318	0.3838	Gbas	glioblastoma amplified sequence; glioblastoma amplified sequence (Gbas), nuclear gene encoding mitochondrial protein, mRNA.	Multiple_Complex
TC0800000268.mm.1	9.64	9.85	-1.15	0.032	0.3838	Alg11	asparagine-linked glycosylation 11 (alpha-1,2-mannosyltransferase)	Multiple_Complex
TC1100002918.mm.1	9.76	9.96	-1.15	0.0321	0.3838	Epn2	epsin 2	Multiple_Complex
TC1300001470.mm.1	9.33	9.53	-1.15	0.0332	0.3865	Ggps1	geranylgeranyl diphosphate synthase 1	Multiple_Complex
TC0300002797.mm.1	7.86	8.05	-1.15	0.0334	0.387	S1pr1	sphingosine-1-phosphate receptor 1	Coding
TC1500002040.mm.1	9.33	9.53	-1.15	0.0337	0.3871	Plxnb2	plexin B2; plexin B2 (Plxnb2), mRNA.	Multiple_Complex
TC1200000618.mm.1	9.64	9.84	-1.15	0.0339	0.3871	Jkamp	JNK1/MAPK8-associated membrane protein	Multiple_Complex
TC0700000586.mm.1	7.22	7.42	-1.15	0.0339	0.3871	Lgi4	leucine-rich repeat LGI family, member 4	Multiple_Complex
TC1100003086.mm.1	7.01	7.21	-1.15	0.0361	0.3911	Slc16a13	solute carrier family 16 (monocarboxylic acid transporters), member 13	Coding
TC0700004639.mm.1	4.12	4.32	-1.15	0.0367	0.3928	Mia	melanoma inhibitory activity	Multiple_Complex
TC1100001247.mm.1	11.55	11.75	-1.15	0.0369	0.3932	Ap2b1	adaptor-related protein complex 2, beta 1 subunit	Multiple_Complex
TC0200000515.mm.1	9.76	9.96	-1.15	0.0377	0.3933	Odf2	outer dense fiber of sperm tails 2	Multiple_Complex
TC1500001630.mm.1	8.74	8.94	-1.15	0.0382	0.3949	Asap1	ArfGAP with SH3 domain, ankyrin repeat and PH domain1; ArfGAP with SH3 domain, ankyrin repeat and PH domain1 (Asap1), mRNA.	Multiple_Complex
TC1900001355.mm.1	7.17	7.37	-1.15	0.0382	0.3948	Gldc	glycine decarboxylase; glycine decarboxylase (Gldc), nuclear gene encoding mitochondrial protein, mRNA.	Coding
TC0200002429.mm.1	11.51	11.71	-1.15	0.0383	0.3955	Ralgapb	Ral GTPase activating protein, beta subunit (non-catalytic) (Ralgapb), mRNA.; Ral GTPase activating protein, beta subunit (non-catalytic)	Multiple_Complex
TC1700002800.mm.1	10.18	10.38	-1.15	0.0392	0.3965	Mapk8ip3	mitogen-activated protein kinase 8 interacting protein 3	Multiple_Complex
TC0600000325.mm.1	7.33	7.53	-1.15	0.0397	0.3983	Akr1b10	aldo-keto reductase family 1, member B10 (aldose reductase); aldo-keto reductase family 1, member B10 (aldose reductase) (Akr1b10), mRNA.	Multiple_Complex
TC0100001193.mm.1	8.18	8.38	-1.15	0.0397	0.3983	Dstyk	dual serine/threonine and tyrosine protein kinase	Multiple_Complex
TC0X00001617.mm.1	12.35	12.56	-1.15	0.0402	0.3989	Eif1ax	eukaryotic translation initiation factor 1A, X-linked	Multiple_Complex
TC0800001349.mm.1	9.92	10.12	-1.15	0.0416	0.4017	Cntnap4	contactin associated protein-like 4	Multiple_Complex
TC1400002215.mm.1	6.69	6.89	-1.15	0.0424	0.4042	Fdft1	farnesyl diphosphate farnesyl transferase 1	Multiple_Complex
TC1000000292.mm.1	5.49	5.7	-1.15	0.0425	0.4042	Rsph4a	radial spoke head 4 homolog A (Chlamydomonas)	Multiple_Complex
TC0500003373.mm.1	7.47	7.68	-1.15	0.0427	0.4043	Clip2	CAP-GLY domain containing linker protein 2	Coding
TC0300000767.mm.1	6.11	6.31	-1.15	0.0429	0.4043	Kcnn3	potassium intermediate/small conductance calcium-activated channel, subfamily N, member 3	Multiple_Complex
TC0400004066.mm.1	7.17	7.37	-1.15	0.0433	0.4043	Slc45a1	solute carrier family 45, member 1	Multiple_Complex
TC0200004842.mm.1	8.9	9.1	-1.15	0.0434	0.4043	Apmap	adipocyte plasma membrane associated protein	Multiple_Complex
TC0800001613.mm.1	11.89	12.09	-1.15	0.0435	0.4043	Pcp2	Purkinje cell protein 2 (L7)	Multiple_Complex
TC1900001107.mm.1	5.99	6.19	-1.15	0.0437	0.4043	Tmem138	transmembrane protein 138	Multiple_Complex
TC0200002517.mm.1	10.65	10.85	-1.15	0.0442	0.4043	Pigt	phosphatidylinositol glycan anchor biosynthesis, class T	Multiple_Complex
TC1900001505.mm.1	12.04	12.24	-1.15	0.0442	0.4043	Tm9sf3	transmembrane 9 superfamily member 3	Multiple_Complex
TC0600000655.mm.1	7.61	7.82	-1.15	0.0444	0.4043	Plekha8	pleckstrin homology domain containing, family A (phosphoinositide binding specific) member 8	Multiple_Complex
TC1900000046.mm.1	10.43	10.63	-1.15	0.0449	0.4048	Ctsf	cathepsin F	Coding
TC0500000385.mm.1	9.52	9.72	-1.15	0.0454	0.4055	Htt	huntingtin	Multiple_Complex
TC1800000646.mm.1	6.56	6.76	-1.15	0.0465	0.4078	Apcdd1	adenomatosis polyposis coli down-regulated 1; adenomatosis polyposis coli down-regulated 1 (Apcdd1), mRNA.	Multiple_Complex
TC1800001701.mm.1	7.81	8.02	-1.15	0.0475	0.4095	Zfp407	zinc finger protein 407	Multiple_Complex
TC0800002617.mm.1	12.22	12.41	-1.15	0.0483	0.411	Dnaja2	DnaJ (Hsp40) homolog, subfamily A, member 2	Multiple_Complex
TC1100000644.mm.1	8.85	9.05	-1.15	0.0487	0.4112	Slc36a1	solute carrier family 36 (proton/amino acid symporter), member 1	Multiple_Complex
TC0100003710.mm.1	8.17	8.38	-1.15	0.0497	0.4127	Fbxo28	F-box protein 28	Multiple_Complex
TC0900000141.mm.1	3.81	4.01	-1.14	0.0116	0.3132	Olfr832	olfactory receptor 832	Coding
TC1300001131.mm.1	7.3	7.49	-1.14	0.0132	0.3242	Mrps27	mitochondrial ribosomal protein S27	Coding
TC0600000240.mm.1	7.28	7.47	-1.14	0.0159	0.3348	Tspan33	tetraspanin 33	Multiple_Complex
TC1700000182.mm.1	7.45	7.64	-1.14	0.017	0.3404	Fam120b	family with sequence similarity 120, member B	Multiple_Complex
TC1800000468.mm.1	7.97	8.16	-1.14	0.0177	0.3433	Kcnn2	potassium intermediate/small conductance calcium-activated channel, subfamily N, member 2	Multiple_Complex
TC0900003062.mm.1	7.59	7.78	-1.14	0.0188	0.3478	Ndufaf3	NADH dehydrogenase (ubiquinone) 1 alpha subcomplex, assembly factor 3	Coding
TC0600000158.mm.1	15.57	15.76	-1.14	0.0196	0.3501	Kcnd2	potassium voltage-gated channel, Shal-related family, member 2	Coding
TC1700001652.mm.1	6.35	6.54	-1.14	0.02	0.3521	Tmem204	transmembrane protein 204	Coding
TC0800002595.mm.1	9.65	9.84	-1.14	0.0211	0.3558	Mast1	microtubule associated serine/threonine kinase 1	Multiple_Complex
TC1700001615.mm.1	9.62	9.8	-1.14	0.0214	0.3563	Pdpk1	3-phosphoinositide dependent protein kinase 1	Multiple_Complex
TC1100001063.mm.1	7.14	7.33	-1.14	0.022	0.3585	Rtn4rl1	reticulon 4 receptor-like 1	Coding
TC1500001347.mm.1	8.15	8.34	-1.14	0.0222	0.3596	Hrsp12	heat-responsive protein 12	Multiple_Complex
TC1700001132.mm.1	7	7.18	-1.14	0.0231	0.3614	Lpin2	lipin 2	Multiple_Complex
TC0200002632.mm.1	5.6	5.79	-1.14	0.025	0.3667	Tshz2	teashirt zinc finger family member 2	Multiple_Complex
TC1300002596.mm.1	10.34	10.53	-1.14	0.0251	0.3672	Trappc13	trafficking protein particle complex 13	Multiple_Complex
TC0900002991.mm.1	10.5	10.69	-1.14	0.0269	0.373	Atp2c1	ATPase, Ca++-sequestering	Multiple_Complex
TC0600002221.mm.1	7.54	7.73	-1.14	0.0274	0.3734	Zfp467	zinc finger protein 467	Multiple_Complex
TC1900000082.mm.1	7.75	7.94	-1.14	0.0275	0.3735	Ltbp3	latent transforming growth factor beta binding protein 3; Synthetic construct Mus musculus clone IMAGE:100068370, MGC:195914 latent transforming growth factor beta binding protein 3 (Ltbp3) mRNA, encodes complete protein.	Coding
TC0600002141.mm.1	3.64	3.83	-1.14	0.0279	0.3747	Olfr461	olfactory receptor 461	Coding
TC0300001616.mm.1	9.86	10.04	-1.14	0.0282	0.3747	Hey1	hairy/enhancer-of-split related with YRPW motif 1	Coding
TC1800000347.mm.1	10.7	10.89	-1.14	0.0288	0.3763	Zmat2	zinc finger, matrin type 2	Multiple_Complex
TC1500002039.mm.1	6.73	6.93	-1.14	0.0292	0.3771	Mapk11	mitogen-activated protein kinase 11	Coding
TC1000001656.mm.1	4.32	4.52	-1.14	0.0293	0.3776	Olfr813	olfactory receptor 813	Coding
TC0900001411.mm.1	10.7	10.89	-1.14	0.0296	0.3778	Qrich1	glutamine-rich 1	Coding
TC1600001983.mm.1	8.99	9.19	-1.14	0.0298	0.3787	Ltn1	listerin E3 ubiquitin protein ligase 1; listerin E3 ubiquitin protein ligase 1 (Ltn1), mRNA.	Multiple_Complex
TC0200005155.mm.1	9.27	9.46	-1.14	0.0302	0.3793	Zmynd8	zinc finger, MYND-type containing 8; zinc finger, MYND-type containing 8 (Zmynd8), transcript variant 1, mRNA.	Multiple_Complex
TC0100002833.mm.1	11.29	11.47	-1.14	0.0304	0.38	Hdlbp	high density lipoprotein (HDL) binding protein	Multiple_Complex
TC1800001577.mm.1	10.02	10.21	-1.14	0.0306	0.3804	Smad4	SMAD family member 4	Multiple_Complex
TC0300001423.mm.1	12.36	12.54	-1.14	0.0306	0.3804	Tspan5	tetraspanin 5	Multiple_Complex
TC1400000942.mm.1	11.71	11.9	-1.14	0.0309	0.381	Clu	clusterin	Multiple_Complex
TC0900001335.mm.1	12.28	12.48	-1.14	0.0314	0.3829	Wdr82	WD repeat domain containing 82	Multiple_Complex
TC1200002267.mm.1	10.04	10.23	-1.14	0.0317	0.3835	Ddx24	DEAD (Asp-Glu-Ala-Asp) box polypeptide 24	Coding
TC0800001185.mm.1	6.59	6.78	-1.14	0.0322	0.3838	Car7	carbonic anhydrase 7	Multiple_Complex
TC0800000392.mm.1	12.16	12.35	-1.14	0.0324	0.3845	Ppp2cb	protein phosphatase 2 (formerly 2A), catalytic subunit, beta isoform	Coding
TC0600000834.mm.1	9.99	10.18	-1.14	0.0335	0.3871	Reep1	receptor accessory protein 1	Coding
TC0500001528.mm.1	7.94	8.12	-1.14	0.0336	0.3871	Tmem248	transmembrane protein 248	Multiple_Complex
TC0300000550.mm.1	9.38	9.58	-1.14	0.0342	0.3875	Gfm1	G elongation factor, mitochondrial 1	Multiple_Complex
TC0900000100.mm.1	11.4	11.59	-1.14	0.0343	0.3875	Sesn3	sestrin 3	Multiple_Complex
TC1600001214.mm.1	11.26	11.46	-1.14	0.0352	0.3881	Gspt1	G1 to S phase transition 1	Multiple_Complex
TC0300003221.mm.1	8.1	8.29	-1.14	0.0352	0.3881	Wdr77	WD repeat domain 77	Multiple_Complex
TC0700000410.mm.1	9.76	9.95	-1.14	0.0362	0.3916	Cic	capicua homolog (Drosophila) (Cic), transcript variant 2, mRNA.; capicua homolog (Drosophila) (Cic), transcript variant 3, mRNA.; capicua homolog (Drosophila)	Multiple_Complex
TC0500003254.mm.1	11.52	11.71	-1.14	0.0364	0.3918	Sbno1	sno, strawberry notch homolog 1 (Drosophila)	Multiple_Complex
TC1600000307.mm.1	9.8	9.98	-1.14	0.0365	0.3923	Senp2	SUMO/sentrin specific peptidase 2	Multiple_Complex
TC1600001245.mm.1	12.05	12.24	-1.14	0.0371	0.3932	Marf1	meiosis arrest female 1	Multiple_Complex
TC1500001887.mm.1	9.29	9.47	-1.14	0.0372	0.3932	Npcd; Cbx6; Nptxr	neuronal pentraxin chromo domain; chromobox 6; neuronal pentraxin receptor	Multiple_Complex
TC1100000324.mm.1	12.86	13.05	-1.14	0.0374	0.3932	Cpeb4	cytoplasmic polyadenylation element binding protein 4	Multiple_Complex
TC0X00001700.mm.1	4.75	4.94	-1.14	0.0377	0.3936	Arhgap6	Rho GTPase activating protein 6; Synthetic construct Mus musculus clone IMAGE:100016375, MGC:184543 Rho GTPase activating protein 6 (Arhgap6) mRNA, encodes complete protein.; Rho GTPase activating protein 6 (Arhgap6), transcript variant 1, mRNA.; Rho GTPase activating protein 6 (Arhgap6), transcript variant 2, mRNA.	Multiple_Complex
TC0500002859.mm.1	11.53	11.72	-1.14	0.0377	0.3932	Wdfy3	WD repeat and FYVE domain containing 3	Multiple_Complex
TC0X00001402.mm.1	6.91	7.11	-1.14	0.0387	0.396	Nxt2	nuclear transport factor 2-like export factor 2	Multiple_Complex
TC0400003892.mm.1	7.4	7.58	-1.14	0.0389	0.396	Dnajc16	DnaJ (Hsp40) homolog, subfamily C, member 16	Multiple_Complex
TC0800000796.mm.1	8.07	8.26	-1.14	0.0391	0.3962	Slc27a1	solute carrier family 27 (fatty acid transporter), member 1	Coding
TC0200004130.mm.1	10.91	11.09	-1.14	0.0398	0.3983	Dgkz	diacylglycerol kinase zeta	Multiple_Complex
TC0200002367.mm.1	7.4	7.6	-1.14	0.04	0.3988	Acss2	acyl-CoA synthetase short-chain family member 2	Multiple_Complex
TC1600002181.mm.1	7.39	7.58	-1.14	0.04	0.3988	Dgcr2	DiGeorge syndrome critical region gene 2; DiGeorge syndrome critical region gene 2 ,predicted gene 20518	Multiple_Complex
TC0500000648.mm.1	11.08	11.27	-1.14	0.0401	0.3989	Slc30a9	solute carrier family 30 (zinc transporter), member 9	Multiple_Complex
TC0X00000313.mm.1	7.51	7.7	-1.14	0.0403	0.3992	Dock11	dedicator of cytokinesis 11	Multiple_Complex
TC1400001036.mm.1	11.37	11.56	-1.14	0.0404	0.3994	Sucla2	succinate-Coenzyme A ligase, ADP-forming, beta subunit	Multiple_Complex
TC0400000084.mm.1	7.35	7.54	-1.14	0.0406	0.3998	Trp53inp1	transformation related protein 53 inducible nuclear protein 1	Multiple_Complex
TC1700001631.mm.1	8.91	9.1	-1.14	0.0407	0.4	Mlst8	MTOR associated protein, LST8 homolog (S. cerevisiae)	Coding
TC0100000064.mm.1	8.18	8.37	-1.14	0.0408	0.4004	Sulf1	sulfatase 1	Multiple_Complex
TC0X00002266.mm.1	9.93	10.12	-1.14	0.0414	0.4013	Mmgt1; Mir5116	membrane magnesium transporter 1; microRNA 5116	Multiple_Complex
TC0100003051.mm.1	8.46	8.66	-1.14	0.0419	0.4025	Mapkapk2	MAP kinase-activated protein kinase 2	Multiple_Complex
TC0800002824.mm.1	12.65	12.84	-1.14	0.0422	0.4032	Atp6v0d1	ATPase, H+ transporting, lysosomal V0 subunit D1	Multiple_Complex
TC0400003237.mm.1	10.87	11.06	-1.14	0.0426	0.4043	Zyg11b	zyg-ll family member B, cell cycle regulator	Multiple_Complex
TC1800000047.mm.1	9.15	9.33	-1.14	0.0431	0.4043	Rab18	RAB18, member RAS oncogene family	Multiple_Complex
TC1500000679.mm.1	9.55	9.73	-1.14	0.0432	0.4043	Gtpbp1	GTP binding protein 1	Coding
TC0900000888.mm.1	10.72	10.92	-1.14	0.0435	0.4043	Vps13c	vacuolar protein sorting 13C (yeast)	Multiple_Complex
TC1100002007.mm.1	8.61	8.8	-1.14	0.0443	0.4043	Rptor	regulatory associated protein of MTOR, complex 1	Multiple_Complex
TC0700002005.mm.1	4.11	4.29	-1.14	0.0444	0.4043	Olfr523	olfactory receptor 523	Coding
TC0400001215.mm.1	4.51	4.7	-1.14	0.0448	0.4047	Stil	Scl/Tal1 interrupting locus	Multiple_Complex
TC0500002268.mm.1	8.4	8.59	-1.14	0.046	0.4075	Wfs1	Wolfram syndrome 1 homolog (human)	Coding
TC0X00000396.mm.1	8.81	9	-1.14	0.0462	0.4076	Xiap	X-linked inhibitor of apoptosis	Multiple_Complex
TC0500001389.mm.1	9.3	9.49	-1.14	0.0463	0.4076	Vps29	vacuolar protein sorting 29 (S. pombe)	Multiple_Complex
TC1500001944.mm.1	7.83	8.02	-1.14	0.0465	0.4078	Cyp2d22	cytochrome P450, family 2, subfamily d, polypeptide 22	Coding
TC0600003165.mm.1	11.43	11.61	-1.14	0.0467	0.4083	Ndufa9	NADH dehydrogenase (ubiquinone) 1 alpha subcomplex, 9	Coding
TC1200000321.mm.1	6.86	7.05	-1.14	0.0475	0.4096	Sostdc1	sclerostin domain containing 1	Multiple_Complex
TC0X00002400.mm.1	9.12	9.32	-1.14	0.0487	0.4112	Cd99l2	CD99 antigen-like 2	Multiple_Complex
TC1000002828.mm.1	14.8	14.99	-1.14	0.0493	0.4115	Syt1	synaptotagmin I	Multiple_Complex
TC0100000711.mm.1	12.23	12.4	-1.13	0.0163	0.3368	Agfg1	ArfGAP with FG repeats 1	Multiple_Complex
TC0900002870.mm.1	7.51	7.68	-1.13	0.0182	0.3464	Pls1	plastin 1 (I-isoform)	Multiple_Complex
TC1800001138.mm.1	7.5	7.68	-1.13	0.0188	0.3478	Stard4	StAR-related lipid transfer (START) domain containing 4	Multiple_Complex
TC0300001347.mm.1	9.83	10.01	-1.13	0.0193	0.3488	Tbck	TBC1 domain containing kinase; TBC1 domain containing kinase (Tbck), transcript variant 2, mRNA.	Coding
TC1900000071.mm.1	6.92	7.09	-1.13	0.0201	0.3521	Efemp2	epidermal growth factor-containing fibulin-like extracellular matrix protein 2	Multiple_Complex
TC0600002773.mm.1	9.24	9.42	-1.13	0.0211	0.3558	Lrig1	leucine-rich repeats and immunoglobulin-like domains 1; leucine-rich repeats and immunoglobulin-like domains 1 (Lrig1), mRNA.	Multiple_Complex
TC0900001009.mm.1	12.35	12.52	-1.13	0.0238	0.3638	Myo5a	myosin VA	Multiple_Complex
TC0800002175.mm.1	9.6	9.77	-1.13	0.0247	0.366	Trappc11	trafficking protein particle complex 11	Multiple_Complex
TC0100001358.mm.1	10.18	10.35	-1.13	0.0252	0.3673	Edem3	ER degradation enhancer, mannosidase alpha-like 3	Multiple_Complex
TC1800000655.mm.1	10.43	10.61	-1.13	0.0262	0.3713	Wdr7	WD repeat domain 7	Coding
TC1200001369.mm.1	9.54	9.72	-1.13	0.0267	0.3726	Ubxn2a	UBX domain protein 2A	Coding
TC0300001092.mm.1	8.37	8.55	-1.13	0.027	0.373	Kcnd3	potassium voltage-gated channel, Shal-related family, member 3	Multiple_Complex
TC1300002318.mm.1	11.85	12.02	-1.13	0.0277	0.3741	Sdha	succinate dehydrogenase complex, subunit A, flavoprotein (Fp)	Multiple_Complex
TC1100000343.mm.1	7.55	7.74	-1.13	0.0295	0.3777	Stk10	serine/threonine kinase 10	Multiple_Complex
TC0200001371.mm.1	8.8	8.98	-1.13	0.0301	0.3793	Acp2	acid phosphatase 2, lysosomal	Multiple_Complex
TC0400001930.mm.1	9.12	9.3	-1.13	0.0302	0.3793	Mtor	mechanistic target of rapamycin (serine/threonine kinase)	Multiple_Complex
TC1100001634.mm.1	12.93	13.11	-1.13	0.0303	0.3794	Atp6v0a1	ATPase, H+ transporting, lysosomal V0 subunit A1	Multiple_Complex
TC0900000544.mm.1	8.51	8.68	-1.13	0.0305	0.3802	Bace1	beta-site APP cleaving enzyme 1	Multiple_Complex
TC1800000232.mm.1	8.89	9.06	-1.13	0.0308	0.381	Pik3c3	phosphoinositide-3-kinase, class 3	Multiple_Complex
TC0300002716.mm.1	13.65	13.83	-1.13	0.0318	0.3838	Ahcyl1	S-adenosylhomocysteine hydrolase-like 1	Multiple_Complex
TC0500002592.mm.1	7.43	7.61	-1.13	0.0319	0.3838	Ociad2	OCIA domain containing 2	Multiple_Complex
TC0500000689.mm.1	8.72	8.9	-1.13	0.033	0.3865	Dcun1d4	DCN1, defective in cullin neddylation 1, domain containing 4 (S. cerevisiae)	Multiple_Complex
TC1600000117.mm.1	9.4	9.58	-1.13	0.0331	0.3865	Clec16a	C-type lectin domain family 16, member A	Multiple_Complex
TC0300002242.mm.1	9.08	9.26	-1.13	0.0332	0.3865	Trim2	tripartite motif-containing 2	Multiple_Complex
TC0700002224.mm.1	7.05	7.22	-1.13	0.0332	0.3865	Vmn2r29	vomeronasal 2, receptor 29	Multiple_Complex
TC0500003733.mm.1	10.25	10.42	-1.13	0.0332	0.3865	Zfp644	zinc finger protein 644	Multiple_Complex
TC0700003608.mm.1	6.27	6.44	-1.13	0.0333	0.3866	Cpeb1	cytoplasmic polyadenylation element binding protein 1	Multiple_Complex
TC1500002214.mm.1	14.56	14.73	-1.13	0.0333	0.3865	Faim2	Fas apoptotic inhibitory molecule 2; Fas apoptotic inhibitory molecule 2 (Faim2), transcript variant 2, mRNA.	Coding
TC1800000357.mm.1	4.76	4.93	-1.13	0.0333	0.3866	Pcdhb3	protocadherin beta 3	Coding
TC0600000925.mm.1	9.37	9.55	-1.13	0.0338	0.3871	Dctn1	dynactin 1	Multiple_Complex
TC1600001296.mm.1	9.03	9.21	-1.13	0.0338	0.3871	Med15	mediator complex subunit 15; mediator complex subunit 15 (Med15), transcript variant 1, mRNA.; mediator complex subunit 15 (Med15), transcript variant 2, mRNA.	Multiple_Complex
TC1200000074.mm.1	7.6	7.77	-1.13	0.0344	0.3875	Wdr35	WD repeat domain 35	Multiple_Complex
TC0900002156.mm.1	8.17	8.35	-1.13	0.0348	0.3875	C2cd2l	C2 calcium-dependent domain containing 2-like	Coding
TC1300000534.mm.1	11.01	11.19	-1.13	0.0348	0.3875	Cap2	CAP, adenylate cyclase-associated protein, 2 (yeast)	Multiple_Complex
TC0200002827.mm.1	11.01	11.18	-1.13	0.0357	0.39	Dnajc5	DnaJ (Hsp40) homolog, subfamily C, member 5; DnaJ (Hsp40) homolog, subfamily C, member 5 (Dnajc5), mRNA.	Multiple_Complex
TC1200000567.mm.1	11.58	11.75	-1.13	0.0358	0.3903	Klhdc2	kelch domain containing 2	Multiple_Complex
TC1500001585.mm.1	9.94	10.12	-1.13	0.0361	0.3912	Mtss1	metastasis suppressor 1	Multiple_Complex
TC0X00001383.mm.1	7.94	8.12	-1.13	0.0366	0.3923	Mid2	midline 2; Synthetic construct Mus musculus clone IMAGE:100015022, MGC:180339 midline 2 (Mid2) mRNA, encodes complete protein.	Multiple_Complex
TC0X00003399.mm.1	7.97	8.15	-1.13	0.0366	0.3923	Sh3bgrl	SH3-binding domain glutamic acid-rich protein like	Multiple_Complex
TC0300003020.mm.1	9.51	9.69	-1.13	0.0369	0.3932	Metap1	methionyl aminopeptidase 1	Coding
TC0200000567.mm.1	10.35	10.52	-1.13	0.0369	0.3932	Prrc2b	proline-rich coiled-coil 2B	Multiple_Complex
TC0400002613.mm.1	10.42	10.59	-1.13	0.0382	0.395	Alg2	asparagine-linked glycosylation 2 (alpha-1,3-mannosyltransferase)	Multiple_Complex
TC1800000825.mm.1	11.82	11.99	-1.13	0.0385	0.396	Pias2	protein inhibitor of activated STAT 2	Multiple_Complex
TC0800000945.mm.1	7.2	7.37	-1.13	0.0386	0.396	Rfx1	regulatory factor X, 1 (influences HLA class II expression)	Coding
TC0700002088.mm.1	16.4	16.58	-1.13	0.0392	0.3965	Cd81	CD81 antigen	Multiple_Complex
TC0600000714.mm.1	10.7	10.88	-1.13	0.0407	0.4	Herc3	hect domain and RLD 3	Multiple_Complex
TC1600000278.mm.1	8.95	9.13	-1.13	0.0409	0.4004	Dvl3	dishevelled 3, dsh homolog (Drosophila); Synthetic construct Mus musculus clone IMAGE:100016399, MGC:184544 dishevelled 3, dsh homolog (Drosophila) (Dvl3) mRNA, encodes complete protein.	Multiple_Complex
TC1000001549.mm.1	10.42	10.59	-1.13	0.0424	0.4042	Agap2	ArfGAP with GTPase domain, ankyrin repeat and PH domain 2; Synthetic construct Mus musculus clone IMAGE:100062535, MGC:190907 ArfGAP with GTPase domain, ankyrin repeat and PH domain 2 (Agap2) mRNA, encodes complete protein.	Multiple_Complex
TC0100003877.mm.1	6.68	6.85	-1.13	0.0425	0.4042	Kdelc1	KDEL (Lys-Asp-Glu-Leu) containing 1	Multiple_Complex
TC0300001805.mm.1	7.91	8.09	-1.13	0.0436	0.4043	Pex5l	peroxisomal biogenesis factor 5-like; peroxisomal biogenesis factor 5-like (Pex5l), transcript variant 1, mRNA.; peroxisomal biogenesis factor 5-like (Pex5l), transcript variant 2, mRNA.	Multiple_Complex
TC0400004009.mm.1	8.71	8.89	-1.13	0.0445	0.4043	Clcn6	chloride channel, voltage-sensitive 6; chloride channel 6	Multiple_Complex
TC0800002799.mm.1	8.25	8.43	-1.13	0.0463	0.4076	Cmtm4	CKLF-like MARVEL transmembrane domain containing 4	Multiple_Complex
TC1400001783.mm.1	7.67	7.84	-1.13	0.0471	0.4089	Tspan14	tetraspanin 14	Multiple_Complex
TC1900001556.mm.1	4.92	5.09	-1.13	0.0473	0.4093	Pkd2l1	polycystic kidney disease 2-like 1	Multiple_Complex
TC0100001387.mm.1	14.06	14.23	-1.13	0.0476	0.4098	Glul; Mir8114	glutamate-ammonia ligase (glutamine synthetase); microRNA 8114	Multiple_Complex
TC0500003000.mm.1	9.48	9.66	-1.13	0.0485	0.4111	Ulk1	unc-51 like kinase 1	Multiple_Complex
TC0700001451.mm.1	8.72	8.9	-1.13	0.0492	0.4114	Stim1	stromal interaction molecule 1	Multiple_Complex
TC0800000472.mm.1	11.89	12.07	-1.13	0.0493	0.4115	Micu3	mitochondrial calcium uptake family, member 3	Multiple_Complex
TC0900000725.mm.1	5.78	5.94	-1.12	0.0243	0.3655	Stra6	stimulated by retinoic acid gene 6	Multiple_Complex
TC0100003612.mm.1	7.19	7.35	-1.12	0.0287	0.3759	Chml	choroideremia-like	Multiple_Complex
TC0500003168.mm.1	7.14	7.31	-1.12	0.0287	0.3759	Plbd2	phospholipase B domain containing 2	Multiple_Complex
TC0900000737.mm.1	13.11	13.28	-1.12	0.0296	0.3779	Nptn	neuroplastin	Multiple_Complex
TC1200002445.mm.1	5.3	5.47	-1.12	0.0302	0.3793	Nudt14	nudix (nucleoside diphosphate linked moiety X)-type motif 14	Coding
TC1300002588.mm.1	10.13	10.3	-1.12	0.0305	0.3801	Erbb2ip	Erbb2 interacting protein; Erbb2 interacting protein (Erbb2ip), transcript variant 2, mRNA.	Multiple_Complex
TC0900000976.mm.1	13.31	13.48	-1.12	0.0334	0.3871	Nedd4	neural precursor cell expressed, developmentally down-regulated 4	Multiple_Complex
TC0100003422.mm.1	17.41	17.57	-1.12	0.0352	0.3881	Atp1b1	ATPase, Na+/K+ transporting, beta 1 polypeptide	Coding
TC1900000645.mm.1	7.97	8.12	-1.12	0.0355	0.3892	Scd3	stearoyl-coenzyme A desaturase 3	Coding
TC0700002498.mm.1	9.44	9.61	-1.12	0.0372	0.3932	Tomm40	translocase of outer mitochondrial membrane 40 homolog (yeast)	Multiple_Complex
TC0100000462.mm.1	12.22	12.38	-1.12	0.0373	0.3932	Bmpr2	bone morphogenetic protein receptor, type II (serine/threonine kinase); Synthetic construct Mus musculus clone IMAGE:100062725, MGC:190942 bone morphogenic protein receptor, type II (serine/threonine kinase) (Bmpr2) mRNA, encodes complete protein.	Multiple_Complex
TC0700001406.mm.1	7.33	7.49	-1.12	0.0382	0.3948	C2cd3	C2 calcium-dependent domain containing 3	Multiple_Complex
TC1300000897.mm.1	8.74	8.91	-1.12	0.0387	0.396	Ccdc127	coiled-coil domain containing 127	Multiple_Complex
TC1900000382.mm.1	9.9	10.07	-1.12	0.0392	0.3964	Ptar1	protein prenyltransferase alpha subunit repeat containing 1	Coding
TC0600003375.mm.1	14.86	15.02	-1.12	0.0393	0.397	Ldhb	lactate dehydrogenase B	Multiple_Complex
TC1100001054.mm.1	7.59	7.75	-1.12	0.0398	0.3985	Smg6	Smg-6 homolog, nonsense mediated mRNA decay factor (C. elegans)	Multiple_Complex
TC0400003152.mm.1	10.46	10.62	-1.12	0.04	0.3988	Jak1	Janus kinase 1	Multiple_Complex
TC1000002438.mm.1	7.86	8.02	-1.12	0.0422	0.4033	Pfkl	phosphofructokinase, liver, B-type	Multiple_Complex
TC1300000990.mm.1	10.01	10.18	-1.12	0.0426	0.4043	Ccnh	cyclin H	Multiple_Complex
TC1600001303.mm.1	7.27	7.43	-1.12	0.0433	0.4043	Slc25a1	solute carrier family 25 (mitochondrial carrier, citrate transporter), member 1	Multiple_Complex
TC0700002571.mm.1	3.88	4.03	-1.12	0.0433	0.4043	Vmn1r158	vomeronasal 1 receptor 158	Coding
TC1500001302.mm.1	11.63	11.79	-1.12	0.0435	0.4043	Trio	triple functional domain (PTPRF interacting)	Multiple_Complex
TC0X00003270.mm.1	9.86	10.02	-1.12	0.0438	0.4043	Pdha1	pyruvate dehydrogenase E1 alpha 1	Multiple_Complex
TC1400000326.mm.1	8.76	8.92	-1.12	0.0448	0.4047	Bap1	Brca1 associated protein 1	Coding
TC1100004084.mm.1	10.47	10.64	-1.12	0.0452	0.4055	Grb2	growth factor receptor bound protein 2	Coding
TC1000000143.mm.1	3.01	3.18	-1.12	0.0457	0.4066	Il22ra2	interleukin 22 receptor, alpha 2	Coding
TC0800002425.mm.1	7.35	7.51	-1.12	0.0458	0.4069	Abhd8	abhydrolase domain containing 8	Coding
TC1100003059.mm.1	7.11	7.27	-1.12	0.0461	0.4076	Tnfsfm13; Tnfsf13; Tnfsf12	tumor necrosis factor (ligand) superfamily, membrane-bound member 13; tumor necrosis factor (ligand) superfamily, member 13; tumor necrosis factor (ligand) superfamily, member 12	Coding
TC0500003410.mm.1	8.34	8.51	-1.12	0.0461	0.4076	Ywhag	tyrosine 3-monooxygenase/tryptophan 5-monooxygenase activation protein, gamma polypeptide; tyrosine 3-monooxygenase/tryptophan 5-monooxygenase activation protein, gamma polypeptide (Ywhag), mRNA.	Multiple_Complex
TC0200002396.mm.1	6.06	6.22	-1.12	0.0464	0.4077	Aar2	AAR2 splicing factor homolog (S. cerevisiae)	Multiple_Complex
TC0200001127.mm.1	10.89	11.05	-1.12	0.0467	0.4083	Osbpl6	oxysterol binding protein-like 6	Multiple_Complex
TC1900000040.mm.1	7.77	7.94	-1.12	0.0472	0.4092	Pcx	pyruvate carboxylase	Multiple_Complex
TC0300000906.mm.1	8.41	8.57	-1.12	0.0475	0.4096	Golph3l	golgi phosphoprotein 3-like	Multiple_Complex
TC0700003643.mm.1	3.95	4.11	-1.12	0.0486	0.4112	Cfap161	cilia and flagella associated protein 161	Coding
TC0800001520.mm.1	12.01	12.18	-1.12	0.0496	0.4122	Tcf25	transcription factor 25 (basic helix-loop-helix); transcription factor 25 (basic helix-loop-helix) (Tcf25), transcript variant 3, mRNA.; transcription factor 25 (basic helix-loop-helix) (Tcf25), transcript variant 2, mRNA.	Multiple_Complex
TC0300003246.mm.1	5.54	5.7	-1.12	0.0497	0.4128	Gstm3	glutathione S-transferase, mu 3	Coding
TC0700000526.mm.1	9.11	9.27	-1.12	0.0497	0.4127	Yif1b	Yip1 interacting factor homolog B (S. cerevisiae)	Multiple_Complex
TC0800001301.mm.1	11.2	11.36	-1.12	0.0498	0.4129	Ap1g1	adaptor protein complex AP-1, gamma 1 subunit; adaptor protein complex AP-1, gamma 1 subunit (Ap1g1), mRNA.	Multiple_Complex
TC0700004179.mm.1	12.14	12.28	-1.11	0.0295	0.3777	Gprc5b	G protein-coupled receptor, family C, group 5, member B	Coding
TC0200002157.mm.1	10.07	10.22	-1.11	0.0323	0.3841	Slc24a3	solute carrier family 24 (sodium/potassium/calcium exchanger), member 3	Multiple_Complex
TC1600002180.mm.1	8.36	8.51	-1.11	0.0346	0.3875	Car15	carbonic anhydrase 15	Coding
TC0X00002461.mm.1	3.59	3.73	-1.11	0.0373	0.3932	Olfr1327-ps1	olfactory receptor 1327, pseudogene 1	Multiple_Complex
TC1100001543.mm.1	9.33	9.48	-1.11	0.0379	0.3939	Mllt6	myeloid/lymphoid or mixed-lineage leukemia (trithorax homolog, Drosophila); translocated to, 6; Synthetic construct Mus musculus clone IMAGE:100016297, MGC:184480 myeloid/lymphoid or mixed-lineage leukemia (trithorax homolog, Drosophila); translocated to, 6 (Mllt6) mRNA, encodes complete protein.	Multiple_Complex
TC1100000738.mm.1	7.77	7.93	-1.11	0.0381	0.3948	Nt5m	5,3-nucleotidase, mitochondrial; 5',3'-nucleotidase, mitochondrial	Multiple_Complex
TC0500002488.mm.1	8.18	8.34	-1.11	0.0386	0.396	Smim14	small integral membrane protein 14	Multiple_Complex
TC0200004725.mm.1	8.65	8.8	-1.11	0.0387	0.396	Tasp1	taspase, threonine aspartase 1; taspase, threonine aspartase 1 (Tasp1), transcript variant 1, mRNA.; taspase, threonine aspartase 1 (Tasp1), transcript variant 2, mRNA.; taspase, threonine aspartase 1 (Tasp1), transcript variant 3, mRNA.	Multiple_Complex
TC0400002141.mm.1	11.24	11.39	-1.11	0.0394	0.3975	Impad1	inositol monophosphatase domain containing 1	Multiple_Complex
TC0500001894.mm.1	8.01	8.16	-1.11	0.0395	0.3979	Cyp51	cytochrome P450, family 51	Multiple_Complex
TC0600002116.mm.1	10.84	11	-1.11	0.0397	0.3983	Kdm7a	lysine (K)-specific demethylase 7A	Multiple_Complex
TC1400001499.mm.1	11.58	11.73	-1.11	0.0401	0.3989	Nr1d2	nuclear receptor subfamily 1, group D, member 2	Multiple_Complex
TC1500002191.mm.1	11.54	11.69	-1.11	0.0401	0.3989	Prkag1	protein kinase, AMP-activated, gamma 1 non-catalytic subunit	Coding
TC0X00002453.mm.1	9.17	9.31	-1.11	0.0403	0.3992	G6pdx	glucose-6-phosphate dehydrogenase X-linked	Multiple_Complex
TC1600001588.mm.1	3.75	3.9	-1.11	0.0406	0.3998	Fbxo40	F-box protein 40	Multiple_Complex
TC1000002445.mm.1	8.9	9.05	-1.11	0.0435	0.4043	Trappc10	trafficking protein particle complex 10; Synthetic construct Mus musculus clone IMAGE:100062753, MGC:190949 trafficking protein particle complex 10 (Trappc10) mRNA, encodes complete protein.	Coding
TC1300002768.mm.1	8.25	8.4	-1.11	0.0443	0.4043	Zfp934	zinc finger protein 934	Multiple_Complex
TC0400003549.mm.1	11.64	11.79	-1.11	0.0445	0.4043	Ncdn	neurochondrin	Multiple_Complex
TC0900000208.mm.1	9.72	9.87	-1.11	0.0462	0.4076	Plppr2	phospholipid phosphatase related 2	Coding
TC1100001123.mm.1	6.95	7.1	-1.11	0.0467	0.4083	Coro6	coronin 6	Coding
TC0700004353.mm.1	13.2	13.35	-1.11	0.0472	0.4092	Armcx3	armadillo repeat containing, X-linked 3	Coding
TC1300002116.mm.1	11.81	11.95	-1.11	0.0473	0.4093	Agtpbp1; A230056J06Rik	ATP/GTP binding protein 1; RIKEN cDNA A230056J06 gene; RIKEN cDNA A230056J06 gene (A230056J06Rik), non-coding RNA.; ATP/GTP binding protein 1 (Agtpbp1), transcript variant 1, mRNA.; ATP/GTP binding protein 1 (Agtpbp1), transcript variant 2, mRNA.	Multiple_Complex
TC1200000142.mm.1	10.27	10.41	-1.11	0.0475	0.4097	Odc1	ornithine decarboxylase, structural 1	Coding
TC0200001747.mm.1	8.84	8.99	-1.11	0.0481	0.411	Disp2	dispatched homolog 2 (Drosophila)	Multiple_Complex
TC0300001399.mm.1	9.77	9.92	-1.11	0.0483	0.411	Dnajb14	DnaJ (Hsp40) homolog, subfamily B, member 14	Multiple_Complex
TC0700003710.mm.1	10.1	10.25	-1.11	0.0483	0.411	Tmem135	transmembrane protein 135	Multiple_Complex
TC1500001560.mm.1	11.84	11.99	-1.11	0.0497	0.4128	Derl1	Der1-like domain family, member 1	Coding
TC0X00002995.mm.1	6.4	6.55	-1.1	0.0262	0.3711	Gla	galactosidase, alpha	Coding
TC1300000192.mm.1	6.42	6.56	-1.1	0.0343	0.3875	Hist1h2bj	histone cluster 1, H2bj	Coding
TC1100004173.mm.1	7.8	7.95	-1.1	0.0412	0.4012	Cbx4	chromobox 4	Multiple_Complex
TC1800000396.mm.1	10.78	10.92	-1.1	0.0413	0.4012	Rnf14	ring finger protein 14	Coding
TC1100002682.mm.1	5.84	5.98	-1.1	0.0413	0.4012	Zfp454	zinc finger protein 454	Multiple_Complex
TC0200001773.mm.1	9.42	9.55	-1.1	0.0415	0.4017	Chp1	calcineurin-like EF hand protein 1	Multiple_Complex
TC0700004617.mm.1	6.07	6.21	-1.1	0.0435	0.4043	Adck4	aarF domain containing kinase 4	Multiple_Complex
TC1100004278.mm.1	9.07	9.22	-1.1	0.0436	0.4043	Vps25	vacuolar protein sorting 25 (yeast)	Multiple_Complex
TC0300000881.mm.1	6.48	6.62	-1.1	0.048	0.411	Rfx5	regulatory factor X, 5 (influences HLA class II expression)	Multiple_Complex
TC0X00001382.mm.1	10.3	10.43	-1.1	0.0491	0.4113	Prps1	phosphoribosyl pyrophosphate synthetase 1	Multiple_Complex
TC0100003301.mm.1	5.65	5.78	-1.09	0.0349	0.3877	Mr1	major histocompatibility complex, class I-related	Coding
TC0800000923.mm.1	6.79	6.91	-1.09	0.0356	0.3894	Clgn	calmegin	Multiple_Complex
TC1800001460.mm.1	11.11	11.23	-1.09	0.0386	0.396	Amd-ps3	S-adenosylmethionine decarboxylase, pseudogene 3 [Source:MGI Symbol;Acc:MGI:3704487]	Multiple_Complex
TC0200001072.mm.1	8.26	8.39	-1.09	0.0432	0.4043	Scrn3	secernin 3	Multiple_Complex
TC0600001579.mm.1	6.86	6.97	-1.09	0.0453	0.4055	Etv6	ets variant 6; ets variant gene 6 (TEL oncogene)	Multiple_Complex
TC1600000264.mm.1	6.71	6.82	-1.08	0.0385	0.396	B3gnt5	UDP-GlcNAc:betaGal beta-1,3-N-acetylglucosaminyltransferase 5	Multiple_Complex
TC0300002094.mm.1	10.17	10.28	-1.08	0.0453	0.4055	Ssr3	signal sequence receptor, gamma	Multiple_Complex
TC0400001856.mm.1	8.1	8.22	-1.08	0.0468	0.4083	Dhrs3	dehydrogenase/reductase (SDR family) member 3	Multiple_Complex
TC0X00000343.mm.1	4.64	4.54	1.07	0.048	0.4108	Rhox2b; Rhox3b-ps	reproductive homeobox 2B; reproductive homeobox 3B, pseudogene	Multiple_Complex
TC0X00000614.mm.1	4.06	3.93	1.09	0.0322	0.3838	Fmr1nb	fragile X mental retardation 1 neighbor	Coding
TC0200003643.mm.1	5.32	5.2	1.09	0.0369	0.3932	Fign	fidgetin; fidgetin (Fign), transcript variant 2, mRNA.	Multiple_Complex
TC1200002236.mm.1	7.21	7.09	1.09	0.0381	0.3948	Gpr68	G protein-coupled receptor 68	Multiple_Complex
TC1200002540.mm.1	4.13	4.01	1.09	0.0397	0.3983	Ighg1	immunoglobulin heavy constant gamma 1 (G1m marker)	Coding
TC0200000352.mm.1	5.3	5.18	1.09	0.0431	0.4043	Apbb1ip	amyloid beta (A4) precursor protein-binding, family B, member 1 interacting protein	Multiple_Complex
TC0700002771.mm.1	15.03	14.91	1.09	0.0446	0.4047	Cox6b1	cytochrome c oxidase, subunit VIb polypeptide 1	Multiple_Complex
TC1800000829.mm.1	4.64	4.51	1.09	0.0462	0.4076	Loxhd1	lipoxygenase homology domains 1	Coding
TC0500000084.mm.1	7.24	7.1	1.1	0.0309	0.3813	Sema3a	sema domain, immunoglobulin domain (Ig), short basic domain, secreted, (semaphorin) 3A	Multiple_Complex
TC0200004930.mm.1	7.23	7.09	1.1	0.0393	0.3971	Nol4l	nucleolar protein 4-like	Multiple_Complex
TC0700002758.mm.1	5.41	5.27	1.1	0.04	0.3988	Hcst	hematopoietic cell signal transducer	Coding
TC1100001911.mm.1	5	4.85	1.1	0.0414	0.4014	Smim5	small integral membrane protein 5	Multiple_Complex
TC0400001495.mm.1	7.06	6.93	1.1	0.0433	0.4043	Csmd2	CUB and Sushi multiple domains 2; SubName: Full=MKIAA1884 protein; SubName: Full=Uncharacterized protein; Flags: Fragment;	Multiple_Complex
TC1200000253.mm.1	5.38	5.24	1.1	0.0435	0.4043	Pxdn	peroxidasin homolog (Drosophila)	Multiple_Complex
TC0400003422.mm.1	7.89	7.75	1.1	0.045	0.4053	Ppih	peptidyl prolyl isomerase H	Coding
TC0X00003276.mm.1	3.88	3.74	1.1	0.0453	0.4055	Ppef1	protein phosphatase with EF hand calcium-binding domain 1	Coding
TC0800000188.mm.1	16.26	16.12	1.1	0.047	0.4084	Rpl19-ps11	ribosomal protein L19, pseudogene 11	Multiple_Complex
TC0200005287.mm.1	4.13	3.99	1.1	0.0481	0.411	Ctcfl	CCCTC-binding factor (zinc finger protein)-like	Coding
TC0200001297.mm.1	4.35	4.2	1.11	0.0279	0.3747	Olfr1129	olfactory receptor 1129	Coding
TC0200002511.mm.1	3.66	3.51	1.11	0.028	0.3747	Svs6	seminal vesicle secretory protein 6	Coding
TC1700001381.mm.1	10.38	10.23	1.11	0.0334	0.387	Dynlt1a	dynein light chain Tctex-type 1A; dynein light chain Tctex-type 1A (Dynlt1a), mRNA.	Multiple_Complex
TC1600001755.mm.1	3.65	3.5	1.11	0.0369	0.3932	Tmem45a2	transmembrane protein 45A2	Coding
TC0X00003349.mm.1	4.05	3.9	1.11	0.0371	0.3932	Egfl6	EGF-like-domain, multiple 6	Coding
TC0600001647.mm.1	4.28	4.13	1.11	0.0384	0.3959	Pik3c2g	phosphatidylinositol 3-kinase, C2 domain containing, gamma polypeptide	Coding
TC1700000531.mm.1	4.2	4.05	1.11	0.0429	0.4043	Ubash3a	ubiquitin associated and SH3 domain containing, A; Synthetic construct Mus musculus clone IMAGE:100015661, MGC:183394 ubiquitin associated and SH3 domain containing, A (Ubash3a) mRNA, encodes complete protein.	Multiple_Complex
TC1100004295.mm.1	7.96	7.81	1.11	0.0431	0.4043	Nme2	NME/NM23 nucleoside diphosphate kinase 2	Coding
TC0500001239.mm.1	4.61	4.47	1.11	0.0431	0.4043	Oasl2	2-5 oligoadenylate synthetase-like 2; 2'-5' oligoadenylate synthetase-like 2	Multiple_Complex
TC1000003183.mm.1	4.06	3.9	1.11	0.0433	0.4043	Olfr796	olfactory receptor 796	Coding
TC1900000565.mm.1	3.97	3.82	1.11	0.0436	0.4043	Cyp2c29; Cyp2c53-ps	cytochrome P450, family 2, subfamily c, polypeptide 29; cytochrome P450, family 2, subfamily c, polypeptide 53-ps	Multiple_Complex
TC0900003250.mm.1	5.46	5.3	1.11	0.0452	0.4055	Csrnp1	cysteine-serine-rich nuclear protein 1	Multiple_Complex
TC1300002147.mm.1	4.74	4.59	1.11	0.0453	0.4055	Ctsr	cathepsin R	Coding
TC0500001629.mm.1	4.41	4.26	1.11	0.0454	0.4055	Tfr2	transferrin receptor 2; transferrin receptor 2 (Tfr2), mRNA.	Coding
TC0900001864.mm.1	6.44	6.3	1.11	0.0476	0.4098	S1pr5	sphingosine-1-phosphate receptor 5	Coding
TC0600002920.mm.1	4.08	3.93	1.11	0.0481	0.411	Cidec	cell death-inducing DFFA-like effector c	Coding
TC0X00003384.mm.1	4.11	3.96	1.11	0.0482	0.411	Ssxb9	synovial sarcoma, X member B, breakpoint 9	Coding
TC1100001111.mm.1	4.51	4.36	1.11	0.0489	0.4113	Slc6a4	solute carrier family 6 (neurotransmitter transporter, serotonin), member 4	Multiple_Complex
TC1100001036.mm.1	3.66	3.5	1.12	0.0182	0.3463	Olfr402	olfactory receptor 402	Coding
TC0X00001113.mm.1	3.99	3.83	1.12	0.0217	0.3574	Cylc1	cylicin, basic protein of sperm head cytoskeleton 1	Coding
TC0600001621.mm.1	11.73	11.56	1.12	0.0225	0.3603	Rpl36a-ps3	ribosomal protein L36A, pseudogene 3	Multiple_Complex
TC0700004132.mm.1	7.77	7.6	1.12	0.0229	0.3614	Rras2	related RAS viral (r-ras) oncogene homolog 2	Coding
TC0700001474.mm.1	3.71	3.55	1.12	0.0239	0.3639	Olfr582	olfactory receptor 582	Coding
TC0900000461.mm.1	5.21	5.04	1.12	0.0266	0.3725	Bsx	brain specific homeobox	Coding
TC0600001189.mm.1	11.33	11.16	1.12	0.0294	0.3776	Lrrn1	leucine rich repeat protein 1, neuronal	Multiple_Complex
TC1900001053.mm.1	4.08	3.92	1.12	0.0297	0.3786	Slc22a19	solute carrier family 22 (organic anion transporter), member 19	Multiple_Complex
TC0X00002600.mm.1	4.91	4.75	1.12	0.03	0.3791	Pet2	plasmacytoma expressed transcript 2	Coding
TC0800000294.mm.1	4.1	3.93	1.12	0.0312	0.3825	Nkx6-3	NK6 homeobox 3	Coding
TC1400002822.mm.1	4.51	4.34	1.12	0.0317	0.3835	Trav3n-3; Trav3d-3	T cell receptor alpha variable 3N-3; T cell receptor alpha variable 3D-3	Coding
TC1400001545.mm.1	3.94	3.77	1.12	0.0318	0.3838	Myoz1	myozenin 1	Coding
TC1000001897.mm.1	4.6	4.44	1.12	0.034	0.3874	Arg1	arginase, liver	Coding
TC1700000923.mm.1	4.17	4	1.12	0.0362	0.3916	Pgc	progastricsin (pepsinogen C)	Coding
TC0100000885.mm.1	4.32	4.16	1.12	0.0372	0.3932	Rbm44	RNA binding motif protein 44	Coding
TC1100000264.mm.1	6.17	6	1.12	0.0376	0.3932	Fancl	Fanconi anemia, complementation group L	Multiple_Complex
TC1000001577.mm.1	4.06	3.89	1.12	0.0382	0.3948	Sdr9c7	4short chain dehydrogenase/reductase family 9C, member 7	Multiple_Complex
TC1100003260.mm.1	4.54	4.38	1.12	0.0394	0.3975	Efcab5	EF-hand calcium binding domain 5	Multiple_Complex
TC0100000383.mm.1	3.8	3.64	1.12	0.0396	0.3982	Mstn	myostatin	Coding
TC1200001279.mm.1	5.14	4.98	1.12	0.0405	0.3994	Tex22	testis expressed gene 22	Coding
TC1100002729.mm.1	11.05	10.89	1.12	0.0422	0.4035	Uqcrq	ubiquinol-cytochrome c reductase, complex III subunit VII	Multiple_Complex
TC0400002769.mm.1	4.25	4.08	1.12	0.043	0.4043	Mup2; Mup13; Mup18; Mup16; Mup14; Mup15; Mup17; Mup1	major urinary protein 2 (Mup2), transcript variant 2, mRNA.; major urinary protein 13; major urinary protein 18; major urinary protein 16; major urinary protein 14; major urinary protein 15 (Mup15), mRNA.; major urinary protein 17; major urinary protein 2; major urinary protein 2 (Mup2), transcript variant 1, mRNA.; major urinary protein 15; major urinary protein 1, mRNA (cDNA clone MGC:18536 IMA…	Multiple_Complex
TC1300000514.mm.1	8.91	8.74	1.12	0.044	0.4043	Jarid2	jumonji, AT rich interactive domain 2	Multiple_Complex
TC0600002280.mm.1	4.19	4.02	1.12	0.0442	0.4043	Hoxa6	homeobox A6	Coding
TC0200000927.mm.1	4.51	4.34	1.12	0.0442	0.4043	Tbr1	T-box brain gene 1	Multiple_Complex
TC0700001151.mm.1	4.94	4.77	1.12	0.0444	0.4043	Prc1	protein regulator of cytokinesis 1; protein regulator of cytokinesis 1 (Prc1), mRNA.	Multiple_Complex
TC1400000614.mm.1	3.17	3.01	1.12	0.048	0.4108	Olfr1509	olfactory receptor 1509	Coding
TC0400003218.mm.1	7.1	6.95	1.12	0.0499	0.4134	Lrrc42	leucine rich repeat containing 42	Multiple_Complex
TC1700001794.mm.1	5.77	5.59	1.13	0.015	0.3328	Mdga1	MAM domain containing glycosylphosphatidylinositol anchor 1; Synthetic construct Mus musculus clone IMAGE:100069491, MGC:199393 MAM domain containing glycosylphosphatidylinositol anchor 1 (Mdga1) mRNA, encodes complete protein.	Multiple_Complex
TC0400000543.mm.1	4.51	4.34	1.13	0.0181	0.3455	Plppr1	phospholipid phosphatase related 1	Multiple_Complex
TC1300001430.mm.1	5.65	5.47	1.13	0.0216	0.3571	Chrm3	cholinergic receptor, muscarinic 3, cardiac	Multiple_Complex
TC1600000726.mm.1	8.97	8.8	1.13	0.0243	0.3655	Cblb	Casitas B-lineage lymphoma b	Coding
TC0300001368.mm.1	4.08	3.9	1.13	0.0257	0.37	Slc9b1	solute carrier family 9, subfamily B (NHA1, cation proton antiporter 1), member 1	Multiple_Complex
TC0400002770.mm.1	4.13	3.95	1.13	0.0279	0.3747	Mup19; Mup1	major urinary protein 19; major urinary protein 1, mRNA (cDNA clone MGC:18536 IMAGE:4195753), complete cds.; major urinary protein 1, mRNA (cDNA clone MGC:18537 IMAGE:4195401), complete cds.; major urinary protein 1, mRNA (cDNA clone MGC:117823 IMAGE:5098340), complete cds.	Coding
TC0400000688.mm.1	4.11	3.94	1.13	0.028	0.3747	Mup-ps16	major urinary protein, pseudogene 16	Multiple_Complex
TC0900001095.mm.1	14.36	14.18	1.13	0.0282	0.3747	Rps27a-ps2	ribosomal protein S27A, pseudogene 2 [Source:MGI Symbol;Acc:MGI:3643614]	Multiple_Complex
TC1600000192.mm.1	5.31	5.14	1.13	0.0289	0.3765	Cebpd	CCAAT/enhancer binding protein (C/EBP), delta	Multiple_Complex
TC1700002060.mm.1	3.72	3.54	1.13	0.0292	0.3771	Olfr97	olfactory receptor 97	Coding
TC0600000671.mm.1	4.28	4.11	1.13	0.0306	0.3802	Ccdc129	coiled-coil domain containing 129	Multiple_Complex
TC0300000172.mm.1	10.07	9.89	1.13	0.0323	0.3841	Tnik	TRAF2 and NCK interacting kinase	Multiple_Complex
TC1800000448.mm.1	4.44	4.26	1.13	0.0337	0.3871	Spink5	serine peptidase inhibitor, Kazal type 5	Coding
TC1600000432.mm.1	4.15	3.97	1.13	0.0347	0.3875	Bex6	brain expressed gene 6	Coding
TC0900000539.mm.1	3.66	3.48	1.13	0.0359	0.3907	Tmprss13	transmembrane protease, serine 13	Coding
TC1600002183.mm.1	10.79	10.62	1.13	0.0371	0.3932	Atp5o	ATP synthase, H+ transporting, mitochondrial F1 complex, O subunit	Multiple_Complex
TC1600002020.mm.1	3.69	3.51	1.13	0.0372	0.3932	Krtap19-5	keratin associated protein 19-5	Coding
TC0X00000516.mm.1	6.45	6.27	1.13	0.0392	0.3965	Smim10l2a	small integral membrane protein 10 like 2A	Multiple_Complex
TC1300001548.mm.1	3.65	3.47	1.13	0.0397	0.3983	Olfr1366	olfactory receptor 1366	Coding
TC0X00003185.mm.1	4.64	4.46	1.13	0.0397	0.3983	Ribc1	RIB43A domain with coiled-coils 1	Multiple_Complex
TC0400003050.mm.1	3.62	3.45	1.13	0.0417	0.4017	Izumo3	IZUMO family member 3	Coding
TC0300001142.mm.1	4.47	4.3	1.13	0.0432	0.4043	Psrc1	proline/serine-rich coiled-coil 1	Multiple_Complex
TC1100002515.mm.1	7.36	7.18	1.13	0.0435	0.4043	Tenm2	teneurin transmembrane protein 2	Multiple_Complex
TC1500001450.mm.1	7.81	7.63	1.13	0.0444	0.4043	Angpt1	angiopoietin 1; angiopoietin 1 (Angpt1), mRNA.	Coding
TC0100002656.mm.1	8.1	7.93	1.13	0.0446	0.4046	Dock10	dedicator of cytokinesis 10; dedicator of cytokinesis 10 (Dock10), mRNA.	Multiple_Complex
TC1600000493.mm.1	5.42	5.25	1.13	0.0451	0.4055	Sema5b	sema domain, seven thrombospondin repeats (type 1 and type 1-like), transmembrane domain (TM) and short cytoplasmic domain, (semaphorin) 5B	Multiple_Complex
TC0500002484.mm.1	9.05	8.88	1.13	0.0465	0.4078	Rpl9	ribosomal protein L9	Multiple_Complex
TC1900001703.mm.1	4.26	4.08	1.13	0.0475	0.4096	Nrap	nebulin-related anchoring protein; nebulin-related anchoring protein (Nrap), transcript variant 1, mRNA.	Coding
TC0700001698.mm.1	4.1	3.92	1.13	0.0478	0.4104	Tmc5	transmembrane channel-like gene family 5	Coding
TC0400001188.mm.1	5.55	5.37	1.13	0.0479	0.4106	Bend5	BEN domain containing 5	Multiple_Complex
TC0400003402.mm.1	3.81	3.63	1.13	0.049	0.4113	Olfr1337	olfactory receptor 1337	Coding
TC0400004208.mm.1	4.34	4.15	1.14	0.0132	0.3242	Mup7; Mup1	major urinary protein 7; major urinary protein 1	Coding
TC1500001570.mm.1	6.45	6.26	1.14	0.0155	0.3329	Fbxo32	F-box protein 32	Multiple_Complex
TC0100002073.mm.1	6.17	5.98	1.14	0.0188	0.3478	Col19a1	collagen, type XIX, alpha 1	Multiple_Complex
TC0800000366.mm.1	6.62	6.43	1.14	0.0196	0.3501	Dusp26	dual specificity phosphatase 26 (putative)	Multiple_Complex
TC0100000622.mm.1	4.75	4.56	1.14	0.0222	0.3594	Cxcr2	chemokine (C-X-C motif) receptor 2	Coding
TC1100001631.mm.1	3.42	3.23	1.14	0.023	0.3614	Hspb9	heat shock protein, alpha-crystallin-related, B9	Coding
TC0900000047.mm.1	3.99	3.81	1.14	0.0232	0.3618	Mmp3	matrix metallopeptidase 3	Coding
TC0400000118.mm.1	9.06	8.87	1.14	0.0237	0.3633	Runx1t1	runt-related transcription factor 1; translocated to, 1 (cyclin D-related)	Multiple_Complex
TC0600001527.mm.1	4.25	4.06	1.14	0.0262	0.3711	Klrb1f	killer cell lectin-like receptor subfamily B member 1F	Multiple_Complex
TC0800001316.mm.1	7.7	7.51	1.14	0.027	0.373	Cmtr2	cap methyltransferase 2	Coding
TC1700001388.mm.1	9.9	9.71	1.14	0.0298	0.3787	Dynlt1f; Dynlt1c	dynein light chain Tctex-type 1F; dynein light chain Tctex-type 1C (Dynlt1c), mRNA.	Multiple_Complex
TC0400004226.mm.1	4.3	4.11	1.14	0.0299	0.379	Cela2a	chymotrypsin-like elastase family, member 2A	Multiple_Complex
TC1500001572.mm.1	4.48	4.29	1.14	0.0307	0.3808	Anxa13	annexin A13	Coding
TC1400000413.mm.1	4.27	4.08	1.14	0.0308	0.381	Mbl1	mannose-binding lectin (protein A) 1	Coding
TC0600002296.mm.1	6.99	6.8	1.14	0.0321	0.3838	Jazf1	JAZF zinc finger 1	Multiple_Complex
TC0400000234.mm.1	8.99	8.8	1.14	0.0335	0.3871	Epha7	Eph receptor A7	Multiple_Complex
TC1100004291.mm.1	8.53	8.35	1.14	0.0335	0.3871	Psme2b	protease (prosome, macropain) activator subunit 2B	Multiple_Complex
TC0600000600.mm.1	4.24	4.05	1.14	0.0335	0.3871			Coding
TC0800001797.mm.1	5.23	5.03	1.14	0.0352	0.3881	Angpt2	angiopoietin 2	Multiple_Complex
TC0500000778.mm.1	11.64	11.45	1.14	0.0355	0.3894	Hmgn2-ps1	high mobility group nucleosomal binding domain 2, pseudogene 1	Multiple_Complex
TC0100003814.mm.1	4.04	3.85	1.14	0.0373	0.3932	Dtl	denticleless homolog (Drosophila)	Multiple_Complex
TC0700003647.mm.1	6.78	6.6	1.14	0.0375	0.3932	Mesdc1	mesoderm development candidate 1	Coding
TC1400001546.mm.1	5.15	4.96	1.14	0.0375	0.3932	Synpo2l	synaptopodin 2-like	Coding
TC0100003671.mm.1	9.92	9.73	1.14	0.0381	0.3948	H3f3a	H3 histone, family 3A	Multiple_Complex
TC1900000838.mm.1	4.06	3.87	1.14	0.039	0.396	Pnlip	pancreatic lipase	Coding
TC0700004519.mm.1	4.6	4.41	1.14	0.0408	0.4001	Sigirr	single immunoglobulin and toll-interleukin 1 receptor (TIR) domain	Coding
TC0200004034.mm.1	3.82	3.63	1.14	0.0409	0.4004	Olfr1214	olfactory receptor 1214	Coding
TC0700002160.mm.1	5.22	5.03	1.14	0.0411	0.401	Tnnt1	troponin T1, skeletal, slow	Multiple_Complex
TC0200001513.mm.1	3.77	3.58	1.14	0.0419	0.4025	Rag2	recombination activating gene 2	Coding
TC0900001665.mm.1	5.36	5.17	1.14	0.0428	0.4043	Limd1	LIM domains containing 1	Coding
TC1000000203.mm.1	5.67	5.48	1.14	0.0431	0.4043	Taar7e	trace amine-associated receptor 7E	Coding
TC0600003109.mm.1	3.7	3.51	1.14	0.0445	0.4043	C1s2	complement component 1, s subcomponent 2	Coding
TC0600001534.mm.1	4.4	4.21	1.14	0.045	0.4052	Tmem52b	transmembrane protein 52B	Coding
TC1400000698.mm.1	3.82	3.63	1.14	0.0454	0.4055	Trav10	T cell receptor alpha variable 10	Multiple_Complex
TC0500001257.mm.1	6.45	6.27	1.14	0.0463	0.4076	Triap1	TP53 regulated inhibitor of apoptosis 1	Coding
TC1500001534.mm.1	4.18	3.99	1.14	0.0482	0.411	Dscc1	defective in sister chromatid cohesion 1 homolog (S. cerevisiae)	Multiple_Complex
TC0300000129.mm.1	4.79	4.6	1.14	0.0492	0.4113	Dnajc5b	DnaJ (Hsp40) homolog, subfamily C, member 5 beta	Coding
TC0600003559.mm.1	3.51	3.32	1.14	0.0495	0.412	Igkv4-71	immunoglobulin kappa chain variable 4-71	Coding
TC0500001379.mm.1	4.2	4.01	1.14	0.0495	0.412	Myl2	myosin, light polypeptide 2, regulatory, cardiac, slow	Multiple_Complex
TC0700000240.mm.1	7.51	7.32	1.14	0.0497	0.4128	Dact3	dapper homolog 3, antagonist of beta-catenin (xenopus)	Coding
TC1800001431.mm.1	11.38	11.18	1.15	0.0094	0.3011	Ablim3	actin binding LIM protein family, member 3	Coding
TC0500000848.mm.1	4.36	4.16	1.15	0.0115	0.3129	Cxcl1	chemokine (C-X-C motif) ligand 1	Coding
TC0700004048.mm.1	6.29	6.09	1.15	0.0141	0.3276	Olfr484	olfactory receptor 484	Coding
TC0100002817.mm.1	4.11	3.91	1.15	0.0151	0.3329	Otos	otospiralin	Multiple_Complex
TC0200002172.mm.1	3.32	3.12	1.15	0.0176	0.3431	Insm1	insulinoma-associated 1	Coding
TC1400002683.mm.1	11.61	11.4	1.15	0.0177	0.3433	Slitrk1	SLIT and NTRK-like family, member 1	Coding
TC1400001969.mm.1	3.92	3.72	1.15	0.0185	0.3474	Olfr722	olfactory receptor 722	Coding
TC0X00000990.mm.1	9.74	9.54	1.15	0.0188	0.3478	Pin4	protein (peptidyl-prolyl cis/trans isomerase) NIMA-interacting, 4 (parvulin)	Multiple_Complex
TC0500001307.mm.1	6.42	6.21	1.15	0.0197	0.3501	Hrk	harakiri, BCL2 interacting protein (contains only BH3 domain); Synthetic construct Homo sapiens clone IMAGE:9095693; MGC:199467 harakiri, BCL2 interacting protein (contains only BH3 domain) (Hrk) gene, encodes complete protein.	Multiple_Complex
TC1800001043.mm.1	4.95	4.75	1.15	0.0201	0.3521	Dsc2	desmocollin 2	Coding
TC1500001285.mm.1	5.13	4.93	1.15	0.0211	0.3558	Fbxl7	F-box and leucine-rich repeat protein 7	Multiple_Complex
TC1800000638.mm.1	4.22	4.02	1.15	0.023	0.3614	Sh3tc2	SH3 domain and tetratricopeptide repeats 2; Synthetic construct Mus musculus clone IMAGE:100063631, MGC:191100 SH3 domain and tetratricopeptide repeats 2 (Sh3tc2) mRNA, encodes complete protein.	Coding
TC1300002463.mm.1	5.99	5.79	1.15	0.0236	0.363	Iqgap2	IQ motif containing GTPase activating protein 2	Multiple_Complex
TC0900001595.mm.1	9.53	9.33	1.15	0.0238	0.3638	Rpsa	ribosomal protein SA	Coding
TC1700001439.mm.1	7.46	7.26	1.15	0.0239	0.3639	Pacrg	PARK2 co-regulated	Multiple_Complex
TC0600000270.mm.1	4.14	3.94	1.15	0.024	0.3648	Cpa4	carboxypeptidase A4	Coding
TC1900001621.mm.1	15.81	15.6	1.15	0.0241	0.3653	Usmg5	upregulated during skeletal muscle growth 5	Multiple_Complex
TC1100003288.mm.1	12.08	11.89	1.15	0.0248	0.3664	Rpl23a; Snord42b	ribosomal protein L23A; small nucleolar RNA, C/D box 42B	Multiple_Complex
TC0500002915.mm.1	5.12	4.92	1.15	0.0251	0.3673	Hfm1	HFM1, ATP-dependent DNA helicase homolog (S. cerevisiae)	Multiple_Complex
TC1300002153.mm.1	5.13	4.93	1.15	0.027	0.373	Cts3	cathepsin 3	Coding
TC1500001963.mm.1	4	3.8	1.15	0.0271	0.3731	Nfam1	Nfat activating molecule with ITAM motif 1; Nfat activating molecule with ITAM motif 1 (Nfam1), mRNA.	Coding
TC0100003404.mm.1	4.29	4.08	1.15	0.0277	0.374	Fmo6	flavin containing monooxygenase 6	Coding
TC1800000490.mm.1	4.53	4.33	1.15	0.028	0.3747	Arl14epl	ADP-ribosylation factor-like 14 effector protein-like	Coding
TC0300001494.mm.1	3.79	3.59	1.15	0.028	0.3747	Uox	urate oxidase	Multiple_Complex
TC0300002453.mm.1	6.32	6.11	1.15	0.0285	0.3756	Cgn	cingulin	Multiple_Complex
TC0500002944.mm.1	7.7	7.5	1.15	0.0304	0.3796	Atp5k	ATP synthase, H+ transporting, mitochondrial F1F0 complex, subunit E; ATP synthase, H+ transporting, mitochondrial F1F0 complex, subunit e	Multiple_Complex
TC1000003151.mm.1	8.24	8.04	1.15	0.0324	0.3841	Rpl41	ribosomal protein L41	Multiple_Complex
TC1900000630.mm.1	4.86	4.66	1.15	0.0329	0.3862	Nkx2-3	NK2 homeobox 3	Coding
TC1700000372.mm.1	3.47	3.26	1.15	0.0332	0.3865	Prss28	protease, serine 28; protease, serine, 28; protease, serine, 28 (Prss28), mRNA.	Coding
TC0X00000924.mm.1	4.12	3.91	1.15	0.0336	0.3871	Pgr15l	G protein-coupled receptor 15-like; Synthetic construct Mus musculus clone IMAGE:100064102, MGC:193473 G protein-coupled receptor 15-like (Pgr15l) mRNA, encodes complete protein.	Coding
TC0500000985.mm.1	8.35	8.15	1.15	0.0339	0.3871	Mrps18c	mitochondrial ribosomal protein S18C	Multiple_Complex
TC0800002905.mm.1	5.2	5	1.15	0.0351	0.3881	Hp	haptoglobin	Coding
TC0800001396.mm.1	4.03	3.84	1.15	0.0364	0.3918	Bco1	beta-carotene oxygenase 1	Coding
TC1400000748.mm.1	6.21	6.01	1.15	0.0366	0.3926	Rem2	rad and gem related GTP binding protein 2	Multiple_Complex
TC0100002967.mm.1	5.15	4.95	1.15	0.039	0.396	Marco	macrophage receptor with collagenous structure	Coding
TC0200004007.mm.1	4.41	4.22	1.15	0.0407	0.4	Olfr1164	olfactory receptor 1164	Coding
TC1600001781.mm.1	4.2	4.01	1.15	0.0407	0.4	Olfr175-ps1	olfactory receptor 175, pseudogene 1	Multiple_Complex
TC1100002000.mm.1	4.36	4.16	1.15	0.0417	0.4017	Card14	caspase recruitment domain family, member 14	Multiple_Complex
TC0800002918.mm.1	3.57	3.37	1.15	0.0445	0.4043	Chst4	carbohydrate (chondroitin 6/keratan) sulfotransferase 4	Coding
TC1900001142.mm.1	3.91	3.71	1.15	0.0453	0.4055	Oosp1	oocyte secreted protein 1	Coding
TC1300000338.mm.1	3.86	3.66	1.15	0.0455	0.4061	Irf4	interferon regulatory factor 4	Coding
TC0200002488.mm.1	4.38	4.18	1.15	0.0457	0.4068	R3hdml	R3H domain containing-like	Coding
TC0100000135.mm.1	5.15	4.95	1.15	0.0463	0.4076	Gsta3	glutathione S-transferase, alpha 3	Multiple_Complex
TC1600000666.mm.1	4.02	3.81	1.15	0.0477	0.4103	Cd200r3	CD200 receptor 3	Multiple_Complex
TC0Y00000011.mm.1	4.14	3.95	1.15	0.0485	0.4111	Rbmy; Gm10256; Gm10352; Gm21677; Gm21693; Gm21704; Gm21708; Gm4064	RNA binding motif protein, Y chromosome (Rbmy), transcript variant 2, mRNA.; predicted gene 10256; predicted gene 10352; predicted gene, 21677 (Gm21677), mRNA.; predicted gene, 21693 (Gm21693), mRNA.; predicted gene, 21704; predicted gene, 21708 (Gm21708), mRNA.; predicted gene 4064; RNA binding motif protein, Y chromosome (Rbmy), transcript variant 1, mRNA.; RNA binding motif protein, Y chromoso…	Coding
TC0500000112.mm.1	10.29	10.09	1.15	0.0491	0.4113	Cacna2d1	calcium channel, voltage-dependent, alpha2/delta subunit 1	Multiple_Complex
TC1300001519.mm.1	4.12	3.91	1.15	0.0495	0.412	Trgj2; Tcrg-C2; Trgv2	T cell receptor gamma joining 2; T-cell receptor gamma, constant 2; T cell receptor gamma variable 2	Multiple_Complex
TC0100000253.mm.1	13.87	13.65	1.16	0.0078	0.2875	Cox5b	cytochrome c oxidase subunit Vb	Coding
TC0800000679.mm.1	5.24	5.03	1.16	0.01	0.3044	2001-03-01	membrane-associated ring finger (C3HC4) 1	Multiple_Complex
TC0900003098.mm.1	5.46	5.24	1.16	0.012	0.3159	Camp	cathelicidin antimicrobial peptide	Coding
TC0Y00000242.mm.1	4.14	3.93	1.16	0.012	0.316	Rbmy; Gm4064	RNA binding motif protein, Y chromosome; PREDICTED: predicted gene 4064, transcript variant 2 (Gm4064), mRNA.; predicted gene 4064	Coding
TC0800002128.mm.1	4.45	4.23	1.16	0.0129	0.3226	Triml1	tripartite motif family-like 1	Coding
TC1400000689.mm.1	9.9	9.68	1.16	0.0154	0.3329	Trav13n-4	T cell receptor alpha variable 13N-4	Multiple_Complex
TC0X00000693.mm.1	6.57	6.35	1.16	0.0162	0.3366	Plxnb3	plexin B3	Multiple_Complex
TC0200004052.mm.1	3.84	3.62	1.16	0.0167	0.3386	Olfr1231	olfactory receptor 1231	Coding
TC1700000649.mm.1	5.19	4.98	1.16	0.0171	0.3406	Zbtb12	zinc finger and BTB domain containing 12	Coding
TC0200005127.mm.1	4.62	4.4	1.16	0.0173	0.3409	Wfdc3	WAP four-disulfide core domain 3	Multiple_Complex
TC0Y00000243.mm.1	4.15	3.94	1.16	0.0178	0.3433	Rbmy; Gm21677; Gm21693; Gm21704; Gm21708	RNA binding motif protein, Y chromosome (Rbmy), transcript variant 2, mRNA.; predicted gene, 21677 (Gm21677), mRNA.; predicted gene, 21693 (Gm21693), mRNA.; predicted gene, 21704 (Gm21704), mRNA.; predicted gene, 21708 (Gm21708), mRNA.; RNA binding motif protein, Y chromosome (Rbmy), transcript variant 1, mRNA.; predicted gene, 21677; RNA binding motif protein, Y chromosome; predicted gene, 21708	Coding
TC1900000962.mm.1	4.03	3.82	1.16	0.0185	0.3474	Tsga10ip	testis specific 10 interacting protein	Coding
TC1100000984.mm.1	8.34	8.12	1.16	0.0187	0.3478	Txndc17	thioredoxin domain containing 17	Multiple_Complex
TC0400001259.mm.1	8.57	8.35	1.16	0.0213	0.3563	Prdx1	peroxiredoxin 1	Multiple_Complex
TC0300000334.mm.1	7.91	7.69	1.16	0.0223	0.3598	Pcdh10	protocadherin 10	Multiple_Complex
TC0700002538.mm.1	4.33	4.12	1.16	0.0235	0.363	Vmn1r126; Gm4214; Gm4175	vomeronasal 1 receptor 126; predicted gene 4214 (Gm4214), mRNA.; predicted gene 4175 (Gm4175), mRNA.	Coding
TC1400002108.mm.1	4	3.78	1.16	0.0239	0.3639	Cma1	chymase 1, mast cell	Coding
TC1100003147.mm.1	5	4.78	1.16	0.0246	0.3657	Spns3	spinster homolog 3	Multiple_Complex
TC1100001859.mm.1	4.67	4.46	1.16	0.0261	0.3711	Sstr2	somatostatin receptor 2; Synthetic construct Mus musculus clone IMAGE:100014956, MGC:180320 somatostatin receptor 2 (Sstr2) mRNA, encodes complete protein.; somatostatin receptor 2 (Sstr2), transcript variant 1, mRNA.	Coding
TC0700004039.mm.1	3.87	3.66	1.16	0.0271	0.373	Ovch2	ovochymase 2	Coding
TC0700003512.mm.1	4.8	4.59	1.16	0.0271	0.373	St8sia2	ST8 alpha-N-acetyl-neuraminide alpha-2,8-sialyltransferase 2	Coding
TC1200002288.mm.1	3.94	3.73	1.16	0.0272	0.3731	Serpina12	serine (or cysteine) peptidase inhibitor, clade A (alpha-1 antiproteinase, antitrypsin), member 12	Coding
TC0200001597.mm.1	7.77	7.55	1.16	0.0281	0.3747	Mpped2	metallophosphoesterase domain containing 2	Multiple_Complex
TC1200000256.mm.1	4.33	4.11	1.16	0.0288	0.3765	Fam150b	family with sequence similarity 150, member B	Coding
TC1300002547.mm.1	14.08	13.86	1.16	0.0293	0.3773	Hmgb1-ps9; Gm6115	high mobility group box 1, pseudogene 9 [Source:MGI Symbol;Acc:MGI:96115]; PREDICTED: predicted gene 6115 (Gm6115), mRNA.	Multiple_Complex
TC0800001199.mm.1	4.33	4.11	1.16	0.0301	0.3793	Ces2h	carboxylesterase 2H	Coding
TC1100001932.mm.1	6.34	6.12	1.16	0.0309	0.381	Ubald2; Gm7367	UBA-like domain containing 2; 1110014K08Rik pseudogene	Multiple_Complex
TC0100001646.mm.1	4.03	3.81	1.16	0.0319	0.3838	Mptx1	mucosal pentraxin 1	Coding
TC0700003607.mm.1	7.9	7.68	1.16	0.0324	0.3843	Rps17	ribosomal protein S17	Multiple_Complex
TC0700003853.mm.1	4.19	3.98	1.16	0.0325	0.3845	Chrna10	cholinergic receptor, nicotinic, alpha polypeptide 10	Coding
TC0300003133.mm.1	4.75	4.54	1.16	0.0335	0.3871	Ifi44	interferon-induced protein 44	Multiple_Complex
TC1300001596.mm.1	4.69	4.48	1.16	0.0336	0.3871	Vmn1r-ps110	vomeronasal 1 receptor, pseudogene 110	Multiple_Complex
TC0600002462.mm.1	4.44	4.22	1.16	0.0368	0.3932	Smyd1	SET and MYND domain containing 1	Multiple_Complex
TC0100001889.mm.1	9.69	9.47	1.16	0.0379	0.3942	Xkr4	X Kell blood group precursor related family member 4	Multiple_Complex
TC1500002054.mm.1	4.26	4.04	1.16	0.0385	0.396	Syce3	synaptonemal complex central element protein 3	Coding
TC0400000346.mm.1	3.68	3.47	1.16	0.0386	0.396	Tmem215	transmembrane protein 215	Coding
TC1700002050.mm.1	7.31	7.09	1.16	0.0387	0.396	Mog	myelin oligodendrocyte glycoprotein	Multiple_Complex
TC1100003779.mm.1	4.98	4.77	1.16	0.0389	0.396	Dhx58	DEXH (Asp-Glu-X-His) box polypeptide 58	Multiple_Complex
TC0100003350.mm.1	4.21	4	1.16	0.0403	0.3992	Tnn	tenascin N	Coding
TC1700001531.mm.1	3.8	3.59	1.16	0.0406	0.3998	Vmn2r104	vomeronasal 2, receptor 104	Coding
TC1400002824.mm.1	7.17	6.96	1.16	0.0416	0.4017	Trav4n-4	Trav4n-4 T cell receptor alpha variable 4N-4; T cell receptor alpha variable 4N-4	Multiple_Complex
TC1200002114.mm.1	5.2	4.99	1.16	0.0437	0.4043	Ngb	neuroglobin	Coding
TC0700000758.mm.1	4.49	4.27	1.16	0.0438	0.4043	Lim2; Gm38999	lens intrinsic membrane protein 2; predicted gene, 38999	Coding
TC0400001732.mm.1	4.79	4.58	1.16	0.0438	0.4043	Pla2g2c	phospholipase A2, group IIC	Coding
TC0900000419.mm.1	4.54	4.33	1.16	0.0468	0.4083	Olfr924	olfactory receptor 924	Coding
TC0300002141.mm.1	14.28	14.07	1.16	0.0471	0.4088	Rpl32-ps	ribosomal protein L32, pseudogene [Source:MGI Symbol;Acc:MGI:98039]	Multiple_Complex
TC0600002708.mm.1	4.06	3.85	1.16	0.0471	0.4089	Vmn1r-ps31	vomeronasal 1 receptor, pseudogene 31	Multiple_Complex
TC1800000165.mm.1	3.93	3.71	1.16	0.0483	0.411	Mep1b	meprin 1 beta	Coding
TC1200000878.mm.1	10.72	10.49	1.17	0.0092	0.3011	Slirp	SRA stem-loop interacting RNA binding protein	Coding
TC0200001158.mm.1	5.35	5.12	1.17	0.0108	0.309	Itga4	integrin alpha 4	Multiple_Complex
TC0600002142.mm.1	3.93	3.7	1.17	0.0114	0.3129	Clec5a	C-type lectin domain family 5, member a	Multiple_Complex
TC0100003049.mm.1	4.48	4.24	1.17	0.0115	0.3129	Il20	interleukin 20	Coding
TC1300000147.mm.1	5.44	5.21	1.17	0.0123	0.3177	Sfrp4	secreted frizzled-related protein 4	Coding
TC1200000471.mm.1	5.24	5.02	1.17	0.0138	0.3274	Aldoart2	aldolase 1 A, retrogene 2	Coding
TC1400002814.mm.1	3.94	3.71	1.17	0.0147	0.3307	Trav17	T cell receptor alpha variable 17	Multiple_Complex
TC0600000923.mm.1	5.81	5.58	1.17	0.015	0.3328	Rtkn	rhotekin	Multiple_Complex
TC0800002700.mm.1	4.35	4.13	1.17	0.018	0.3452	Ces1b	carboxylesterase 1B	Coding
TC1700002350.mm.1	3.5	3.28	1.17	0.0184	0.3466	Cd70	CD70 antigen	Coding
TC0200004336.mm.1	4.15	3.92	1.17	0.022	0.3585	Olfr1308	olfactory receptor 1308	Coding
TC0700001372.mm.1	8.92	8.69	1.17	0.0225	0.3603	Prkrir	protein-kinase, interferon-inducible double stranded RNA dependent inhibitor, repressor of (P58 repressor)	Multiple_Complex
TC0100000519.mm.1	11.23	11	1.17	0.0242	0.3653	Eef1b2	eukaryotic translation elongation factor 1 beta 2	Multiple_Complex
TC1700000777.mm.1	3.72	3.49	1.17	0.0242	0.3654	Olfr111	olfactory receptor 111	Coding
TC0500002142.mm.1	3.65	3.42	1.17	0.0243	0.3655	Mnx1	motor neuron and pancreas homeobox 1	Coding
TC1100000932.mm.1	4.52	4.29	1.17	0.0262	0.3713	Cldn7	claudin 7	Coding
TC1000002500.mm.1	7.98	7.75	1.17	0.0284	0.3752	Uqcr11	ubiquinol-cytochrome c reductase, complex III subunit XI	Multiple_Complex
TC1700001574.mm.1	3.9	3.68	1.17	0.0286	0.3759	Vmn2r111	vomeronasal 2, receptor 111	Coding
TC1400000292.mm.1	4.9	4.67	1.17	0.0293	0.3776	Lrtm1	leucine-rich repeats and transmembrane domains 1	Multiple_Complex
TC0900001045.mm.1	4	3.77	1.17	0.0306	0.3802	Gcm1	glial cells missing homolog 1 (Drosophila)	Coding
TC0200002393.mm.1	9.22	9	1.17	0.0319	0.3838	Rpl21-ps9	ribosomal protein L21, pseudogene 9	Multiple_Complex
TC0300000238.mm.1	6.06	5.84	1.17	0.0339	0.3871	Sox2ot; Mir1897	SOX2 overlapping transcript (non-protein coding); microRNA 1897	Multiple_Complex
TC0500001682.mm.1	4.59	4.36	1.17	0.0342	0.3875	Elfn1	leucine rich repeat and fibronectin type III, extracellular 1	Coding
TC0700002073.mm.1	5.99	5.76	1.17	0.0342	0.3875	Krtap5-4	keratin associated protein 5-4; Synthetic construct Mus musculus clone IMAGE:100015806, MGC:183445 keratin associated protein 5-4 (Krtap5-4) mRNA, encodes complete protein.	Coding
TC1700001605.mm.1	5.71	5.49	1.17	0.0344	0.3875	Flywch2	FLYWCH family member 2	Coding
TC1600000768.mm.1	3.66	3.44	1.17	0.035	0.388	Olfr195	olfactory receptor 195	Coding
TC0600001931.mm.1	13.24	13	1.17	0.0356	0.3894	Cadps2	Ca2+-dependent activator protein for secretion 2; Synthetic construct Mus musculus clone IMAGE:100069536, MGC:199438 Ca2+-dependent activator protein for secretion 2 (Cadps2) mRNA, encodes complete protein.	Multiple_Complex
TC0Y00000562.mm.1	4.18	3.95	1.17	0.0361	0.3911	Rbmy; Gm21677; Gm21708	RNA binding motif protein, Y chromosome; predicted gene, 21677; predicted gene, 21708	Coding
TSUnmapped00000019.mm.1	5.25	5.02	1.17	0.0362	0.3914	Ccdc169	coiled-coil domain containing 169	Coding
TC0300003252.mm.1	4.21	3.99	1.17	0.0373	0.3932	Clca3a2; Clca2	chloride channel accessory 3A2; chloride channel calcium activated 2; chloride channel accessory 2	Multiple_Complex
TC0100000609.mm.1	10.83	10.6	1.17	0.0375	0.3932	Rpl37a	ribosomal protein L37a	Coding
TC0500002803.mm.1	4.31	4.08	1.17	0.0427	0.4043	Gk2	glycerol kinase 2	Coding
TC0200003433.mm.1	11.64	11.41	1.17	0.0431	0.4043	Rpl35	ribosomal protein L35	Multiple_Complex
TC1300001447.mm.1	5.14	4.91	1.17	0.0432	0.4043	Actn2	actinin alpha 2	Coding
TC1000000295.mm.1	3.91	3.68	1.17	0.0436	0.4043	Trappc3l	trafficking protein particle complex 3 like	Coding
TC1400000649.mm.1	4.51	4.28	1.17	0.0438	0.4043	Trav3d-3	T cell receptor alpha variable 3D-3	Coding
TC0X00003416.mm.1	4.24	4.01	1.17	0.0479	0.4106	Ssxb8	synovial sarcoma, X member B, breakpoint 8	Coding
TC0400003362.mm.1	10.49	10.26	1.17	0.0484	0.411	Rps8; Snord38a	ribosomal protein S8; small nucleolar RNA, C/D box 38A	Multiple_Complex
TC0200004010.mm.1	4.86	4.63	1.17	0.049	0.4113	Olfr1167	olfactory receptor 1167	Coding
TC0700000737.mm.1	3.98	3.75	1.17	0.0496	0.4127	Vmn2r61	vomeronasal 2, receptor 61	Coding
TC0300000830.mm.1	4.1	3.87	1.18	0.0059	0.2717	Sprr2j-ps	small proline-rich protein 2J, pseudogene	Multiple_Complex
TC0500003215.mm.1	9.63	9.38	1.18	0.0062	0.2767	Ift81	intraflagellar transport 81	Multiple_Complex
TC0700004449.mm.1	3.53	3.29	1.18	0.008	0.2883	Clrn3	clarin 3	Coding
TC0400004209.mm.1	4.19	3.95	1.18	0.008	0.2891	Mup2; Mup1	major urinary protein 2 (Mup2), transcript variant 2, mRNA.; major urinary protein 2 (Mup2), transcript variant 3, mRNA.; major urinary protein 2 (Mup2), transcript variant 1, mRNA.; major urinary protein 2; major urinary protein 1	Multiple_Complex
TC1100001025.mm.1	4.36	4.12	1.18	0.0096	0.3013	Olfr387-ps1	olfactory receptor 387, pseudogene 1	Multiple_Complex
TC1100001306.mm.1	10.82	10.57	1.18	0.0097	0.3013	Atp5l-ps2	ATP synthase, H+ transporting, mitochondrial F0 complex, subunit G, pseudogene 2	Multiple_Complex
TC1100000989.mm.1	6.4	6.16	1.18	0.0104	0.3082	Xaf1	XIAP associated factor 1; Synthetic construct Mus musculus clone IMAGE:100016396, MGC:184534 XIAP associated factor 1 (Xaf1) mRNA, encodes complete protein.	Multiple_Complex
TC0700001490.mm.1	3.87	3.62	1.18	0.0116	0.3135	Olfr598	olfactory receptor 598	Coding
TC0600003155.mm.1	5.72	5.49	1.18	0.0133	0.3242	Ntf3	neurotrophin 3	Coding
TC0800000371.mm.1	7.25	7.01	1.18	0.0163	0.3369	Fut10	fucosyltransferase 10	Multiple_Complex
TC0700002780.mm.1	9.46	9.22	1.18	0.0171	0.3406	Mag	myelin-associated glycoprotein	Coding
TC1100003655.mm.1	9.02	8.78	1.18	0.0177	0.3432	Rpl23	ribosomal protein L23	Multiple_Complex
TC1300000482.mm.1	7.31	7.07	1.18	0.018	0.3455	Phactr1	phosphatase and actin regulator 1; phosphatase and actin regulator 1 (Phactr1), transcript variant 1, mRNA.	Multiple_Complex
TC1100003999.mm.1	5.96	5.72	1.18	0.0195	0.3501	Abca8a	ATP-binding cassette, sub-family A (ABC1), member 8a; Synthetic construct Mus musculus clone IMAGE:100069476, MGC:199378 ATP-binding cassette, sub-family A (ABC1), member 8a (Abca8a) mRNA, encodes complete protein.	Multiple_Complex
TC0400000681.mm.1	3.7	3.46	1.18	0.0195	0.3501	Mup-ps10	major urinary protein, pseudogene 10 [Source:MGI Symbol;Acc:MGI:3649623]	Multiple_Complex
TC0800001770.mm.1	6.38	6.15	1.18	0.0209	0.3556	Csmd1	CUB and Sushi multiple domains 1	Multiple_Complex
TC0600000206.mm.1	4.48	4.24	1.18	0.0211	0.3558	Hyal5	hyaluronoglucosaminidase 5	Coding
TC0700003657.mm.1	8.4	8.16	1.18	0.0213	0.3563	Fah	fumarylacetoacetate hydrolase	Multiple_Complex
TC0100003778.mm.1	6.57	6.33	1.18	0.0213	0.3563	Kcnk2	potassium channel, subfamily K, member 2	Coding
TC1100000422.mm.1	5.01	4.77	1.18	0.0247	0.366	Atp10b	ATPase, class V, type 10B	Multiple_Complex
TC0X00002853.mm.1	8.59	8.35	1.18	0.0254	0.3678	Hmgn5	high-mobility group nucleosome binding domain 5	Coding
TC1700000297.mm.1	3.98	3.74	1.18	0.0264	0.372	Vmn2r112	vomeronasal 2, receptor 112	Coding
TC1500001141.mm.1	4.57	4.33	1.18	0.0266	0.3725	Egln3	EGL nine homolog 3 (C. elegans), mRNA (cDNA clone MGC:36685 IMAGE:5371854), complete cds.	Coding
TC1400000916.mm.1	4.91	4.67	1.18	0.0281	0.3747			Multiple_Complex
TSUnmapped00000041.mm.1	3.52	3.28	1.18	0.0285	0.3756	Prl8a2	prolactin family 8, subfamily a, member 2	Coding
TC1200001231.mm.1	7.08	6.85	1.18	0.0294	0.3776	Traf3	TNF receptor-associated factor 3	Multiple_Complex
TC0500000386.mm.1	4.86	4.62	1.18	0.0308	0.381	Msantd1	Myb/SANT-like DNA-binding domain containing 1	Coding
TC0100003432.mm.1	4.52	4.29	1.18	0.0317	0.3838	Xcl1	chemokine (C motif) ligand 1	Coding
TC1100003717.mm.1	3.66	3.42	1.18	0.0327	0.3851	Krtap1-4	keratin associated protein 1-4	Coding
TC0X00003227.mm.1	3.93	3.69	1.18	0.0327	0.3851	Magea6	melanoma antigen, family A, 6	Coding
TC1000002886.mm.1	12.16	11.92	1.18	0.0332	0.3865	Trhde	TRH-degrading enzyme	Multiple_Complex
TC0400002572.mm.1	9.65	9.41	1.18	0.0348	0.3875	Tomm5	translocase of outer mitochondrial membrane 5 homolog (yeast)	Coding
TC1700001610.mm.1	4.39	4.15	1.18	0.0363	0.3918	Sbpl	spermine binding protein-like	Coding
TC0X00001319.mm.1	8.09	7.85	1.18	0.0378	0.3938	Bex4	brain expressed gene 4	Coding
TC0900000205.mm.1	3.84	3.59	1.18	0.0381	0.3948	Angptl8	angiopoietin-like 8	Coding
TC0100000999.mm.1	8.46	8.22	1.18	0.0403	0.3992	Cdh20	cadherin 20	Coding
TC1500000557.mm.1	6.25	6.01	1.18	0.0418	0.4018	Gpihbp1	GPI-anchored HDL-binding protein 1	Coding
TC0700003921.mm.1	4.29	4.05	1.18	0.042	0.4028	Olfr643; Olfr639	olfactory receptor 643; olfactory receptor 639	Coding
TC0700000565.mm.1	4.08	3.84	1.18	0.0422	0.4035	Arhgap33os	Rho GTPase activating protein 33, opposite strand	Multiple_Complex
TC0X00003143.mm.1	4.76	4.53	1.18	0.0477	0.4104	Il13ra2	interleukin 13 receptor, alpha 2	Coding
TC0700003772.mm.1	5.18	4.94	1.18	0.049	0.4113	Omp	olfactory marker protein	Coding
TSUnmapped00000030.mm.1	3.43	3.19	1.18	0.0491	0.4113	H60a	histocompatibility 60a	Coding
TC0Y00000300.mm.1	4.39	4.13	1.19	0.0057	0.2691	FJ541100; 1700040F15Rik	adult male testis cDNA, RIKEN full-length enriched library, clone:4932704C20 product:weakly similar to X-LINKED LYMPHOCYTE-REGULATED PROTEIN PM1 [], full insert sequence.; RIKEN cDNA 1700040F15 gene	Multiple_Complex
TC1100003696.mm.1	6.02	5.76	1.19	0.0068	0.283	Ccr7	chemokine (C-C motif) receptor 7	Coding
TC0600002154.mm.1	5.26	5.01	1.19	0.0068	0.283	Try5	trypsin 5	Coding
TC0X00003116.mm.1	6.09	5.83	1.19	0.0069	0.2833	Dcx	doublecortin	Multiple_Complex
TC0200003937.mm.1	3.55	3.3	1.19	0.0073	0.2868	Olfr1062	olfactory receptor 1062	Coding
TC0X00002057.mm.1	10.61	10.36	1.19	0.0075	0.2869	Rpl39	ribosomal protein L39	Multiple_Complex
TC0X00002736.mm.1	4.03	3.78	1.19	0.0088	0.2984	Ercc6l	excision repair cross-complementing rodent repair deficiency complementation group 6 like	Coding
TC1000000412.mm.1	4.8	4.54	1.19	0.0108	0.3087	Speer5-ps1	spermatogenesis associated glutamate (E)-rich protein 5, pseudogene 1	Multiple_Complex
TC0600001404.mm.1	4.7	4.46	1.19	0.0121	0.3165	Clec4d	C-type lectin domain family 4, member d	Coding
TC0200003922.mm.1	3.78	3.53	1.19	0.0158	0.3347	Olfr1047	olfactory receptor 1047	Coding
TC1400001873.mm.1	3.48	3.23	1.19	0.0168	0.3396	Ear-ps7	eosinophil-associated, ribonuclease A family, pseudogene 7	Multiple_Complex
TC0200002834.mm.1	5.56	5.31	1.19	0.0173	0.3408	Oprl1	opioid receptor-like 1	Multiple_Complex
TC0500000627.mm.1	4.36	4.11	1.19	0.0175	0.3419	Rhoh	ras homolog gene family, member H	Multiple_Complex
TC0100001648.mm.1	3.5	3.24	1.19	0.0203	0.353	Olfr248	olfactory receptor 248	Coding
TC1500000779.mm.1	12.48	12.22	1.19	0.0207	0.3554	Rpl31-ps22	ribosomal protein L31, pseudogene 22	Multiple_Complex
TC1200002469.mm.1	4.81	4.56	1.19	0.0212	0.356	Ighv2-1	immunoglobulin heavy variable 2-1 [Source:MGI Symbol;Acc:MGI:4936981]	Coding
TC0800002571.mm.1	5.02	4.78	1.19	0.0221	0.359	Nanos3	nanos homolog 3 (Drosophila)	Coding
TC1100002163.mm.1	8.92	8.66	1.19	0.0222	0.3596	Rps15a-ps6	ribosomal protein S15A, pseudogene 6	Multiple_Complex
TC1500000718.mm.1	4.65	4.4	1.19	0.0232	0.3618	Mchr1	melanin-concentrating hormone receptor 1	Coding
TC1300001638.mm.1	5.23	4.98	1.19	0.0247	0.366	Hist1h2ac	histone cluster 1, H2ac	Multiple_Complex
TC0300000805.mm.1	3.9	3.65	1.19	0.0255	0.3687	S100a2	S100 calcium binding protein A2	Coding
TC0X00000189.mm.1	3.42	3.17	1.19	0.0258	0.3703	Dusp21	dual specificity phosphatase 21	Coding
TC0700003957.mm.1	3.93	3.68	1.19	0.0259	0.3706	Olfr666	olfactory receptor 666	Coding
TC0700003648.mm.1	7.16	6.9	1.19	0.0265	0.372	Cemip	cell migration inducing protein, hyaluronan binding	Multiple_Complex
TC0800000178.mm.1	4.77	4.52	1.19	0.027	0.373	Spag11a	sperm associated antigen 11A	Coding
TC0600000849.mm.1	6.25	6	1.19	0.0298	0.3787	Tmem150a	transmembrane protein 150A	Coding
TC0200001299.mm.1	4.33	4.08	1.19	0.0302	0.3793	Olfr1131	olfactory receptor 1131	Coding
TC1800001169.mm.1	9.54	9.29	1.19	0.0307	0.3804	Lrrtm2	leucine rich repeat transmembrane neuronal 2; Synthetic construct Mus musculus clone IMAGE:100015001, MGC:180336 leucine rich repeat transmembrane neuronal 2 (Lrrtm2) mRNA, encodes complete protein.	Coding
TC0600001821.mm.1	8.71	8.45	1.19	0.0311	0.3814	Shfm1	split hand/foot malformation (ectrodactyly) type 1	Coding
TC0200002056.mm.1	10.44	10.19	1.19	0.0313	0.3825	Plcb1	phospholipase C, beta 1	Multiple_Complex
TC1600001177.mm.1	6.67	6.42	1.19	0.0315	0.3829	Carhsp1	calcium regulated heat stable protein 1	Multiple_Complex
TC0200004087.mm.1	5.2	4.95	1.19	0.0318	0.3838	Olfr1272	olfactory receptor 1272	Coding
TC0300001490.mm.1	4.57	4.32	1.19	0.0323	0.3841	Lpar3	lysophosphatidic acid receptor 3	Coding
TC0700002770.mm.1	6.04	5.79	1.19	0.0327	0.3851	Upk1a	uroplakin 1A	Coding
TC1100003169.mm.1	4.23	3.97	1.19	0.0331	0.3865	Olfr380	olfactory receptor 380; Synthetic construct Mus musculus clone IMAGE:100015907, MGC:183490 olfactory receptor 380 (Olfr380) mRNA, encodes complete protein.	Coding
TC0X00001286.mm.1	7.51	7.26	1.19	0.0338	0.3871	Armcx1	armadillo repeat containing, X-linked 1	Multiple_Complex
TC0600000877.mm.1	4.11	3.86	1.19	0.0338	0.3871	Reg2	regenerating islet-derived 2	Coding
TC1700000009.mm.1	6.43	6.18	1.19	0.0339	0.3871	Tiam2	T cell lymphoma invasion and metastasis 2	Coding
TC0200004069.mm.1	2.77	2.51	1.19	0.0357	0.3899	Olfr1251	olfactory receptor 1251	Coding
TC1100002300.mm.1	5.99	5.74	1.19	0.0358	0.3905	Rpl12-ps2	ribosomal proteimn L12-ps2	Multiple_Complex
TC0700000350.mm.1	3.84	3.59	1.19	0.0383	0.3955	Nlrp4e	NLR family, pyrin domain containing 4E	Multiple_Complex
TC0300000904.mm.1	14.46	14.21	1.19	0.0408	0.4002	Hmgb1-ps5	high mobility group box 1, pseudogene 5	Multiple_Complex
TC1100001730.mm.1	4.94	4.69	1.19	0.0409	0.4004	Itgb3	integrin beta 3	Multiple_Complex
TC0700002461.mm.1	3.42	3.17	1.19	0.0414	0.4013	Psg17	pregnancy specific glycoprotein 17	Coding
TC0X00001147.mm.1	3.56	3.3	1.19	0.0416	0.4017	Ube2dnl2	ubiquitin-conjugating enzyme E2D N-terminal like 2	Coding
TC0X00000341.mm.1	4.7	4.46	1.19	0.0427	0.4043	Rhox3e; Rhox3a2	reproductive homeobox 3E (Rhox3e), mRNA.; reproductive homeobox 3A2; reproductive homeobox 3E	Coding
TC0400003633.mm.1	12.01	11.76	1.19	0.0453	0.4055	Nkain1	Na+/K+ transporting ATPase interacting 1	Multiple_Complex
TC0900000086.mm.1	10.5	10.24	1.19	0.0463	0.4076	Phxr4	per-hexamer repeat gene 4	Multiple_Complex
TC1400000630.mm.1	3.79	3.55	1.19	0.0479	0.4106	Trav10d	T cell receptor alpha variable 10D	Multiple_Complex
TC1200002474.mm.1	4.05	3.8	1.19	0.0498	0.413	Ighv6-4	immunoglobulin heavy variable V6-4	Coding
TC0700000241.mm.1	5.46	5.19	1.2	0.0067	0.2829	Gng8	guanine nucleotide binding protein (G protein), gamma 8	Coding
TC1700002293.mm.1	4.06	3.8	1.2	0.0073	0.286	Slc5a7	solute carrier family 5 (choline transporter), member 7	Coding
TC1600001421.mm.1	3.76	3.5	1.2	0.0088	0.299	Tmem207	transmembrane protein 207	Multiple_Complex
TC1700001635.mm.1	4.19	3.93	1.2	0.0092	0.3011	Npw	neuropeptide W	Coding
TC0X00000361.mm.1	4.53	4.26	1.2	0.0098	0.3028	Rhox13	reproductive homeobox 13	Coding
TC0500001120.mm.1	4.09	3.83	1.2	0.0102	0.3075	Vmn2r16	vomeronasal 2, receptor 16	Coding
TC1800000123.mm.1	4.61	4.36	1.2	0.0105	0.3085	Psma8	proteasome (prosome, macropain) subunit, alpha type, 8	Coding
TC0100002677.mm.1	4.22	3.96	1.2	0.0106	0.3085	Tm4sf20	transmembrane 4 L six family member 20	Multiple_Complex
TC0X00000436.mm.1	7.61	7.35	1.2	0.0108	0.3087	Rab33a	RAB33A, member RAS oncogene family; RAB33A, member of RAS oncogene family	Coding
TC1500002168.mm.1	4.33	4.06	1.2	0.0114	0.3129	Olfr286	olfactory receptor 286	Coding
TC0400002437.mm.1	11.62	11.35	1.2	0.0127	0.3204	Ndufb6	NADH dehydrogenase (ubiquinone) 1 beta subcomplex, 6	Coding
TC1900001163.mm.1	7.08	6.82	1.2	0.0128	0.3208	Dtx4	deltex 4 homolog (Drosophila)	Coding
TC0100003205.mm.1	3.84	3.58	1.2	0.0138	0.3274	Rgs13	regulator of G-protein signaling 13	Coding
TC0300002321.mm.1	4.7	4.44	1.2	0.0145	0.3298	Rxfp4	relaxin family peptide receptor 4	Coding
TC0100002350.mm.1	6.6	6.33	1.2	0.0148	0.331	Ankrd44	ankyrin repeat domain 44	Multiple_Complex
TC0200004892.mm.1	12.37	12.11	1.2	0.0158	0.3347	Rps15a-ps7	ribosomal protein S15A, pseudogene 7	Multiple_Complex
TC0400000668.mm.1	5.15	4.89	1.2	0.0171	0.3406	Mup-ps29	major urinary protein, pseudogene 29 [Source:MGI Symbol;Acc:MGI:3783596]	Multiple_Complex
TC1300001696.mm.1	3.7	3.43	1.2	0.0193	0.3488	Prl7a2	prolactin family 7, subfamily a, member 2	Coding
TC1100003729.mm.1	3.83	3.57	1.2	0.0195	0.3501	Krtap4-6	keratin associated protein 4-6	Coding
TC0900000151.mm.1	3.5	3.24	1.2	0.0217	0.3573	Olfr851	olfactory receptor 851	Coding
TC1800001444.mm.1	4.05	3.79	1.2	0.0217	0.3574	Spink13	serine peptidase inhibitor, Kazal type 13	Coding
TC1100001221.mm.1	4.96	4.69	1.2	0.0222	0.3596	Ccl11	chemokine (C-C motif) ligand 11	Coding
TC0200003697.mm.1	4.35	4.08	1.2	0.0255	0.3688	Spc25	SPC25, NDC80 kinetochore complex component, homolog (S. cerevisiae)	Multiple_Complex
TC0700001529.mm.1	3.56	3.3	1.2	0.0256	0.3693	Usp-ps	ubiquitin specific peptidase, pseudogene (USP17 homolog)	Multiple_Complex
TC1000002205.mm.1	5.11	4.85	1.2	0.0259	0.3704	Edar	ectodysplasin-A receptor	Coding
TC0700002192.mm.1	3.64	3.37	1.2	0.0261	0.3711	Vmn1r58	vomeronasal 1 receptor 58	Coding
TC1400002302.mm.1	4.11	3.85	1.2	0.0264	0.372	Adamdec1	ADAM-like, decysin 1	Coding
TC1400001174.mm.1	11.02	10.76	1.2	0.0287	0.3759	Uchl3	ubiquitin carboxyl-terminal esterase L3 (ubiquitin thiolesterase)	Coding
TC1900001729.mm.1	8.92	8.66	1.2	0.029	0.3768	Shtn1	shootin 1	Multiple_Complex
TC0600003528.mm.1	3.37	3.1	1.2	0.0291	0.3769	Igkv3-4	immunoglobulin kappa variable 3-4	Coding
TC0600002275.mm.1	3.81	3.55	1.2	0.0294	0.3776	Hoxa1	homeobox A1	Coding
TC1100003487.mm.1	4.82	4.56	1.2	0.0297	0.3782	Lpo	lactoperoxidase	Multiple_Complex
TC1600002012.mm.1	3.61	3.34	1.2	0.03	0.3791	Krtap13	keratin associated protein 13	Coding
TC1800000909.mm.1	3.92	3.66	1.2	0.0301	0.3793	Cd226	CD226 antigen	Coding
TC0200003860.mm.1	3.88	3.63	1.2	0.0351	0.3881	Zswim2	zinc finger SWIM-type containing 2	Multiple_Complex
TC0400004013.mm.1	4.03	3.77	1.2	0.0385	0.396	Draxin	dorsal inhibitory axon guidance protein	Multiple_Complex
TC0200002038.mm.1	6.69	6.43	1.2	0.0409	0.4004	Rpl23a-ps4	ribosomal protein L23A, pseudogene 4	Multiple_Complex
TC1200000751.mm.1	5.88	5.61	1.2	0.0409	0.4004	Smoc1	SPARC related modular calcium binding 1; SPARC related modular calcium binding 1	Multiple_Complex
TC0400003097.mm.1	7.16	6.9	1.2	0.0412	0.4012	Cyp2j6	cytochrome P450, family 2, subfamily j, polypeptide 6	Coding
TC0700002468.mm.1	5.06	4.8	1.2	0.0422	0.4035	Foxa3	forkhead box A3	Multiple_Complex
TC1100002653.mm.1	4.02	3.76	1.2	0.0427	0.4043	Olfr1396	olfactory receptor 1396	Coding
TC1800001177.mm.1	4.87	4.61	1.2	0.0428	0.4043	Prob1	proline rich basic protein 1	Coding
TC0700002202.mm.1	4.06	3.8	1.2	0.0435	0.4043	Vmn1r65	vomeronasal 1 receptor 65	Coding
TC0400004123.mm.1	4.52	4.25	1.2	0.045	0.4053	Actrt2	actin-related protein T2	Coding
TC0200004000.mm.1	3.43	3.17	1.2	0.0456	0.4062	Olfr1157	olfactory receptor 1157	Coding
TC1700002662.mm.1	4.87	4.6	1.2	0.0468	0.4083	Six2	sine oculis-related homeobox 2	Coding
TC0100002261.mm.1	5.2	4.94	1.2	0.0486	0.4112	Fhl2	four and a half LIM domains 2; four and a half LIM domains 2 (Fhl2), mRNA.	Coding
TC1600000228.mm.1	3.65	3.38	1.21	0.0032	0.2425	Tssk2	testis-specific serine kinase 2	Coding
TC1300000303.mm.1	3.93	3.66	1.21	0.004	0.2556	Prl8a2	prolactin family 8, subfamily a, member 2	Coding
TC0400002391.mm.1	6.04	5.77	1.21	0.0063	0.2774	Smim8	small integral membrane protein 8	Multiple_Complex
TC0800001079.mm.1	4.25	3.98	1.21	0.0085	0.2955	Capns2	calpain, small subunit 2	Coding
TC0900002060.mm.1	3.81	3.54	1.21	0.0115	0.3129	Olfr915	olfactory receptor 915; olfactory receptor 915 (Olfr915), mRNA.	Coding
TC1400001656.mm.1	9.32	9.05	1.21	0.0137	0.3269	Cacna1d	calcium channel, voltage-dependent, L type, alpha 1D subunit; Synthetic construct Mus musculus clone IMAGE:100069537, MGC:199439 calcium channel, voltage-dependent, L type, alpha 1D subunit (Cacna1d) mRNA, encodes complete protein.	Coding
TC0400004113.mm.1	4.04	3.76	1.21	0.0148	0.3315	Ccdc27	coiled-coil domain containing 27	Coding
TC0100002921.mm.1	7.49	7.21	1.21	0.0186	0.3475	Dsel	dermatan sulfate epimerase-like; dermatan sulfate epimerase-like (Dsel), mRNA.	Coding
TC0900000540.mm.1	11.08	10.8	1.21	0.019	0.3482	Fxyd6	FXYD domain-containing ion transport regulator 6	Multiple_Complex
TC0700003875.mm.1	3.92	3.64	1.21	0.019	0.3481	Olfr577	olfactory receptor 577	Coding
TC0900003082.mm.1	3.92	3.65	1.21	0.0231	0.3618	Fbxw28	F-box and WD-40 domain protein 28	Coding
TC1200000800.mm.1	4.22	3.95	1.21	0.0232	0.3622	Acot3	acyl-CoA thioesterase 3	Coding
TC1100001849.mm.1	4.29	4.01	1.21	0.0245	0.3657	Kcnj2	potassium inwardly-rectifying channel, subfamily J, member 2	Coding
TC1800001296.mm.1	8	7.73	1.21	0.0253	0.3677	Ccdc112	coiled-coil domain containing 112	Multiple_Complex
TC1000001580.mm.1	13.37	13.09	1.21	0.0265	0.3721	Naca	nascent polypeptide-associated complex alpha polypeptide	Coding
TC0900003014.mm.1	4.22	3.95	1.21	0.0273	0.3734	Iqcf4	IQ motif containing F4	Multiple_Complex
TC0600001475.mm.1	3.6	3.33	1.21	0.0279	0.3747	Fgf6	fibroblast growth factor 6; Synthetic construct Mus musculus clone IMAGE:100014661, MGC:175466 fibroblast growth factor 6 (Fgf6) mRNA, encodes complete protein.	Coding
TC0400001087.mm.1	4.42	4.14	1.21	0.0315	0.3829	C8b	complement component 8, beta polypeptide	Multiple_Complex
TC0200001314.mm.1	4.39	4.11	1.21	0.0325	0.3845	Olfr1161	olfactory receptor 1161	Coding
TC1900000230.mm.1	3.92	3.64	1.21	0.0328	0.3856	Oosp3	oocyte secreted protein 3	Coding
TC0800000521.mm.1	4.9	4.63	1.21	0.0339	0.3871	Pdlim3	PDZ and LIM domain 3	Coding
TC0600001008.mm.1	3.48	3.21	1.21	0.0341	0.3875	Bmp10	bone morphogenetic protein 10	Coding
TC0400001229.mm.1	4.23	3.95	1.21	0.0353	0.3885	Cyp4a31	cytochrome P450, family 4, subfamily a, polypeptide 31	Coding
TC0900003121.mm.1	5.25	4.97	1.21	0.0355	0.3894	Tdgf1	teratocarcinoma-derived growth factor 1	Coding
TC0900002696.mm.1	4.41	4.14	1.21	0.04	0.3988	Tinag	tubulointerstitial nephritis antigen	Coding
TC1700000800.mm.1	4.72	4.45	1.21	0.0411	0.401	Olfr136	olfactory receptor 136; Synthetic construct Mus musculus clone IMAGE:100062219, MGC:190418 olfactory receptor 136 (Olfr136) mRNA, encodes complete protein.	Coding
TC1400000586.mm.1	4.55	4.27	1.21	0.0422	0.4032	Vmn2r-ps111; RP23-126F14.5	vomeronasal 2, receptor, pseudogene 111 [Source:MGI Symbol;Acc:MGI:3761530]; novel transcript sense overlapping Vmn2r88	Multiple_Complex
TC0200000676.mm.1	3.74	3.46	1.21	0.0427	0.4043	Olfr357	olfactory receptor 357	Coding
TC0200004014.mm.1	3.46	3.19	1.21	0.0456	0.4063	Olfr1173	olfactory receptor 1173	Coding
TC0300000802.mm.1	7.99	7.7	1.22	0.003	0.2371	S100a16	S100 calcium binding protein A16	Multiple_Complex
TC0200002148.mm.1	5.08	4.8	1.22	0.0034	0.2446	Zfp133-ps; Gm38402	zinc finger protein 133, pseudogene; zinc finger protein pseudogene	Multiple_Complex
TC1000000713.mm.1	4.53	4.24	1.22	0.0036	0.2485	Upb1	ureidopropionase, beta	Multiple_Complex
TC0200005315.mm.1	6.05	5.76	1.22	0.004	0.2556	Rpl30-ps5	ribosomal protein L30, pseudogene 5	Multiple_Complex
TC0500002633.mm.1	4.52	4.24	1.22	0.0069	0.2833	Nmu	neuromedin U	Coding
TC0200003994.mm.1	3.53	3.25	1.22	0.0086	0.2955	Olfr1138	olfactory receptor 1138	Coding
TC0700001532.mm.1	4.54	4.25	1.22	0.0089	0.2991	Olfr661	olfactory receptor 661	Coding
TC1700001665.mm.1	7.58	7.29	1.22	0.0089	0.2991	Sox8	SRY (sex determining region Y)-box 8; SRY-box containing gene 8	Coding
TC1400000913.mm.1	4.08	3.79	1.22	0.0094	0.3011	Rp1l1	retinitis pigmentosa 1 homolog (human)-like 1	Coding
TC0200003958.mm.1	3.52	3.23	1.22	0.0107	0.3085	Olfr1095	olfactory receptor 1095	Coding
TC0700002452.mm.1	3.95	3.66	1.22	0.0108	0.309	Psg28	pregnancy-specific glycoprotein 28	Coding
TC1600000918.mm.1	10.68	10.39	1.22	0.0119	0.3147	Ncam2	neural cell adhesion molecule 2	Coding
TC0400002532.mm.1	5.98	5.69	1.22	0.0122	0.3171	Msmp	microseminoprotein, prostate associated	Coding
TC0200003917.mm.1	4.07	3.78	1.22	0.0122	0.3174	Olfr1043	olfactory receptor 1043	Coding
TC1600001580.mm.1	4.31	4.02	1.22	0.0127	0.3204	Cd86	CD86 antigen	Multiple_Complex
TC1700000060.mm.1	10.57	10.28	1.22	0.0141	0.3275	Dynlt1b	dynein light chain Tctex-type 1B	Multiple_Complex
TC0100003738.mm.1	4.25	3.96	1.22	0.016	0.3351	2001-03-01	mitochondrial amidoxime reducing component 1	Coding
TC0200004248.mm.1	4.12	3.84	1.22	0.0172	0.3408	Pin1rt1	protein (peptidyl-prolyl cis/trans isomerase) NIMA-interacting 1, retrogene 1	Coding
TC1500002186.mm.1	4.35	4.07	1.22	0.0173	0.3409	Fkbp11	FK506 binding protein 11	Coding
TC0200003930.mm.1	10.38	10.09	1.22	0.0192	0.3487	Olfr1055	olfactory receptor 1055	Coding
TC0600000627.mm.1	4.43	4.14	1.22	0.0225	0.3603	Evx1	even skipped homeotic gene 1 homolog	Coding
TC0700003958.mm.1	3.75	3.47	1.22	0.0232	0.362	Olfr667	olfactory receptor 667	Coding
TC0300000800.mm.1	7.2	6.92	1.22	0.0252	0.3673	S100a13	S100 calcium binding protein A13	Coding
TC0900000809.mm.1	4.62	4.34	1.22	0.0272	0.3731	Lctl	lactase-like	Multiple_Complex
TC0500002428.mm.1	4.69	4.4	1.22	0.0277	0.3743	Cckar; Rnu7	cholecystokinin A receptor; U7 small nuclear RNA	Multiple_Complex
TC1100000469.mm.1	5.45	5.17	1.22	0.0292	0.3771	Fndc9	fibronectin type III domain containing 9	Coding
TC0600000448.mm.1	4.09	3.8	1.22	0.0294	0.3776	Sval1	seminal vesicle antigen-like 1	Coding
TC0800001809.mm.1	4.57	4.28	1.22	0.0306	0.3804	Defa-ps15	defensin, alpha, pseudogene 15	Multiple_Complex
TC1600001624.mm.1	11.27	10.99	1.22	0.0322	0.3838	Gap43	growth associated protein 43	Multiple_Complex
TC0500000581.mm.1	4.34	4.05	1.22	0.0334	0.387	Dthd1	death domain containing 1	Coding
TC1000000306.mm.1	5.93	5.65	1.22	0.0413	0.4013	Hs3st5	heparan sulfate (glucosamine) 3-O-sulfotransferase 5	Multiple_Complex
TC1400002796.mm.1	3.85	3.57	1.22	0.0414	0.4014	Cphx2; Cphx1	cytoplasmic polyadenylated homeobox 2; cytoplasmic polyadenylated homeobox 1 (Cphx1), mRNA.	Multiple_Complex
TC1700002322.mm.1	4.03	3.75	1.22	0.0426	0.4043	Arrdc5	arrestin domain containing 5	Coding
TC0900002764.mm.1	10.33	10.04	1.22	0.0458	0.4069	Hmgn3	high mobility group nucleosomal binding domain 3	Multiple_Complex
TC0200000416.mm.1	5.45	5.17	1.22	0.0472	0.4089	Fut7	fucosyltransferase 7; fucosyltransferase 7 (Fut7), transcript variant 2, mRNA.	Multiple_Complex
TC0500001702.mm.1	5.27	4.97	1.23	0.0033	0.2426	Sdk1	sidekick homolog 1 (chicken)	Multiple_Complex
TC0200001245.mm.1	3.7	3.41	1.23	0.0034	0.2457	Olfr1009	olfactory receptor 1009	Coding
TC0200003212.mm.1	6.34	6.05	1.23	0.0037	0.2504	Fam163b	family with sequence similarity 163, member B	Coding
TC1000001688.mm.1	8.03	7.73	1.23	0.0043	0.2581	Rgs17	regulator of G-protein signaling 17	Multiple_Complex
TC0Y00000493.mm.1	4.49	4.19	1.23	0.0063	0.2774	Ssty2; Gm21257	spermiogenesis specific transcript on the Y 2; predicted gene, 21257; spermiogenesis specific transcript on the Y 2, mRNA (cDNA clone MGC:151463 IMAGE:40126405), complete cds.	Coding
TC0700002528.mm.1	4.37	4.08	1.23	0.0063	0.2774	Vmn1r114	vomeronasal 1 receptor 114	Coding
TC1200002080.mm.1	6.1	5.8	1.23	0.0074	0.2868	Syndig1l	synapse differentiation inducing 1 like	Coding
TC0400003421.mm.1	9.38	9.08	1.23	0.0086	0.2955	Ybx1	Y box protein 1	Multiple_Complex
TC0700001524.mm.1	3.8	3.5	1.23	0.0101	0.305	Olfr652	olfactory receptor 652	Coding
TC0500000809.mm.1	6.5	6.2	1.23	0.0101	0.3061	Prol1	proline rich, lacrimal 1	Coding
TC0100000883.mm.1	5.77	5.47	1.23	0.0107	0.3087	Prlh	prolactin releasing hormone	Coding
TC0300001800.mm.1	5.22	4.92	1.23	0.0109	0.3106	Kcnmb3	potassium large conductance calcium-activated channel, subfamily M, beta member 3	Coding
TC0200003940.mm.1	4.09	3.79	1.23	0.0127	0.3204	Olfr1066	olfactory receptor 1066	Coding
TC0500002939.mm.1	7.88	7.57	1.23	0.0144	0.329	Rps19-ps8	ribosomal protein S19, pseudogene 8	Multiple_Complex
TC0400000665.mm.1	4.08	3.78	1.23	0.0148	0.331	Mup-ps2	major urinary protein, pseudogene 2	Multiple_Complex
TC0700001668.mm.1	8.71	8.41	1.23	0.017	0.3406	Spon1	spondin 1, (f-spondin) extracellular matrix protein	Multiple_Complex
TC0600001403.mm.1	4.87	4.58	1.23	0.0212	0.3559	Clec4n	C-type lectin domain family 4, member n	Multiple_Complex
TC0200004906.mm.1	3.22	2.92	1.23	0.0275	0.3735	Defb19	defensin beta 19	Coding
TC1000002781.mm.1	3.85	3.55	1.23	0.0307	0.381	Alx1	ALX homeobox 1	Multiple_Complex
TC1300000244.mm.1	12.08	11.78	1.23	0.0322	0.3838	Hist1h4h	histone cluster 1, H4h	Coding
TC1100000428.mm.1	9.53	9.23	1.23	0.0336	0.3871	Ccnjl	cyclin J-like	Multiple_Complex
TC0X00001285.mm.1	7.27	6.97	1.23	0.039	0.396	Armcx4	armadillo repeat containing, X-linked 4	Coding
TC0700002526.mm.1	4.8	4.5	1.23	0.0426	0.4043	Vmn1r111; Vmn1r131; Vmn1r166; Vmn1r138	vomeronasal 1 receptor 111; vomeronasal 1 receptor 131 (Vmn1r131), mRNA.; vomeronasal 1 receptor 166 (Vmn1r166), mRNA.; vomeronasal 1 receptor 138 (Vmn1r138), mRNA.	Coding
TC0500002672.mm.1	6.3	6	1.24	0.0025	0.2306	Epha5	Eph receptor A5	Multiple_Complex
TC0500002320.mm.1	8.64	8.34	1.24	0.0038	0.2523	Prom1	prominin 1	Coding
TC0700002364.mm.1	3.9	3.59	1.24	0.004	0.2556	Vmn1r87	vomeronasal 1 receptor 87	Coding
TC0100001330.mm.1	8.13	7.82	1.24	0.0049	0.2607	Brinp3	bone morphogenetic protein/retinoic acid inducible neural specific 3	Multiple_Complex
TC0400001989.mm.1	11.61	11.31	1.24	0.0079	0.2876	Rps15a-ps3	ribosomal protein S15A, pseudogene 3 [Source:MGI Symbol;Acc:MGI:3650886]	Multiple_Complex
TC1300002144.mm.1	4.62	4.31	1.24	0.0148	0.3307	Tpbpa	trophoblast specific protein alpha	Coding
TC0200000379.mm.1	4.22	3.91	1.24	0.0151	0.3329	Il1f5	interleukin 1 family, member 5 (delta)	Multiple_Complex
TC1000001649.mm.1	4.01	3.7	1.24	0.016	0.3351	Olfr800	olfactory receptor 800	Coding
TC1800000171.mm.1	6.24	5.93	1.24	0.0165	0.3379	Asxl3	additional sex combs like 3 (Drosophila)	Multiple_Complex
TSUnmapped00000042.mm.1	7.89	7.58	1.24	0.0214	0.3563	E2f3	E2F transcription factor 3	Coding
TC0800000185.mm.1	5.39	5.08	1.24	0.0229	0.3614	Defb3	defensin beta 3	Coding
TC0300002241.mm.1	4.87	4.56	1.24	0.0251	0.3673	Mnd1	meiotic nuclear divisions 1 homolog (S. cerevisiae)	Coding
TC0X00002738.mm.1	9.08	8.78	1.24	0.0266	0.3725	Rps4x	ribosomal protein S4, X-linked; ribosomal protein S4, X-linked (Rps4x), mRNA.	Multiple_Complex
TC0700002544.mm.1	4.81	4.5	1.24	0.0319	0.3838	Vmn1r111; Vmn1r131; Vmn1r166; Vmn1r138	vomeronasal 1 receptor 111 (Vmn1r111), mRNA.; vomeronasal 1 receptor 131 (Vmn1r131), mRNA.; vomeronasal 1 receptor 166; vomeronasal 1 receptor 138 (Vmn1r138), mRNA.; vomeronasal 1 receptor 131; vomeronasal 1 receptor 111	Coding
TC0700002552.mm.1	4.81	4.5	1.24	0.0319	0.3838	Vmn1r111; Vmn1r131; Vmn1r166; Vmn1r138	vomeronasal 1 receptor 111 (Vmn1r111), mRNA.; vomeronasal 1 receptor 131 (Vmn1r131), mRNA.; vomeronasal 1 receptor 166 (Vmn1r166), mRNA.; vomeronasal 1 receptor 138 (Vmn1r138), mRNA.; vomeronasal 1 receptor 138; vomeronasal 1 receptor 111	Coding
TC0700002581.mm.1	4.81	4.5	1.24	0.0319	0.3838	Vmn1r111; Vmn1r131; Vmn1r166; Vmn1r138	vomeronasal 1 receptor 111 (Vmn1r111), mRNA.; vomeronasal 1 receptor 131; vomeronasal 1 receptor 166 (Vmn1r166), mRNA.; vomeronasal 1 receptor 138; vomeronasal 1 receptor 166; vomeronasal 1 receptor 111	Coding
TC0400000672.mm.1	5.66	5.35	1.24	0.0322	0.3838	Mup-ps26	major urinary protein, pseudogene 26 [Source:MGI Symbol;Acc:MGI:3705793]	Multiple_Complex
TC1100002421.mm.1	9.05	8.74	1.24	0.0377	0.3932	Rps27a	ribosomal protein S27A	Multiple_Complex
TC0700002525.mm.1	4.09	3.77	1.24	0.0389	0.396	Vmn1r-ps71	vomeronasal 1 receptor, pseudogene 71	Multiple_Complex
TC0600002362.mm.1	4.7	4.38	1.24	0.0393	0.3971	Vmn1r25	vomeronasal 1 receptor 25	Coding
TC1200000260.mm.1	3.16	2.85	1.24	0.0421	0.403	Fam110c	family with sequence similarity 110, member C	Coding
TC1700001301.mm.1	4.59	4.28	1.24	0.0424	0.4042	Tmem247	transmembrane protein 247	Coding
TC1700001539.mm.1	3.71	3.4	1.24	0.0439	0.4043	Vmn1r-ps143	vomeronasal 1 receptor, pseudogene 143	Multiple_Complex
TC1900000397.mm.1	5.29	4.98	1.24	0.0445	0.4043	Tmem252	transmembrane protein 252	Coding
TC0200002287.mm.1	5.37	5.07	1.24	0.0446	0.4046	Defb20	defensin beta 20	Coding
TC0X00000171.mm.1	3.85	3.53	1.25	0.0025	0.2306	Gpr82	G protein-coupled receptor 82	Coding
TC0400004213.mm.1	4.41	4.1	1.25	0.0036	0.2485	Mup2; Mup1	major urinary protein 2, mRNA (cDNA clone MGC:18535 IMAGE:4196403), complete cds.; major urinary protein 1, mRNA (cDNA clone MGC:46757 IMAGE:4161709), complete cds.; major urinary protein 2, mRNA (cDNA clone MGC:70247 IMAGE:4159984), complete cds.; major urinary protein 1, mRNA (cDNA clone MGC:118604 IMAGE:947916), complete cds.	Coding
TC1000001755.mm.1	9.78	9.46	1.25	0.0039	0.254	Utrn	utrophin	Coding
TC0700001197.mm.1	4.95	4.63	1.25	0.005	0.2607	Tmc3	transmembrane channel-like gene family 3; Synthetic construct Mus musculus clone IMAGE:100062258, MGC:190435 transmembrane channel-like gene family 3 (Tmc3) mRNA, encodes complete protein.	Multiple_Complex
TC0600000465.mm.1	3.13	2.82	1.25	0.0053	0.2647	Olfr453	olfactory receptor 453	Coding
TC0900000136.mm.1	4.36	4.04	1.25	0.0055	0.2664	Mbd3l1	methyl-CpG binding domain protein 3-like 1	Coding
TC0700003614.mm.1	6.73	6.42	1.25	0.0068	0.2831	Homer2	homer homolog 2 (Drosophila); Synthetic construct Mus musculus clone IMAGE:100016307, MGC:184517 homer homolog 2 (Drosophila) (Homer2) mRNA, encodes complete protein.	Multiple_Complex
TC0700001955.mm.1	3.56	3.24	1.25	0.0075	0.2868	Nps	neuropeptide S	Coding
TC0800002440.mm.1	7.45	7.12	1.25	0.0086	0.2955	B3gnt3	UDP-GlcNAc:betaGal beta-1,3-N-acetylglucosaminyltransferase 3	Coding
TC0X00000223.mm.1	4.44	4.13	1.25	0.0106	0.3085	Ssxa1	synovial sarcoma, X member A, breakpoint 1	Multiple_Complex
TC1300001096.mm.1	4.36	4.03	1.25	0.0148	0.3315	Gcnt4	glucosaminyl (N-acetyl) transferase 4, core 2 (beta-1,6-N-acetylglucosaminyltransferase)	Coding
TC0700000212.mm.1	4.57	4.24	1.25	0.0156	0.3334	Obox5	oocyte specific homeobox 5	Coding
TC1800001009.mm.1	9.14	8.82	1.25	0.0156	0.333	Ss18	synovial sarcoma translocation, Chromosome 18	Coding
TC0700000788.mm.1	4.11	3.79	1.25	0.0199	0.3512	Klk1b27	kallikrein 1-related peptidase b27	Coding
TC0200003944.mm.1	4.2	3.87	1.25	0.0199	0.3516	Olfr1077-ps1	olfactory receptor 1077, pseudogene 1	Multiple_Complex
TC0700001586.mm.1	3.63	3.31	1.25	0.02	0.352	Olfr473	olfactory receptor 473	Coding
TC0500002702.mm.1	4.13	3.8	1.25	0.021	0.3558	Csn2	casein beta; casein beta (Csn2), mRNA.	Multiple_Complex
TC0100001510.mm.1	4.38	4.05	1.25	0.0232	0.3622	Dpt	dermatopontin	Coding
TC1100000496.mm.1	4.15	3.83	1.25	0.0241	0.365	Ifi47; Olfr56	interferon gamma inducible protein 47; olfactory receptor 56	Multiple_Complex
TC1400000690.mm.1	3.87	3.55	1.25	0.0345	0.3875	Trav7-2	T cell receptor alpha variable 7-2	Coding
TC1000000195.mm.1	3.91	3.59	1.25	0.037	0.3932	Taar2	trace amine-associated receptor 2	Coding
TC0200004323.mm.1	4.35	4.02	1.25	0.0373	0.3932	Olfr1290	olfactory receptor 1290	Coding
TC0500002694.mm.1	3.74	3.42	1.25	0.0378	0.3936	Ugt2b37	UDP glucuronosyltransferase 2 family, polypeptide B37	Coding
TC0X00000652.mm.1	7.49	7.17	1.25	0.0418	0.4022	Hmgb3	high mobility group box 3	Multiple_Complex
TC0700002568.mm.1	4.03	3.7	1.25	0.0427	0.4043	Vmn1r-ps80	vomeronasal 1 receptor, pseudogene 80	Multiple_Complex
TC0800000132.mm.1	7.5	7.18	1.25	0.0438	0.4043	Upf3a	UPF3 regulator of nonsense transcripts homolog A (yeast)	Coding
TC1900000405.mm.1	3.62	3.3	1.25	0.0487	0.4112	Dmrt3	doublesex and mab-3 related transcription factor 3	Coding
TC1200002576.mm.1	4.49	4.17	1.25	0.0487	0.4112	Ighv14-1	immunoglobulin heavy variable 14-1	Coding
TC0600002504.mm.1	8.37	8.04	1.26	0.0016	0.2071	Tmsb10	thymosin, beta 10	Multiple_Complex
TC1100002686.mm.1	4.39	4.06	1.26	0.006	0.2735	Prop1	paired like homeodomain factor 1; Synthetic construct Mus musculus clone IMAGE:100064078, MGC:193449 paired like homeodomain factor 1 (Prop1) mRNA, encodes complete protein.	Multiple_Complex
TC0Y00000434.mm.1	4.51	4.17	1.26	0.0074	0.2868	Ssty2	spermiogenesis specific transcript on the Y 2 (Ssty2), mRNA.; spermiogenesis specific transcript on the Y 2, mRNA (cDNA clone MGC:151463 IMAGE:40126405), complete cds.; spermiogenesis specific transcript on the Y 2	Coding
TC0Y00000059.mm.1	4.51	4.17	1.26	0.0074	0.2868	Ssty2; Gm21065	spermiogenesis specific transcript on the Y 2 (Ssty2), mRNA.; predicted gene, 21065; spermiogenesis specific transcript on the Y 2	Coding
TC0700003696.mm.1	4.45	4.11	1.26	0.0084	0.2944	Olfr298	olfactory receptor 298	Coding
TC0100001788.mm.1	5.71	5.38	1.26	0.0084	0.2938	Slc30a10	solute carrier family 30, member 10; solute carrier family 30, member 10 (Slc30a10), mRNA.	Multiple_Complex
TC0400003661.mm.1	6.16	5.82	1.26	0.0096	0.3013	Rps15a-ps4	ribosomal protein S15A, pseudogene 4	Multiple_Complex
TC1400001293.mm.1	6.98	6.64	1.26	0.0098	0.3027	Hs6st3	heparan sulfate 6-O-sulfotransferase 3	Coding
TC1400000268.mm.1	4.04	3.71	1.26	0.0107	0.3087	Hesx1	homeobox gene expressed in ES cells	Coding
TC0600003582.mm.1	3.78	3.44	1.26	0.0107	0.3085	Igkv5-37	immunoglobulin kappa variable 5-37	Coding
TC1400000580.mm.1	4.55	4.22	1.26	0.0127	0.3204	Rnase6	ribonuclease, RNase A family, 6	Coding
TC1100000919.mm.1	4.22	3.89	1.26	0.0128	0.3204	Sox15	SRY (sex determining region Y)-box 15; SRY-box containing gene 15	Coding
TC0300002366.mm.1	11.39	11.05	1.26	0.0134	0.3243	Rps27rt; Rps27	ribosomal protein S27, retrogene; ribosomal protein S27	Multiple_Complex
TC0200001663.mm.1	7.32	6.98	1.26	0.0159	0.3348	Nop10	NOP10 ribonucleoprotein	Coding
TC0200001272.mm.1	4.58	4.25	1.26	0.0168	0.3396	Olfr1076	olfactory receptor 1076	Coding
TC0900001239.mm.1	3.01	2.68	1.26	0.0174	0.3412	Prr23a3	proline rich 23A, member 3	Coding
TC1300002553.mm.1	12.04	11.71	1.26	0.0187	0.3478	Pik3r1	phosphatidylinositol 3-kinase, regulatory subunit, polypeptide 1 (p85 alpha)	Coding
TC0600003347.mm.1	3.49	3.16	1.26	0.0189	0.3478	Igbp1b	immunoglobulin (CD79A) binding protein 1b	Coding
TC0800000560.mm.1	5.16	4.83	1.26	0.0195	0.3501	Cldn24	claudin 24	Multiple_Complex
TC1700001101.mm.1	6.54	6.21	1.26	0.0245	0.3657	Tmem200c	transmembrane protein 200C	Coding
TC0900002078.mm.1	4.38	4.04	1.26	0.0249	0.3664	Olfr44	olfactory receptor 44; Synthetic construct Mus musculus clone IMAGE:100063433, MGC:191083 olfactory receptor 44 (Olfr44) mRNA, encodes complete protein.	Coding
TC0700002816.mm.1	4.15	3.82	1.26	0.0269	0.373	Scgb2b24	secretoglobin, family 2B, member 24	Coding
TC1400002752.mm.1	10.38	10.05	1.26	0.028	0.3747	Zic5	zinc finger protein of the cerebellum 5	Multiple_Complex
TC0200001291.mm.1	3.49	3.16	1.26	0.0321	0.3838	Olfr1123	olfactory receptor 1123	Coding
TC0800000179.mm.1	4.95	4.62	1.26	0.0339	0.3872	Defb14	defensin beta 14	Coding
TC0900002450.mm.1	14.88	14.54	1.26	0.0358	0.3905	Rplp1	ribosomal protein, large, P1	Coding
TC0400000811.mm.1	5.37	5.04	1.26	0.0374	0.3932	Lurap1l	leucine rich adaptor protein 1-like	Coding
TC1900001418.mm.1	4.81	4.48	1.26	0.0375	0.3932	Ch25h	cholesterol 25-hydroxylase	Coding
TC0200000659.mm.1	4.49	4.16	1.26	0.0377	0.3932	Olfr339	olfactory receptor 339	Coding
TC0200002200.mm.1	3.53	3.19	1.26	0.0407	0.4	Cst12	cystatin 12	Coding
TC1500002177.mm.1	16.95	16.61	1.26	0.042	0.4026	Snora34; Mir1291	small nucleolar RNA, H/ACA box 34; microRNA 1291	Multiple_Complex
TC1400000620.mm.1	4.66	4.32	1.26	0.0468	0.4083	Trav6-2	T cell receptor alpha variable 6-2	Coding
TC0700001269.mm.1	8.15	7.82	1.26	0.0482	0.411	Me3	malic enzyme 3, NADP(+)-dependent, mitochondrial	Multiple_Complex
TC1600001722.mm.1	9.9	9.55	1.27	0.0017	0.2107	Alcam	activated leukocyte cell adhesion molecule	Multiple_Complex
TC1000001634.mm.1	4.09	3.74	1.27	0.0023	0.2289	Olfr776	olfactory receptor 776	Coding
TC1400001752.mm.1	8.02	7.68	1.27	0.0025	0.2306	Nrg3	neuregulin 3	Multiple_Complex
TC0400003002.mm.1	5.01	4.66	1.27	0.0031	0.2408	Ifna9; Ifna15; Ifna6	interferon alpha 9; interferon alpha 15; interferon alpha 6	Coding
TC0700002015.mm.1	4.66	4.31	1.27	0.0039	0.2551	Olfr46	olfactory receptor 46	Coding
TC1000000147.mm.1	9.46	9.12	1.27	0.0041	0.2562	Map3k5	mitogen-activated protein kinase kinase kinase 5	Multiple_Complex
TC1100001566.mm.1	5.7	5.35	1.27	0.0044	0.2581	Tcap	titin-cap	Coding
TC0700002539.mm.1	4.21	3.87	1.27	0.0045	0.2581	Vmn1r127	vomeronasal 1 receptor 127	Coding
TC0600003563.mm.1	4.62	4.27	1.27	0.0059	0.2719	Igkv4-63	immunoglobulin kappa variable 4-63	Coding
TC0200004356.mm.1	7.38	7.04	1.27	0.0085	0.2955	Ryr3	ryanodine receptor 3	Multiple_Complex
TC1100003919.mm.1	5.43	5.09	1.27	0.0088	0.2987	Gh	growth hormone	Coding
TC0100001877.mm.1	9.55	9.21	1.27	0.0094	0.3011	Plxna2	plexin A2	Multiple_Complex
TC0100003233.mm.1	6.34	6	1.27	0.0137	0.3274	Pla2g4a	phospholipase A2, group IVA (cytosolic, calcium-dependent)	Multiple_Complex
TC1000001992.mm.1	3.42	3.07	1.27	0.0138	0.3274	Fam26d	family with sequence similarity 26, member D	Coding
TC1300001605.mm.1	4.08	3.74	1.27	0.0161	0.3358	Vmn1r-ps114	vomeronasal 1 receptor, pseudogene 114	Multiple_Complex
TC0X00001547.mm.1	3.65	3.31	1.27	0.017	0.3404	Cldn34a	claudin 34A	Coding
TC0600001650.mm.1	4.63	4.28	1.27	0.0176	0.3424	Capza3	capping protein (actin filament) muscle Z-line, alpha 3	Coding
TC0700001592.mm.1	4.67	4.33	1.27	0.0182	0.3464	Olfr483	olfactory receptor 483	Coding
TC0900001829.mm.1	5.48	5.14	1.27	0.0182	0.346	Olfr870	olfactory receptor 870; Synthetic construct Mus musculus clone IMAGE:100016260, MGC:184475 olfactory receptor 870 (Olfr870) mRNA, encodes complete protein.	Coding
TC0200001659.mm.1	3.89	3.54	1.27	0.0199	0.3512	Olfr1317	olfactory receptor 1317	Coding
TC0900003251.mm.1	4.71	4.37	1.27	0.0223	0.3598	Xirp1	xin actin-binding repeat containing 1	Coding
TC0700003951.mm.1	4.92	4.57	1.27	0.0247	0.366	Olfr655	olfactory receptor 655	Coding
TC0100000543.mm.1	6.72	6.37	1.27	0.0337	0.3871	Rpl31-ps24	ribosomal protein L31, pseudogene 24	Multiple_Complex
TC1500002262.mm.1	4.54	4.2	1.27	0.0354	0.3891	Krt82	keratin 82	Coding
TC0600002853.mm.1	10.53	10.18	1.27	0.0362	0.3914	Rybp	RING1 and YY1 binding protein	Coding
TC0200004076.mm.1	4.67	4.33	1.27	0.0378	0.3938	Olfr1264	olfactory receptor 1264	Coding
TC1600000767.mm.1	3.75	3.41	1.27	0.0393	0.397	Olfr183	olfactory receptor 183	Coding
TC0200003950.mm.1	4.31	3.96	1.27	0.0447	0.4047	Olfr1083-ps	olfactory receptor 1083, pseudogene	Multiple_Complex
TC1700001525.mm.1	4.32	3.98	1.27	0.0447	0.4047	Vmn2r94	vomeronasal 2, receptor 94	Coding
TC1900001203.mm.1	7.99	7.63	1.28	0.0022	0.2241	Psat1	phosphoserine aminotransferase 1	Multiple_Complex
TC0700001216.mm.1	3.31	2.95	1.28	0.0024	0.2304	Olfr290	olfactory receptor 290	Coding
TC0700004502.mm.1	3.96	3.61	1.28	0.0035	0.2475	Olfr536	olfactory receptor 536	Coding
TC0800000479.mm.1	3.47	3.11	1.28	0.0042	0.2572	Adam25	a disintegrin and metallopeptidase domain 25 (testase 2)	Coding
TC0200005164.mm.1	7.85	7.49	1.28	0.0059	0.2722	Sulf2	sulfatase 2	Multiple_Complex
TC1500001809.mm.1	4.49	4.13	1.28	0.0062	0.2774	Apol9a	apolipoprotein L 9a	Multiple_Complex
TC1000003123.mm.1	4.91	4.55	1.28	0.0098	0.3028	Rdh7	retinol dehydrogenase 7	Multiple_Complex
TC0700002369.mm.1	4.96	4.6	1.28	0.0152	0.3329	Bsph2	binder of sperm protein homolog 2	Multiple_Complex
TC0X00000354.mm.1	5.05	4.69	1.28	0.0277	0.3743	Rhox5	reproductive homeobox 5	Coding
TC0900002586.mm.1	4.12	3.76	1.28	0.0313	0.3825	Gcnt3	glucosaminyl (N-acetyl) transferase 3, mucin type	Multiple_Complex
TC0700002308.mm.1	3.41	3.05	1.28	0.0327	0.3851	Vmn1r66	vomeronasal 1 receptor 66	Coding
TC1600000440.mm.1	3.98	3.63	1.28	0.0344	0.3875	Tm4sf19	transmembrane 4 L six family member 19	Coding
TC0400003603.mm.1	5.18	4.82	1.28	0.0437	0.4043	Fam167b	family with sequence similarity 167, member B	Multiple_Complex
TC1600001268.mm.1	12.39	12.03	1.28	0.0499	0.4131	Rpl31-ps12	ribosomal protein L31, pseudogene 1 2	Multiple_Complex
TC0800000899.mm.1	9.21	8.84	1.29	0.0011	0.1912	Inpp4b	inositol polyphosphate-4-phosphatase, type II	Multiple_Complex
TC1000002846.mm.1	8.25	7.89	1.29	0.0021	0.2215	Nav3	neuron navigator 3	Multiple_Complex
TC0500000845.mm.1	4.29	3.93	1.29	0.0022	0.224	Cxcl15	chemokine (C-X-C motif) ligand 15	Coding
TC0200003970.mm.1	4.3	3.94	1.29	0.0026	0.2306	Olfr1109	olfactory receptor 1109	Coding
TC1000000696.mm.1	5.28	4.91	1.29	0.0028	0.2351	Pcdh15	protocadherin 15; Synthetic construct Mus musculus clone IMAGE:100069454, MGC:199356 protocadherin 15 (Pcdh15) mRNA, encodes complete protein.; protocadherin 15 (Pcdh15), transcript variant C, mRNA.	Multiple_Complex
TC0700000206.mm.1	4.04	3.68	1.29	0.0049	0.2607	Obox4-ps30	oocyte specific homeobox 4, pseudogene 30	Multiple_Complex
TC1500001836.mm.1	6.49	6.12	1.29	0.005	0.2607	Sstr3	somatostatin receptor 3	Coding
TC0300002078.mm.1	5.05	4.67	1.29	0.0055	0.2664	Vmn2r2	vomeronasal 2, receptor 2	Coding
[truncated: 18,300 more rows]

## Sheet: others
TC1200002101.mm.1	10.07	10.18	-1.08	0.241	0.6341	0610007P14Rik	RIKEN cDNA 0610007P14 gene	Multiple_Complex
TC1100002698.mm.1	8.71	8.61	1.07	0.4827	0.7946	0610009B22Rik	RIKEN cDNA 0610009B22 gene	Coding
TC1100002024.mm.1	6.52	6.33	1.14	0.0724	0.4552	0610009L18Rik	RIKEN cDNA 0610009L18 gene	Multiple_Complex
TC1800000394.mm.1	7.34	7.39	-1.03	0.5331	0.8224	0610009O20Rik	RIKEN cDNA 0610009O20 gene	Coding
TC1100002369.mm.1	9.26	9.2	1.04	0.5999	0.8557	0610010F05Rik	RIKEN cDNA 0610010F05 gene	Coding
TC1100003089.mm.1	8.23	8.15	1.06	0.7717	0.9258	0610010K14Rik; Rnasek	RIKEN cDNA 0610010K14 gene; ribonuclease, RNase K	Multiple_Complex
TC1700000394.mm.1	8.1	8.08	1.01	0.7551	0.9196	0610011F06Rik	RIKEN cDNA 0610011F06 gene	Coding
TC1600001492.mm.1	8.14	8.09	1.04	0.8827	0.964	0610012G03Rik	RIKEN cDNA 0610012G03 gene	Multiple_Complex
TC0600000848.mm.1	7.44	7.44	1	0.7304	0.9096	0610030E20Rik	RIKEN cDNA 0610030E20 gene	Multiple_Complex
TC0400001137.mm.1	8.58	8.45	1.09	0.6275	0.8682	0610037L13Rik	RIKEN cDNA 0610037L13 gene	Multiple_Complex
TC0500000584.mm.1	5.56	5.38	1.13	0.063	0.4407	0610040J01Rik	RIKEN cDNA 0610040J01 gene	Coding
TC1800000984.mm.1	4.25	4.24	1	0.6943	0.896	1010001N08Rik	RIKEN cDNA 1010001N08 gene	Multiple_Complex
TC0600000379.mm.1	4.54	4.51	1.02	0.4647	0.7838	1110001J03Rik	RIKEN cDNA 1110001J03 gene	Multiple_Complex
TC1200001344.mm.1	7.12	7.15	-1.03	0.4344	0.7673	1110002L01Rik	RIKEN cDNA 1110002L01 gene	Multiple_Complex
TC1600002059.mm.1	6.95	6.88	1.05	0.6687	0.8854	1110004E09Rik	RIKEN cDNA 1110004E09 gene	Multiple_Complex
TC0700001681.mm.1	11.89	11.97	-1.06	0.6171	0.8635	1110004F10Rik	RIKEN cDNA 1110004F10 gene	Coding
TC1300001954.mm.1	7.07	7.05	1.01	0.6796	0.89	1110007C09Rik	RIKEN cDNA 1110007C09 gene	Coding
TC0200002403.mm.1	11.41	11.37	1.03	0.9498	0.9858	1110008F13Rik	RIKEN cDNA 1110008F13 gene	Multiple_Complex
TC1200000464.mm.1	5.75	5.64	1.08	0.5566	0.8348	1110008L16Rik	RIKEN cDNA 1110008L16 gene	Multiple_Complex
TC0200003302.mm.1	6.41	6.37	1.02	0.4186	0.758	1110008P14Rik	RIKEN cDNA 1110008P14 gene	Multiple_Complex
TC0X00000627.mm.1	7.11	6.99	1.09	0.891	0.9668	1110012L19Rik	RIKEN cDNA 1110012L19 gene	Coding
TC0400002470.mm.1	4.75	4.86	-1.08	0.747	0.9159	1110017D15Rik	RIKEN cDNA 1110017D15 gene	Multiple_Complex
TC1600002027.mm.1	3.56	3.65	-1.07	0.8196	0.9425	1110025L11Rik	RIKEN cDNA 1110025L11 gene	Coding
TC0900003339.mm.1	7.64	7.78	-1.1	0.1492	0.5491	1110032A03Rik	RIKEN cDNA 1110032A03 gene	Multiple_Complex
TC0300000572.mm.1	4.4	4.38	1.02	0.9082	0.9723	1110032F04Rik	RIKEN cDNA 1110032F04 gene	Coding
TC0200002040.mm.1	5.77	5.84	-1.05	0.3154	0.6921	1110034G24Rik	RIKEN cDNA 1110034G24 gene	Multiple_Complex
TC0700000523.mm.1	4.64	4.93	-1.22	0.1859	0.5851	1110035H17Rik	RIKEN cDNA 1110035H17 gene	Multiple_Complex
TC0400000090.mm.1	8.55	8.69	-1.11	0.1095	0.506	1110037F02Rik	RIKEN cDNA 1110037F02 gene	Multiple_Complex
TC1700001933.mm.1	6.73	6.72	1	0.4128	0.7546	1110038B12Rik; Snord52	RIKEN cDNA 1110038B12 gene; small nucleolar RNA, C/D box 52	Multiple_Complex
TC1500000615.mm.1	6.38	6.26	1.08	0.5264	0.8192	1110038F14Rik	RIKEN cDNA 1110038F14 gene	Coding
TC0200004114.mm.1	7.92	8.24	-1.25	0.0047	0.2581	1110051M20Rik	RIKEN cDNA 1110051M20 gene	Multiple_Complex
TC1600000975.mm.1	4.37	4.14	1.17	0.0814	0.4684	1110057P08Rik	RIKEN cDNA 1110057P08 gene [Source:MGI Symbol;Acc:MGI:1916094]	Coding
TC1900001254.mm.1	6.24	6.26	-1.02	0.7716	0.9258	1110059E24Rik	RIKEN cDNA 1110059E24 gene	Multiple_Complex
TC0900003296.mm.1	5.52	5.38	1.1	0.6769	0.889	1110059G10Rik	RIKEN cDNA 1110059G10 gene	Multiple_Complex
TC0400003513.mm.1	6.35	6.35	1	0.9004	0.9697	1110065P20Rik	RIKEN cDNA 1110065P20 gene	Multiple_Complex
TC0900002857.mm.1	13.61	13.76	-1.11	0.0915	0.4825	1190002N15Rik	RIKEN cDNA 1190002N15 gene	Multiple_Complex
TC1300002206.mm.1	3.29	3.28	1.01	0.8685	0.9602	1190003K10Rik	RIKEN cDNA 1190003K10 gene	Coding
TC0800003248.mm.1	4.88	4.89	-1.01	0.641	0.8754	1190005I06Rik	RIKEN cDNA 1190005I06 gene	Coding
TC1000002570.mm.1	6.23	6.1	1.09	0.4392	0.7701	1190007I07Rik	RIKEN cDNA 1190007I07 gene	Coding
TC0900002968.mm.1	4.39	4.23	1.12	0.0283	0.3749	1300017J02Rik	RIKEN cDNA 1300017J02 gene	Multiple_Complex
TC0400004149.mm.1	6.01	5.85	1.12	0.8193	0.9425	1500002C15Rik; RP23-242K15.24	RIKEN cDNA 1500002C15 gene [Source:MGI Symbol;Acc:MGI:1916196]; novel protein (1500002C15Rik)	Coding
TC0700004418.mm.1	4.94	5.21	-1.21	0.0228	0.3611	1500002F19Rik	RIKEN cDNA 1500002F19 gene; PREDICTED: RIKEN cDNA 1500002F19 gene (1500002F19Rik), miscRNA.	Multiple_Complex
TC1500000746.mm.1	6.71	6.97	-1.19	0.1633	0.5634	1500009C09Rik	RIKEN cDNA 1500009C09 gene	Multiple_Complex
TC1000001011.mm.1	7.27	7.38	-1.08	0.2243	0.6181	1500009L16Rik	RIKEN cDNA 1500009L16 gene	Multiple_Complex
TC0500003734.mm.1	8.32	8.46	-1.11	0.1109	0.5074	1500011B03Rik	RIKEN cDNA 1500011B03 gene	Multiple_Complex
TC0200002580.mm.1	7.74	7.67	1.05	0.5392	0.8254	1500012F01Rik; Snord12	RIKEN cDNA 1500012F01 gene; small nucleolar RNA, C/D box 12	Multiple_Complex
TC0100000329.mm.1	8.72	9.68	-1.96	0.1096	0.5061	1500015O10Rik	RIKEN cDNA 1500015O10 gene	Coding
TC0500000225.mm.1	6.48	6.42	1.04	0.5314	0.8216	1500035N22Rik	RIKEN cDNA 1500035N22 gene	Coding
TC1700001600.mm.1	4.73	4.7	1.02	0.294	0.6764	1520401A03Rik	RIKEN cDNA 1520401A03 gene	Multiple_Complex
TC1700001621.mm.1	6.99	6.99	-1	0.9851	0.9959	1600002H07Rik	RIKEN cDNA 1600002H07 gene	Multiple_Complex
TC1000000844.mm.1	6.07	6.12	-1.03	0.7828	0.9302	1600002K03Rik	RIKEN cDNA 1600002K03 gene	Coding
TC1700000172.mm.1	4.99	5.04	-1.04	0.6135	0.8619	1600012H06Rik	RIKEN cDNA 1600012H06 gene	Multiple_Complex
TC0700000693.mm.1	5.9	5.95	-1.03	0.6939	0.8958	1600014C10Rik	RIKEN cDNA 1600014C10 gene	Multiple_Complex
TC1700002158.mm.1	4.22	4.22	-1	0.8095	0.94	1600014C23Rik	RIKEN cDNA 1600014C23 gene	Coding
TC0600000573.mm.1	3.32	3.42	-1.07	0.736	0.9116	1600015I10Rik	RIKEN cDNA 1600015I10 gene	Coding
TC0900000728.mm.1	5.32	5.28	1.03	0.2343	0.6284	1600029O15Rik	ribosomal protein L17 pseudogene; RIKEN cDNA 1600029O15 gene	Multiple_Complex
TC0500000292.mm.1	4.59	4.7	-1.08	0.7951	0.9344	1700001C02Rik	RIKEN cDNA 1700001C02 gene	Multiple_Complex
TC1700002205.mm.1	4.02	3.9	1.09	0.4121	0.7542	1700001C19Rik	RIKEN cDNA 1700001C19 gene	Multiple_Complex
TC1400001856.mm.1	4.08	3.89	1.14	0.1981	0.5964	1700001F09Rik	RIKEN cDNA 1700001F09 gene	Coding
TC0100000214.mm.1	4.45	4.29	1.12	0.1431	0.5421	1700001G17Rik	RIKEN cDNA 1700001G17 gene	Multiple_Complex
TC0500003605.mm.1	4.21	4.33	-1.09	0.9437	0.9837	1700001J03Rik	RIKEN cDNA 1700001J03 gene	Coding
TC0900000446.mm.1	4.64	4.77	-1.1	0.7328	0.9104	1700001J11Rik	ring finger protein 19A pseudogene; RIKEN cDNA 1700001J11 gene (1700001J11Rik), non-coding RNA.	Multiple_Complex
TC1200002388.mm.1	4.07	3.85	1.16	0.0407	0.4	1700001K19Rik	RIKEN cDNA 1700001K19 gene	Coding
TC1300000839.mm.1	4.41	4.63	-1.17	0.0734	0.4563	1700001L19Rik	RIKEN cDNA 1700001L19 gene	Coding
TC0200003276.mm.1	4.33	4.35	-1.02	0.8932	0.9674	1700001O22Rik	RIKEN cDNA 1700001O22 gene	Multiple_Complex
TC1100003654.mm.1	4.97	5.14	-1.12	0.8625	0.9584	1700001P01Rik	RIKEN cDNA 1700001P01 gene	Coding
TC0600000924.mm.1	4.63	4.5	1.09	0.5201	0.816	1700003E16Rik	RIKEN cDNA 1700003E16 gene	Coding
TC0X00000881.mm.1	5.18	4.89	1.22	0.073	0.4561	1700003E24Rik; BC061195	Gm5941 pseudogene; cDNA sequence BC061195 (BC061195), non-coding RNA.; RIKEN cDNA 1700003E24 gene, mRNA (cDNA clone MGC:107104 IMAGE:6775214), complete cds.; cDNA sequence BC061195	Multiple_Complex
TC0X00000879.mm.1	4.93	4.61	1.24	0.1612	0.5617	1700003E24Rik; BC061195	RIKEN cDNA 1700003E24 gene (1700003E24Rik), non-coding RNA.; cDNA sequence BC061195; Gm5941 pseudogene; RIKEN cDNA 1700003E24 gene	Multiple_Complex
TC0200002344.mm.1	5.96	5.91	1.04	0.5063	0.8079	1700003F12Rik	RIKEN cDNA 1700003F12 gene	Multiple_Complex
TC0300002888.mm.1	3.96	3.89	1.05	0.2143	0.6101	1700003H04Rik	RIKEN cDNA 1700003H04 gene	Multiple_Complex
TC0300002887.mm.1	4.02	3.96	1.04	0.3066	0.6858	1700006A11Rik	RIKEN cDNA 1700006A11 gene	Coding
TC1100001676.mm.1	3.72	3.57	1.11	0.1468	0.5465	1700006E09Rik	RIKEN cDNA 1700006E09 gene	Coding
TC0800000850.mm.1	4.09	4.02	1.05	0.476	0.7908	1700007B14Rik	RIKEN cDNA 1700007B14 gene	Coding
TC0500000949.mm.1	4.96	4.93	1.02	0.2089	0.6062	1700007G11Rik	RIKEN cDNA 1700007G11 gene	Coding
TC0700004395.mm.1	4.5	4.52	-1.01	0.7847	0.9312	1700007K09Rik	RIKEN cDNA 1700007K09 gene	Coding
TC0200003231.mm.1	6.55	6.83	-1.21	0.0223	0.3601	1700007K13Rik	RIKEN cDNA 1700007K13 gene	Multiple_Complex
TC0700004330.mm.1	5.6	5.64	-1.03	0.5676	0.8396	1700008J07Rik	RIKEN cDNA 1700008J07 gene; RIKEN cDNA 1700008J07 gene (1700008J07Rik), non-coding RNA.	Multiple_Complex
TC0700002958.mm.1	4.44	4.46	-1.01	0.8059	0.9382	1700008O03Rik	RIKEN cDNA 1700008O03 gene	Multiple_Complex
TC0300001607.mm.1	3.53	3.36	1.13	0.1658	0.5654	1700008P02Rik	RIKEN cDNA 1700008P02 gene	Coding
TC1000000771.mm.1	4.64	4.53	1.07	0.2252	0.6192	1700009J07Rik	RIKEN cDNA 1700009J07 gene	Multiple_Complex
TC0400000336.mm.1	3.62	3.68	-1.04	0.5006	0.8047	1700009N14Rik	RIKEN cDNA 1700009N14 gene	Coding
TC0200002693.mm.1	4.57	4.5	1.05	0.5785	0.845	1700010B08Rik	RIKEN cDNA 1700010B08 gene	Coding
TC0X00002670.mm.1	4.12	4.51	-1.31	0.1389	0.5378	1700010D01Rik	RIKEN cDNA 1700010D01 gene	Coding
TC0500002813.mm.1	3.87	3.63	1.18	0.0806	0.4674	1700010H22Rik	RIKEN cDNA 1700010H22 gene	Coding
TC1700000096.mm.1	5.55	5.37	1.14	0.1033	0.4988	1700010I14Rik	RIKEN cDNA 1700010I14 gene	Multiple_Complex
TC0700001191.mm.1	3.66	3.72	-1.04	0.8649	0.9591	1700010L04Rik	RIKEN cDNA 1700010L04 gene	Multiple_Complex
TC1500001074.mm.1	4.84	4.66	1.13	0.0733	0.4563	1700011A15Rik	RIKEN cDNA 1700011A15 gene	Coding
TC1700002691.mm.1	4.09	4.16	-1.04	0.8364	0.9484	1700011E24Rik	RIKEN cDNA 1700011E24 gene	Coding
TC1400001960.mm.1	3.68	3.66	1.01	0.8656	0.9593	1700011H14Rik	RIKEN cDNA 1700011H14 gene	Coding
TC1800000581.mm.1	4.81	4.88	-1.05	0.938	0.9823	1700011I03Rik	RIKEN cDNA 1700011I03 gene	Coding
TC0800002515.mm.1	3.76	3.81	-1.03	0.6444	0.8764	1700011L22Rik	RIKEN cDNA 1700011L22 gene	Coding
TC0X00001008.mm.1	4.11	3.83	1.21	0.0846	0.4721	1700011M02Rik	RIKEN cDNA 1700011M02 gene	Multiple_Complex
TC0600000301.mm.1	4.44	4.08	1.28	0.2696	0.6579	1700012A03Rik	RIKEN cDNA 1700012A03 gene	Multiple_Complex
TC1100003995.mm.1	3.98	3.89	1.06	0.2575	0.6485	1700012B07Rik	RIKEN cDNA 1700012B07 gene	Coding
TC0900001776.mm.1	4.84	4.81	1.02	0.2927	0.6755	1700012B09Rik	RIKEN cDNA 1700012B09 gene	Multiple_Complex
TC0X00000111.mm.1	4.58	4.48	1.07	0.4918	0.8001	1700012L04Rik; Gm14478	RIKEN cDNA 1700012L04 gene; predicted gene 14478	Coding
TC0400003943.mm.1	3.81	4	-1.14	0.9359	0.9819	1700012P22Rik	RIKEN cDNA 1700012P22 gene	Coding
TC0600003102.mm.1	5.49	5.25	1.18	0.075	0.4586	1700013D24Rik	RIKEN cDNA 1700013D24 gene	Coding
TC0300001147.mm.1	4.98	5.1	-1.08	0.4196	0.7586	1700013F07Rik	RIKEN cDNA 1700013F07 gene	Multiple_Complex
TC0400001707.mm.1	3.59	3.78	-1.14	0.2195	0.6142	1700013G24Rik	RIKEN cDNA 1700013G24 gene	Coding
TC0X00002245.mm.1	4.47	4.15	1.25	0.0249	0.3664	1700013H16Rik	RIKEN cDNA 1700013H16 gene	Coding
TC0100001569.mm.1	4.14	3.97	1.12	0.0833	0.4702	1700015E13Rik	RIKEN cDNA 1700015E13 gene	Coding
TC0500001908.mm.1	4.21	4.24	-1.02	0.8577	0.9567	1700015F17Rik	RIKEN cDNA 1700015F17 gene	Coding
TC0700003088.mm.1	4.02	3.94	1.06	0.2794	0.6662	1700015G11Rik	RIKEN cDNA 1700015G11 gene	Multiple_Complex
TC0100001675.mm.1	3.8	3.59	1.16	0.1848	0.5842	1700016C15Rik	RIKEN cDNA 1700016C15 gene	Coding
TC0800001703.mm.1	4.61	4.31	1.23	0.0052	0.2621	1700016D06Rik	RIKEN cDNA 1700016D06 gene	Coding
TC1600001109.mm.1	3.43	3.33	1.07	0.2295	0.624	1700016D08Rik	RIKEN cDNA 1700016D08 gene	Coding
TC0500002877.mm.1	3.62	3.59	1.02	0.4001	0.7466	1700016H13Rik	RIKEN cDNA 1700016H13 gene	Coding
TC1100001090.mm.1	7.63	7.51	1.08	0.1093	0.506	1700016K19Rik	RIKEN cDNA 1700016K19 gene	Multiple_Complex
TC0900002367.mm.1	5.28	5.03	1.19	0.1957	0.5935	1700017B05Rik	RIKEN cDNA 1700017B05 gene	Coding
TC1900001125.mm.1	3.73	3.57	1.12	0.1016	0.4969	1700017D01Rik	RIKEN cDNA 1700017D01 gene	Multiple_Complex
TC1000001226.mm.1	3.95	4.03	-1.06	0.8144	0.9415	1700017N19Rik	RIKEN cDNA 1700017N19 gene	Coding
TC1800000474.mm.1	3.94	3.64	1.23	0.0137	0.3272	1700018A14Rik	RIKEN cDNA 1700018A14 gene	Coding
TC0800003051.mm.1	5.1	4.96	1.1	0.1185	0.5148	1700018B08Rik	RIKEN cDNA 1700018B08 gene	Multiple_Complex
TC0300001929.mm.1	3.1	3.14	-1.03	0.239	0.6325	1700018B24Rik	enhancer of rudimentary homolog pseudogene; RIKEN cDNA 1700018B24 gene (1700018B24Rik), non-coding RNA.; RIKEN cDNA 1700018B24 gene	Multiple_Complex
TC0400002805.mm.1	3.47	3.76	-1.22	0.556	0.8344	1700018C11Rik	RIKEN cDNA 1700018C11 gene	Coding
TC0500001762.mm.1	3.49	3.53	-1.03	0.4694	0.7867	1700018F24Rik	RIKEN cDNA 1700018F24 gene	Coding
TC1900000430.mm.1	4.49	4.28	1.16	0.4936	0.801	1700018L02Rik	RIKEN cDNA 1700018L02 gene; RIKEN cDNA 1700018L02 gene (1700018L02Rik), non-coding RNA.	Multiple_Complex
TC0400000658.mm.1	3.73	3.67	1.04	0.7319	0.9101	1700018M17Rik	RIKEN cDNA 1700018M17 gene [Source:MGI Symbol;Acc:MGI:1919495]	Multiple_Complex
TC0100002331.mm.1	5.94	5.87	1.04	0.9321	0.9806	1700019A02Rik	RIKEN cDNA 1700019A02 gene	Coding
TC0800000008.mm.1	3.54	3.67	-1.09	0.4211	0.7598	1700019B03Rik	RIKEN cDNA 1700019B03 gene	Coding
TC0100002330.mm.1	7.93	7.74	1.14	0.3281	0.7001	1700019D03Rik	RIKEN cDNA 1700019D03 gene	Multiple_Complex
TC0600002625.mm.1	6.29	6.37	-1.06	0.3107	0.6887	1700019G17Rik	RIKEN cDNA 1700019G17 gene	Coding
TC1200002169.mm.1	4.25	3.91	1.26	0.0195	0.3501	1700019M22Rik	NFX-like protein; RIKEN cDNA 1700019M22 gene	Multiple_Complex
TC1900001724.mm.1	3.79	3.75	1.03	0.8068	0.9385	1700019N19Rik	RIKEN cDNA 1700019N19 gene	Coding
TC0100000787.mm.1	3.63	3.44	1.14	0.159	0.5599	1700019O17Rik	RIKEN cDNA 1700019O17 gene	Coding
TC0200001980.mm.1	4.04	3.95	1.07	0.2054	0.603	1700020A23Rik	RIKEN cDNA 1700020A23 gene	Coding
TC1900000972.mm.1	6.16	6.03	1.09	0.2675	0.6562	1700020D05Rik	RIKEN cDNA 1700020D05 gene; RIKEN cDNA 1700020D05 gene (1700020D05Rik), mRNA.	Coding
TC1100001251.mm.1	5.04	5.02	1.02	0.8789	0.9631	1700020L24Rik	RIKEN cDNA 1700020L24 gene	Coding
TC1000000169.mm.1	4.37	4.32	1.03	0.4768	0.7912	1700020N01Rik	RIKEN cDNA 1700020N01 gene	Multiple_Complex
TC0X00000625.mm.1	3.97	3.72	1.18	0.0234	0.3625	1700020N15Rik	RIKEN cDNA 1700020N15 gene	Coding
TC1000000167.mm.1	4.51	4.61	-1.07	0.5325	0.8219	1700021A07Rik	RIKEN cDNA 1700021A07 gene	Multiple_Complex
TC1000002086.mm.1	6.59	6.47	1.09	0.7797	0.9287	1700021F05Rik	RIKEN cDNA 1700021F05 gene	Multiple_Complex
TC0200002689.mm.1	3.4	3.41	-1.01	0.5069	0.8082	1700021F07Rik	RIKEN cDNA 1700021F07 gene	Coding
TC1900000390.mm.1	3.81	3.46	1.27	0.0224	0.3603	1700021P04Rik	RIKEN cDNA 1700021P04 gene	Multiple_Complex
TC0500000220.mm.1	4.51	4.18	1.25	0.0835	0.4704	1700022A21Rik	glycerol-3-phosphate dehydrogenase 1-like pseudogene; RIKEN cDNA 1700022A21 gene	Multiple_Complex
TC0400000427.mm.1	4.58	4.5	1.06	0.3798	0.7337	1700022I11Rik	RIKEN cDNA 1700022I11 gene	Coding
TC1100003868.mm.1	4.78	4.71	1.05	0.5586	0.8356	1700023F06Rik	RIKEN cDNA 1700023F06 gene	Multiple_Complex
TC1400000421.mm.1	4.86	4.5	1.28	0.0255	0.3688	1700024B05Rik	RIKEN cDNA 1700024B05 gene	Coding
TC1400001702.mm.1	4.76	4.54	1.17	0.3182	0.6939	1700024G13Rik	RIKEN cDNA 1700024G13 gene	Coding
TC1100002656.mm.1	3.46	3.47	-1.01	0.2386	0.6321	1700024J04Rik	RIKEN cDNA 1700024J04 gene [Source:MGI Symbol;Acc:MGI:1919098]	Multiple_Complex
TC1300002513.mm.1	3.52	3.45	1.05	0.0832	0.4702	1700024P04Rik	RIKEN cDNA 1700024P04 gene	Coding
TC0400001090.mm.1	4.42	4.37	1.04	0.3182	0.6939	1700024P16Rik	RIKEN cDNA 1700024P16 gene	Multiple_Complex
TC0200005142.mm.1	4.02	3.99	1.02	0.5572	0.835	1700025C18Rik	RIKEN cDNA 1700025C18 gene	Multiple_Complex
TC1900001126.mm.1	3.4	3.39	1.01	0.8779	0.9628	1700025F22Rik	RIKEN cDNA 1700025F22 gene	Coding
TC0100003258.mm.1	9.81	9.78	1.02	0.7036	0.8998	1700025G04Rik	RIKEN cDNA 1700025G04 gene	Multiple_Complex
TC1600000393.mm.1	4.98	4.84	1.11	0.862	0.9583	1700025H01Rik	PREDICTED: RIKEN cDNA 1700025H01 gene (1700025H01Rik), mRNA.	Multiple_Complex
TC0200003235.mm.1	4.08	4.19	-1.08	0.2825	0.6679	1700026L06Rik	RIKEN cDNA 1700026L06 gene	Multiple_Complex
TC0700002955.mm.1	5.2	5.09	1.08	0.3466	0.7108	1700028J19Rik	RIKEN cDNA 1700028J19 gene	Multiple_Complex
TC1900001267.mm.1	6.25	6.29	-1.03	0.6697	0.8858	1700028P14Rik	RIKEN cDNA 1700028P14 gene	Coding
TC1300002475.mm.1	5.82	5.89	-1.05	0.7848	0.9312	1700029F12Rik	RIKEN cDNA 1700029F12 gene; RIKEN cDNA 1700029F12 gene (1700029F12Rik), transcript variant 1, mRNA.	Multiple_Complex
TC0800001739.mm.1	4.19	4	1.14	0.1515	0.551	1700029H14Rik	RIKEN cDNA 1700029H14 gene	Coding
TC0200001412.mm.1	6.11	6.12	-1.01	0.5936	0.8528	1700029I15Rik	RIKEN cDNA 1700029I15 gene	Coding
TC0800002152.mm.1	5.56	5.54	1.01	0.6016	0.8565	1700029J07Rik	RIKEN cDNA 1700029J07 gene	Coding
TC1500000735.mm.1	5.11	4.97	1.1	0.124	0.5224	1700029P11Rik	RIKEN cDNA 1700029P11 gene	Coding
TC1200001481.mm.1	4.89	4.82	1.05	0.3739	0.7294	1700030C10Rik	RIKEN cDNA 1700030C10 gene	Multiple_Complex
TC1500002229.mm.1	3.9	3.68	1.17	0.2536	0.6452	1700030F18Rik; Fam186a	RIKEN cDNA 1700030F18 gene; family with sequence similarity 186, member A	Coding
TC0800003007.mm.1	5.07	5.04	1.02	0.5563	0.8346	1700030J22Rik	RIKEN cDNA 1700030J22 gene	Coding
TC0800000824.mm.1	5.86	6	-1.1	0.4787	0.7923	1700030K09Rik	RIKEN cDNA 1700030K09 gene	Multiple_Complex
TC0X00002760.mm.1	4.24	4.13	1.08	0.2611	0.6512	1700031F05Rik	RIKEN cDNA 1700031F05 gene	Coding
TC1800000526.mm.1	4.23	4.17	1.04	0.6744	0.8881	1700034E13Rik	RIKEN cDNA 1700034E13 gene	Coding
TC0100003820.mm.1	4.84	4.76	1.05	0.47	0.787	1700034H15Rik	RIKEN cDNA 1700034H15 gene	Multiple_Complex
TC0300001906.mm.1	6.48	6.29	1.14	0.3379	0.7054	1700034I23Rik	FUN14 domain containing 2 pseudogene; RIKEN cDNA 1700034I23 gene	Multiple_Complex
TC1200001419.mm.1	3.32	3.38	-1.04	0.3493	0.7132	1700034J04Rik	RIKEN cDNA 1700034J04 gene	Coding
TC0600003443.mm.1	3.44	3.41	1.02	0.8749	0.962	1700034J05Rik	RIKEN cDNA 1700034J05 gene	Coding
TC0600000445.mm.1	5.02	4.94	1.06	0.422	0.7601	1700034O15Rik	RIKEN cDNA 1700034O15 gene	Coding
TC0900000768.mm.1	4.66	4.38	1.21	0.0428	0.4043	1700036A12Rik	RIKEN cDNA 1700036A12 gene	Coding
TC1600001108.mm.1	4.4	4.32	1.06	0.1932	0.5911	1700037C18Rik	RIKEN cDNA 1700037C18 gene	Multiple_Complex
TC0200004649.mm.1	7.35	7.63	-1.21	0.1021	0.4972	1700037H04Rik	RIKEN cDNA 1700037H04 gene	Multiple_Complex
TC0700000838.mm.1	4.16	4.15	1.01	0.9336	0.9811	1700039E15Rik	RIKEN cDNA 1700039E15 gene	Multiple_Complex
TC0Y00000165.mm.1	4.56	4.21	1.27	0.0107	0.3085	1700040F15Rik; Gm21739	RIKEN cDNA 1700040F15 gene; predicted gene, 21739	Multiple_Complex
TC1000002330.mm.1	5.61	5.63	-1.01	0.4669	0.7853	1700040L02Rik	RIKEN cDNA 1700040L02 gene	Coding
TC1500000650.mm.1	5.8	5.6	1.15	0.5215	0.8168	1700041B01Rik	RIKEN cDNA 1700041B01 gene	Multiple_Complex
TC0800000287.mm.1	4.83	4.88	-1.04	0.5763	0.8442	1700041G16Rik	RIKEN cDNA 1700041G16 gene [Source:MGI Symbol;Acc:MGI:1920549]	Multiple_Complex
TC0400001248.mm.1	4.49	4.34	1.11	0.2998	0.6807	1700042G07Rik	RIKEN cDNA 1700042G07 gene	Coding
TC0400000398.mm.1	5.13	5.17	-1.02	0.1717	0.5708	1700045I11Rik	RIKEN cDNA 1700045I11 gene	Coding
TC1200000461.mm.1	9.98	9.99	-1.01	0.8729	0.9616	1700047I17Rik2; Fam177a	RIKEN cDNA 1700047I17 gene 2 (1700047I17Rik2), mRNA.; family with sequence similarity 177, member A (Fam177a), mRNA.; RIKEN cDNA 1700047I17 gene 2; family with sequence similarity 177, member A	Coding
TC1200000459.mm.1	8.79	8.82	-1.02	0.7454	0.9154	1700047I17Rik2; Fam177a	RIKEN cDNA 1700047I17 gene 2; family with sequence similarity 177, member A	Multiple_Complex
TC0900001632.mm.1	6.4	6.47	-1.05	0.9488	0.9854	1700048O20Rik	RIKEN cDNA 1700048O20 gene	Multiple_Complex
TC1400000420.mm.1	5.44	4.93	1.42	0.0563	0.4287	1700049E17Rik1	RIKEN cDNA 1700049E17 gene, gene 1	Coding
TC1400000418.mm.1	4.96	4.87	1.07	0.1242	0.5228	1700049E17Rik2	tandem duplication of RIKEN cDNA 1700049E17 gene, gene 2	Multiple_Complex
TC0700002680.mm.1	6.6	6.61	-1.01	0.5886	0.8499	1700049G17Rik	RIKEN cDNA 1700049G17 gene	Multiple_Complex
TC1000002363.mm.1	4.56	4.38	1.13	0.6759	0.8886	1700049L16Rik	hematological and neurological expressed 1-like pseudogene	Multiple_Complex
TC0800000990.mm.1	5.07	4.83	1.18	0.0394	0.3974	1700051O22Rik	RIKEN cDNA 1700051O22 Gene	Coding
TC1100003906.mm.1	6.1	6.36	-1.2	0.0895	0.479	1700052K11Rik	RIKEN cDNA 1700052K11 gene; RIKEN cDNA 1700052K11 gene (1700052K11Rik), non-coding RNA.	Multiple_Complex
TC0400000483.mm.1	4.68	4.99	-1.24	0.0573	0.4304	1700055D18Rik	RIKEN cDNA 1700055D18 gene	Multiple_Complex
TC0100003731.mm.1	4.11	3.85	1.19	0.2418	0.6347	1700056E22Rik	RIKEN cDNA 1700056E22 gene	Coding
TC0900001172.mm.1	4.48	4.37	1.08	0.1976	0.5958	1700057G04Rik	RIKEN cDNA 1700057G04 gene	Multiple_Complex
TC0200002424.mm.1	4.45	4.54	-1.06	0.6789	0.8897	1700060C20Rik	RIKEN cDNA 1700060C20 gene	Multiple_Complex
TC1700001019.mm.1	3.85	3.85	1	0.6798	0.8902	1700061G19Rik	RIKEN cDNA 1700061G19 gene	Multiple_Complex
TC0300002818.mm.1	3.8	3.81	-1.01	0.8577	0.9567	1700061I17Rik	RIKEN cDNA 1700061I17 gene	Multiple_Complex
TC0600001381.mm.1	4.45	4.27	1.14	0.9623	0.9894	1700063H04Rik	RIKEN cDNA 1700063H04 gene	Coding
TC0300001698.mm.1	3.87	3.62	1.19	0.0405	0.3996	1700064H15Rik	RIKEN cDNA 1700064H15 gene [Source:MGI Symbol;Acc:MGI:1920674]	Coding
TC0900002871.mm.1	3.92	3.89	1.02	0.9732	0.9926	1700065D16Rik	RIKEN cDNA 1700065D16 gene	Multiple_Complex
TC1800000316.mm.1	3.9	3.81	1.07	0.2841	0.6693	1700066B19Rik	RIKEN cDNA 1700066B19 gene	Multiple_Complex
TC1600000911.mm.1	9.37	9.13	1.18	0.1497	0.5493	1700066C05Rik	PREDICTED: RIKEN cDNA 1700066C05 gene (1700066C05Rik), mRNA.	Coding
TC0100000420.mm.1	7.21	7.25	-1.03	0.8043	0.9376	1700066M21Rik	RIKEN cDNA 1700066M21 gene	Coding
TC0800000942.mm.1	4.63	4.61	1.01	0.3085	0.6871	1700067K01Rik	RIKEN cDNA 1700067K01 gene	Multiple_Complex
TC1700000930.mm.1	3.65	3.34	1.24	0.1918	0.5902	1700067P10Rik	RIKEN cDNA 1700067P10 gene	Coding
TC0700001745.mm.1	4.33	4.34	-1.01	0.584	0.8475	1700069B07Rik	RIKEN cDNA 1700069B07 gene [Source:MGI Symbol;Acc:MGI:1923863]	Coding
TC0500003045.mm.1	4.19	4.24	-1.04	0.8571	0.9564	1700069L16Rik	RIKEN cDNA 1700069L16 gene	Multiple_Complex
TC1100003356.mm.1	5.17	5.07	1.07	0.2776	0.6646	1700071K01Rik	RIKEN cDNA 1700071K01 gene	Multiple_Complex
TC0600001718.mm.1	4.25	4.22	1.02	0.4489	0.7751	1700073E17Rik	ribosomal protein L7 pseudogene	Multiple_Complex
TC0600002147.mm.1	3.78	3.82	-1.03	0.6737	0.8878	1700074P13Rik	RIKEN cDNA 1700074P13 gene	Coding
TC0900002989.mm.1	4.52	4.32	1.15	0.0622	0.4395	1700080E11Rik	RIKEN cDNA 1700080E11 gene	Coding
TC0X00002205.mm.1	3.28	3.18	1.07	0.2543	0.646	1700080O16Rik	RIKEN cDNA 1700080O16 gene	Coding
TC0200003266.mm.1	4.25	4.05	1.14	0.7621	0.9223	1700084E18Rik	RIKEN cDNA 1700084E18 gene	Multiple_Complex
TC1500001335.mm.1	4.46	4.46	1	0.541	0.8263	1700084J12Rik	ribosomal protein L7-like 1 pseudogene; RIKEN cDNA 1700084J12 gene	Multiple_Complex
TC0X00002614.mm.1	4.08	3.55	1.44	0.1354	0.5332	1700084M14Rik	RIKEN cDNA 1700084M14 gene	Multiple_Complex
TC1100002979.mm.1	7.5	7.5	-1	0.8813	0.9637	1700086D15Rik	RIKEN cDNA 1700086D15 gene [Source:MGI Symbol;Acc:MGI:1921532]	Coding
TC1200000660.mm.1	6.09	5.91	1.14	0.0421	0.4031	1700086L19Rik	RIKEN cDNA 1700086L19 gene	Multiple_Complex
TC1500001862.mm.1	5.42	5.48	-1.04	0.9331	0.9808	1700088E04Rik	RIKEN cDNA 1700088E04 gene	Multiple_Complex
TC1400001816.mm.1	4.62	4.58	1.03	0.7171	0.9045	1700091H14Rik	RIKEN cDNA 1700091H14 gene	Multiple_Complex
TC1900000153.mm.1	5.08	4.99	1.06	0.3509	0.7141	1700092M07Rik	RIKEN cDNA 1700092M07 gene	Coding
TC1100002366.mm.1	4.07	4.09	-1.01	0.8299	0.9461	1700093K21Rik	RIKEN cDNA 1700093K21 gene	Coding
TC0200002630.mm.1	3.42	3.33	1.06	0.3927	0.742	1700101G07Rik	RIKEN cDNA 1700101G07 gene	Coding
TC0100002155.mm.1	5.6	5.5	1.07	0.2393	0.6328	1700101I19Rik	RIKEN cDNA 1700101I19 gene [Source:MGI Symbol;Acc:MGI:1920839]	Coding
TC0900001404.mm.1	5.84	5.78	1.04	0.4613	0.7822	1700102P08Rik	RIKEN cDNA 1700102P08 gene	Coding
TC0800002010.mm.1	2.71	2.7	1.01	0.4786	0.7923	1700104B16Rik	RIKEN cDNA 1700104B16 gene	Coding
TC0500000013.mm.1	8.22	8.56	-1.26	0.0531	0.4202	1700109H08Rik	RIKEN cDNA 1700109H08 gene	Multiple_Complex
TC1400000008.mm.1	5.32	5.17	1.11	0.0743	0.4577	1700110I01Rik	RIKEN cDNA 1700110I01 gene (1700110I01Rik), long non-coding RNA.; RIKEN cDNA 1700110I01 gene	Multiple_Complex
TC1400000013.mm.1	5.32	5.17	1.11	0.0743	0.4577	1700110I01Rik	RIKEN cDNA 1700110I01 gene (1700110I01Rik), long non-coding RNA.; RIKEN cDNA 1700110I01 gene	Multiple_Complex
TC1400000005.mm.1	4.95	4.8	1.11	0.1995	0.5979	1700110I01Rik	RIKEN cDNA 1700110I01 gene	Multiple_Complex
TC0600000355.mm.1	4.84	4.31	1.45	0.032	0.3838	1700111E14Rik	RIKEN cDNA 1700111E14 gene	Coding
TC1400000207.mm.1	4.61	4.59	1.01	0.7978	0.9354	1700112E06Rik	RIKEN cDNA 1700112E06 gene	Multiple_Complex
TC1000001059.mm.1	4.27	4.2	1.05	0.1582	0.559	1700113H08Rik	RIKEN cDNA 1700113H08 gene	Coding
TC1300001030.mm.1	4.4	4.36	1.03	0.5331	0.8224	1700119I11Rik; RP24-73H24.2	RIKEN cDNA 1700119I11 gene [Source:MGI Symbol;Acc:MGI:1925729]; novel protein (1700119I11Rik)	Coding
TC1000002278.mm.1	5.1	4.96	1.1	0.1052	0.5009	1700120B22Rik	RIKEN cDNA 1700120B22 gene	Coding
TC0700004333.mm.1	4.13	4.31	-1.13	0.1667	0.566	1700120K04Rik	RIKEN cDNA 1700120K04 gene; RIKEN cDNA 1700120K04 gene (1700120K04Rik), non-coding RNA.	Multiple_Complex
TC1700002221.mm.1	3.45	3.33	1.09	0.1944	0.5918	1700122O11Rik	RIKEN cDNA 1700122O11 gene	Multiple_Complex
TC1900000105.mm.1	3.72	3.68	1.03	0.3172	0.6929	1700123I01Rik	RIKEN cDNA 1700123I01 gene	Multiple_Complex
TC0500003480.mm.1	4.72	4.45	1.21	0.3316	0.7021	1700123K08Rik	RIKEN cDNA 1700123K08 gene	Coding
TC0600002792.mm.1	2.61	2.92	-1.24	0.0244	0.3655	1700123L14Rik	nucleoporin 50 pseudogene	Multiple_Complex
TC1400000757.mm.1	7.43	7.27	1.12	0.1314	0.5288	1700123O20Rik	RIKEN cDNA 1700123O20 gene	Multiple_Complex
TC1100001288.mm.1	4.53	4.32	1.16	0.1968	0.5949	1700125H20Rik	RIKEN cDNA 1700125H20 gene	Multiple_Complex
TC0900000063.mm.1	3.57	3.69	-1.08	0.8606	0.9578	1700128F08Rik	U1-snRNP binding protein homolog pseudogene	Multiple_Complex
TC1400002158.mm.1	4.06	3.91	1.11	0.2406	0.634	1700129C05Rik	RIKEN cDNA 1700129C05 gene	Coding
TC0600000418.mm.1	3.56	3.56	-1	0.8811	0.9637	1810009J06Rik	RIKEN cDNA 1810009J06 gene	Coding
TSUnmapped00000063.mm.1	3.4	3.38	1.01	0.2887	0.6722	1810009N02Rik	RIKEN cDNA 1810009N02 gene	Coding
TC1100001789.mm.1	6.42	6.29	1.09	0.1505	0.5496	1810010H24Rik	RIKEN cDNA 1810010H24 gene	Multiple_Complex
TC1400000350.mm.1	3.83	3.59	1.19	0.0643	0.4427	1810011H11Rik	RIKEN cDNA 1810011H11 gene	Coding
TC0800001891.mm.1	4.77	4.64	1.1	0.4726	0.7886	1810011O10Rik	RIKEN cDNA 1810011O10 gene	Coding
TC1600000097.mm.1	11.46	11.55	-1.07	0.1343	0.5317	1810013L24Rik	RIKEN cDNA 1810013L24 gene	Multiple_Complex
TC0300001666.mm.1	9.47	9.44	1.02	0.1523	0.5518	1810022K09Rik	RIKEN cDNA 1810022K09 gene	Coding
TC0200004549.mm.1	3.5	3.56	-1.05	0.3664	0.725	1810024B03Rik	RIKEN cDNA 1810024B03 gene	Multiple_Complex
TC0900000202.mm.1	5.68	5.73	-1.04	0.8788	0.9631	1810026J23Rik	RIKEN cDNA 1810026J23 gene	Coding
TC0X00001858.mm.1	6.89	6.87	1.02	0.4546	0.7782	1810030O07Rik	RIKEN cDNA 1810030O07 gene	Multiple_Complex
TC1100001940.mm.1	5.34	5.17	1.13	0.0678	0.4489	1810032O08Rik; Snord1b; Snord1c; Snord1a	RIKEN cDNA 1810032O08 gene; small nucleolar RNA, C/D box 1B; small nucleolar RNA, C/D box 1C; small nucleolar RNA, C/D box 1A	Multiple_Complex
TC0300001252.mm.1	6.11	6.1	1.01	0.8866	0.9653	1810037I17Rik	RIKEN cDNA 1810037I17 gene	Coding
TC1500001987.mm.1	5.95	6.05	-1.07	0.3	0.6808	1810041L15Rik	RIKEN cDNA 1810041L15 gene	Multiple_Complex
TC1000000774.mm.1	5.95	6.05	-1.08	0.3295	0.7008	1810043G02Rik	RIKEN cDNA 1810043G02 gene	Multiple_Complex
TC1100002018.mm.1	7.56	7.57	-1.01	0.5764	0.8442	1810043H04Rik	RIKEN cDNA 1810043H04 gene	Coding
TC0900002288.mm.1	3.91	3.89	1.01	0.8871	0.9655	1810046K07Rik	RIKEN cDNA 1810046K07 gene	Coding
TC1500001226.mm.1	6.8	6.57	1.17	0.2747	0.6621	1810049J17Rik	RIKEN cDNA 1810049J17 gene [Source:MGI Symbol;Acc:MGI:3704453]	Coding
TC1900000015.mm.1	6.28	6.33	-1.03	0.4017	0.7476	1810055G02Rik	RIKEN cDNA 1810055G02 gene	Coding
TC0300000268.mm.1	4.39	4.34	1.04	0.7782	0.9281	1810062G17Rik	RIKEN cDNA 1810062G17 gene	Coding
TC0900001902.mm.1	3.28	3.02	1.2	0.1718	0.571	1810064F22Rik	RIKEN cDNA 1810064F22 gene	Multiple_Complex
TC1100000690.mm.1	3.71	3.79	-1.06	0.4175	0.7576	1810065E05Rik	RIKEN cDNA 1810065E05 gene	Coding
TC1000002031.mm.1	4.6	4.58	1.01	0.9436	0.9837	2010001E11Rik	RIKEN cDNA 2010001E11 gene	Coding
TC1900000924.mm.1	4.04	4.04	-1	0.942	0.9832	2010003K11Rik	RIKEN cDNA 2010003K11 gene	Coding
TC1600000511.mm.1	4.01	3.84	1.13	0.1095	0.506	2010005H15Rik	RIKEN cDNA 2010005H15 gene	Coding
TC0900000618.mm.1	6.01	5.77	1.18	0.1553	0.5555	2010007H06Rik	RIKEN cDNA 2010007H06 gene [Source:MGI Symbol;Acc:MGI:1917099]	Multiple_Complex
TC0300002687.mm.1	3.46	3.47	-1	0.9052	0.9716	2010016I18Rik	RIKEN cDNA 2010016I18 gene	Multiple_Complex
TC0X00001127.mm.1	3.82	3.79	1.02	0.9858	0.9961	2010106E10Rik	RIKEN cDNA 2010106E10 gene	Coding
TC1200002421.mm.1	15.16	14.83	1.25	0.0093	0.3011	2010107E04Rik	RIKEN cDNA 2010107E04 gene	Coding
TC0600002058.mm.1	4.1	4.04	1.04	0.5758	0.844	2010107G12Rik	RIKEN cDNA 2010107G12 gene	Multiple_Complex
TC1000002252.mm.1	6.34	6.27	1.05	0.5722	0.842	2010107G23Rik	RIKEN cDNA 2010107G23 gene	Multiple_Complex
TC0500000895.mm.1	4.89	4.95	-1.04	0.6246	0.8669	2010109A12Rik	RIKEN cDNA 2010109A12 gene	Multiple_Complex
TC1500001725.mm.1	3.71	3.73	-1.01	0.9121	0.9739	2010109I03Rik	RIKEN cDNA 2010109I03 gene	Multiple_Complex
TSUnmapped00000049.mm.1	7.32	7.77	-1.37	0.0017	0.2108	2010111I01Rik	RIKEN cDNA 2010111I01 gene	Coding
TSUnmapped00000045.mm.1	7.9	7.51	1.31	0.1046	0.4999	2010111I01Rik	RIKEN cDNA 2010111I01 gene	Coding
TC1300000763.mm.1	7.66	7.79	-1.09	0.4655	0.7845	2010111I01Rik; Mir23b; Mir27b; Mir24-1	RIKEN cDNA 2010111I01 gene; microRNA 23b; microRNA 27b; microRNA 24-1; microRNA 24-1 (Mir24-1), microRNA.; RIKEN cDNA 2010111I01 gene (2010111I01Rik), mRNA.	Multiple_Complex
TC0100002207.mm.1	6.42	6.54	-1.09	0.1188	0.5151	2010300C02Rik	RIKEN cDNA 2010300C02 gene	Coding
TC0900003317.mm.1	7.86	7.92	-1.04	0.5787	0.845	2010315B03Rik	RIKEN cDNA 2010315B03 gene	Multiple_Complex
TC0700002719.mm.1	5.74	5.7	1.03	0.5333	0.8225	2200002D01Rik	RIKEN cDNA 2200002D01 gene	Multiple_Complex
TC0700000571.mm.1	4.43	4.29	1.1	0.149	0.5487	2200002J24Rik	RIKEN cDNA 2200002J24 gene	Coding
TC0600002150.mm.1	4.15	3.94	1.16	0.1906	0.5891	2210010C04Rik	RIKEN cDNA 2210010C04 gene	Multiple_Complex
TC0X00001564.mm.1	9.13	9.08	1.04	0.7329	0.9105	2210013O21Rik	RIKEN cDNA 2210013O21 gene	Multiple_Complex
TC1300002098.mm.1	5.43	5.47	-1.03	0.6625	0.8825	2210016F16Rik	RIKEN cDNA 2210016F16 gene	Coding
TC0500001241.mm.1	7.83	7.8	1.02	0.3316	0.7021	2210016L21Rik	RIKEN cDNA 2210016L21 gene	Multiple_Complex
TC1700001561.mm.1	6.5	6.45	1.03	0.951	0.9862	2210404O09Rik	RIKEN cDNA 2210404O09 gene	Multiple_Complex
TC1100002829.mm.1	3.87	3.78	1.07	0.3605	0.7206	2210407C18Rik	RIKEN cDNA 2210407C18 gene	Multiple_Complex
TC1300000934.mm.1	6.93	7	-1.05	0.3422	0.7085	2210408I21Rik	RIKEN cDNA 2210408I21 gene	Coding
TC0200002735.mm.1	9.86	9.89	-1.02	0.8371	0.9485	2210418O10Rik; Gm17258	RIKEN cDNA 2210418O10 gene [Source:MGI Symbol;Acc:MGI:1924208]; predicted gene, 17258 [Source:MGI Symbol;Acc:MGI:4936892]	Multiple_Complex
TC1700000695.mm.1	4.53	4.32	1.16	0.169	0.5689	2300002M23Rik	RIKEN cDNA 2300002M23 gene	Multiple_Complex
TC1100003741.mm.1	3.98	3.85	1.1	0.4608	0.7819	2300003K06Rik	RIKEN cDNA 2300003K06 gene	Multiple_Complex
TC1500001716.mm.1	4.38	4.37	1.01	0.3904	0.7405	2300005B03Rik	RIKEN cDNA 2300005B03 gene	Multiple_Complex
TC0900002477.mm.1	11.72	11.6	1.09	0.0878	0.477	2300009A05Rik	RIKEN cDNA 2300009A05 gene	Multiple_Complex
TC0200002487.mm.1	3.25	3.4	-1.11	0.0499	0.4134	2310001K24Rik	RIKEN cDNA 2310001K24 gene	Multiple_Complex
TC0400002867.mm.1	3.78	3.48	1.23	0.6276	0.8684	2310002L09Rik	RIKEN cDNA 2310002L09 gene	Multiple_Complex
TC0500000804.mm.1	3.45	3.56	-1.08	0.5873	0.8493	2310003L06Rik	RIKEN cDNA 2310003L06 gene	Coding
TC0100002830.mm.1	4.31	4.08	1.17	0.0433	0.4043	2310007B03Rik	RIKEN cDNA 2310007B03 gene	Coding
TC0100003176.mm.1	6.91	6.86	1.03	0.2144	0.6102	2310009B15Rik	RIKEN cDNA 2310009B15 gene	Multiple_Complex
TC1000002495.mm.1	7.03	7.37	-1.27	0.0185	0.3474	2310011J03Rik	RIKEN cDNA 2310011J03 gene	Coding
TC1000000673.mm.1	7.31	6.47	1.8	0.0121	0.3165	2310015B20Rik; Mrln	RIKEN cDNA 2310015B20 gene (2310015B20Rik), long non-coding RNA.; myoregulin [Source:MGI Symbol;Acc:MGI:1916813]; RIKEN cDNA 2310015B20 gene	Multiple_Complex
TC0700000812.mm.1	4.17	4.06	1.08	0.4989	0.8038	2310016G11Rik	RIKEN cDNA 2310016G11 gene	Coding
TC0700000463.mm.1	6.76	6.84	-1.06	0.3386	0.7059	2310022A10Rik	RIKEN cDNA 2310022A10 gene	Multiple_Complex
TC0800003172.mm.1	5.96	5.84	1.08	0.2964	0.6779	2310022B05Rik	RIKEN cDNA 2310022B05 gene	Coding
TC0900002276.mm.1	5	4.95	1.04	0.965	0.99	2310030G06Rik	RIKEN cDNA 2310030G06 gene	Multiple_Complex
TC1100000718.mm.1	8.53	8.4	1.1	0.7533	0.9188	2310033P09Rik	RIKEN cDNA 2310033P09 gene	Coding
TC1600000964.mm.1	4.79	4.51	1.22	0.1425	0.5411	2310034C09Rik	RIKEN cDNA 2310034C09 gene	Multiple_Complex
TC0100001008.mm.1	10.42	10.5	-1.05	0.4607	0.7819	2310035C23Rik	RIKEN cDNA 2310035C23 gene	Multiple_Complex
TC0800000976.mm.1	13.94	13.69	1.18	0.147	0.5465	2310036O22Rik	RIKEN cDNA 2310036O22 gene	Coding
TC1700000902.mm.1	5.95	6.04	-1.07	0.606	0.8587	2310039H08Rik	RIKEN cDNA 2310039H08 gene	Coding
TC0300002414.mm.1	4.03	3.76	1.21	0.0252	0.3673	2310050C09Rik	RIKEN cDNA 2310050C09 gene	Coding
TC1000001930.mm.1	4.17	3.82	1.28	0.206	0.6038	2310057J18Rik	RIKEN cDNA 2310057J18 gene	Multiple_Complex
TC0700004397.mm.1	7.79	7.98	-1.14	0.1272	0.5247	2310057M21Rik	RIKEN cDNA 2310057M21 gene	Coding
TC1600002013.mm.1	3.75	3.82	-1.05	0.1593	0.5599	2310057N15Rik	RIKEN cDNA 2310057N15 gene	Coding
TC1700001985.mm.1	9.27	9.07	1.14	0.2261	0.6203	2310061I04Rik	RIKEN cDNA 2310061I04 gene	Multiple_Complex
TC1600002011.mm.1	4.49	4.17	1.24	0.021	0.3556	2310061N02Rik	RIKEN cDNA 2310061N02 gene	Coding
TC1500002231.mm.1	4.77	4.63	1.1	0.312	0.6898	2310068J16Rik	RIKEN cDNA 2310068J16 gene; RIKEN cDNA 2310068J16 gene (2310068J16Rik), non-coding RNA.	Multiple_Complex
TC1600002008.mm.1	4.06	4.11	-1.03	0.8836	0.9645	2310079G19Rik	RIKEN cDNA 2310079G19 gene	Coding
TC1300001979.mm.1	3.84	3.68	1.12	0.5628	0.8375	2310081J21Rik	RIKEN cDNA 2310081J21 gene (2310081J21Rik), long non-coding RNA.; RIKEN cDNA 2310081J21 gene	Multiple_Complex
TC1300000584.mm.1	3.98	3.81	1.12	0.6976	0.8974	2310081J21Rik	RIKEN cDNA 2310081J21 gene; RIKEN cDNA 2310081J21 gene (2310081J21Rik), non-coding RNA.	Multiple_Complex
TC0700000798.mm.1	6.67	6.54	1.09	0.3225	0.6966	2410002F23Rik; Snord88a	RIKEN cDNA 2410002F23 gene; small nucleolar RNA, C/D box 88A	Multiple_Complex
TC0300001485.mm.1	6.91	6.86	1.03	0.327	0.6994	2410004B18Rik	RIKEN cDNA 2410004B18 gene	Multiple_Complex
TC1200001465.mm.1	4.25	4.27	-1.01	0.5731	0.8425	2410004P03Rik	RIKEN cDNA 2410004P03 gene	Multiple_Complex
TC1700002332.mm.1	9.63	9.56	1.05	0.4008	0.7472	2410015M20Rik	RIKEN cDNA 2410015M20 gene	Coding
TC1200000796.mm.1	6.47	6.38	1.06	0.4378	0.7693	2410016O06Rik	RIKEN cDNA 2410016O06 gene	Coding
TC1700000722.mm.1	3.87	3.96	-1.07	0.7078	0.9014	2410017I17Rik	RIKEN cDNA 2410017I17 gene	Multiple_Complex
TC1400000812.mm.1	5.92	5.92	-1	0.4775	0.7919	2410022M11Rik	PREDICTED: RIKEN cDNA 2410022M11 gene (2410022M11Rik), miscRNA.; RIKEN cDNA 2410022M11 gene	Multiple_Complex
TC0300002623.mm.1	2.93	3.19	-1.19	0.0988	0.4925	2410024N13Rik	RIKEN cDNA 2410024N13 gene [Source:MGI Symbol;Acc:MGI:1917250]	Multiple_Complex
TC1500000054.mm.1	9.82	9.91	-1.06	0.2209	0.6153	2410089E03Rik	RIKEN cDNA 2410089E03 gene	Multiple_Complex
TC1600001028.mm.1	5.91	6.27	-1.28	0.0071	0.2854	2410124H12Rik	RIKEN cDNA 2410124H12 gene	Multiple_Complex
TC0500001308.mm.1	7.18	7.27	-1.07	0.5527	0.8325	2410131K14Rik	RIKEN cDNA 2410131K14 gene	Coding
TC1700002045.mm.1	3.92	3.7	1.16	0.4463	0.7737	2410137M14Rik	RIKEN cDNA 2410137M14 gene	Coding
TSUnmapped00000017.mm.1	3.9	4.04	-1.11	0.2083	0.6055	2410141K09Rik	RIKEN cDNA 2410141K09 gene	Coding
TC1300002770.mm.1	5.01	4.89	1.09	0.274	0.6613	2410141K09Rik	RIKEN cDNA 2410141K09 gene	Multiple_Complex
TC1600000252.mm.1	8.76	8.71	1.04	0.5401	0.8257	2510002D24Rik	RIKEN cDNA 2510002D24 gene; Synthetic construct Mus musculus clone IMAGE:100063916, MGC:193383 RIKEN cDNA 2510002D24 gene (2510002D24Rik) mRNA, encodes complete protein.	Multiple_Complex
TC1600001366.mm.1	9.36	9.23	1.09	0.3293	0.7007	2510009E07Rik	RIKEN cDNA 2510009E07 gene	Multiple_Complex
TC0400001920.mm.1	7.78	7.79	-1.01	0.7395	0.9128	2510039O18Rik	RIKEN cDNA 2510039O18 gene	Multiple_Complex
TC0700004290.mm.1	4.94	4.73	1.16	0.1444	0.5433	2510046G10Rik	RIKEN cDNA 2510046G10 gene [Source:MGI Symbol;Acc:MGI:3698051]	Coding
TC0200003256.mm.1	4.92	4.73	1.14	0.4086	0.7516	2600006K01Rik	RIKEN cDNA 2600006K01 gene	Coding
TC0600001879.mm.1	7.81	7.66	1.11	0.1883	0.588	2610001J05Rik	RIKEN cDNA 2610001J05 gene	Multiple_Complex
TC0X00002847.mm.1	9	9.02	-1.01	0.39	0.7402	2610002M06Rik	RIKEN cDNA 2610002M06 gene	Multiple_Complex
TC0800003241.mm.1	12.4	12.48	-1.06	0.1842	0.5834	2610005L07Rik	cadherin 11 pseudogene	Multiple_Complex
TC1000002464.mm.1	9.77	9.86	-1.06	0.1822	0.5813	2610008E11Rik	RIKEN cDNA 2610008E11 gene	Multiple_Complex
TC0700001716.mm.1	5.09	5.07	1.01	0.8047	0.9377	2610020H08Rik	RIKEN cDNA 2610020H08 gene	Multiple_Complex
TC0700000732.mm.1	9.93	9.97	-1.03	0.3169	0.6929	2610021A01Rik	RIKEN cDNA 2610021A01 gene	Coding
TC1100000206.mm.1	7.08	7.08	1	0.8604	0.9577	2610024D14Rik	RIKEN cDNA 2610024D14 gene [Source:MGI Symbol;Acc:MGI:1917660]	Multiple_Complex
TC1000000742.mm.1	4.8	4.65	1.11	0.1266	0.5244	2610028H24Rik	RIKEN cDNA 2610028H24 gene	Coding
TC1400002790.mm.1	7.99	7.66	1.26	0.0252	0.3673	2610042L04Rik	RIKEN cDNA 2610042L04 gene	Coding
TC0800003217.mm.1	8.72	8.83	-1.08	0.9686	0.991	2610044O15Rik8	RIKEN cDNA 2610044O15 gene	Coding
TC0100001942.mm.1	4.14	3.97	1.12	0.0325	0.3845	2610203C22Rik	RIKEN cDNA 2610203C22 gene	Multiple_Complex
TC0400000078.mm.1	6.63	6.68	-1.04	0.5652	0.8384	2610301B20Rik	RIKEN cDNA 2610301B20 gene	Multiple_Complex
TC0900002905.mm.1	3.38	3.19	1.14	0.3975	0.7449	2610303G11Rik	RIKEN cDNA 2610303G11 gene [Source:MGI Symbol;Acc:MGI:1917707]	Coding
TC0400003992.mm.1	6.69	6.79	-1.07	0.4572	0.7798	2610305D13Rik	RIKEN cDNA 2610305D13 gene	Multiple_Complex
TC0600002646.mm.1	5.8	5.57	1.17	0.0247	0.366	2610306M01Rik	RIKEN cDNA 2610306M01 gene; RIKEN cDNA 2610306M01 gene (2610306M01Rik), non-coding RNA.	Multiple_Complex
TC1600001277.mm.1	4.04	4.15	-1.08	0.1537	0.5535	2610318N02Rik	RIKEN cDNA 2610318N02 gene	Coding
TC1100001153.mm.1	10.97	11.07	-1.07	0.1266	0.5244	2610507B11Rik	RIKEN cDNA 2610507B11 gene	Multiple_Complex
TC0500003735.mm.1	8.14	8.15	-1.01	0.9985	0.9994	2610524H06Rik	RIKEN cDNA 2610524H06 gene	Coding
TC1400001746.mm.1	5	4.78	1.16	0.2963	0.6778	2610528A11Rik	RIKEN cDNA 2610528A11 gene	Multiple_Complex
TC0400001309.mm.1	4.31	4.35	-1.02	0.4944	0.8018	2610528J11Rik	RIKEN cDNA 2610528J11 gene	Coding
TC0800000648.mm.1	9.16	9.26	-1.07	0.2298	0.6243	2700029M09Rik	RIKEN cDNA 2700029M09 gene	Multiple_Complex
TC1800001445.mm.1	4.86	4.75	1.08	0.2782	0.6651	2700046A07Rik	RIKEN cDNA 2700046A07 gene	Multiple_Complex
TC1200000606.mm.1	8.24	8.22	1.01	0.5637	0.8379	2700049A03Rik	RIKEN cDNA 2700049A03 gene	Coding
TC1400001523.mm.1	12.49	12.45	1.03	0.9596	0.9887	2700060E02Rik	RIKEN cDNA 2700060E02 gene	Coding
TC1800000197.mm.1	8.62	8.65	-1.02	0.7526	0.9185	2700062C07Rik	RIKEN cDNA 2700062C07 gene	Multiple_Complex
TC1900000137.mm.1	5.78	5.68	1.07	0.1458	0.5453	2700081O15Rik	RIKEN cDNA 2700081O15 gene	Multiple_Complex
TC0200003872.mm.1	6.02	5.93	1.06	0.7111	0.9019	2700094K13Rik	RIKEN cDNA 2700094K13 gene	Multiple_Complex
TC1200001759.mm.1	7.3	7.38	-1.06	0.089	0.4786	2700097O09Rik	RIKEN cDNA 2700097O09 gene	Multiple_Complex
TC1700001341.mm.1	4.33	4.15	1.13	0.1872	0.5868	2700099C18Rik	NDC80 homolog, kinetochore complex component pseudogene	Multiple_Complex
TC0800003176.mm.1	7.01	6.92	1.06	0.3475	0.7115	2810004N23Rik	RIKEN cDNA 2810004N23 gene	Multiple_Complex
TC0500001442.mm.1	4.69	4.89	-1.15	0.2457	0.638	2810006K23Rik	RIKEN cDNA 2810006K23 gene	Coding
TC1100000708.mm.1	5.79	5.9	-1.08	0.4898	0.799	2810021J22Rik	RIKEN cDNA 2810021J22 gene	Coding
TC0100001431.mm.1	7.26	7.31	-1.04	0.7794	0.9286	2810025M15Rik	RIKEN cDNA 2810025M15 gene	Multiple_Complex
TC1200000042.mm.1	5.72	5.86	-1.1	0.7724	0.926	2810032G03Rik	RIKEN cDNA 2810032G03 gene	Multiple_Complex
TC1500000559.mm.1	5.21	5.16	1.04	0.4748	0.7901	2810039B14Rik	PREDICTED: RIKEN cDNA 2810039B14 gene (2810039B14Rik), miscRNA.	Multiple_Complex
TC0700002251.mm.1	5.87	5.99	-1.09	0.6233	0.8662	2810047C21Rik1	RIKEN cDNA 2810047C21 gene 1	Multiple_Complex
TC0300000733.mm.1	9.75	9.86	-1.08	0.5056	0.8075	2810403A07Rik	RIKEN cDNA 2810403A07 gene	Multiple_Complex
TC1600000959.mm.1	4.23	4.05	1.13	0.1806	0.5801	2810407A14Rik	RIKEN cDNA 2810407A14 gene	Multiple_Complex
TC1100003075.mm.1	4.74	4.61	1.09	0.1358	0.5334	2810408A11Rik	RIKEN cDNA 2810408A11 gene	Multiple_Complex
TC0900000854.mm.1	4.82	4.69	1.09	0.2984	0.6796	2810417H13Rik	RIKEN cDNA 2810417H13 gene	Multiple_Complex
TC0800002395.mm.1	7.64	7.57	1.05	0.2702	0.6583	2810428I15Rik	RIKEN cDNA 2810428I15 gene	Multiple_Complex
TC0100000778.mm.1	6.04	5.97	1.05	0.8938	0.9677	2810459M11Rik	RIKEN cDNA 2810459M11 gene	Coding
TC0600001769.mm.1	8.19	8.18	1.01	0.6501	0.8786	2810474O19Rik	RIKEN cDNA 2810474O19 gene	Multiple_Complex
TC1600000171.mm.1	10.05	10.21	-1.11	0.1362	0.534	2900011O08Rik	RIKEN cDNA 2900011O08 gene	Coding
TC0500003027.mm.1	4.65	4.7	-1.03	0.3183	0.694	2900026A02Rik	RIKEN cDNA 2900026A02 gene	Multiple_Complex
TC1800000417.mm.1	5.7	6	-1.23	0.0109	0.3106	2900055J20Rik	RIKEN cDNA 2900055J20 gene	Multiple_Complex
TC0100002938.mm.1	6.31	6.14	1.12	0.2096	0.607	2900060B14Rik	RIKEN cDNA 2900060B14 gene	Multiple_Complex
TC0700000140.mm.1	3.75	3.79	-1.03	0.5814	0.8458	2900092C05Rik	RIKEN cDNA 2900092C05 gene	Coding
TC0200004989.mm.1	13.59	14.14	-1.46	0.002	0.22	2900097C17Rik	RIKEN cDNA 2900097C17 gene	Multiple_Complex
TC0900003097.mm.1	6.63	6.62	1	0.8039	0.9375	3000002C10Rik	glyceraldehyde-3-phosphate dehydrogenase pseudogene	Multiple_Complex
TC1100000537.mm.1	6.33	6.37	-1.03	0.6384	0.8742	3010026O09Rik	RIKEN cDNA 3010026O09 gene	Multiple_Complex
TC0400003504.mm.1	3.81	3.76	1.04	0.6846	0.8921	3100002H09Rik	RIKEN cDNA 3100002H09 gene [Source:MGI Symbol;Acc:MGI:1917499]	Coding
TC1800000100.mm.1	7.87	7.91	-1.03	0.511	0.8109	3110002H16Rik	RIKEN cDNA 3110002H16 gene	Multiple_Complex
TC0100001085.mm.1	5.53	5.62	-1.06	0.2612	0.6513	3110009E18Rik	RIKEN cDNA 3110009E18 gene	Multiple_Complex
TC1200001098.mm.1	3.94	3.85	1.06	0.8006	0.9362	3110018I06Rik	RIKEN cDNA 3110018I06 gene	Coding
TC0600001338.mm.1	4.89	4.72	1.13	0.5128	0.812	3110021A11Rik	RIKEN cDNA 3110021A11 gene	Multiple_Complex
TC0400001153.mm.1	7.44	7.45	-1.01	0.6664	0.8841	3110021N24Rik	RIKEN cDNA 3110021N24 gene	Multiple_Complex
TC0100000041.mm.1	5.31	5	1.24	0.1569	0.5576	3110035E14Rik	RIKEN cDNA 3110035E14 gene	Coding
TC1200002520.mm.1	4.29	4.14	1.11	0.1499	0.5493	3110039M20Rik	RIKEN cDNA 3110039M20 gene	Multiple_Complex
TC0100001349.mm.1	4.55	4.5	1.03	0.24	0.6335	3110040M04Rik	PREDICTED: RIKEN cDNA 3110040M04 gene (3110040M04Rik), mRNA.	Coding
TC0700003617.mm.1	6.8	6.83	-1.02	0.6752	0.8885	3110040N11Rik	RIKEN cDNA 3110040N11 gene	Multiple_Complex
TC0400002403.mm.1	7.37	7.48	-1.09	0.3125	0.6901	3110043O21Rik	RIKEN cDNA 3110043O21 gene	Multiple_Complex
TC1700000276.mm.1	7.42	7.4	1.02	0.6509	0.879	3110052M02Rik	RIKEN cDNA 3110052M02 gene; RIKEN cDNA 3110052M02 gene (3110052M02Rik), mRNA.	Multiple_Complex
TC1200001482.mm.1	5.98	6	-1.01	0.4481	0.7745	3110053B16Rik	RIKEN cDNA 3110053B16 gene	Multiple_Complex
TC0300000309.mm.1	7.92	8.01	-1.07	0.3322	0.7023	3110057O12Rik; Gm2011	RIKEN cDNA 3110057O12 gene; predicted gene 2011; predicted gene 2011 (Gm2011), non-coding RNA.	Multiple_Complex
TC0600002055.mm.1	4.97	4.83	1.1	0.3733	0.7291	3110062M04Rik	RIKEN cDNA 3110062M04 gene	Multiple_Complex
TC1300002744.mm.1	5.15	5.13	1.01	0.3443	0.7096	3110070M22Rik	RIKEN cDNA 3110070M22 gene	Multiple_Complex
TC0100000816.mm.1	3.94	3.85	1.06	0.6814	0.8907	3110079O15Rik	RIKEN cDNA 3110079O15 gene	Coding
TC0500003490.mm.1	7.45	7.24	1.16	0.0581	0.4314	3110082I17Rik	RIKEN cDNA 3110082I17 gene	Coding
TC0500002153.mm.1	6.04	5.96	1.05	0.9018	0.9704	3110082J24Rik	RIKEN cDNA 3110082J24 gene	Coding
TC1800000380.mm.1	6.64	6.74	-1.07	0.928	0.979	3222401L13Rik	RIKEN cDNA 3222401L13 gene	Multiple_Complex
TC0200004833.mm.1	7.39	7.5	-1.08	0.159	0.5599	3300002I08Rik	RIKEN cDNA 3300002I08 gene	Multiple_Complex
TC1400001708.mm.1	4.21	4.13	1.06	0.6479	0.8774	3425401B19Rik	RIKEN cDNA 3425401B19 gene	Coding
TC1400001965.mm.1	10.46	11.02	-1.47	0.0002	0.1265	3632451O06Rik	RIKEN cDNA 3632451O06 gene	Multiple_Complex
TC0X00000512.mm.1	5.13	5.17	-1.02	0.7716	0.9258	3830403N18Rik	RIKEN cDNA 3830403N18 gene	Coding
TC1400000100.mm.1	8.02	8.04	-1.01	0.537	0.8243	3830406C13Rik	RIKEN cDNA 3830406C13 gene; RIKEN cDNA 3830406C13 gene (3830406C13Rik), transcript variant 2, mRNA.	Multiple_Complex
TC1300001191.mm.1	5.44	5.33	1.08	0.4913	0.7998	3830408C21Rik	RIKEN cDNA 3830408C21 gene	Multiple_Complex
TC0X00000582.mm.1	3.34	3.27	1.05	0.4596	0.7812	3830417A13Rik	RIKEN cDNA 3830417A13 gene	Coding
TC0800001692.mm.1	3.67	3.79	-1.08	0.7382	0.9124	3930402G23Rik	RIKEN cDNA 3930402G23 gene	Multiple_Complex
TC1900001771.mm.1	4.3	4.34	-1.03	0.8171	0.9417	4430402I18Rik	RIKEN cDNA 4430402I18 gene	Coding
TC1900001772.mm.1	5.75	5.71	1.03	0.6744	0.8882	4430402I18Rik	RIKEN cDNA 4430402I18 gene	Multiple_Complex
TC0300002356.mm.1	8.02	8.09	-1.05	0.8733	0.9617	4632404H12Rik	RIKEN cDNA 4632404H12 gene [Source:MGI Symbol;Acc:MGI:1921284]	Multiple_Complex
TC0300000134.mm.1	8.12	8.09	1.02	0.8814	0.9637	4632415L05Rik	RRS1 ribosome biogenesis regulator homolog pseudogene	Multiple_Complex
TC0700000053.mm.1	6.03	5.75	1.21	0.2902	0.6738	4632433K11Rik	RIKEN cDNA 4632433K11 gene	Coding
TC0500003426.mm.1	4.26	4.31	-1.03	0.9749	0.9932	4731417B20Rik	RIKEN cDNA 4731417B20 gene	Coding
TC0100001923.mm.1	4.75	4.68	1.05	0.8926	0.9673	4732440D04Rik	RIKEN cDNA 4732440D04 gene [Source:MGI Symbol;Acc:MGI:3604103]	Coding
TC1500002263.mm.1	4.17	4	1.12	0.0733	0.4563	4732456N10Rik	RIKEN cDNA 4732456N10 gene	Coding
TC1000001167.mm.1	3.83	3.72	1.08	0.2005	0.5991	4732465J04Rik	RIKEN cDNA 4732465J04 gene	Multiple_Complex
TC0700000414.mm.1	6.31	6.22	1.07	0.1687	0.5686	4732471J01Rik	RIKEN cDNA 4732471J01 gene	Multiple_Complex
TC1700000540.mm.1	3.32	3.34	-1.01	0.9287	0.9794	4833413E03Rik; RP23-106N22.1	RIKEN cDNA 4833413E03 gene [Source:MGI Symbol;Acc:MGI:1925354]; novel protein (4833413E03Rik)	Coding
TC0700001181.mm.1	4.26	4.21	1.03	0.4511	0.7766	4833418N17Rik	RIKEN cDNA 4833418N17 gene [Source:MGI Symbol;Acc:MGI:1921157]	Multiple_Complex
TC1300001348.mm.1	9.83	9.99	-1.12	0.2623	0.6522	4833420G17Rik	RIKEN cDNA 4833420G17 gene	Multiple_Complex
TC0200003897.mm.1	3.96	3.75	1.15	0.0639	0.442	4833423E24Rik	RIKEN cDNA 4833423E24 gene	Multiple_Complex
TC0900002284.mm.1	4.07	4.18	-1.08	0.6889	0.8938	4833427G06Rik	RIKEN cDNA 4833427G06 gene	Coding
TC1300002034.mm.1	12.14	12.28	-1.1	0.0643	0.4427	4833439L19Rik	RIKEN cDNA 4833439L19 gene	Multiple_Complex
TC1700001861.mm.1	3.79	3.5	1.22	0.0888	0.4784	4921501E09Rik	RIKEN cDNA 4921501E09 gene	Coding
TC0200003063.mm.1	4.36	4.04	1.25	0.0266	0.3725	4921504E06Rik	RIKEN cDNA 4921504E06 gene	Multiple_Complex
TC0600002254.mm.1	7.15	6.96	1.14	0.3083	0.6869	4921507P07Rik	RIKEN cDNA 4921507P07 gene	Coding
TC1200001632.mm.1	5.38	5.39	-1.01	0.7184	0.9047	4921508M14Rik	RIKEN cDNA 4921508M14 gene [Source:MGI Symbol;Acc:MGI:1918094]	Coding
TC0200004875.mm.1	4.19	4.4	-1.16	0.2316	0.6261	4921509C19Rik	RIKEN cDNA 4921509C19 gene	Coding
TC0X00001246.mm.1	3.47	3.47	1.01	0.3389	0.7061	4921511C20Rik	high density lipoprotein (HDL) binding protein pseudogene	Multiple_Complex
TC0500000040.mm.1	3.89	3.83	1.05	0.6105	0.8607	4921511H03Rik	RIKEN cDNA 4921511H03 gene	Coding
TC0X00003211.mm.1	2.86	2.85	1.01	0.5471	0.8294	4921511M17Rik; Gm10057; Gm15140; Samt1	RIKEN cDNA 4921511M17 gene (4921511M17Rik), mRNA.; predicted gene 10057; predicted gene 15140; spermatogenesis associated multipass transmembrane protein 1 (Samt1), mRNA.; spermatogenesis associated multipass transmembrane protein 1	Coding
TC0X00003212.mm.1	2.86	2.85	1.01	0.5471	0.8294	4921511M17Rik; Gm10057; Gm15140; Samt1	RIKEN cDNA 4921511M17 gene; predicted gene 10057 (Gm10057), mRNA.; predicted gene 15140 (Gm15140), mRNA.; spermatogenesis associated multipass transmembrane protein 1 (Samt1), mRNA.; predicted gene 10057	Coding
TC0X00003213.mm.1	2.81	2.93	-1.09	0.703	0.8997	4921511M17Rik; Gm10057; Samt1	RIKEN cDNA 4921511M17 gene (4921511M17Rik), mRNA.; predicted gene 10057 (Gm10057), mRNA.; spermatogenesis associated multipass transmembrane protein 1 (Samt1), mRNA.; predicted gene 10057	Coding
TC0X00003216.mm.1	3.01	3.31	-1.23	0.5909	0.8513	4921511M17Rik; Gm15140; Samt1	RIKEN cDNA 4921511M17 gene (4921511M17Rik), mRNA.; predicted gene 15140 (Gm15140), mRNA.; spermatogenesis associated multipass transmembrane protein 1; predicted gene 15140	Coding
TC1700001200.mm.1	4.7	4.77	-1.05	0.5361	0.824	4921513D11Rik; LOC100502965	RIKEN cDNA 4921513D11 gene [Source:MGI Symbol;Acc:MGI:1918173]; PREDICTED: uncharacterized LOC100502965 (LOC100502965), mRNA.	Coding
TC1000001485.mm.1	4.49	4.17	1.25	0.0272	0.3731	4921513I03Rik	RIKEN cDNA 4921513I03 gene	Multiple_Complex
TC0400001779.mm.1	6.48	6.47	1.01	0.9289	0.9794	4921514A10Rik	RIKEN cDNA 4921514A10 gene [Source:MGI Symbol;Acc:MGI:3704238]	Coding
TC1300002120.mm.1	4.22	4.21	1.01	0.3722	0.7284	4921517D22Rik	RIKEN cDNA 4921517D22 gene	Coding
TC0800000062.mm.1	4.33	4.53	-1.15	0.5931	0.8526	4921522P10Rik	RIKEN cDNA 4921522P10 gene	Coding
TC0800002612.mm.1	9.44	9.39	1.04	0.2453	0.6376	4921524J17Rik	RIKEN cDNA 4921524J17 gene	Multiple_Complex
TC1800000046.mm.1	4.06	4.13	-1.05	0.7401	0.9129	4921524L21Rik	RIKEN cDNA 4921524L21 gene	Coding
TC0900003165.mm.1	3.83	3.69	1.1	0.1463	0.5458	4921528I07Rik	RIKEN cDNA 4921528I07 gene	Coding
TC1400001143.mm.1	3.88	3.84	1.03	0.6599	0.8818	4921530L21Rik	RIKEN cDNA 4921530L21 gene	Coding
TC1100002100.mm.1	4.21	4.19	1.01	0.8212	0.9429	4921536K21Rik	RIKEN cDNA 4921536K21 gene; RIKEN cDNA 4921536K21 gene (4921536K21Rik), mRNA.	Multiple_Complex
TC0400003174.mm.1	4.01	4.21	-1.14	0.1366	0.5343	4921539E11Rik	RIKEN cDNA 4921539E11 gene	Coding
TC0800002897.mm.1	6.25	6.25	1	0.8131	0.9411	4922502B01Rik	RIKEN cDNA 4922502B01 gene	Coding
TC0800002898.mm.1	5.99	5.8	1.14	0.9568	0.9879	4922502B01Rik	RIKEN cDNA 4922502B01 gene	Coding
TC0600003230.mm.1	4.15	3.99	1.12	0.1604	0.5608	4922502D21Rik	RIKEN cDNA 4922502D21 gene	Coding
TC0200003364.mm.1	3.5	3.22	1.21	0.0492	0.4114	4930402F06Rik	RIKEN cDNA 4930402F06 gene	Coding
TC0200005505.mm.1	10.01	9.94	1.05	0.5038	0.8065	4930402H24Rik; Gm14057	RIKEN cDNA 4930402H24 gene; Ppp1r14c pseudogene	Multiple_Complex
TC0X00000106.mm.1	3.75	3.49	1.2	0.4852	0.7959	4930402K13Rik	RIKEN cDNA 4930402K13 gene	Coding
TC1000001833.mm.1	5.14	5.01	1.09	0.4708	0.7876	4930403O15Rik; Gm17229; RP23-269H11.1	RIKEN cDNA 4930403O15 gene [Source:MGI Symbol;Acc:MGI:1921064]; predicted gene 17229 [Source:MGI Symbol;Acc:MGI:4938056]; novel transcript	Multiple_Complex
TC0200002317.mm.1	5.32	5.33	-1.01	0.8741	0.9618	4930404H24Rik	RIKEN cDNA 4930404H24 gene [Source:MGI Symbol;Acc:MGI:1925401]	Coding
TC1000002539.mm.1	4.26	4.34	-1.06	0.5174	0.8145	4930404N11Rik	RIKEN cDNA 4930404N11 gene	Multiple_Complex
TC1500000738.mm.1	3.31	3.32	-1.01	0.8623	0.9583	4930407I10Rik	RIKEN cDNA 4930407I10 gene	Coding
TC1200001050.mm.1	3.54	3.95	-1.33	0.0662	0.447	4930408O17Rik	RIKEN cDNA 4930408O17 gene [Source:MGI Symbol;Acc:MGI:1921178]	Coding
TC0200000079.mm.1	4.63	4.57	1.04	0.4694	0.7867	4930412O13Rik	RIKEN cDNA 4930412O13 gene	Multiple_Complex
TC1100000130.mm.1	4.41	4.35	1.04	0.7948	0.9343	4930415F15Rik	RIKEN cDNA 4930415F15 gene	Multiple_Complex
TC1100003730.mm.1	4.31	4.14	1.12	0.1843	0.5835	4930415H17Rik	RIKEN cDNA 4930415H17 gene [Source:MGI Symbol;Acc:MGI:1921101]	Multiple_Complex
TC0X00002604.mm.1	4.07	3.96	1.08	0.4253	0.7616	4930415L06Rik	RIKEN cDNA 4930415L06 gene	Coding
TC1500000980.mm.1	5.1	5.05	1.03	0.8317	0.9468	4930415O20Rik	RIKEN cDNA 4930415O20 gene	Coding
TC0500000442.mm.1	3.41	3.34	1.05	0.9844	0.9956	4930421P07Rik	RIKEN cDNA 4930421P07 gene [Source:MGI Symbol;Acc:MGI:1921025]	Multiple_Complex
TC1600001879.mm.1	11.69	11.64	1.04	0.3747	0.73	4930423O20Rik	RIKEN cDNA 4930423O20 gene	Coding
TC0200002021.mm.1	3.82	3.71	1.08	0.9304	0.98	4930425F17Rik	RIKEN cDNA 4930425F17 gene	Coding
TC1800000169.mm.1	4.6	4.49	1.08	0.4488	0.7751	4930426D05Rik	RIKEN cDNA 4930426D05 gene	Multiple_Complex
TC0200000306.mm.1	4.74	4.77	-1.02	0.2405	0.6338	4930426L09Rik	RIKEN cDNA 4930426L09 gene	Multiple_Complex
TC1200001283.mm.1	4.66	4.67	-1.01	0.6144	0.8625	4930427A07Rik	RIKEN cDNA 4930427A07 gene	Coding
TC0300000220.mm.1	6.74	7.02	-1.22	0.0794	0.4658	4930429B21Rik	RIKEN cDNA 4930429B21 gene	Multiple_Complex
TC0200004317.mm.1	4.31	4.27	1.03	0.271	0.6591	4930430A15Rik	RIKEN cDNA 4930430A15 gene	Coding
TC1000002776.mm.1	9	8.92	1.06	0.6075	0.8592	4930430F08Rik	RIKEN cDNA 4930430F08 gene	Multiple_Complex
TC0500003100.mm.1	4.47	4.25	1.17	0.1264	0.5243	4930430O22Rik	RIKEN cDNA 4930430O22 gene	Coding
TC0500000483.mm.1	4.8	4.55	1.19	0.1144	0.5103	4930431F12Rik	RIKEN cDNA 4930431F12 gene	Multiple_Complex
TC0700000531.mm.1	4.24	4.12	1.09	0.0584	0.4324	4930432E11Rik	RIKEN cDNA 4930432E11 gene	Coding
TC0800000948.mm.1	5.26	5.12	1.1	0.0478	0.4106	4930432K21Rik	RIKEN cDNA 4930432K21 gene	Multiple_Complex
TC0300001235.mm.1	3.47	3.55	-1.06	0.8887	0.9659	4930432M17Rik	RIKEN cDNA 4930432M17 gene	Coding
TC0700000722.mm.1	3.21	3.28	-1.05	0.8836	0.9645	4930433I11Rik	RIKEN cDNA 4930433I11 gene	Coding
TC0900001683.mm.1	4.88	4.73	1.11	0.1535	0.5534	4930433N12Rik	RIKEN cDNA 4930433N12 gene	Multiple_Complex
TC1600001617.mm.1	3.45	3.55	-1.07	0.8041	0.9375	4930435E12Rik	RIKEN cDNA 4930435E12 gene	Multiple_Complex
TC1100000684.mm.1	3.86	3.77	1.06	0.2763	0.6632	4930438A08Rik	RIKEN cDNA 4930438A08 gene	Coding
TC1000002529.mm.1	3.29	3.19	1.07	0.8723	0.9615	4930442H23Rik	RIKEN cDNA 4930442H23 gene [Source:MGI Symbol;Acc:MGI:1922144]	Coding
TC1000001850.mm.1	4.23	4.04	1.14	0.0333	0.3865	4930444G20Rik	RIKEN cDNA 4930444G20 gene	Coding
TC0100001995.mm.1	4.06	4.2	-1.1	0.1734	0.573	4930444P10Rik	RIKEN cDNA 4930444P10 gene	Coding
TC1500000281.mm.1	5.62	5.29	1.26	0.0382	0.3948	4930447A16Rik	RIKEN cDNA 4930447A16 gene	Coding
TC1200001911.mm.1	5.07	5.01	1.04	0.5005	0.8047	4930447C04Rik	RIKEN cDNA 4930447C04 gene	Multiple_Complex
TC0X00002339.mm.1	3.94	3.85	1.06	0.0727	0.4558	4930447F04Rik	RIKEN cDNA 4930447F04 gene	Coding
TC0400002191.mm.1	4.11	3.78	1.26	0.0592	0.4339	4930448K20Rik	glyceraldehyde-3-phosphate dehydrogenase pseudogene	Multiple_Complex
TC1400001203.mm.1	4.23	3.89	1.27	0.1365	0.5343	4930449E01Rik	RIKEN cDNA 4930449E01 gene	Multiple_Complex
TC0500003718.mm.1	3.83	3.75	1.06	0.1643	0.565	4930449I24Rik	RIKEN cDNA 4930449I24 gene	Coding
TC1600000042.mm.1	4.67	4.65	1.02	0.9926	0.9982	4930451G09Rik	RIKEN cDNA 4930451G09 gene	Multiple_Complex
TC0700004300.mm.1	6.03	5.84	1.13	0.2965	0.678	4930451I11Rik	RIKEN cDNA 4930451I11 gene	Coding
TC1400001441.mm.1	4.94	4.83	1.08	0.6533	0.88	4930452B06Rik	RIKEN cDNA 4930452B06 gene	Multiple_Complex
TC0X00001941.mm.1	3.66	3.63	1.02	0.8102	0.9402	4930453H23Rik	RIKEN cDNA 4930453H23 gene	Multiple_Complex
TC1600001837.mm.1	9.43	9.64	-1.15	0.0241	0.365	4930453N24Rik	RIKEN cDNA 4930453N24 gene	Multiple_Complex
TC0300001201.mm.1	3.51	3.48	1.02	0.78	0.9288	4930455H04Rik	RIKEN cDNA 4930455H04 gene	Multiple_Complex
TC1800000831.mm.1	3.18	3.05	1.1	0.9206	0.9764	4930465K10Rik	RIKEN cDNA 4930465K10 gene	Multiple_Complex
TC4_GL456350_random00000001.mm.1	6.71	6.47	1.19	0.2104	0.6072	4930466F19RIK	Protein Gm10592; Protein Gm21968	Coding
TC4_JH584293_random00000002.mm.1	8.24	7.98	1.2	0.0474	0.4095	4930466F19RIK	Protein Gm10592; Protein Gm21968	Coding
TC0800000196.mm.1	7.21	7.46	-1.19	0.1058	0.5016	4930467E23Rik; Gm21119; Gm15319	RIKEN cDNA 4930467E23 gene; predicted gene, 21119; predicted gene 15319	Coding
TC1400000155.mm.1	4.85	4.68	1.13	0.0363	0.3918	4930469B13Rik	RIKEN cDNA 4930469B13 gene	Multiple_Complex
TC0100003373.mm.1	3.7	3.16	1.46	0.0291	0.3769	4930469G21Rik	RIKEN cDNA 4930469G21 gene	Multiple_Complex
TC0200005255.mm.1	3.54	3.55	-1.01	0.2681	0.6567	4930470P17Rik	RIKEN cDNA 4930470P17 gene	Multiple_Complex
TC1700001483.mm.1	3.68	3.56	1.09	0.1448	0.5439	4930474M22Rik	RIKEN cDNA 4930474M22 gene; RIKEN cDNA 4930474M22 gene (4930474M22Rik), non-coding RNA.	Multiple_Complex
TC1400000388.mm.1	4.19	4.12	1.05	0.5772	0.8445	4930474N05Rik	RIKEN cDNA 4930474N05 gene	Multiple_Complex
TC0X00000784.mm.1	4.11	4.12	-1.01	0.6227	0.8659	4930480E11Rik	RIKEN cDNA 4930480E11 gene	Coding
TC1900000064.mm.1	7.34	7.16	1.14	0.1507	0.5498	4930481A15Rik	RIKEN cDNA 4930481A15 gene; RIKEN cDNA 4930481A15 gene (4930481A15Rik), transcript variant 1, non-coding RNA.; RIKEN cDNA 4930481A15 gene (4930481A15Rik), transcript variant 2, non-coding RNA.	Multiple_Complex
TC1300002140.mm.1	4.23	3.95	1.22	0.0309	0.3813	4930486L24Rik	RIKEN cDNA 4930486L24 gene	Coding
TC1700001481.mm.1	3.81	3.69	1.09	0.6715	0.8867	4930488N24Rik	PREDICTED: RIKEN cDNA 4930488N24 gene (4930488N24Rik), mRNA.	Multiple_Complex
TC0100001566.mm.1	6.02	6.1	-1.05	0.7997	0.9359	4930500M09Rik; AC123650.4	RIKEN cDNA 4930500M09 gene; RIKEN cDNA 4930500M09 gene [Source:MGI Symbol;Acc:MGI:3630173]; novel protein	Coding
TC0X00000483.mm.1	4.07	3.9	1.13	0.1462	0.5458	4930502E18Rik	RIKEN cDNA 4930502E18 gene	Coding
TC0300003105.mm.1	4.32	4.14	1.13	0.114	0.5096	4930503B20Rik	RIKEN cDNA 4930503B20 gene	Multiple_Complex
TC1400001879.mm.1	4.92	4.72	1.15	0.8221	0.9432	4930503E14Rik	RIKEN cDNA 4930503E14 gene	Coding
TC0X00001590.mm.1	3.56	3.58	-1.01	0.9789	0.9942	4930503H13Rik	gem (nuclear organelle) associated protein 8 pseudogene; RIKEN cDNA 4930503H13 gene	Multiple_Complex
TC1800001539.mm.1	7.82	7.83	-1.01	0.4066	0.7503	4930503L19Rik	RIKEN cDNA 4930503L19 gene	Coding
TC1100002817.mm.1	3.4	3.3	1.08	0.1666	0.566	4930504O13Rik	RIKEN cDNA 4930504O13 gene	Coding
TC1100002436.mm.1	4.48	4.4	1.06	0.4184	0.7579	4930505A04Rik	RIKEN cDNA 4930505A04 gene	Coding
TC1000000582.mm.1	4.53	4.68	-1.11	0.0856	0.4734	4930507D05Rik	RIKEN cDNA 4930507D05 gene	Multiple_Complex
TC0900000636.mm.1	3.74	3.68	1.04	0.5083	0.8088	4930510E17Rik	RIKEN cDNA 4930510E17 gene	Coding
TC1200000578.mm.1	4.46	4.25	1.16	0.0835	0.4705	4930512B01Rik	RIKEN cDNA 4930512B01 gene	Multiple_Complex
TC1100002220.mm.1	4.42	4.35	1.05	0.2827	0.6679	4930512M02Rik	RIKEN cDNA 4930512M02 gene	Multiple_Complex
TC0X00001365.mm.1	4.14	4.03	1.08	0.7488	0.9165	4930513O06Rik	RIKEN cDNA 4930513O06 gene	Coding
TC0200005002.mm.1	4.97	5.16	-1.14	0.3618	0.7216	4930518I15Rik	RIKEN cDNA 4930518I15 gene	Coding
TC1000001928.mm.1	8.12	7.89	1.18	0.2032	0.6018	4930519F09Rik	pyruvate dehydrogenase E1 alpha 1 pseudogene; RIKEN cDNA 4930519F09 gene	Multiple_Complex
TC0X00002770.mm.1	4.29	4.12	1.12	0.104	0.4995	4930519F16Rik	RIKEN cDNA 4930519F16 gene	Multiple_Complex
TC0500001238.mm.1	4.07	3.97	1.07	0.1672	0.5668	4930519G04Rik	RIKEN cDNA 4930519G04 gene	Multiple_Complex
TC0200004945.mm.1	3.94	4.09	-1.1	0.422	0.7601	4930519P11Rik	RIKEN cDNA 4930519P11 gene [Source:MGI Symbol;Acc:MGI:1921971]	Coding
TC0400003269.mm.1	4.17	4.08	1.06	0.398	0.7453	4930522H14Rik	RIKEN cDNA 4930522H14 gene	Coding
TC0500002972.mm.1	8.17	8.1	1.05	0.4779	0.792	4930522L14Rik	RIKEN cDNA 4930522L14 gene	Multiple_Complex
TC0100001451.mm.1	4.82	4.83	-1	0.514	0.8124	4930523C07Rik	RIKEN cDNA 4930523C07 gene	Multiple_Complex
TC1100000326.mm.1	5.02	4.83	1.14	0.1693	0.569	4930524B15Rik	RIKEN cDNA 4930524B15 gene	Coding
TC0500000969.mm.1	5.59	5.58	1.01	0.8222	0.9432	4930524J08Rik	RIKEN cDNA 4930524J08 gene [Source:MGI Symbol;Acc:MGI:1922379]	Coding
TC1700001751.mm.1	6.79	6.69	1.08	0.1582	0.5591	4930526A20Rik	RIKEN cDNA 4930526A20 gene	Multiple_Complex
TC0300000814.mm.1	4.2	4.12	1.06	0.7467	0.9158	4930529C04Rik	zinc finger, BED domain containing 4 pseudogene; RIKEN cDNA 4930529C04 gene	Multiple_Complex
TC1000000682.mm.1	3.48	3.25	1.18	0.0921	0.4836	4930533K18Rik	RIKEN cDNA 4930533K18 gene [Source:MGI Symbol;Acc:MGI:1922439]	Multiple_Complex
TC0700001787.mm.1	3.76	3.63	1.09	0.169	0.5689	4930533L02Rik	RIKEN cDNA 4930533L02 gene	Coding
TC0400003496.mm.1	5.33	5	1.26	0.0567	0.43	4930535I16Rik	RIKEN cDNA 4930535I16 gene [Source:MGI Symbol;Acc:MGI:1922470]	Coding
TC0400004220.mm.1	5.11	5.14	-1.02	0.6294	0.8695	4930538K18Rik	RIKEN cDNA 4930538K18 gene	Coding
TC1700001771.mm.1	3.83	3.69	1.1	0.1147	0.5107	4930539E08Rik	RIKEN cDNA 4930539E08 gene	Coding
TC0900002723.mm.1	3.42	3.22	1.16	0.0322	0.3838	4930542C12Rik	RIKEN cDNA 4930542C12 gene [Source:MGI Symbol;Acc:MGI:1914898]	Coding
TC1100000959.mm.1	5.55	5.35	1.16	0.0562	0.4283	4930544D05Rik	RIKEN cDNA 4930544D05 gene	Multiple_Complex
TC0600000770.mm.1	4.06	3.82	1.19	0.0768	0.462	4930544G11Rik	RIKEN cDNA 4930544G11 gene	Coding
TC0700001956.mm.1	3.88	3.73	1.11	0.3061	0.6855	4930544L04Rik	RIKEN cDNA 4930544L04 gene	Multiple_Complex
TC1800001526.mm.1	4.06	3.79	1.21	0.0512	0.4159	4930546C10Rik	RIKEN cDNA 4930546C10 gene	Multiple_Complex
TC1500000363.mm.1	3.23	3.31	-1.06	0.8922	0.9671	4930548G14Rik	RIKEN cDNA 4930548G14 gene	Multiple_Complex
TC0500000323.mm.1	3.94	3.83	1.08	0.0963	0.4893	4930548H24Rik	RIKEN cDNA 4930548H24 gene	Coding
TC0400001694.mm.1	4.63	4.62	1.01	0.6185	0.8642	4930549C01Rik	RIKEN cDNA 4930549C01 gene	Coding
TC0900000641.mm.1	4.56	4.38	1.13	0.5543	0.8334	4930550C14Rik	RIKEN cDNA 4930550C14 gene	Coding
TC0X00000543.mm.1	4.45	4.45	1	0.9044	0.9711	4930550L24Rik	RIKEN cDNA 4930550L24 gene	Coding
TC0400003025.mm.1	4.45	4.57	-1.08	0.9855	0.996	4930553M12Rik	RIKEN cDNA 4930553M12 gene [Source:MGI Symbol;Acc:MGI:1922496]	Coding
TC0800000571.mm.1	4.21	4.14	1.05	0.3112	0.6892	4930555F03Rik	RIKEN cDNA 4930555F03 gene	Multiple_Complex
TC1400000038.mm.1	5.75	5.48	1.21	0.0042	0.2572	4930555G01Rik	RIKEN cDNA 4930555G01 gene	Coding
TC1100002104.mm.1	3.8	3.63	1.13	0.4255	0.7618	4930556J24Rik	RIKEN cDNA 4930556J24 gene	Coding
TC0X00000121.mm.1	3.15	3.19	-1.03	0.6668	0.8843	4930557A04Rik	RIKEN cDNA 4930557A04 gene	Coding
TC0100003381.mm.1	4.16	3.96	1.14	0.1428	0.5417	4930558K02Rik	RIKEN cDNA 4930558K02 gene	Multiple_Complex
TC1600000036.mm.1	4.17	4.13	1.02	0.4927	0.8007	4930562C15Rik	RIKEN cDNA 4930562C15 gene	Multiple_Complex
TC0100003349.mm.1	4.53	4.4	1.1	0.2548	0.6463	4930562F07Rik	RIKEN cDNA 4930562F07 gene	Multiple_Complex
TC1600002090.mm.1	3.38	3.31	1.05	0.5059	0.8078	4930563D23Rik	RIKEN cDNA 4930563D23 gene	Coding
TC1100000985.mm.1	4.09	4.05	1.03	0.683	0.8913	4930563E22Rik	RIKEN cDNA 4930563E22 gene	Multiple_Complex
TC1400000838.mm.1	3.7	3.84	-1.1	0.2501	0.6423	4930563I02Rik	RIKEN cDNA 4930563I02 gene [Source:MGI Symbol;Acc:MGI:1914909]	Coding
TC0900002345.mm.1	4.16	4.18	-1.01	0.7108	0.9019	4930563M21Rik	RIKEN cDNA 4930563M21 gene	Coding
TC1700002144.mm.1	4.14	4.16	-1.01	0.7364	0.9118	4930564C03Rik	RIKEN cDNA 4930564C03 gene; PREDICTED: RIKEN cDNA 4930564C03 gene (4930564C03Rik), mRNA.	Coding
TC0300001087.mm.1	4.19	3.86	1.26	0.1927	0.5907	4930564D02Rik	RIKEN cDNA 4930564D02 gene	Coding
TC0300002244.mm.1	3.51	3.55	-1.03	0.6666	0.8842	4930565D16Rik	RIKEN cDNA 4930565D16 gene; RIKEN cDNA 4930565D16 gene (4930565D16Rik), non-coding RNA.	Multiple_Complex
TC0300003189.mm.1	5.14	5.36	-1.17	0.6895	0.894	4930566N20Rik	RIKEN cDNA 4930566N20 gene	Coding
TC0X00002386.mm.1	4.07	3.89	1.13	0.7381	0.9124	4930567H17Rik	RIKEN cDNA 4930567H17 gene; Synthetic construct Mus musculus clone IMAGE:100069539, MGC:199441 RIKEN cDNA 4930567H17 gene (4930567H17Rik) mRNA, encodes complete protein.	Coding
TC0200003363.mm.1	3.85	3.74	1.08	0.1594	0.5599	4930568D16Rik	RIKEN cDNA 4930568D16 gene	Coding
TC0500001285.mm.1	5	4.56	1.35	0.0023	0.2286	4930569F06Rik	RIKEN cDNA 4930569F06 gene	Coding
TC0700001790.mm.1	3.57	3.28	1.22	0.7287	0.909	4930571K23Rik	RIKEN cDNA 4930571K23 gene	Multiple_Complex
TC0500001979.mm.1	5.46	5.29	1.12	0.197	0.5952	4930572O03Rik	spermatogenesis associated glutamate (E)-rich protein pseudogene; RIKEN cDNA 4930572O03 gene	Multiple_Complex
TC0X00001909.mm.1	4.37	4.49	-1.09	0.5042	0.8066	4930578C19Rik	RIKEN cDNA 4930578C19 gene	Multiple_Complex
TC0400000419.mm.1	8.72	8.66	1.04	0.1885	0.588	4930578G10Rik	RIKEN cDNA 4930578G10 gene [Source:MGI Symbol;Acc:MGI:1923202]; RIKEN cDNA 4930578G10 gene	Multiple_Complex
TC1400002227.mm.1	4.95	4.91	1.03	0.609	0.86	4930578I06Rik	RIKEN cDNA 4930578I06 gene	Coding
TC1400000952.mm.1	3.92	3.71	1.15	0.3022	0.6825	4930578I07Rik	RIKEN cDNA 4930578I07 gene	Coding
TC0900002813.mm.1	4.07	3.92	1.11	0.2452	0.6375	4930579C12Rik	RIKEN cDNA 4930579C12 gene	Multiple_Complex
TC0300003017.mm.1	4.22	4.04	1.14	0.1404	0.5392	4930579F01Rik	RIKEN cDNA 4930579F01 gene	Coding
TC0300000624.mm.1	5.68	5.61	1.05	0.8662	0.9593	4930579G24Rik	RIKEN cDNA 4930579G24 gene	Coding
TC0900002907.mm.1	4.56	4.66	-1.07	0.2598	0.6503	4930579K19Rik	RIKEN cDNA 4930579K19 gene	Multiple_Complex
TC1700002406.mm.1	3.64	3.6	1.03	0.184	0.5831	4930583I09Rik	RIKEN cDNA 4930583I09 gene	Coding
TC0500002125.mm.1	3.92	3.86	1.04	0.4091	0.7521	4930584F24Rik	RIKEN cDNA 4930584F24 gene	Multiple_Complex
TC0300000622.mm.1	3.82	3.74	1.05	0.5343	0.8231	4930589L23Rik	RIKEN cDNA 4930589L23 gene	Coding
TC0600001094.mm.1	4.18	4.12	1.04	0.1631	0.5634	4930590J08Rik	RIKEN cDNA 4930590J08 gene	Coding
TC0200002771.mm.1	4.69	4.28	1.33	0.073	0.4561	4930591A17Rik	RIKEN cDNA 4930591A17 gene	Multiple_Complex
TC0100002205.mm.1	7.48	7.43	1.03	0.906	0.9718	4930594C11Rik	G1 to S phase transition pseudogene	Multiple_Complex
TC1200002401.mm.1	4.72	4.61	1.08	0.348	0.7119	4930595D18Rik	RIKEN cDNA 4930595D18 gene [Source:MGI Symbol;Acc:MGI:1925312]	Coding
TC0X00002539.mm.1	4.07	4.01	1.05	0.599	0.8555	4930595M18Rik	RIKEN cDNA 4930595M18 gene	Coding
TC1400001738.mm.1	4.18	4.34	-1.12	0.394	0.743	4930596D02Rik	RIKEN cDNA 4930596D02 gene	Coding
TC1400002003.mm.1	4.05	4.05	1	0.4776	0.7919	4930597G03Rik	RIKEN cDNA 4930597G03 gene; RIKEN cDNA 4930597G03 gene (4930597G03Rik), non-coding RNA.	Multiple_Complex
TC0600002421.mm.1	5.25	5.39	-1.1	0.9696	0.9915	4930597O21Rik	RIKEN cDNA 4930597O21 gene	Multiple_Complex
TC0X00000577.mm.1	4.07	4.12	-1.04	0.8654	0.9592	4931400O07Rik	RIKEN cDNA 4931400O07 gene	Coding
TC0700002947.mm.1	4.17	4.06	1.08	0.3367	0.7045	4931406B18Rik	RIKEN cDNA 4931406B18 gene	Multiple_Complex
TC0900001785.mm.1	6.06	6	1.04	0.4464	0.7737	4931406C07Rik	RIKEN cDNA 4931406C07 gene	Multiple_Complex
TC1400000244.mm.1	6.93	6.95	-1.02	0.3544	0.7167	4931406H21Rik	RIKEN cDNA 4931406H21 gene; RIKEN cDNA 4931406H21 gene (4931406H21Rik), non-coding RNA.	Multiple_Complex
TC0700002830.mm.1	8.31	8.26	1.04	0.6843	0.8919	4931406P16Rik	RIKEN cDNA 4931406P16 gene	Multiple_Complex
TC0100002102.mm.1	3.92	3.65	1.21	0.0909	0.4816	4931408C20Rik	RIKEN cDNA 4931408C20 gene	Coding
TC0500002084.mm.1	4.45	4.41	1.03	0.3653	0.7242	4931409K22Rik	RIKEN cDNA 4931409K22 gene	Multiple_Complex
TC1400002060.mm.1	4.81	4.91	-1.07	0.38	0.7338	4931414P19Rik	RIKEN cDNA 4931414P19 gene	Coding
TC0600002509.mm.1	5.9	5.63	1.21	0.0112	0.3124	4931417E11Rik	RIKEN cDNA 4931417E11 gene	Coding
TC0200004235.mm.1	4.22	4.17	1.03	0.8468	0.9517	4931422A03Rik	RIKEN cDNA 4931422A03 gene	Multiple_Complex
TC0200000365.mm.1	4.93	4.93	1	0.8211	0.9428	4931423N10Rik	RIKEN cDNA 4931423N10 gene	Coding
TC0800002814.mm.1	6.63	6.63	-1	0.9418	0.9832	4931428F04Rik	RIKEN cDNA 4931428F04 gene	Multiple_Complex
TC0100002127.mm.1	3.74	3.54	1.15	0.0454	0.4055	4931428L18Rik	RIKEN cDNA 4931428L18 gene	Multiple_Complex
TC0900002104.mm.1	4.99	5.26	-1.21	0.1706	0.57	4931429I11Rik	RIKEN cDNA 4931429I11 gene	Multiple_Complex
TC0900002220.mm.1	4.42	4.32	1.08	0.1692	0.5689	4931429L15Rik	RIKEN cDNA 4931429L15 gene	Coding
TC1300001933.mm.1	3.92	3.81	1.08	0.2201	0.6146	4931429P17Rik	RIKEN cDNA 4931429P17 gene	Multiple_Complex
TC0700003927.mm.1	3.18	3.39	-1.16	0.8299	0.9461	4931431F19Rik	RIKEN cDNA 4931431F19 gene	Coding
TC1100002428.mm.1	6.76	6.57	1.14	0.0268	0.3726	4931440F15Rik	RIKEN cDNA 4931440F15 gene	Coding
TC0300002098.mm.1	4.46	4.47	-1.01	0.8841	0.9646	4931440P22Rik	RIKEN cDNA 4931440P22 gene	Multiple_Complex
TC1100003518.mm.1	3.93	3.97	-1.03	0.5596	0.8361	4932411E22Rik	RIKEN cDNA 4932411E22 gene	Coding
TC0X00002948.mm.1	3.43	3.45	-1.02	0.9977	0.9991	4932411N23Rik	RIKEN cDNA 4932411N23 gene	Coding
TC1100002328.mm.1	4.28	4.05	1.17	0.0414	0.4013	4932414J04Rik	RIKEN cDNA 4932414J04 gene	Multiple_Complex
TC0200000990.mm.1	4.31	4.26	1.04	0.48	0.793	4932414N04Rik	RIKEN cDNA 4932414N04 gene	Multiple_Complex
TC1000002563.mm.1	3.55	3.56	-1	0.7266	0.9082	4932415D10Rik	RIKEN cDNA 4932415D10 gene [Source:MGI Symbol;Acc:MGI:3045298]; RIKEN cDNA 4932415D10 gene	Coding
TC1700000978.mm.1	3.72	3.72	-1	0.9828	0.9954	4932415M13Rik	RIKEN cDNA 4932415M13 gene; RIKEN cDNA 4932415M13 gene (4932415M13Rik), mRNA.	Multiple_Complex
TC0800001192.mm.1	3.14	3.17	-1.02	0.875	0.962	4932416K20Rik	RIKEN cDNA 4932416K20 gene	Multiple_Complex
TC0900001130.mm.1	4.3	4.19	1.08	0.7604	0.9219	4932427H20Rik	RIKEN cDNA 4932427H20 gene	Coding
TC0X00000859.mm.1	4.44	4.27	1.13	0.5905	0.8511	4932429P05Rik	RIKEN cDNA 4932429P05 gene	Coding
TC0Y00000189.mm.1	3.66	3.39	1.2	0.2281	0.6224	4932431L22Rik	RIKEN cDNA 4932431L22 gene	Coding
TC0700000529.mm.1	4.53	4.32	1.16	0.0376	0.3932	4932431P20Rik	RIKEN cDNA 4932431P20 gene	Coding
TC0300000272.mm.1	10.88	11.02	-1.1	0.0928	0.4845	4932438A13Rik	RIKEN cDNA 4932438A13 gene	Multiple_Complex
TC1600002062.mm.1	4.37	4.43	-1.04	0.4933	0.8009	4932438H23Rik	RIKEN cDNA 4932438H23 gene	Coding
TC1000001455.mm.1	3.53	3.46	1.05	0.1405	0.5393	4932442E05Rik	RIKEN cDNA 4932442E05 gene	Coding
TC0800000129.mm.1	4.58	4.55	1.02	0.2537	0.6453	4932443I19Rik	RIKEN cDNA 4932443I19 gene	Coding
TC0X00003378.mm.1	3.81	3.72	1.07	0.7769	0.9277	4933400A11Rik	capping protein (actin filament) muscle Z-line, alpha 1 pseudogene	Multiple_Complex
TC0X00001089.mm.1	4.95	4.78	1.13	0.2758	0.663	4933401B06Rik	GLE1 RNA export mediator pseudogene; RIKEN cDNA 4933401B06 gene	Multiple_Complex
TC0100002458.mm.1	3.09	3.43	-1.27	0.1897	0.5884	4933402D24Rik	RIKEN cDNA 4933402D24 gene	Coding
TC0X00000574.mm.1	4.11	4.16	-1.03	0.6123	0.8615	4933402E13Rik	RIKEN cDNA 4933402E13 gene	Coding
TC0800001021.mm.1	4.11	3.95	1.12	0.2885	0.6722	4933402J07Rik	RIKEN cDNA 4933402J07 gene	Coding
TC0700004393.mm.1	3.41	3.22	1.14	0.106	0.502	4933402N03Rik	RIKEN cDNA 4933402N03 gene	Coding
TC0500000079.mm.1	4.85	4.86	-1	0.6383	0.8741	4933402N22Rik	RIKEN cDNA 4933402N22 gene	Coding
TC1100003067.mm.1	3.82	3.78	1.03	0.7851	0.9312	4933402P03Rik	RIKEN cDNA 4933402P03 gene	Coding
TC0X00001122.mm.1	4.09	3.92	1.13	0.0413	0.4012	4933403O08Rik	RIKEN cDNA 4933403O08 gene	Coding
TC0800001228.mm.1	4.66	4.49	1.12	0.2827	0.6679	4933405L10Rik	RIKEN cDNA 4933405L10 gene	Coding
TC0700000910.mm.1	4.95	4.88	1.05	0.947	0.9848	4933405O20Rik	RIKEN cDNA 4933405O20 gene	Coding
TC0200001840.mm.1	4.28	4.28	-1	0.8587	0.9571	4933406J08Rik	RIKEN cDNA 4933406J08 gene	Multiple_Complex
TC0100001226.mm.1	4.52	4.6	-1.06	0.923	0.9769	4933406M09Rik	RIKEN cDNA 4933406M09 gene	Coding
TC1000001829.mm.1	3.06	3.06	1	0.9668	0.9906	4933406P04Rik	RIKEN cDNA 4933406P04 gene [Source:MGI Symbol;Acc:MGI:1921670]	Coding
TC0100000775.mm.1	4.41	4.42	-1	0.8604	0.9577	4933407L21Rik	RIKEN cDNA 4933407L21 gene	Multiple_Complex
TC1800001151.mm.1	4.97	4.91	1.04	0.2141	0.61	4933408B17Rik	RIKEN cDNA 4933408B17 gene	Coding
TC1000001136.mm.1	3.44	3.39	1.04	0.6445	0.8764	4933408J17Rik	RIKEN cDNA 4933408J17 gene	Multiple_Complex
TC0200000989.mm.1	4.39	4.21	1.13	0.3122	0.69	4933409G03Rik	RIKEN cDNA 4933409G03 gene	Coding
TC4_JH584293_random00000012.mm.1	9.6	9.45	1.11	0.107	0.5033	4933409K07Rik	RIKEN cDNA 4933409K07 gene	Coding
TC4_GL456350_random00000002.mm.1	8.12	8.05	1.05	0.9291	0.9796	4933409K07Rik	RIKEN cDNA 4933409K07 gene (4933409K07Rik), non-coding RNA.; RIKEN cDNA 4933409K07 gene, mRNA (cDNA clone MGC:99968 IMAGE:30532552), complete cds.; RIKEN cDNA 4933409K07 gene	Multiple_Complex
TC0400002488.mm.1	8.65	8.54	1.08	0.5303	0.8214	4933409K07Rik	RIKEN cDNA 4933409K07 gene	Multiple_Complex
TC4_JH584293_random00000004.mm.1	8.65	8.54	1.08	0.5303	0.8214	4933409K07Rik	RIKEN cDNA 4933409K07 gene (4933409K07Rik), non-coding RNA.; RIKEN cDNA 4933409K07 gene, mRNA (cDNA clone MGC:99968 IMAGE:30532552), complete cds.; RIKEN cDNA 4933409K07 gene	Multiple_Complex
TC1000002149.mm.1	4.08	4.1	-1.01	0.2903	0.6738	4933411G06Rik	Sumo1 pseudogene; RIKEN cDNA 4933411G06 gene	Multiple_Complex
TC1900000607.mm.1	4.37	4.24	1.09	0.1453	0.5447	4933411K16Rik; Hoga1	RIKEN cDNA 4933411K16 gene; 4-hydroxy-2-oxoglutarate aldolase 1	Multiple_Complex
TC1900000860.mm.1	3.54	3.58	-1.03	0.6271	0.868	4933412A08Rik	RIKEN cDNA 4933412A08 gene [Source:MGI Symbol;Acc:MGI:1921695]	Multiple_Complex
TC1500001601.mm.1	4.01	4.03	-1.01	0.5727	0.8423	4933412E24Rik	RIKEN cDNA 4933412E24 gene	Coding
TC1100002685.mm.1	4.32	4.21	1.08	0.7219	0.9062	4933414I15Rik	RIKEN cDNA 4933414I15 gene	Multiple_Complex
TC1100000430.mm.1	6.95	6.92	1.02	0.4152	0.756	4933415A04Rik	RIKEN cDNA 4933415A04 gene [Source:MGI Symbol;Acc:MGI:1922977]	Coding
TC0100002061.mm.1	2.8	2.89	-1.06	0.67	0.8858	4933415F23Rik	RIKEN cDNA 4933415F23 gene	Multiple_Complex
TC1000002905.mm.1	4.43	4.64	-1.15	0.9926	0.9982	4933416C03Rik	RIKEN cDNA 4933416C03 gene	Coding
TC0200002446.mm.1	4.44	4.3	1.1	0.1304	0.5281	4933416E03Rik	RIKEN cDNA 4933416E03 gene	Multiple_Complex
TC0X00001836.mm.1	3.58	3.58	-1	0.7591	0.9212	4933416E14Rik	RIKEN cDNA 4933416E14 gene	Multiple_Complex
TC0X00000482.mm.1	3.75	3.84	-1.06	0.5213	0.8166	4933416I08Rik	RIKEN cDNA 4933416I08 gene; RIKEN cDNA 4933416I08 gene (4933416I08Rik), mRNA.	Multiple_Complex
TC1300000397.mm.1	3.74	3.69	1.04	0.9634	0.9895	4933417A18Rik	RIKEN cDNA 4933417A18 gene	Coding
TC0700002922.mm.1	3.74	4.02	-1.21	0.1033	0.4987	4933421I07Rik	RIKEN cDNA 4933421I07 gene	Coding
TC1300001183.mm.1	3.31	3.21	1.07	0.4195	0.7586	4933425L06Rik	RIKEN cDNA 4933425L06 gene	Coding
TC0600001044.mm.1	4.06	4.03	1.02	0.6996	0.8983	4933427D06Rik	RIKEN cDNA 4933427D06 gene	Coding
TC1100003138.mm.1	6.63	6.64	-1.01	0.876	0.9623	4933427D14Rik	RIKEN cDNA 4933427D14 gene	Multiple_Complex
TC1500000541.mm.1	3.75	3.66	1.06	0.8548	0.9553	4933427E11Rik	RIKEN cDNA 4933427E11 gene	Multiple_Complex
TC0700001738.mm.1	3.72	3.61	1.07	0.2075	0.6048	4933427G17Rik	RIKEN cDNA 4933427G17 gene	Coding
TC0500002063.mm.1	4.92	4.73	1.14	0.1139	0.5094	4933427G23Rik	RIKEN cDNA 4933427G23 gene	Multiple_Complex
TC0400001407.mm.1	4.66	4.72	-1.04	0.8215	0.943	4933427I04Rik	Riken cDNA 4933427I04 gene [Source:MGI Symbol;Acc:MGI:3613760]	Coding
TC1100003645.mm.1	4.7	4.71	-1.01	0.3504	0.7138	4933428G20Rik	RIKEN cDNA 4933428G20 gene	Coding
TC0X00001366.mm.1	3.75	3.6	1.11	0.2978	0.6792	4933428M09Rik	RIKEN cDNA 4933428M09 gene	Coding
TC0300001790.mm.1	5.23	5.08	1.11	0.5843	0.8476	4933429H19Rik	RIKEN cDNA 4933429H19 gene [Source:MGI Symbol;Acc:MGI:1918530]	Coding
TC0400000704.mm.1	4.23	4.27	-1.02	0.6059	0.8587	4933430I17Rik	RIKEN cDNA 4933430I17 gene	Coding
TC0200003134.mm.1	4.14	3.99	1.11	0.0655	0.4453	4933433C11Rik	RIKEN cDNA 4933433C11 gene; RIKEN cDNA 4933433C11 gene (4933433C11Rik), mRNA.	Multiple_Complex
TC0300000775.mm.1	7.99	8.03	-1.03	0.1925	0.5906	4933434E20Rik; 1700094D03Rik	RIKEN cDNA 4933434E20 gene; RIKEN cDNA 1700094D03 gene; RIKEN cDNA 4933434E20 gene (4933434E20Rik), transcript variant 1, mRNA.	Multiple_Complex
TC0X00002366.mm.1	3.87	3.62	1.19	0.0581	0.4314	4933436I01Rik	RIKEN cDNA 4933436I01 gene	Coding
TC0700004253.mm.1	3.81	3.8	1.01	0.9565	0.9878	4933440M02Rik	RIKEN cDNA 4933440M02 gene	Multiple_Complex
TC0600002990.mm.1	4.33	4.37	-1.03	0.791	0.9333	4933440N22Rik	RIKEN cDNA 4933440N22 gene	Coding
TC0500002123.mm.1	5.63	5.43	1.14	0.7322	0.9103	5031410I06Rik	RIKEN cDNA 5031410I06 gene	Coding
TC1400001052.mm.1	4.72	4.71	1	0.7856	0.9313	5031414D18Rik	RIKEN cDNA 5031414D18 gene	Coding
TC0500002045.mm.1	6.3	6.42	-1.09	0.1099	0.5063	5031425E22Rik	RIKEN cDNA 5031425E22 gene	Multiple_Complex
TC0600002898.mm.1	3.27	3.1	1.13	0.0595	0.4346	5031434C07Rik	RIKEN cDNA 5031434C07 gene	Multiple_Complex
TC1500001996.mm.1	8.46	8.45	1.01	0.5415	0.8265	5031439G07Rik; Mir1249	RIKEN cDNA 5031439G07 gene; microRNA 1249	Multiple_Complex
TC0500002212.mm.1	4.19	4.12	1.05	0.4747	0.7901	5033423K11Rik	RIKEN cDNA 5033423K11 gene [Source:MGI Symbol;Acc:MGI:1923233]	Multiple_Complex
TC1300000527.mm.1	4.99	4.76	1.17	0.0912	0.4821	5033430I15Rik	RIKEN cDNA 5033430I15 gene	Coding
TC0200004662.mm.1	4.58	4.37	1.15	0.3618	0.7215	5330413P13Rik	RIKEN cDNA 5330413P13 gene	Multiple_Complex
TC0300002743.mm.1	5.4	5.34	1.05	0.3874	0.7384	5330417C22Rik	RIKEN cDNA 5330417C22 gene	Multiple_Complex
TC0700004036.mm.1	3.5	3.61	-1.08	0.7633	0.9224	5330417H12Rik	RIKEN cDNA 5330417H12 gene	Coding
TC1000001340.mm.1	7.07	6.93	1.1	0.3147	0.6916	5330438D12Rik; LOC100504423	RIKEN cDNA 5330438D12 gene [Source:MGI Symbol;Acc:MGI:3026931]; PREDICTED: uncharacterized LOC100504423 (LOC100504423), mRNA.	Multiple_Complex
TC0100003465.mm.1	3.8	3.66	1.1	0.5322	0.8219	5330438I03Rik	RIKEN cDNA 5330438I03 gene [Source:MGI Symbol;Acc:MGI:2685831]	Coding
TC0600001687.mm.1	4.67	4.88	-1.15	0.3318	0.7021	5330439B14Rik	RIKEN cDNA 5330439B14 gene; RIKEN cDNA 5330439B14 gene (5330439B14Rik), non-coding RNA.	Multiple_Complex
TC0600001551.mm.1	3.89	3.73	1.12	0.0387	0.396	5430401F13Rik	RIKEN cDNA 5430401F13 gene	Coding
TC0X00002508.mm.1	4.2	4.23	-1.02	0.7108	0.9019	5430402E10Rik	RIKEN cDNA 5430402E10 gene	Coding
TC0500002971.mm.1	7.98	7.93	1.03	0.4743	0.7899	5430403G16Rik	RIKEN cDNA 5430403G16 gene [Source:MGI Symbol;Acc:MGI:1924450]	Coding
TC0200005000.mm.1	6.42	6.41	1	0.8406	0.9499	5430405H02Rik	RIKEN cDNA 5430405H02 gene	Multiple_Complex
TC0400000451.mm.1	3.92	3.74	1.14	0.2761	0.6632	5430416O09Rik	RIKEN cDNA 5430416O09 gene	Multiple_Complex
TC0200001745.mm.1	8.38	8.62	-1.19	0.2397	0.6332	5430417L22Rik; Inafm2; RP23-172B16.3	RIKEN cDNA 5430417L22 gene (5430417L22Rik), long non-coding RNA.; InaF motif containing 2 [Source:MGI Symbol;Acc:MGI:1915354]; RIKEN cDNA 5430417L22 gene; novel transcript (5430417L22Rik)	Multiple_Complex
TC0700001916.mm.1	4.5	4.54	-1.03	0.5312	0.8216	5430419D17Rik	RIKEN cDNA 5430419D17 gene	Multiple_Complex
TC0X00000836.mm.1	4.45	4.49	-1.02	0.8516	0.9541	5430427O19Rik	RIKEN cDNA 5430427O19 gene	Coding
TC0600001576.mm.1	3.91	3.74	1.12	0.3075	0.6863	5530400C23Rik	RIKEN cDNA 5530400C23 gene	Coding
TC1100001215.mm.1	3.18	3	1.13	0.2371	0.631	5530401A14Rik	RIKEN cDNA 5530401A14 gene	Multiple_Complex
TC1900001074.mm.1	6.21	6.22	-1.01	0.4044	0.7494	5730408K05Rik; Mir5136	RIKEN cDNA 5730408K05 gene; microRNA 5136; RIKEN cDNA 5730408K05 gene (5730408K05Rik), non-coding RNA.	Multiple_Complex
TC0400001467.mm.1	7.25	7.1	1.11	0.0709	0.453	5730409E04Rik	RIKEN cDNA 5730409E04Rik gene	Coding
TC0X00001099.mm.1	3.75	3.6	1.11	0.4608	0.7819	5730416F02Rik	capping protein (actin filament), gelsolin-like pseudogene; RIKEN cDNA 5730416F02 gene	Multiple_Complex
TC1100003342.mm.1	9.17	9.21	-1.03	0.4065	0.7503	5730455P16Rik	RIKEN cDNA 5730455P16 gene	Multiple_Complex
TC0300003166.mm.1	4.34	4.39	-1.04	0.9259	0.9782	5730460C07Rik	RIKEN cDNA 5730460C07 gene	Multiple_Complex
TC1200000155.mm.1	5.12	4.95	1.12	0.0696	0.4515	5730507C01Rik	RIKEN cDNA 5730507C01 gene	Coding
TC0300002920.mm.1	7.34	7.42	-1.06	0.5597	0.8361	5730508B09Rik	RIKEN cDNA 5730508B09 gene	Coding
TC1100002392.mm.1	4.41	4.45	-1.03	0.8292	0.9458	5730522E02Rik	RIKEN cDNA 5730522E02 gene	Multiple_Complex
TC0100003142.mm.1	4.14	4.11	1.02	0.734	0.911	5730559C18Rik	RIKEN cDNA 5730559C18 gene	Coding
TC0600000621.mm.1	3.61	3.46	1.1	0.4619	0.7823	5730596B20Rik	RIKEN cDNA 5730596B20 gene	Coding
TC0700002008.mm.1	4.5	4.42	1.05	0.1035	0.4992	5830411N06Rik	RIKEN cDNA 5830411N06 gene	Coding
TC0300003211.mm.1	9.38	9.52	-1.1	0.2659	0.6554	5830417I10Rik	gon-4-like pseudogene; RIKEN cDNA 5830417I10 gene	Multiple_Complex
TC0900001606.mm.1	5.66	5.44	1.17	0.3352	0.7034	5830454E08Rik	RIKEN cDNA 5830454E08 gene	Multiple_Complex
TC0900003109.mm.1	5.96	5.7	1.2	0.3047	0.6845	5830462I19Rik	RIKEN cDNA 5830462I19 gene	Coding
TC0100000827.mm.1	7.39	7.4	-1.01	0.9106	0.9733	5830472F04Rik	RIKEN cDNA 5830472F04 gene	Coding
TC0500000837.mm.1	4.08	4.16	-1.06	0.7443	0.915	5830473C10Rik	RIKEN cDNA 5830473C10 gene	Multiple_Complex
TC0400004120.mm.1	4	4.49	-1.41	0.005	0.2607	5930403L14Rik	RIKEN cDNA 5930403L14 gene; RIKEN cDNA 5930403L14 gene (5930403L14Rik), non-coding RNA.	Multiple_Complex
TC1000000313.mm.1	5.24	4.87	1.29	0.0184	0.3466	5930403N24Rik	RIKEN cDNA 5930403N24 gene [Source:MGI Symbol;Acc:MGI:2444171]	Multiple_Complex
TC0800000388.mm.1	7.26	7.43	-1.12	0.1699	0.5697	5930422O12Rik	RIKEN cDNA 5930422O12 gene	Multiple_Complex
TC1500001069.mm.1	4.46	4.58	-1.09	0.8819	0.9637	6030408B16Rik	RIKEN cDNA 6030408B16 gene	Multiple_Complex
TC0900000735.mm.1	9.22	9.35	-1.09	0.2065	0.6042	6030419C18Rik	RIKEN cDNA 6030419C18 gene	Coding
TC0400001687.mm.1	3.84	3.95	-1.08	0.4787	0.7923	6030445D17Rik	RIKEN cDNA 6030445D17 gene	Coding
TC0800001252.mm.1	3.96	4	-1.03	0.7138	0.9031	6030452D12Rik	RIKEN cDNA 6030452D12 gene	Coding
TC1500001234.mm.1	7.61	7.71	-1.07	0.9433	0.9836	6030458C11Rik	RIKEN cDNA 6030458C11 gene	Coding
TC1100001970.mm.1	4.71	4.58	1.09	0.117	0.5132	6030468B19Rik	RIKEN cDNA 6030468B19 gene	Coding
TC1200000261.mm.1	4.46	4.31	1.11	0.1223	0.5198	6030469F06Rik	RIKEN cDNA 6030469F06 gene	Multiple_Complex
TC0X00000376.mm.1	4.07	3.78	1.22	0.0492	0.4113	6030498E09Rik	RIKEN cDNA 6030498E09 gene	Coding
TC0100003666.mm.1	4.7	4.83	-1.09	0.4176	0.7576	6330403A02Rik	RIKEN cDNA 6330403A02 gene	Coding
TC1100003122.mm.1	6.84	6.67	1.13	0.2888	0.6722	6330403K07Rik	RIKEN cDNA 6330403K07 gene	Multiple_Complex
TC0500001666.mm.1	6.21	6.02	1.14	0.3579	0.719	6330403L08Rik	RIKEN cDNA 6330403L08 gene [Source:MGI Symbol;Acc:MGI:1917994]	Multiple_Complex
TC0700002366.mm.1	5.94	5.99	-1.04	0.9043	0.9711	6330408A02Rik	RIKEN cDNA 6330408A02 gene	Multiple_Complex
TC0200003310.mm.1	4.74	4.6	1.1	0.0273	0.3731	6330409D20Rik	RIKEN cDNA 6330409D20 gene	Multiple_Complex
TC0600002528.mm.1	8.8	8.88	-1.06	0.771	0.9255	6330415B21Rik	RIKEN cDNA 6330415B21 gene; RIKEN cDNA 6330415B21 gene (6330415B21Rik), non-coding RNA.	Multiple_Complex
TC0400000726.mm.1	5.62	5.56	1.04	0.3949	0.7435	6330416G13Rik	RIKEN cDNA 6330416G13 gene	Multiple_Complex
TC0300002523.mm.1	5.03	5.05	-1.02	0.8975	0.9686	6330549D23Rik	RIKEN cDNA 6330549D23 gene	Multiple_Complex
TC0300002474.mm.1	5.62	5.39	1.17	0.2661	0.6554	6330562C20Rik; RP24-372P19.1; AK144859; Gm10691	RIKEN cDNA 6330562C20 gene [Source:MGI Symbol;Acc:MGI:1923443]; novel transcript, antisense to Cers2; lung RCB-0558 LLC cDNA, RIKEN full-length enriched library, clone:G730044K14 product:hypothetical protein, full insert sequence.; PREDICTED: predicted gene 10691 (Gm10691), miscRNA.	Multiple_Complex
TC1200001136.mm.1	7.58	7.44	1.1	0.163	0.5631	6430411K18Rik; Mir127; Mir433	RIKEN cDNA 6430411K18 gen; microRNA 127; microRNA 433; RIKEN cDNA 6430411K18 gen (6430411K18Rik), non-coding RNA.	Multiple_Complex
TC0200002181.mm.1	7.26	6.97	1.22	0.0792	0.4658	6430503K07Rik	RIKEN cDNA 6430503K07 gene	Multiple_Complex
TC0700004486.mm.1	4.52	4.43	1.07	0.1216	0.5187	6430531B16Rik	RIKEN cDNA 6430531B16 gene	Multiple_Complex
TC0800001436.mm.1	10.69	10.86	-1.13	0.0936	0.4855	6430548M08Rik	RIKEN cDNA 6430548M08 gene	Multiple_Complex
TC0200004979.mm.1	4.98	4.9	1.06	0.2193	0.614	6430550D23Rik	RIKEN cDNA 6430550D23 gene	Multiple_Complex
TC0900001366.mm.1	6.53	6.68	-1.11	0.4284	0.7635	6430571L13Rik	RIKEN cDNA 6430571L13 gene	Multiple_Complex
TC0800000449.mm.1	10.25	10.33	-1.06	0.3872	0.7384	6430573F11Rik	RIKEN cDNA 6430573F11 gene	Multiple_Complex
TC0600000212.mm.1	5.77	6	-1.18	0.1285	0.5263	6530409C15Rik	RIKEN cDNA 6530409C15 gene	Coding
TC1300002169.mm.1	6.48	6.61	-1.09	0.0935	0.4855	6720489N17Rik	RIKEN cDNA 6720489N17 gene	Coding
TC0200002282.mm.1	5.61	5.61	1	0.4617	0.7823	6820408C15Rik	RIKEN cDNA 6820408C15 gene; RIKEN cDNA 6820408C15 gene (6820408C15Rik), mRNA.	Multiple_Complex
TC0800003240.mm.1	12.53	12.59	-1.04	0.3123	0.6901	6820431F20Rik; 2610005L07Rik	cadherin 11 pseudogene; RIKEN cDNA 6820431F20 gene	Multiple_Complex
TC0800003222.mm.1	12.93	13.02	-1.07	0.1359	0.5336	6820431F20Rik; Gm21092	RIKEN cDNA 6820431F20 gene, mRNA (cDNA clone MGC:67188 IMAGE:6825946), complete cds.; predicted gene, 21092; cadherin 11 pseudogene	Multiple_Complex
TC0900001240.mm.1	3.65	3.77	-1.09	0.631	0.8702	7420426K07Rik	RIKEN cDNA 7420426K07 gene	Coding
TC0100003395.mm.1	4.21	4.25	-1.03	0.7776	0.9279	7420461P10Rik	RIKEN cDNA 7420461P10 gene	Coding
TC1500002002.mm.1	5.72	5.58	1.1	0.609	0.86	7530416G11Rik	RIKEN cDNA 7530416G11 gene	Multiple_Complex
TC0200002199.mm.1	3.97	3.83	1.1	0.1735	0.573	8030411F24Rik	RIKEN cDNA 8030411F24 gene	Coding
TC1300000867.mm.1	4.96	4.77	1.14	0.4701	0.7871	8030423J24Rik	RIKEN cDNA 8030423J24 gene	Coding
TC1800001628.mm.1	9.15	9.32	-1.12	0.0633	0.4411	8030462N17Rik	RIKEN cDNA 8030462N17 gene	Coding
TC0X00000986.mm.1	3.94	3.91	1.02	0.7355	0.9115	8030474K03Rik	RIKEN cDNA 8030474K03 gene	Multiple_Complex
TC0600001308.mm.1	4.68	4.82	-1.1	0.6157	0.8632	8430408G22Rik	RIKEN cDNA 8430408G22 gene	Coding
TC0500001830.mm.1	4.63	4.2	1.35	0.0131	0.3235	8430423G03Rik	RIKEN cDNA 8430423G03 gene	Multiple_Complex
TC0100000319.mm.1	4.2	4.19	1	0.6599	0.8818	8430432A02Rik	RIKEN cDNA 8430432A02 gene [Source:MGI Symbol;Acc:MGI:1918774]	Coding
TC1700002768.mm.1	9.93	9.91	1.02	0.9983	0.9993	9030025P20Rik	RIKEN cDNA 9030025P20 gene	Coding
TC1000000390.mm.1	6.12	6.02	1.07	0.9483	0.9853	9030612E09Rik	RIKEN cDNA 9030612E09 gene	Multiple_Complex
TC1200000996.mm.1	4.84	4.95	-1.08	0.3836	0.736	9030617O03Rik	RIKEN cDNA 9030617O03 gene	Multiple_Complex
TC1500001736.mm.1	4.75	4.6	1.11	0.2101	0.607	9030619P08Rik	lymphocyte antigen 6 complex pseudogene; RIKEN cDNA 9030619P08 gene	Multiple_Complex
TC1200001527.mm.1	6.84	6.91	-1.06	0.3239	0.6975	9030624G23Rik	RIKEN cDNA 9030624G23 gene	Coding
TC0700001702.mm.1	8.5	8.54	-1.03	0.6422	0.8759	9030624J02Rik	RIKEN cDNA 9030624J02 gene	Multiple_Complex
TC1700002107.mm.1	4.03	3.96	1.05	0.1298	0.5274	9130008F23Rik	RIKEN cDNA 9130008F23 gene	Coding
TC1900001592.mm.1	9.31	9.36	-1.03	0.4635	0.7834	9130011E15Rik	RIKEN cDNA 9130011E15 gene	Multiple_Complex
TC0700004662.mm.1	6.15	6.19	-1.03	0.9328	0.9808	9130019O22Rik	RIKEN cDNA 9130019O22 gene	Coding
TC0700004360.mm.1	5.67	5.68	-1.01	0.7744	0.9269	9130023H24Rik	RIKEN cDNA 9130023H24 gene	Coding
TC0300002378.mm.1	4.49	4.86	-1.3	0.7895	0.9328	9130204L05Rik	RIKEN cDNA 9130204L05 gene	Coding
TC0700003993.mm.1	3.99	4.01	-1.01	0.8572	0.9564	9130208D14Rik	RIKEN cDNA 9130208D14 gene	Multiple_Complex
TC1100003031.mm.1	5.5	5.38	1.09	0.785	0.9312	9130213A22Rik	RIKEN cDNA 9130213A22 gene	Coding
TC0700000408.mm.1	9.91	9.97	-1.04	0.4438	0.7719	9130221H12Rik	RIKEN cDNA 9130221H12 gene	Multiple_Complex
TC0500002503.mm.1	4.22	4.16	1.04	0.5579	0.8354	9130230L23Rik	RIKEN cDNA 9130230L23 gene	Multiple_Complex
TC1500002341.mm.1	8.35	8.31	1.03	0.5699	0.8408	9130401M01Rik	RIKEN cDNA 9130401M01 gene	Multiple_Complex
TC0100001726.mm.1	4	4.12	-1.08	0.2163	0.6118	9130409I23Rik	RIKEN cDNA 9130409I23 gene	Coding
TC1100000561.mm.1	3.68	3.67	1.01	0.353	0.7156	9230009I02Rik	RIKEN cDNA 9230009I02 gene	Multiple_Complex
TC1000000001.mm.1	3.7	3.45	1.19	0.1038	0.4995	9230019H11Rik	RIKEN cDNA 9230019H11 gene	Coding
TC0200004815.mm.1	4.14	4.09	1.04	0.9083	0.9724	9230104L09Rik	RIKEN cDNA 9230104L09 gene	Multiple_Complex
TC1200001276.mm.1	4.93	4.88	1.03	0.2982	0.6795	9230104M06Rik	RIKEN cDNA 9230104M06 gene [Source:MGI Symbol;Acc:MGI:3642845]	Multiple_Complex
TC1000000144.mm.1	4.08	3.82	1.2	0.0579	0.4312	9230106D20Rik	RIKEN cDNA 9230106D20 gene [Source:MGI Symbol;Acc:MGI:3045371]	Coding
TC1500001276.mm.1	3.92	3.98	-1.04	0.8147	0.9416	9230109A22Rik	RIKEN cDNA 9230109A22 gene	Coding
TC0900001725.mm.1	6.69	7.03	-1.27	0.0077	0.2873	9230110C19Rik	RIKEN cDNA 9230110C19 gene	Coding
TC0900002026.mm.1	4.19	4.35	-1.11	0.7183	0.9047	9230110F15Rik	RIKEN cDNA 9230110F15 gene	Coding
TC1400001729.mm.1	3.74	3.9	-1.12	0.3002	0.6809	9230112D13Rik	RIKEN cDNA 9230112D13 gene	Coding
TC0900000342.mm.1	3.63	3.93	-1.24	0.0539	0.422	9230113P08Rik	RIKEN cDNA 9230113P08 gene	Multiple_Complex
TC1800001730.mm.1	7.86	8.48	-1.54	0.0404	0.3994	9330132A10Rik	RIKEN cDNA 9330132A10 gene [Source:MGI Symbol;Acc:MGI:2442380]	Multiple_Complex
TC0800001488.mm.1	5.81	5.68	1.09	0.6506	0.8789	9330133O14Rik	RIKEN cDNA 9330133O14 gene	Multiple_Complex
TC1200000564.mm.1	8.78	8.75	1.03	0.9329	0.9808	9330151L19Rik	RIKEN cDNA 9330151L19 gene	Multiple_Complex
TC0900002775.mm.1	5.18	5.05	1.09	0.0845	0.4721	9330154J02Rik	RIKEN cDNA 9330154J02 gene	Multiple_Complex
TC1000000264.mm.1	10.58	10.69	-1.08	0.1179	0.514	9330159F19Rik	RIKEN cDNA 9330159F19 gene	Multiple_Complex
TC0500000885.mm.1	6.88	7.12	-1.18	0.4421	0.7714	9330159N05Rik	RIKEN cDNA 9330159N05 gene	Coding
TC1100003029.mm.1	4.98	4.83	1.1	0.8388	0.9493	9330160F10Rik	RIKEN cDNA 9330160F10 gene [Source:MGI Symbol;Acc:MGI:3693095]	Multiple_Complex
TC1200002266.mm.1	5.81	6.06	-1.19	0.1209	0.518	9330161L09Rik	RIKEN cDNA 9330161L09 gene [Source:MGI Symbol;Acc:MGI:1924475]	Coding
TC0700001132.mm.1	4.61	4.65	-1.03	0.3331	0.7028	9330171B17Rik; RP24-173K12.2	RIKEN cDNA 9330171B17 gene [Source:MGI Symbol;Acc:MGI:3696417]; novel protein (9330171B17Rik); RIKEN cDNA 9330171B17 gene	Coding
TC0500000060.mm.1	9.26	9.6	-1.27	0.0156	0.3334	9330182L06Rik	RIKEN cDNA 9330182L06 gene	Multiple_Complex
TC1500000313.mm.1	3.98	3.72	1.2	0.0216	0.3571	9330182O14Rik	RIKEN cDNA 9330182O14 gene	Multiple_Complex
TC0800001028.mm.1	5.32	5.47	-1.11	0.6632	0.8828	9430002A10Rik	RIKEN cDNA 9430002A10 gene	Coding
TC0400001851.mm.1	3.56	3.44	1.08	0.4459	0.7736	9430007A20Rik	RIKEN cDNA 9430007A20 gene	Coding
TC0400002105.mm.1	6.58	6.53	1.04	0.5188	0.8154	9430015G10Rik	RIKEN cDNA 9430015G10 gene	Multiple_Complex
TC0100000422.mm.1	8.65	8.79	-1.1	0.1574	0.5583	9430016H08Rik	RIKEN cDNA 9430016H08 gene	Coding
TC1800000015.mm.1	8.05	8.32	-1.21	0.0735	0.4563	9430020K01Rik	RIKEN cDNA 9430020K01 gene	Multiple_Complex
TC0400002126.mm.1	7.2	7.06	1.1	0.2052	0.603	9430025C20Rik	RIKEN cDNA 9430025C20 gene [Source:MGI Symbol;Acc:MGI:3045277]	Multiple_Complex
TC0900002802.mm.1	7.13	7.3	-1.13	0.6102	0.8606	9430037G07Rik	RIKEN cDNA 9430037G07 gene	Multiple_Complex
TC0700004465.mm.1	5.48	5.37	1.08	0.9611	0.989	9430038I01Rik	RIKEN cDNA 9430038I01 gene	Multiple_Complex
TC0700002145.mm.1	6.02	5.99	1.02	0.924	0.9774	9430041J12Rik	RIKEN cDNA 9430041J12 gene	Multiple_Complex
TC1500001344.mm.1	4.35	4.25	1.08	0.1182	0.5143	9430069I07Rik	RIKEN cDNA 9430069I07 gene	Coding
TC0200003305.mm.1	4.25	4.21	1.02	0.5394	0.8255	9430097D07Rik	RIKEN cDNA 9430097D07 gene [Source:MGI Symbol;Acc:MGI:2441749]	Coding
TC0400001381.mm.1	4.04	4.03	1	0.9181	0.9757	9530002B09Rik	RIKEN cDNA 9530002B09 gene; Synthetic construct Mus musculus clone IMAGE:100015767, MGC:183429 RIKEN cDNA 9530002B09 gene (9530002B09Rik) mRNA, encodes complete protein.	Coding
TC1000002927.mm.1	3.81	3.65	1.12	0.5211	0.8165	9530003J23Rik	RIKEN cDNA 9530003J23 gene	Coding
TC0700000486.mm.1	3.97	3.98	-1.01	0.9288	0.9794	9530053A07Rik	RIKEN cDNA 9530053A07 gene; Synthetic construct Mus musculus clone IMAGE:100016454, MGC:184505 RIKEN cDNA 9530053A07 gene (9530053A07Rik) mRNA, encodes complete protein.	Multiple_Complex
TC0500003559.mm.1	4.66	4.81	-1.11	0.0891	0.4786	9530056K15Rik	RIKEN cDNA 9530056K15 gene [Source:MGI Symbol;Acc:MGI:2444456]	Multiple_Complex
TC1100000593.mm.1	7.93	8.05	-1.08	0.4781	0.7921	9530068E07Rik	RIKEN cDNA 9530068E07 gene	Multiple_Complex
TC0900000221.mm.1	5.49	5.57	-1.06	0.9569	0.9879	9530077C05Rik	RIKEN cDNA 9530077C05 gene	Coding
TC1800001742.mm.1	5.73	5.8	-1.05	0.4453	0.773	9630014M24Rik; Arhgap26	RIKEN cDNA 9630014M24 gene; Rho GTPase activating protein 26	Multiple_Complex
TC0100003749.mm.1	4.94	4.88	1.04	0.8315	0.9468	9630028B13Rik	RIKEN cDNA 9630028B13 gene	Multiple_Complex
TC0900001279.mm.1	4.33	4.13	1.15	0.069	0.451	9630041A04Rik	RIKEN cDNA 9630041A04 gene	Coding
TC1700002223.mm.1	3.49	3.43	1.04	0.5686	0.8401	9830107B12Rik	RIKEN cDNA 9830107B12 gene	Coding
TC0700002931.mm.1	6.96	7.03	-1.05	0.4745	0.79	9830147E19Rik	RIKEN cDNA 9830147E19 gene	Multiple_Complex
TC1400002332.mm.1	4.28	4.17	1.07	0.1113	0.5079	9930012K11Rik	RIKEN cDNA 9930012K11 gene	Multiple_Complex
TC1900001347.mm.1	9.16	9.28	-1.09	0.1644	0.565	9930021J03Rik	RIKEN cDNA 9930021J03 gene	Multiple_Complex
TC1100001828.mm.1	4.62	4.51	1.07	0.3966	0.7443	9930022D16Rik	RIKEN cDNA 9930022D16 gene	Coding
TC1200001403.mm.1	3.82	3.57	1.19	0.0087	0.2962	9930038B18Rik	RIKEN cDNA 9930038B18 gene	Multiple_Complex
TC0400001432.mm.1	6.18	6.17	1.01	0.9576	0.9881	9930104L06Rik	RIKEN cDNA 9930104L06 gene	Multiple_Complex
TC1100004292.mm.1	5.52	5.47	1.04	0.1844	0.5836	9930111J21Rik1; 9930111J21Rik2	RIKEN cDNA 9930111J21 gene 1; RIKEN cDNA 9930111J21 gene 2 (9930111J21Rik2), mRNA.; RIKEN cDNA 9930111J21 gene 2	Coding
TC1100002648.mm.1	5.27	5.28	-1.01	0.4439	0.7719	9930111J21Rik2	RIKEN cDNA 9930111J21 gene 2	Coding
TC0200002357.mm.1	3.63	3.29	1.26	0.3815	0.7347	a	nonagouti	Coding
TC0200003096.mm.1	5.29	5.39	-1.07	0.3866	0.738	A130006I12Rik	RIKEN cDNA A130006I12 gene [Source:MGI Symbol;Acc:MGI:2441774]	Multiple_Complex
TC0100003873.mm.1	4.72	4.72	-1	0.9576	0.9881	A130010J15Rik	RIKEN cDNA A130010J15 gene	Multiple_Complex
TC0100001285.mm.1	9.85	9.13	1.64	0.0079	0.2876	A130050O07Rik	RIKEN cDNA A130050O07 gene	Multiple_Complex
TC1500002128.mm.1	3.84	3.55	1.22	0.0168	0.3396	A130051J06Rik	RIKEN cDNA A130051J0 gene	Multiple_Complex
TC0900002677.mm.1	3.18	2.92	1.2	0.103	0.4983	A130057D12Rik	RIKEN cDNA A130057D12 gene [Source:MGI Symbol;Acc:MGI:3642847]	Coding
TC0100001833.mm.1	3.55	3.51	1.03	0.5136	0.8123	A230020J21Rik	RIKEN cDNA A230020J21 gene	Multiple_Complex
TC1000001010.mm.1	11.29	11.53	-1.18	0.0193	0.3488	A230046K03Rik	RIKEN cDNA A230046K03 gene	Coding
TC0900000181.mm.1	7.62	7.68	-1.04	0.4484	0.7747	A230050P20Rik	RIKEN cDNA A230050P20 gene	Multiple_Complex
TC0800000772.mm.1	3.23	3.18	1.04	0.6152	0.8628	A230052G05Rik	RIKEN cDNA A230052G05 gene	Coding
TC0700003372.mm.1	9.9	9.92	-1.02	0.822	0.9431	A230057D06Rik; Mir344d-3	RIKEN cDNA A230057D06 gene; microRNA 344d-3; RIKEN cDNA A230057D06 gene (A230057D06Rik), non-coding RNA.	Multiple_Complex
TC1000002614.mm.1	4.49	4.47	1.01	0.3524	0.7152	A230060F14Rik	RIKEN cDNA A230060F14 gene [Source:MGI Symbol;Acc:MGI:3642156]	Coding
TC1200001235.mm.1	5.19	5.12	1.05	0.5287	0.8204	A230065H16Rik	RIKEN cDNA A230065H16 gene	Coding
TC0700003715.mm.1	4.69	4.48	1.15	0.0427	0.4043	A230065N10Rik	RIKEN cDNA A230065N10 gene [Source:MGI Symbol;Acc:MGI:3642744]	Coding
TC0800000101.mm.1	4.03	4.1	-1.05	0.9958	0.9987	A230072I06Rik	RIKEN cDNA A230072I06 gene	Coding
TC0600001435.mm.1	6.08	6.11	-1.02	0.5821	0.8462	A230083G16Rik	RIKEN cDNA A230083G16 gene	Coding
TC0800002600.mm.1	5.3	5.27	1.02	0.7946	0.9343	A230103J11Rik	RIKEN cDNA A230103J11 gene	Multiple_Complex
TC0800001162.mm.1	5.64	5.59	1.04	0.9942	0.9984	A330008L17Rik	RIKEN cDNA A330008L17 gene	Multiple_Complex
TC1700002197.mm.1	5.79	5.91	-1.09	0.3417	0.7081	A330017A19Rik	RIKEN cDNA A330017A19 gene	Coding
TC0100001883.mm.1	9.72	9.78	-1.04	0.2332	0.6276	A330023F24Rik; Mir29c; Mir29b-2	RIKEN cDNA A330023F24 gene; microRNA 29c; microRNA 29b-2	Multiple_Complex
TC0900001116.mm.1	5.33	5.24	1.07	0.7504	0.9173	A330041J22Rik	RIKEN cDNA A330041J22 gene	Multiple_Complex
TC1700001112.mm.1	6.9	7.15	-1.19	0.0153	0.3329	A330050F15Rik	RIKEN cDNA A330050F15 gene	Multiple_Complex
TC0500003320.mm.1	5.22	5.26	-1.03	0.7347	0.9112	A330070K13Rik	RIKEN cDNA A330070K13 gene	Coding
TC0700003387.mm.1	13.88	13.74	1.11	0.2257	0.6198	A330076H08Rik; Mir344g	RIKEN cDNA A330076H08 gene; microRNA 344g	Multiple_Complex
TC0400002034.mm.1	7.5	7.45	1.04	0.3762	0.7309	A430005L14Rik	RIKEN cDNA A430005L14 gene	Multiple_Complex
TC0600000785.mm.1	4.85	4.7	1.11	0.1033	0.4988	A430010J10Rik	RIKEN cDNA A430010J10 gene [Source:MGI Symbol;Acc:MGI:2442501]	Multiple_Complex
TC0500001662.mm.1	7.62	7.76	-1.1	0.1898	0.5885	A430033K04Rik	RIKEN cDNA A430033K04 gene	Coding
TC0600001848.mm.1	4.43	4.44	-1.01	0.7447	0.9151	A430035B10Rik	RIKEN cDNA A430035B10 gene	Multiple_Complex
TC1100003579.mm.1	4.59	4.71	-1.08	0.4822	0.7943	A430060F13Rik	RIKEN cDNA A430060F13 gene	Multiple_Complex
TC0800000003.mm.1	4.32	4.23	1.06	0.5153	0.813	A430078G23Rik	RIKEN cDNA A430078G23 gene	Multiple_Complex
TC5_JH584297_random00000001.mm.1	4.43	4.28	1.11	0.0501	0.4134	A430089I19Rik	RIKEN cDNA A430089I19 gene, mRNA (cDNA clone MGC:182539 IMAGE:9056433), complete cds.; RIKEN cDNA A430089I19 gene	Coding
TC5_JH584298_random00000003.mm.1	4.42	4.26	1.12	0.134	0.5316	A430089I19Rik	RIKEN cDNA A430089I19 gene (A430089I19Rik), mRNA.; RIKEN cDNA A430089I19 gene, mRNA (cDNA clone MGC:182539 IMAGE:9056433), complete cds.	Coding
TC0500002781.mm.1	4.77	4.61	1.12	0.1734	0.573	A430089I19Rik	RIKEN cDNA A430089I19 gene (A430089I19Rik), mRNA.; RIKEN cDNA A430089I19 gene	Coding
TC5_GL456354_random00000001.mm.1	4.53	4.3	1.17	0.0596	0.4348	A430089I19Rik	RIKEN cDNA A430089I19 gene (A430089I19Rik), mRNA.; RIKEN cDNA A430089I19 gene, mRNA (cDNA clone MGC:182539 IMAGE:9056433), complete cds.; RIKEN cDNA A430089I19 gene	Coding
TC0500002783.mm.1	4.44	4.26	1.14	0.0398	0.3985	A430089I19Rik; Gm3147	RIKEN cDNA A430089I19 gene, mRNA (cDNA clone MGC:182539 IMAGE:9056433), complete cds.; predicted gene 3147	Coding
TC0500002784.mm.1	4.42	4.26	1.12	0.134	0.5316	A430089I19Rik; Gm3176	RIKEN cDNA A430089I19 gene; RIKEN cDNA A430089I19 gene, mRNA (cDNA clone MGC:182539 IMAGE:9056433), complete cds.; predicted gene 3176	Coding
TC1900000209.mm.1	4.3	4.44	-1.1	0.8019	0.9368	A430093F15Rik	RIKEN cDNA A430093F15 gene	Multiple_Complex
TC0200004419.mm.1	5.82	5.85	-1.02	0.7661	0.9236	A430105I19Rik	RIKEN cDNA A430105I19 gene	Multiple_Complex
TC1200001259.mm.1	4.38	4.26	1.09	0.0739	0.4569	A530016L24Rik	RIKEN cDNA A530016L24 gene	Multiple_Complex
TC0700001196.mm.1	4.72	4.6	1.09	0.4475	0.7742	A530021J07Rik	Riken cDNA A530021J07 gene	Coding
TC0600002391.mm.1	4.02	3.96	1.04	0.6891	0.8938	A530053G22Rik	RIKEN cDNA A530053G22 gene	Multiple_Complex
TC1700002224.mm.1	4.05	3.84	1.16	0.0762	0.4609	A530064D06Rik	RIKEN cDNA A530064D06 gene	Coding
TC1300001746.mm.1	4.78	4.88	-1.07	0.554	0.8332	A530084C06Rik	RIKEN cDNA A530084C06 gene [Source:MGI Symbol;Acc:MGI:3704402]	Coding
TC1700000560.mm.1	6.2	5.9	1.23	0.2992	0.6802	A530088E08Rik	RIKEN cDNA A530088E08 gene	Multiple_Complex
TC1300001525.mm.1	3.74	3.7	1.03	0.9205	0.9763	A530099J19Rik	RIKEN cDNA A530099J19 gene	Coding
TC0100002729.mm.1	4.44	4.35	1.06	0.1662	0.5657	A630001G21Rik	RIKEN cDNA A630001G21 gene	Multiple_Complex
TC1600000183.mm.1	3.96	3.67	1.22	0.015	0.3329	A630010A05Rik	RIKEN cDNA A630010A05 gene	Multiple_Complex
TC1400001718.mm.1	4.03	3.77	1.2	0.0355	0.3894	A630023A22Rik	RIKEN cDNA A630023A22 gene	Coding
TC0X00001084.mm.1	4	3.76	1.18	0.0415	0.4016	A630033H20Rik	RIKEN cDNA A630033H20 gene	Coding
TC0600003284.mm.1	3.74	3.75	-1	0.4928	0.8007	A630073D07Rik	RIKEN cDNA A630073D07 gene	Multiple_Complex
TC0300001115.mm.1	3.39	3.41	-1.01	0.6651	0.8835	A630076J17Rik	RIKEN cDNA A630076J17 gene	Multiple_Complex
TC0700003782.mm.1	3.75	3.59	1.12	0.035	0.3879	A630091E08Rik	RIKEN cDNA A630091E08 gene	Coding
TC0900002034.mm.1	4.22	4.26	-1.03	0.7472	0.916	A630095E13Rik	RIKEN cDNA A630095E13 gene; Synthetic construct Mus musculus clone IMAGE:100016445, MGC:184563 RIKEN cDNA A630095E13 gene (A630095E13Rik) mRNA, encodes complete protein.	Multiple_Complex
TC0100002605.mm.1	3.4	3.31	1.07	0.1524	0.552	A630095N17Rik	RIKEN cDNA A630095N17 gene	Coding
TC0100002772.mm.1	7.71	7.81	-1.08	0.3486	0.7125	A730008H23Rik; Hjurp; 6430706D22Rik	RIKEN cDNA A730008H23 gene; Holliday junction recognition protein; RIKEN cDNA 6430706D22 gene; RIKEN cDNA 6430706D22 gene (6430706D22Rik), non-coding RNA.	Multiple_Complex
TC0100003828.mm.1	3.18	3.1	1.06	0.3549	0.7172	A730013G03Rik	RIKEN cDNA A730013G03 gene	Coding
TC0400003256.mm.1	4.57	4.91	-1.27	0.6263	0.8676	A730015C16Rik	RIKEN cDNA A730015C16 gene [Source:MGI Symbol;Acc:MGI:3704235]	Coding
TC1800000595.mm.1	5.6	5.48	1.09	0.384	0.7362	A730017C20Rik	RIKEN cDNA A730017C20 gene	Multiple_Complex
TC1200002428.mm.1	4.31	4.06	1.19	0.2967	0.6782	A730018C14Rik	RIKEN cDNA A730018C14 gene	Multiple_Complex
TC0300002842.mm.1	4.97	4.9	1.05	0.445	0.7728	A730020M07Rik	RIKEN cDNA A730020M07 gene	Multiple_Complex
TC0500002811.mm.1	4.36	4.42	-1.04	0.5958	0.8537	A730035I17Rik	RIKEN cDNA A730035I17 gene [Source:MGI Symbol;Acc:MGI:3696858]	Multiple_Complex
TC0900002458.mm.1	4.58	4.58	1.01	0.6471	0.8771	A730043L09Rik	RIKEN cDNA A730043L09 gene	Multiple_Complex
TC0800000302.mm.1	3.37	3.53	-1.12	0.943	0.9835	A730045E13Rik	RIKEN cDNA A730045E13 gene	Coding
TC0600001100.mm.1	3.93	3.86	1.05	0.3455	0.7102	A730049H05Rik	RIKEN cDNA A730049H05 gene	Multiple_Complex
TC1400002088.mm.1	4.43	4.36	1.05	0.2477	0.64	A730061H03Rik	RIKEN cDNA A730061H03 gene [Source:MGI Symbol;Acc:MGI:2445099]	Coding
TC1100000088.mm.1	4.77	4.63	1.1	0.7841	0.9308	A730071L15Rik	RIKEN cDNA A730071L15Rik gene [Source:MGI Symbol;Acc:MGI:3642498]	Coding
TC1800000738.mm.1	5.42	5.25	1.13	0.3009	0.6817	A730085E03Rik	PREDICTED: RIKEN cDNA A730085E03 gene (A730085E03Rik), miscRNA.; RIKEN cDNA A730085E03 gene	Multiple_Complex
TC1300000553.mm.1	5.33	5	1.26	0.4226	0.7603	A830005F24Rik	RIKEN cDNA A830005F24 gene	Coding
TC0500001079.mm.1	7.25	7.18	1.05	0.4896	0.7989	A830010M20Rik; 1700028K03Rik	RIKEN cDNA A830010M20 gene; RIKEN cDNA 1700028K03 gene	Multiple_Complex
TC0100000056.mm.1	5.7	5.39	1.25	0.005	0.2607	A830018L16Rik	RIKEN cDNA A830018L16 gene	Multiple_Complex
TC1900001434.mm.1	4.96	5.17	-1.15	0.6875	0.8933	A830019P07Rik	SubName: Full=Putative uncharacterized protein;	Multiple_Complex
TC1100002382.mm.1	4.58	4.54	1.03	0.1758	0.5747	A830031A19Rik	RIKEN cDNA A830031A19 gene	Multiple_Complex
TC1100003960.mm.1	3.87	3.89	-1.01	0.4325	0.766	A830035A12Rik	RIKEN cDNA A830035A12 gene	Multiple_Complex
TC0900000548.mm.1	4.91	4.76	1.11	0.563	0.8376	A830035O19Rik	RIKEN cDNA A830035O19 gene	Coding
TC0700003501.mm.1	5.51	5.67	-1.11	0.8458	0.9514	A830073O21Rik	RIKEN cDNA A830073O21 gene [Source:MGI Symbol;Acc:MGI:2443692]	Multiple_Complex
TC0X00001621.mm.1	7.34	7.34	-1	0.7943	0.9342	A830080D01Rik	RIKEN cDNA A830080D01 gene	Multiple_Complex
TC1000001990.mm.1	7.52	7.62	-1.07	0.5393	0.8255	A830082N09Rik	RIKEN cDNA A830082N09 gene; RIKEN cDNA A830082N09 gene (A830082N09Rik), non-coding RNA.	Multiple_Complex
TC0300000155.mm.1	5.11	5.13	-1.02	0.36	0.7203	A830092H15Rik	RIKEN cDNA A830092H15 gene [Source:MGI Symbol;Acc:MGI:3698881]	Multiple_Complex
TC1700002396.mm.1	3.96	4.11	-1.11	0.2627	0.6524	A930002H24Rik	RIKEN cDNA A930002H24 gene	Multiple_Complex
TC1600001335.mm.1	5.9	5.61	1.22	0.0263	0.3717	A930003A15Rik	RIKEN cDNA A930003A15 gene	Multiple_Complex
TC0200003026.mm.1	4.16	3.95	1.16	0.0517	0.4175	A930004D18Rik	RIKEN cDNA A930004D18 gene	Multiple_Complex
TC0300002799.mm.1	7.81	7.81	-1	0.9679	0.9908	A930005H10Rik	RIKEN cDNA A930005H10 gene	Multiple_Complex
TC1600000164.mm.1	4.02	3.9	1.08	0.3534	0.7159	A930007A09Rik	PREDICTED: RIKEN cDNA A930007A09 gene (A930007A09Rik), mRNA.	Multiple_Complex
TC1000001332.mm.1	5.82	5.41	1.33	0.0036	0.2503	A930009A15Rik	RIKEN cDNA A930009A15 gene	Coding
TC0500002819.mm.1	5.98	5.88	1.07	0.2074	0.6048	A930011G23Rik	RIKEN cDNA A930011G23 gene	Multiple_Complex
TC0700002482.mm.1	3.28	3.31	-1.02	0.3731	0.7289	A930016O22Rik	RIKEN cDNA A930016O22 gene	Multiple_Complex
TC1700001683.mm.1	6.58	6.28	1.23	0.2084	0.6056	A930017K11Rik	RIKEN cDNA A930017K11 gene	Coding
TC1500000356.mm.1	6.44	6.44	1	0.6794	0.8899	A930017M01Rik; 2310069G16Rik	Smg-5 homolog, nonsense mediated mRNA decay factor pseudogene; RIKEN cDNA 2310069G16 gene; RIKEN cDNA A930017M01 gene	Multiple_Complex
TC1400001991.mm.1	7.18	7.32	-1.1	0.1381	0.5366	A930018M24Rik	RIKEN cDNA A930018M24 gene	Multiple_Complex
TC0200001553.mm.1	5.28	5.28	-1	0.602	0.8565	A930018P22Rik	RIKEN cDNA A930018P22 gene	Coding
TC1000002338.mm.1	5.08	5.14	-1.05	0.568	0.8397	A930033H14Rik	RIKEN cDNA A930033H14 gene	Coding
TC0600002199.mm.1	5.52	5.57	-1.04	0.7621	0.9223	A930035D04Rik	RIKEN cDNA A930035D04 gene [Source:MGI Symbol;Acc:MGI:2445106]	Multiple_Complex
TC0100001388.mm.1	14.6	14.49	1.08	0.2625	0.6522	A930039A15Rik	RIKEN cDNA A930039A15 gene	Coding
TC0800000554.mm.1	4.89	4.86	1.02	0.8819	0.9637	AA386476	expressed sequence AA386476 [Source:MGI Symbol;Acc:MGI:3034595]	Multiple_Complex
TC1100000057.mm.1	5.72	5.37	1.28	0.0351	0.3881	AA413626	ribosomal protein L17 pseudogene	Multiple_Complex
TC0X00000156.mm.1	5.93	5.84	1.06	0.7279	0.9086	AA414768	expressed sequence AA414768	Multiple_Complex
TC1300000837.mm.1	3.86	3.9	-1.03	0.8025	0.937	AA414992	PREDICTED: expressed sequence AA414992 (AA414992), mRNA.	Coding
TC0400003430.mm.1	5.68	5.65	1.02	0.276	0.6632	AA415398	expressed sequence AA415398	Multiple_Complex
TC0200001854.mm.1	4.65	4.61	1.02	0.624	0.8665	AA467197; Mir147	expressed sequence AA467197; microRNA 147	Multiple_Complex
TC1000002030.mm.1	5.31	5.21	1.07	0.5002	0.8046	AA474331	expressed sequence AA474331	Multiple_Complex
TC0700004088.mm.1	9.46	9.52	-1.04	0.8633	0.9585	AA474408	expressed sequence AA474408	Coding
TC0900001363.mm.1	4.98	4.82	1.11	0.2083	0.6055	AA543401	myc-like oncogene, s-myc protein pseudogene	Multiple_Complex
TC0100002157.mm.1	4.18	4.14	1.03	0.8099	0.9401	AA619741	PHD finger protein 19 pseudogene; expressed sequence AA619741 (AA619741), non-coding RNA.	Multiple_Complex
TC1100003576.mm.1	4.29	3.96	1.25	0.1067	0.5031	AA623943	expressed sequence AA623943	Multiple_Complex
TC5_JH584296_random00000004.mm.1	3.99	3.89	1.07	0.3409	0.7076	AA792892	expressed sequence AA792892	Coding
TC0500000903.mm.1	4.65	4.53	1.09	0.1012	0.4962	AA792892; Gm6367; C87414; Gm6205	expressed sequence AA792892; predicted gene 6367 (Gm6367), non-coding RNA.; expressed sequence C87414; expressed sequence C87414, mRNA (cDNA clone MGC:91124 IMAGE:30476802), complete cds.; expressed sequence C87414, mRNA (cDNA clone MGC:103218 IMAGE:30477931), complete cds.; predicted gene 6367; predicted gene 6205	Multiple_Complex
TC0100001161.mm.1	5.84	5.41	1.34	0.253	0.6447	AA986860	expressed sequence AA986860	Coding
TC0400001724.mm.1	3.57	3.61	-1.03	0.7113	0.9019	AB041806; RP23-25C1.7	hypothetical protein, MNCb-2457 [Source:MGI Symbol;Acc:MGI:1931024]; novel protein	Coding
TC0900000199.mm.1	5.4	5.37	1.02	0.9294	0.9797	AB124611	cDNA sequence AB124611	Coding
TC4_GL456350_random00000008.mm.1	9.73	9.22	1.42	0.0237	0.363	AC087559.2	Protein Gm10597	Coding
TC0200001968.mm.1	4.1	4.07	1.02	0.2586	0.6491	AU015228	expressed sequence AU015228	Multiple_Complex
TC0X00000890.mm.1	3.52	3.35	1.13	0.2334	0.6278	AU015836	expressed sequence AU015836	Multiple_Complex
TC1700002404.mm.1	3.99	3.92	1.05	0.2273	0.6218	AU016765	expressed sequence AU016765	Multiple_Complex
TC0700002120.mm.1	3.85	3.7	1.12	0.1125	0.508	AU018091	expressed sequence AU018091	Coding
TC0900002272.mm.1	7.65	7.7	-1.04	0.4112	0.7537	AU019823	expressed sequence AU019823	Coding
TC1500001064.mm.1	3.47	3.7	-1.18	0.3859	0.7376	AU021063	expressed sequence AU021063; expressed sequence AU021063 (AU021063), non-coding RNA.	Multiple_Complex
TC1600001156.mm.1	4.36	4.35	1.01	0.4934	0.8009	AU021092	expressed sequence AU021092	Coding
TC0400004221.mm.1	7.28	7.27	1	0.5079	0.8085	AU022252	expressed sequence AU022252	Multiple_Complex
TC0X00001759.mm.1	4.13	4.26	-1.09	0.1677	0.5674	AU022751	expressed sequence AU022751	Coding
TC0400001472.mm.1	7.58	7.55	1.03	0.8043	0.9376	AU040320	expressed sequence AU040320	Multiple_Complex
TC1000000919.mm.1	7.67	7.4	1.2	0.5977	0.8549	AU041133	expressed sequence AU041133	Coding
TC0400002108.mm.1	7.07	7.35	-1.21	0.0298	0.3788	AW011738	expressed sequence AW011738	Multiple_Complex
TC1900001123.mm.1	4.82	5.33	-1.42	0.0018	0.2129	AW112010	expressed sequence AW112010	Multiple_Complex
TC0700004647.mm.1	5.12	5.34	-1.16	0.1002	0.4941	AW146154	expressed sequence AW146154	Multiple_Complex
TC1300000102.mm.1	6.53	6.7	-1.12	0.5193	0.8157	AW209491	expressed sequence AW209491	Coding
TC1500001145.mm.1	10.66	10.9	-1.18	0.1061	0.502	AW549877	expressed sequence AW549877	Coding
TC0900002083.mm.1	4.3	4.24	1.04	0.8643	0.959	AW551984	expressed sequence AW551984	Multiple_Complex
TC1800000209.mm.1	9.16	9.02	1.1	0.131	0.5286	AW554918	expressed sequence AW554918	Multiple_Complex
TC1700002100.mm.1	14.12	13.75	1.3	0.6958	0.8967	AY036118	cDNA sequence AY036118	Multiple_Complex
TC0900002326.mm.1	7.13	6.98	1.11	0.0538	0.4216	AY074887	cDNA sequence AY074887	Coding
TC1400000591.mm.1	4.51	4.54	-1.02	0.8623	0.9583	AY358078	cDNA sequence AY358078; Synthetic construct Mus musculus clone IMAGE:100063919, MGC:193386 cDNA sequence AY358078 (AY358078) mRNA, encodes complete protein.	Multiple_Complex
TC0200005241.mm.1	3.65	3.67	-1.01	0.5301	0.8214	AY702102	cDNA sequence AY702102	Coding
TC0800001851.mm.1	4.43	4.34	1.07	0.884	0.9646	AY761184	cDNA sequence AY761184	Coding
TC0800001835.mm.1	3.39	3.3	1.06	0.174	0.5736	AY761185	cDNA sequence AY761185; Synthetic construct Mus musculus clone IMAGE:100062098, MGC:190356 cDNA sequence AY761185 (AY761185) mRNA, encodes complete protein.; cDNA sequence AY761185 (AY761185), mRNA.	Coding
TC1400000815.mm.1	4.2	3.94	1.19	0.0241	0.3649	B020004C17Rik	RIKEN cDNA B020004C17 gene	Multiple_Complex
TC0400003158.mm.1	4.62	4.62	-1	0.9734	0.9927	B020004J07Rik	RIKEN cDNA B020004J07 gene	Coding
TC1300002753.mm.1	2.81	2.66	1.11	0.4279	0.7633	B020031M17Rik	RIKEN cDNA B020031M17 gene	Coding
TC1100001470.mm.1	5.51	6.05	-1.45	0.0714	0.4539	B130006D01Rik	RIKEN cDNA B130006D01 gene	Multiple_Complex
TC0700001033.mm.1	4.59	4.61	-1.01	0.8456	0.9513	B130024G19Rik	RIKEN cDNA B130024G19 gene	Multiple_Complex
TC0400002048.mm.1	4.57	4.46	1.08	0.3732	0.729	B230104I21Rik	RIKEN cDNA B230104I21 gene	Multiple_Complex
TC1100001551.mm.1	10.98	11.51	-1.44	0.0086	0.2955	B230217C12Rik	RIKEN cDNA B230217C12 gene	Multiple_Complex
TC1300000673.mm.1	11.51	11.62	-1.08	0.3577	0.7188	B230219D22Rik	RIKEN cDNA B230219D22 gene	Multiple_Complex
TC1600001093.mm.1	8.09	8.04	1.04	0.8633	0.9585	B230307C23Rik	RIKEN cDNA B230307C23 gene [Source:MGI Symbol;Acc:MGI:3643396]	Multiple_Complex
TC0800000649.mm.1	4.55	4.33	1.16	0.2712	0.6592	B230317F23Rik	RIKEN cDNA B230317F23 gene	Coding
TC0700000662.mm.1	5.64	5.58	1.04	0.2061	0.6038	B230322F03Rik	RIKEN cDNA B230322F03 gene [Source:MGI Symbol;Acc:MGI:3704291]	Coding
TC0700001872.mm.1	8.47	8.4	1.05	0.1328	0.5303	B230325K18Rik	RIKEN cDNA B230325K18 gene	Multiple_Complex
TC1700000858.mm.1	6.39	6.45	-1.04	0.5421	0.8268	B230354K17Rik	SubName: Full=Putative uncharacterized protein;	Multiple_Complex
TC1400002819.mm.1	5.32	5.37	-1.04	0.6901	0.8942	B230359F08Rik	RIKEN cDNA B230359F08 gene	Coding
TC1000001794.mm.1	4.32	4.44	-1.09	0.57	0.8408	B230364G03Rik	RIKEN cDNA B230364G03 gene [Source:MGI Symbol;Acc:MGI:3704350]	Coding
TC0500001547.mm.1	4.54	4.63	-1.06	0.7175	0.9045	B230377A18Rik	RIKEN cDNA B230377A18 gene	Multiple_Complex
TC0400001794.mm.1	6.6	6.34	1.19	0.0767	0.4616	B330016D10Rik	RIKEN cDNA B330016D10 gene	Multiple_Complex
TC1100000836.mm.1	4.64	4.43	1.16	0.3507	0.714	B430202K04Rik	RIKEN cDNA B430202K04 gene	Multiple_Complex
TC1200000151.mm.1	4.39	4.18	1.16	0.1188	0.5151	B430203G13Rik	RIKEN cDNA B430203G13 gene [Source:MGI Symbol;Acc:MGI:3642832]	Coding
TC1300001340.mm.1	5.33	5.24	1.06	0.5284	0.8204	B430218F22Rik	RIKEN cDNA B430218F22 gene [Source:MGI Symbol;Acc:MGI:3704413]	Coding
TC0300002064.mm.1	3.51	3.45	1.04	0.8096	0.94	B430305J03Rik	RIKEN cDNA B430305J03 gene [Source:MGI Symbol;Acc:MGI:3697707]	Multiple_Complex
TC1700000936.mm.1	3.8	3.7	1.07	0.2384	0.632	B430306N03Rik	RIKEN cDNA B430306N03 gene; Synthetic construct Mus musculus clone IMAGE:100062141, MGC:190380 RIKEN cDNA B430306N03 gene (B430306N03Rik) mRNA, encodes complete protein.	Multiple_Complex
TC0700004101.mm.1	3.89	3.8	1.06	0.5592	0.8359	B430319F04Rik	RIKEN cDNA B430319F04 gene	Coding
TC1000001209.mm.1	3.59	3.4	1.15	0.0309	0.381	B530045E10Rik	RIKEN cDNA B530045E10 gene [Source:MGI Symbol;Acc:MGI:2445145]	Multiple_Complex
TC0600001875.mm.1	9.01	9.12	-1.08	0.2599	0.6504	B630005N14Rik	RIKEN cDNA B630005N14 gene	Multiple_Complex
TC0X00000096.mm.1	8.34	8.4	-1.04	0.7098	0.9019	B630019K06Rik	novel protein similar to F-box and leucine-rich repeat protein 17 (Fbxl17); RIKEN cDNA B630019K06 gene	Multiple_Complex
TC1600000226.mm.1	5.16	5.37	-1.16	0.7357	0.9115	B830017H08Rik	RIKEN cDNA B830017H08 gene; RIKEN cDNA B830017H08 gene (B830017H08Rik), non-coding RNA.	Multiple_Complex
TC0400002083.mm.1	9.61	9.8	-1.14	0.3368	0.7046	B930041F14Rik	RIKEN cDNA B930041F14 gene	Multiple_Complex
TC0800000063.mm.1	5.64	5.71	-1.05	0.1999	0.5982	B930078G14Rik	RIKEN cDNA B930078G14 gene	Coding
TC1800000239.mm.1	3.02	2.99	1.02	0.2366	0.6304	B930094E09Rik	RIKEN cDNA B930094E09 gene [Source:MGI Symbol;Acc:MGI:3603750]	Coding
TC0800001764.mm.1	3.02	2.86	1.12	0.9193	0.976	BB014433	expressed sequence BB014433	Multiple_Complex
TC1000000523.mm.1	3.82	3.74	1.05	0.7527	0.9185	BB019430	expressed sequence BB019430	Multiple_Complex
TC1200000883.mm.1	4.35	4.19	1.12	0.4819	0.7941	BB287469	expressed sequence BB287469 (BB287469), mRNA.; expressed sequence BB287469	Coding
TC1300002529.mm.1	4.24	4.05	1.14	0.6477	0.8774	BC001981	cDNA sequence BC001981 [Source:MGI Symbol;Acc:MGI:3704411]	Coding
TC1700000190.mm.1	8.27	8.21	1.04	0.5144	0.8126	BC002059	cDNA sequence BC002059	Multiple_Complex
TC1600000620.mm.1	9.47	9.03	1.35	0.0152	0.3329	BC002163	NADH dehydrogenase Fe-S protein 5 pseudogene; cDNA sequence BC002163	Multiple_Complex
TC0300000133.mm.1	3.18	3.16	1.01	0.5581	0.8354	BC002189	cDNA sequence BC002189	Coding
TC0100003239.mm.1	8.66	8.79	-1.09	0.2079	0.6052	BC003331	cDNA sequence BC003331	Multiple_Complex
TC1700000365.mm.1	6.78	6.89	-1.08	0.5139	0.8123	BC003965	cDNA sequence BC003965	Coding
TC1700000500.mm.1	8.27	8.38	-1.08	0.1071	0.5034	BC004004	cDNA sequence BC004004	Multiple_Complex
TC1300000278.mm.1	13.38	13.36	1.02	0.7016	0.8992	BC005537	cDNA sequence BC005537	Multiple_Complex
TC0500001028.mm.1	9.12	9.02	1.07	0.2119	0.6085	BC005561	cDNA sequence BC005561	Coding
TC0200003281.mm.1	11.08	11.07	1.01	0.9212	0.9766	BC005624	cDNA sequence BC005624	Multiple_Complex
TC1100004023.mm.1	3.95	3.97	-1.01	0.7975	0.9353	BC006965	cDNA sequence BC006965; cDNA sequence BC006965 (BC006965), non-coding RNA.	Multiple_Complex
TC1600001660.mm.1	3.95	3.87	1.06	0.4177	0.7576	BC016579	cDNA sequence, BC016579	Coding
TC0700004361.mm.1	6.65	6.71	-1.04	0.4736	0.7893	BC017158; Mir3103	cDNA sequence BC017158; microRNA 3103	Multiple_Complex
TC1100004249.mm.1	5.65	5.78	-1.09	0.2027	0.6012	BC017643	cDNA sequence BC017643	Multiple_Complex
TC1900000898.mm.1	3.85	3.83	1.01	0.325	0.698	BC021614	cDNA sequence BC021614	Coding
TC0300002451.mm.1	5.51	5.43	1.06	0.3286	0.7003	BC021767	cingulin pseudogene; cDNA sequence BC021767	Multiple_Complex
TC1000002032.mm.1	3.88	3.85	1.02	0.5626	0.8375	BC021785; G630090E17Rik	cDNA sequence BC021785; RIKEN cDNA G630090E17 gene	Coding
TC0800001569.mm.1	4.36	4.21	1.11	0.7785	0.9283	BC021891	cDNA sequence BC021891	Coding
TC1200001273.mm.1	5.56	5.53	1.02	0.8916	0.967	BC022687	cDNA sequence BC022687	Coding
TC0X00001707.mm.1	8.08	8.09	-1	0.5815	0.8459	BC022960	cDNA sequence BC022960	Multiple_Complex
TC1800000612.mm.1	4.68	4.5	1.13	0.0296	0.3778	BC023105	cDNA sequence BC023105	Multiple_Complex
TC0X00002393.mm.1	9.21	9.4	-1.14	0.0256	0.3693	BC023829	cDNA sequence BC023829	Multiple_Complex
TC1500001765.mm.1	4.54	4.39	1.11	0.2646	0.6539	BC024139; Eppk1	cDNA sequence BC024139; epiplakin 1; epiplakin 1 (Eppk1), mRNA.	Multiple_Complex
TC1200000173.mm.1	5.71	5.67	1.03	0.4987	0.8036	BC024416; LOC100861711	predicted gene, EG668525, mRNA (cDNA clone IMAGE:4988668).; PREDICTED: zinc finger protein 120-like, transcript variant 1 (LOC100861711), mRNA.; PREDICTED: zinc finger protein 120-like, transcript variant 2 (LOC100861711), mRNA.	Multiple_Complex
TC0700000451.mm.1	6.96	7.01	-1.03	0.5536	0.833	BC024978; Mir1191	cDNA sequence BC024978; microRNA 1191	Multiple_Complex
TC1500000554.mm.1	4.1	3.93	1.13	0.3139	0.6912	BC025446	cDNA sequence BC025446	Coding
TC1000000905.mm.1	5.95	6	-1.03	0.5192	0.8156	BC025920	zinc finger protein pseudogene	Multiple_Complex
TC0100001433.mm.1	6.45	6.58	-1.09	0.0518	0.4177	BC026585	cDNA sequence BC026585	Coding
TC1700002502.mm.1	4.03	3.96	1.05	0.804	0.9375	BC027072	cDNA sequence BC027072	Coding
TC0300002490.mm.1	6.21	6.18	1.02	0.6754	0.8885	BC028528	cDNA sequence BC028528	Multiple_Complex
TC0200003148.mm.1	7.28	7.37	-1.06	0.7029	0.8997	BC029214	cDNA sequence BC029214	Multiple_Complex
TC0700001733.mm.1	9.94	10.22	-1.21	0.0564	0.4291	BC030336	cDNA sequence BC030336	Multiple_Complex
TC1100001154.mm.1	5.51	5.48	1.02	0.3997	0.7465	BC030499	cDNA sequence BC030499	Multiple_Complex
TC0800000638.mm.1	4.34	4.22	1.09	0.0837	0.4705	BC030500	cDNA sequence BC030500	Coding
TC1100001684.mm.1	4.03	4.06	-1.02	0.6558	0.8806	BC030867	cDNA sequence BC030867	Multiple_Complex
TC0800002322.mm.1	3.37	3.29	1.06	0.2189	0.6137	BC030870	cDNA sequence BC030870	Multiple_Complex
TC1800000801.mm.1	9.35	9.31	1.03	0.5877	0.8495	BC031181	cDNA sequence BC031181	Coding
TC0100003302.mm.1	4.57	4.51	1.04	0.643	0.8763	BC034090	cDNA sequence BC034090	Multiple_Complex
TC0600003216.mm.1	4.04	4.15	-1.08	0.6399	0.875	BC035044	cDNA sequence BC035044; cDNA sequence BC035044 (BC035044), transcript variant 2, mRNA.	Coding
TC0100002633.mm.1	3.47	3.47	-1	0.9119	0.9739	BC035947	cDNA sequence BC035947	Coding
TC0500003477.mm.1	7.51	7.57	-1.04	0.4879	0.7978	BC037034	cDNA sequence BC037034	Multiple_Complex
TC0500000801.mm.1	4.49	4.7	-1.16	0.5879	0.8495	BC037156	cDNA sequence BC037156	Coding
TC0900002878.mm.1	3.84	3.86	-1.01	0.3793	0.7331	BC043934	cDNA sequence BC043934	Multiple_Complex
TC1000001498.mm.1	6.19	6.32	-1.09	0.0897	0.4793	BC048403	cDNA sequence BC048403	Multiple_Complex
TC1500002321.mm.1	3.91	3.66	1.19	0.5578	0.8353	BC048502	cDNA sequence BC048502	Coding
TC1300000833.mm.1	5.13	5.19	-1.04	0.508	0.8085	BC048507	cDNA sequence BC048507	Coding
TC0600003208.mm.1	3.61	3.51	1.07	0.1748	0.5742	BC048546	cDNA sequence BC048546	Multiple_Complex
TC0900001405.mm.1	3.56	3.6	-1.02	0.8683	0.9601	BC048562	cDNA sequence BC048562	Coding
TC1900000098.mm.1	5.05	4.93	1.09	0.9746	0.9931	BC048609	cDNA sequence BC048609	Coding
TC0800001475.mm.1	3.7	3.42	1.21	0.2031	0.6018	BC048644	cDNA sequence BC048644	Multiple_Complex
TC0600001070.mm.1	3.9	3.86	1.03	0.7436	0.9146	BC048671	cDNA sequence BC048671	Coding
TC0700003610.mm.1	4.85	4.76	1.07	0.2543	0.646	BC048679	cDNA sequence BC048679	Coding
TC0900000537.mm.1	3.79	3.67	1.09	0.4748	0.7901	BC049352	cDNA sequence BC049352	Multiple_Complex
TC0X00001916.mm.1	3.3	3.28	1.01	0.12	0.5167	BC049702	cDNA sequence BC049702	Coding
TC0600001629.mm.1	3.81	3.88	-1.05	0.5856	0.8483	BC049715	cDNA sequence BC049715	Multiple_Complex
TC0700000395.mm.1	3.69	3.67	1.01	0.6927	0.8954	BC049730	cDNA sequence BC049730	Coding
TC1100002690.mm.1	3.48	3.34	1.1	0.6352	0.8725	BC049762	cDNA sequence BC049762	Coding
TC0700004078.mm.1	5.09	5.05	1.03	0.5762	0.8441	BC051019	cDNA sequence BC051019	Coding
TC0500000803.mm.1	3.08	3.12	-1.03	0.308	0.6868	BC051076	cDNA sequence BC051076	Coding
TC1700000632.mm.1	5.63	5.6	1.02	0.514	0.8124	BC051142	cDNA sequence BC051142	Multiple_Complex
TC0200002815.mm.1	4.32	4.27	1.04	0.9559	0.9876	BC051628	cDNA sequence BC051628	Multiple_Complex
TC1300002138.mm.1	4.19	4	1.14	0.1499	0.5493	BC051665	cDNA sequence BC051665	Coding
TC0200001700.mm.1	6.4	6.47	-1.05	0.2237	0.6179	BC052040	cDNA sequence BC052040	Multiple_Complex
TC1100000480.mm.1	3.51	3.4	1.08	0.7876	0.932	BC053393	cDNA sequence BC053393	Coding
TC0100003416.mm.1	5.85	5.87	-1.02	0.8928	0.9673	BC055324	cDNA sequence BC055324	Multiple_Complex
TC1400000466.mm.1	4.52	4.18	1.27	0.0056	0.2674	BC061237	cDNA sequence BC061237	Coding
TC0600001524.mm.1	5.13	4.96	1.13	0.0398	0.3983	BC064078	cDNA sequence BC064078	Multiple_Complex
TC0X00001336.mm.1	6.13	5.94	1.14	0.0839	0.4709	BC065397	cDNA sequence BC065397	Multiple_Complex
TC1300001287.mm.1	3.96	4.14	-1.13	0.0384	0.396	BC067074	cDNA sequence BC067074	Coding
TC1200000037.mm.1	6.72	6.82	-1.07	0.3014	0.6821	BC068281	cDNA sequence BC068281	Multiple_Complex
TC0400001831.mm.1	3.9	3.73	1.12	0.4341	0.7671	BC080695; Gm13057; Gm13040	cDNA sequence BC080695; predicted gene 13057 (Gm13057), mRNA.; predicted gene 13040 (Gm13040), mRNA.; predicted gene 13057	Coding
TC0100003722.mm.1	5.01	4.97	1.03	0.7786	0.9283	BC085271	protein phosphatase 2A inhibitor-2 I-2PP2A-related	Coding
TC0700002691.mm.1	4.46	4.51	-1.03	0.6983	0.8976	BC089491	cDNA sequence BC089491	Coding
TC1000001576.mm.1	4.77	4.56	1.16	0.1297	0.5272	BC089597	cDNA sequence BC089597	Coding
TC0100003590.mm.1	4.03	3.96	1.05	0.8528	0.9546	BC094916	cDNA sequence BC094916	Coding
TC1100004158.mm.1	4.69	4.59	1.07	0.5005	0.8047	BC100451	cDNA sequence BC100451	Coding
TC1600001573.mm.1	3.72	3.66	1.04	0.3256	0.6984	BC100530; BC117090; Stfa3	cDNA sequence BC100530; cDNA sequence BC1179090, mRNA (cDNA clone MGC:151441 IMAGE:40126383), complete cds.; cDNA sequence BC1179090, mRNA (cDNA clone MGC:151467 IMAGE:40126409), complete cds.; stefin A3	Multiple_Complex
TC1600001393.mm.1	3.48	3.4	1.06	0.9811	0.9949	BC106179	cDNA sequence BC106179	Coding
TC0300002513.mm.1	4.82	4.69	1.1	0.17	0.5698	BC107364	cDNA sequence BC107364	Coding
TC1600001572.mm.1	4.04	3.91	1.09	0.3231	0.6971	BC117090	cDNA sequence BC1179090; Synthetic construct Mus musculus clone IMAGE:100069443, MGC:199345 cDNA sequence BC1179090 (BC117090) mRNA, encodes complete protein.	Coding
TC1300001366.mm.1	3.68	3.65	1.02	0.3156	0.6923	BC147527	cDNA sequence BC147527	Coding
TC1000002752.mm.1	3.84	3.67	1.12	0.722	0.9062	C030005K15Rik	RIKEN cDNA C030005K15 gene	Coding
TC1500001790.mm.1	6.74	6.8	-1.04	0.3571	0.7187	C030006K11Rik; Lrrc24	RIKEN cDNA C030006K11 gene; leucine rich repeat containing 24	Multiple_Complex
TC1700001111.mm.1	6.45	6.47	-1.01	0.818	0.9421	C030034I22Rik	RIKEN cDNA C030034I22 gene	Multiple_Complex
TC0800001757.mm.1	2.93	2.88	1.03	0.5109	0.8108	C030037F17Rik	RIKEN cDNA C030037F17 gene [Source:MGI Symbol;Acc:MGI:1924725]	Coding
TC0700000467.mm.1	6.2	6.17	1.02	0.741	0.9134	C030039L03Rik	RIKEN cDNA C030039L03 gene	Multiple_Complex
TC0200003184.mm.1	4.66	4.61	1.04	0.4869	0.7972	C030048H21Rik	RIKEN cDNA C030048H21 gene	Multiple_Complex
TC0200001601.mm.1	5.46	4.82	1.56	0.3716	0.7282	C130023O10Rik	RIKEN cDNA C130023O10 gene; PREDICTED: RIKEN cDNA C130023O10 gene (C130023O10Rik), miscRNA.	Multiple_Complex
TC0100002707.mm.1	4.65	4.59	1.04	0.3365	0.7043	C130026I21Rik; A530032D15Rik	RIKEN cDNA C130026I21 gene; RIKEN cDNA A530032D15Rik gene	Multiple_Complex
TC0500001168.mm.1	4.22	4.17	1.04	0.1924	0.5905	C130026L21Rik	RIKEN cDNA C130026L21 gene	Multiple_Complex
TC0900001516.mm.1	5.27	5.2	1.05	0.6277	0.8684	C130032M10Rik	RIKEN cDNA C130032M10 gene [Source:MGI Symbol;Acc:MGI:3642482]	Coding
TC1700000462.mm.1	4.29	4.18	1.08	0.1913	0.5898	C130040N14Rik	RIKEN cDNA C130040N14 gene	Coding
TC0500001674.mm.1	4.76	4.89	-1.09	0.2994	0.6805	C130050O18Rik	RIKEN cDNA C130050O18 gene	Coding
TC0600000763.mm.1	4.2	4.14	1.05	0.7666	0.9237	C130060K24Rik	RIKEN cDNA C130060K24 gene	Coding
TC1300000978.mm.1	10.28	10.02	1.2	0.014	0.3274	C130071C03Rik; Mir9-2	RIKEN cDNA C130071C03 gene; microRNA 9-2	Multiple_Complex
TC0400003160.mm.1	3.55	3.34	1.15	0.0773	0.4625	C130073F10Rik	RIKEN cDNA C130073F10 gene	Coding
TC0100003742.mm.1	4.82	4.84	-1.02	0.8862	0.9653	C130074G19Rik	RIKEN cDNA C130074G19 gene	Coding
TC0300000479.mm.1	3.7	3.63	1.05	0.162	0.5619	C130079G13Rik	RIKEN cDNA C130079G13 gene	Coding
TC0X00000557.mm.1	11.8	11.8	1	0.7952	0.9344	C230004F18Rik	RIKEN cDNA C230004F18 gene; RIKEN cDNA C230004F18 gene (C230004F18Rik), non-coding RNA.	Multiple_Complex
TC0100000360.mm.1	5.66	5.43	1.17	0.0445	0.4043	C230029F24Rik	RIKEN cDNA C230029F24 gene	Coding
TC0700000542.mm.1	5.12	5.08	1.03	0.2412	0.6343	C230062I16Rik	RIKEN cDNA C230062I16 gene	Multiple_Complex
TC1700001220.mm.1	4.82	4.88	-1.04	0.7446	0.9151	C230072F16Rik	PREDICTED: RIKEN cDNA C230072F16 gene (C230072F16Rik), mRNA.	Multiple_Complex
TC0700003126.mm.1	12.2	12.18	1.02	0.552	0.8323	C230091D08Rik	RIKEN cDNA C230091D08 gene; RIKEN cDNA C230091D08 gene (C230091D08Rik), non-coding RNA.	Multiple_Complex
TC0200003177.mm.1	7.07	7.15	-1.06	0.3974	0.7448	C330006A16Rik	RIKEN cDNA C330006A16 gene	Multiple_Complex
TC0X00002050.mm.1	8.65	8.64	1.01	0.6596	0.8817	C330007P06Rik	RIKEN cDNA C330007P06 gene	Multiple_Complex
TC0800002568.mm.1	2.86	2.8	1.04	0.3932	0.7424	C330011M18Rik	RIKEN cDNA C330011M18 gene	Coding
TC0200005377.mm.1	8.72	8.78	-1.04	0.3384	0.7056	C330013J21Rik	RIKEN cDNA C330013J21 gene	Coding
TC1800001375.mm.1	6.21	6.29	-1.05	0.739	0.9127	C330018D20Rik	RIKEN cDNA C330018D20 gene	Multiple_Complex
TC0800001911.mm.1	6.82	6.41	1.34	0.0177	0.3432	C330021F23Rik	RIKEN cDNA C330021F23 gene	Coding
TC0800000012.mm.1	4.15	4.14	1.01	0.3753	0.7305	C330021F23Rik	RIKEN cDNA C330021F23 gene	Multiple_Complex
TC1600000700.mm.1	4.95	4.97	-1.01	0.5636	0.8379	C330027C09Rik	RIKEN cDNA C330027C09 gene	Multiple_Complex
TC0500000726.mm.1	5.55	5.55	-1	0.7333	0.9107	C530008M17Rik	RIKEN cDNA C530008M17 gene	Multiple_Complex
TC0200004824.mm.1	4.38	4.1	1.21	0.3514	0.7145	C530025M09Rik	RIKEN cDNA C530025M09 gene [Source:MGI Symbol;Acc:MGI:2442090]	Coding
TC1100000349.mm.1	13.93	14.42	-1.41	0.311	0.689	C530030P08Rik	RIKEN cDNA C530030P08 gene	Multiple_Complex
TC0400003875.mm.1	3.99	3.75	1.18	0.1847	0.5841	C630004L07Rik	RIKEN cDNA C630004L07 gene	Coding
TC0200000081.mm.1	5.33	5.44	-1.08	0.3069	0.6861	C630004M23Rik	RIKEN cDNA C630004M23 gene	Coding
TC0800001264.mm.1	4.71	4.7	1.01	0.3353	0.7035	C630050I24Rik	RIKEN cDNA C630050I24 gene	Coding
TC1500000874.mm.1	5.2	4.96	1.18	0.3884	0.7392	C730034F03Rik	RIKEN cDNA C730034F03 gene [Source:MGI Symbol;Acc:MGI:2441921]	Coding
TC0400003587.mm.1	6.22	6.11	1.08	0.2376	0.6315	C77080	expressed sequence C77080	Coding
TC0X00002794.mm.1	6.03	6.07	-1.03	0.4965	0.8025	C77370	expressed sequence C77370; Synthetic construct Mus musculus clone IMAGE:100063567, MGC:191095 expressed sequence C77370 (C77370) mRNA, encodes complete protein.	Multiple_Complex
TC5_JH584299_random00000004.mm.1	4.21	4.11	1.07	0.4746	0.79	C87414	expressed sequence C87414	Coding
TC0500002778.mm.1	4.82	4.57	1.19	0.149	0.5486	C87414	expressed sequence C87414	Multiple_Complex
TC0600000989.mm.1	6.9	7.02	-1.09	0.5107	0.8106	C87436	expressed sequence C87436	Multiple_Complex
TC0400003008.mm.1	3.69	3.63	1.04	0.635	0.8724	C87499	expressed sequence C87499	Multiple_Complex
TC0400003937.mm.1	4.52	4.41	1.08	0.5507	0.8314	C87977	expressed sequence C87977	Multiple_Complex
TC1000000178.mm.1	4.42	4.31	1.08	0.4987	0.8036	C920009B18Rik	RIKEN cDNA C920009B18 gene; RIKEN cDNA C920009B18 gene	Multiple_Complex
TC0300000913.mm.1	4.88	4.92	-1.03	0.6945	0.896	C920021L13Rik	RIKEN cDNA C920021L13 gene	Multiple_Complex
TC1700002820.mm.1	4.88	4.86	1.01	0.7868	0.9319	C920025E04Rik; H2-T9	RIKEN cDNA C920025E04 gene; histocompatibility 2, T region locus 9 (H2-T9), mRNA	Multiple_Complex
TC1900000325.mm.1	5.59	5.59	-1.01	0.4754	0.7905	D030056L22Rik	RIKEN cDNA D030056L22 gene	Coding
TC0900001126.mm.1	2.99	3.04	-1.04	0.7814	0.9295	D030062O11Rik	RIKEN cDNA D030062O11 gene	Coding
TC1000002442.mm.1	10.4	10.68	-1.21	0.0139	0.3274	D10Jhu81e	DNA segment, Chr 10, Johns Hopkins University 81 expressed	Coding
TC1000000940.mm.1	7.96	8.08	-1.09	0.1045	0.4997	D10Wsu102e	DNA segment, Chr 10, Wayne State University 102, expressed	Coding
TC1100003301.mm.1	5.08	4.94	1.1	0.7206	0.9055	D11Bhm181e	DNA segment, Chr 11, Boehm 181, expressed [Source:MGI Symbol;Acc:MGI:106813]	Multiple_Complex
TC1100001863.mm.1	6.18	6.17	1	0.3001	0.6809	D11Wsu47e	DNA segment, Chr 11, Wayne State University 47, expressed	Coding
TC0400003494.mm.1	7.89	7.98	-1.06	0.5511	0.8317	D130007C19Rik	RIKEN cDNA D130007C19 gene [Source:MGI Symbol;Acc:MGI:3045257]	Multiple_Complex
TC0800000714.mm.1	7.81	7.86	-1.03	0.7256	0.9077	D130040H23Rik	RIKEN cDNA D130040H23 gene; Synthetic construct Mus musculus clone IMAGE:100069461, MGC:199363 RIKEN cDNA D130040H23 gene (D130040H23Rik) mRNA, encodes complete protein.	Coding
TC1300000281.mm.1	5.34	5.25	1.06	0.8382	0.949	D130043K22Rik	RIKEN cDNA D130043K22 gene	Multiple_Complex
TC1100000357.mm.1	3.78	3.64	1.11	0.3561	0.7179	D130052B06Rik	RIKEN cDNA D130052B06 gene	Multiple_Complex
TC0100000868.mm.1	4.11	4.27	-1.12	0.7701	0.9251	D130058E05Rik; RP23-118M14.1	RIKEN cDNA D130058E05 gene [Source:MGI Symbol;Acc:MGI:2444614]; novel protein	Multiple_Complex
TC0400000255.mm.1	5.68	5.65	1.02	0.294	0.6764	D130062J21Rik	RIKEN cDNA D130062J21 gene	Coding
TC1300002759.mm.1	3.97	3.99	-1.01	0.1926	0.5907	D13Ertd608e; Gm21762	DNA segment, Chr 13, ERATO Doi 608, expressed, mRNA (cDNA clone MGC:182237 IMAGE:9056131), complete cds.; DNA segment, Chr 13, ERATO Doi 608, expressed, mRNA (cDNA clone MGC:182226 IMAGE:9056120), complete cds.; predicted gene, 21762	Coding
TC1300001357.mm.1	3.79	3.65	1.09	0.2131	0.6095	D13Ertd608e; Gm21762	DNA segment, Chr 13, ERATO Doi 608, expressed; predicted gene, 21762	Coding
TC1500000417.mm.1	9.76	10.06	-1.24	0.0326	0.3851	D15Ertd621e	DNA segment, Chr 15, ERATO Doi 621, expressed	Coding
TC1600001944.mm.1	6.41	6.33	1.06	0.2277	0.6221	D16Ertd472e	DNA segment, Chr 16, ERATO Doi 472, expressed	Multiple_Complex
TC1700000669.mm.1	6.69	6.65	1.03	0.461	0.782	D17H6S53E	DNA segment, Chr 17, human D6S53E	Multiple_Complex
TC1700001938.mm.1	5.89	5.94	-1.03	0.442	0.7714	D17H6S56E-5	DNA segment, Chr 17, human D6S56E 5	Coding
TC1700001744.mm.1	10.73	11.13	-1.33	0.0029	0.237	D17Wsu92e	DNA segment, Chr 17, Wayne State University 92, expressed	Multiple_Complex
TC0100002863.mm.1	7.39	7.31	1.06	0.2349	0.6288	D1Ertd622e	DNA segment, Chr 1, ERATO Doi 622, expressed	Coding
TC0100001801.mm.1	3.85	3.84	1.01	0.5795	0.8454	D1Pas1	DNA segment, Chr 1, Pasteur Institute 1	Coding
TC0800001207.mm.1	8.9	9.06	-1.11	0.0746	0.4578	D230025D16Rik	RIKEN cDNA D230025D16 gene	Multiple_Complex
TC0200003264.mm.1	7.28	7.42	-1.1	0.2469	0.6391	D2Wsu81e	DNA segment, Chr 2, Wayne State University 81, expressed	Multiple_Complex
TC0600001343.mm.1	4.53	4.45	1.06	0.697	0.8971	D330020A13Rik	RIKEN cDNA D330020A13 gene [Source:MGI Symbol;Acc:MGI:3642762]	Coding
TC0X00001370.mm.1	3.77	3.69	1.06	0.3058	0.6852	D330045A20Rik	RIKEN cDNA D330045A20 gene	Multiple_Complex
TC0300000266.mm.1	8.71	8.91	-1.15	0.1665	0.566	D3Ertd254e	DNA segment, Chr 3, ERATO Doi 254, expressed	Multiple_Complex
TC0300000323.mm.1	8.22	8.26	-1.02	0.835	0.948	D3Ertd751e	DNA segment, Chr 3, ERATO Doi 751, expressed	Coding
TC1200001064.mm.1	4.29	4.37	-1.06	0.5104	0.8104	D430019H16Rik	RIKEN cDNA D430019H16 gene	Multiple_Complex
TC1200002497.mm.1	4.36	4.32	1.03	0.8652	0.9591	D430020J02Rik	RIKEN cDNA D430020J02 gene; RIKEN cDNA D430020J02 gene (D430020J02Rik), non-coding RNA.	Multiple_Complex
TC0200004238.mm.1	10.35	10.21	1.1	0.1429	0.5419	D430041D05Rik	RIKEN cDNA D430041D05 gene	Multiple_Complex
TC0700001795.mm.1	5.73	5.74	-1.01	0.6062	0.8587	D430042O09Rik	RIKEN cDNA D430042O09 gene	Multiple_Complex
TC0500003728.mm.1	9.31	9.39	-1.06	0.3626	0.7222	D5Ertd579e	DNA segment, Chr 5, ERATO Doi 579, expressed; DNA segment, Chr 5, ERATO Doi 579, expressed (D5Ertd579e), mRNA.	Multiple_Complex
TC0500002340.mm.1	3.77	3.73	1.02	0.9457	0.9843	D5Ertd615e	DNA segment, Chr 5, ERATO Doi 615, expressed [Source:MGI Symbol;Acc:MGI:1277236]	Multiple_Complex
TC0300001527.mm.1	3.76	3.71	1.03	0.7441	0.9149	D630002J18Rik	RIKEN cDNA D630002J18 gene	Coding
TC0200005031.mm.1	4.71	4.62	1.06	0.3912	0.7411	D630003M21Rik	RIKEN cDNA D630003M21 gene	Coding
TC0800001715.mm.1	3.23	3.32	-1.07	0.3346	0.7034	D630011A20Rik	RIKEN cDNA D630011A20 gene [Source:MGI Symbol;Acc:MGI:3642132]; RIKEN cDNA D630011A20 gene	Coding
TC0100003881.mm.1	4.46	4.5	-1.03	0.986	0.9961	D630023F18Rik	RIKEN cDNA D630023F18 gene	Coding
TC1000000612.mm.1	6.62	6.55	1.05	0.8047	0.9377	D630028G08Rik	RIKEN cDNA D630028G08 gene	Multiple_Complex
TC0900000485.mm.1	5.26	5.26	1.01	0.8048	0.9378	D630033O11Rik	RIKEN cDNA D630033O11 gene	Multiple_Complex
TC1200001648.mm.1	4.63	4.55	1.06	0.5465	0.8293	D630036H23Rik	RIKEN cDNA D630036H23 gene [Source:MGI Symbol;Acc:MGI:3704386]	Coding
TC0400002729.mm.1	4.76	4.8	-1.03	0.7165	0.9042	D630039A03Rik	RIKEN cDNA D630039A03 gene	Coding
TC0700002158.mm.1	6.11	6.3	-1.14	0.0682	0.4494	D630041G03Rik	RIKEN cDNA D630041G03 gene; RIKEN cDNA D630041G03 gene (D630041G03Rik), non-coding RNA.	Multiple_Complex
TC1700000398.mm.1	5.57	5.59	-1.01	0.684	0.8918	D630044L22Rik	RIKEN cDNA gene D630044L22 gene	Coding
TC0600003539.mm.1	8.26	8.09	1.13	0.1187	0.515	D630045J12Rik	RIKEN cDNA D630045J12 gene	Multiple_Complex
TC0600001003.mm.1	4.93	5.18	-1.19	0.0614	0.438	D6Ertd527e	DNA segment, Chr 6, ERATO Doi 527, expressed	Coding
TC0600001474.mm.1	9.41	9.56	-1.11	0.4895	0.7988	D6Wsu163e	DNA segment, Chr 6, Wayne State University 163, expressed	Multiple_Complex
TC1500001719.mm.1	4.37	4.42	-1.04	0.6469	0.8771	D730001G18Rik	RIKEN cDNA D730001G18 gene; RIKEN cDNA D730001G18 gene (D730001G18Rik), transcript variant 1, non-coding RNA.; RIKEN cDNA D730001G18 gene (D730001G18Rik), transcript variant 2, non-coding RNA.	Multiple_Complex
TC0500003703.mm.1	4.38	4.36	1.01	0.9527	0.9866	D730045B01Rik	RIKEN cDNA D730045B01 gene [Source:MGI Symbol;Acc:MGI:1925117]	Multiple_Complex
TC0700000004.mm.1	4.43	4.27	1.11	0.1111	0.5076	D7Ertd143e; Mir291a; Mir292; Mir293; Mir294; Mir295; Mir291b	DNA segment, Chr 7, ERATO Doi 143, expressed; microRNA 291a; microRNA 292; microRNA 293; microRNA 294; microRNA 295; microRNA 291b; DNA segment, Chr 7, ERATO Doi 143, expressed (D7Ertd143e), non-coding RNA.	Multiple_Complex
TC0700004441.mm.1	5.12	4.92	1.15	0.0338	0.3871	D7Ertd443e	DNA segment, Chr 7, ERATO Doi 443, expressed	Multiple_Complex
TC1200001919.mm.1	4.16	4.04	1.09	0.427	0.7627	D830013O20Rik	RIKEN cDNA D830013O20 gene	Multiple_Complex
TC0500003711.mm.1	4.67	4.61	1.05	0.4174	0.7575	D830014E11Rik; Lrrc8d	RIKEN cDNA D830014E11 gene; leucine rich repeat containing 8D	Multiple_Complex
TC0800000322.mm.1	4.85	4.82	1.03	0.6668	0.8843	D830025C05Rik	RIKEN cDNA D830025C05 gene [Source:MGI Symbol;Acc:MGI:3698180]	Multiple_Complex
TC1400000004.mm.1	7.41	7.2	1.16	0.0296	0.3778	D830030K20Rik	RIKEN cDNA D830030K20 gene (D830030K20Rik), mRNA.; RIKEN cDNA D830030K20 gene	Multiple_Complex
TC1400000014.mm.1	6.84	6.65	1.14	0.0533	0.4204	D830030K20Rik; Gm3033	RIKEN cDNA D830030K20 gene; predicted gene 3033	Coding
TC0400003483.mm.1	12.38	12.48	-1.07	0.2084	0.6056	D830031N03Rik; Macf1	RIKEN cDNA D830031N03 gene; microtubule-actin crosslinking factor 1; RIKEN cDNA D830031N03 gene (D830031N03Rik), mRNA.	Multiple_Complex
TC1000002245.mm.1	4.49	4.44	1.04	0.669	0.8855	D830039M14Rik	RIKEN cDNA D830039M14 gene [Source:MGI Symbol;Acc:MGI:2445111]	Multiple_Complex
TC0600001285.mm.1	4.91	4.81	1.07	0.507	0.8082	D830050J10Rik	RIKEN cDNA D830050J10 gene	Coding
TC0800002578.mm.1	10.19	9.95	1.18	0.2124	0.6091	D8Ertd738e	DNA segment, Chr 8, ERATO Doi 738, expressed	Coding
TC0800000441.mm.1	8.7	9.26	-1.47	0.1046	0.4999	D8Ertd82e	DNA segment, Chr 8, ERATO Doi 82, expressed	Multiple_Complex
TC1300001761.mm.1	4.46	4.51	-1.04	0.6195	0.8645	D930007J09Rik	RIKEN cDNA D930007J09 gene [Source:MGI Symbol;Acc:MGI:3686989]	Multiple_Complex
TC0300002237.mm.1	6.76	6.58	1.13	0.1036	0.4992	D930015E06Rik	RIKEN cDNA D930015E06 gene	Multiple_Complex
TC1000001497.mm.1	4.24	4.68	-1.35	0.0021	0.2215	D930020B18Rik	RIKEN cDNA D930020B18 gene	Coding
TC0700000406.mm.1	3.81	3.82	-1	0.9419	0.9832	D930028M14Rik	RIKEN cDNA D930028M14 gene	Multiple_Complex
TC1100000574.mm.1	5.24	5.29	-1.03	0.3886	0.7392	D930048N14Rik	RIKEN cDNA D930048N14 gene	Multiple_Complex
TC1200000820.mm.1	6.25	6.32	-1.05	0.4133	0.7549	D030025P21Rik	RIKEN cDNA D030025P21 gene	Multiple_Complex
TC0700000972.mm.1	4.61	4.6	1.01	0.9051	0.9715	E030018B13Rik	RIKEN cDNA E030018B13 gene	Coding
TC1900001206.mm.1	15.33	15	1.26	0.3686	0.7266	E030024N20Rik	RIKEN cDNA E030024N20 gene [Source:MGI Symbol;Acc:MGI:2442009]	Multiple_Complex
TC1100003983.mm.1	4	3.88	1.09	0.2564	0.6474	E030025P04Rik	RIKEN cDNA E030025P04 gene	Multiple_Complex
TC1000001851.mm.1	4.82	4.73	1.06	0.4148	0.7558	E030030I06Rik	RIKEN cDNA E030030I06 gene	Multiple_Complex
TC0800000556.mm.1	4.12	4.04	1.05	0.461	0.782	E030037K01Rik	RIKEN cDNA E030037K01 gene [Source:MGI Symbol;Acc:MGI:3704310]	Coding
TC1100003648.mm.1	4.41	4.31	1.07	0.3767	0.7313	E130012A19Rik	RIKEN cDNA E130012A19 gene	Coding
TC0600003535.mm.1	5.84	5.75	1.07	0.1151	0.5111	E130112N10Rik; Vamp1	RIKEN cDNA E130112N10 gene; vesicle-associated membrane protein 1; RIKEN cDNA E130112N10 gene (E130112N10Rik), non-coding RNA.	Multiple_Complex
TC0400003106.mm.1	5.56	5.44	1.08	0.2357	0.6298	E130114P18Rik	RIKEN cDNA E130114P18 gene	Multiple_Complex
TC0500002101.mm.1	6.18	6.22	-1.03	0.6707	0.8862	E130116L18Rik	RIKEN cDNA E130116L18 gene [Source:MGI Symbol;Acc:MGI:1925120]	Coding
TC0700001729.mm.1	7.62	7.2	1.34	0.0561	0.4283	E130201H02Rik	Y box protein 1 pseudogene; RIKEN cDNA E130201H02 gene	Multiple_Complex
TC0700000560.mm.1	3.91	4.14	-1.17	0.416	0.7564	E130208F15Rik	RIKEN cDNA E130208F15 gene [Source:MGI Symbol;Acc:MGI:3767226]	Coding
TC0700000666.mm.1	4.13	4.01	1.08	0.0869	0.4754	E130304I02Rik	RIKEN cDNA E130304I02 gene	Multiple_Complex
TC0400000660.mm.1	6.33	6.4	-1.05	0.5332	0.8225	E130308A19Rik	RIKEN cDNA E130308A19 gene	Multiple_Complex
TC0500003554.mm.1	6.42	6.42	-1	0.7739	0.9267	E130309D02Rik	RIKEN cDNA E130309D02 gene	Multiple_Complex
TC1100001046.mm.1	5.95	5.85	1.07	0.8876	0.9658	E130309D14Rik	RIKEN cDNA E130309D14 gene	Coding
TC1600001540.mm.1	3.65	3.69	-1.03	0.649	0.878	E130310I04Rik	RIKEN cDNA E130310I04 gene; RIKEN cDNA E130310I04 gene (E130310I04Rik), transcript variant 1, non-coding RNA.; RIKEN cDNA E130310I04 gene (E130310I04Rik), transcript variant 2, non-coding RNA.	Multiple_Complex
TC0300002073.mm.1	5.05	5.03	1.02	0.7269	0.9083	E130311K13Rik	RIKEN cDNA E130311K13 gene	Multiple_Complex
TC1800001196.mm.1	4.34	4.29	1.04	0.4764	0.791	E230025N22Rik	Riken cDNA E230025N22 gene	Multiple_Complex
TC0700001273.mm.1	5.32	5.18	1.11	0.266	0.6554	E230029C05Rik	RIKEN cDNA E230029C05 gene (E230029C05Rik), long non-coding RNA.; RIKEN cDNA E230029C05 gene; RIKEN cDNA E230029C05 gene (E230029C05Rik), non-coding RNA.	Multiple_Complex
TC0600002137.mm.1	10.75	10.82	-1.05	0.3335	0.703	E330009J07Rik	RIKEN cDNA E330009J07 gene	Coding
TC1900000859.mm.1	3.65	3.53	1.08	0.1557	0.5559	E330013P04Rik	RIKEN cDNA E330013P04 gene	Multiple_Complex
TC0500000919.mm.1	4.36	4.29	1.05	0.3536	0.7161	E330014E10Rik; Gm3286	RIKEN cDNA E330014E10 gene; predicted gene 3286; predicted gene 3286 (Gm3286), transcript variant 1, mRNA.	Coding
TC5_GL456354_random00000004.mm.1	3.85	3.73	1.08	0.1244	0.5229	E330014E10Rik; Gm3286	RIKEN cDNA E330014E10 gene (E330014E10Rik), mRNA.; predicted gene 3286 (Gm3286), transcript variant 2, mRNA.; predicted gene 3286 (Gm3286), transcript variant 1, mRNA.; RIKEN cDNA E330014E10 gene; predicted gene 3286	Coding
TC1600001773.mm.1	3.3	3.17	1.1	0.1196	0.5159	E330017A01Rik	RIKEN cDNA E330017A01 gene	Coding
TC0100003276.mm.1	5.35	5.12	1.17	0.0107	0.3087	E330020D12Rik	Riken cDNA E330020D12 gene	Multiple_Complex
TC0600003324.mm.1	3.8	3.76	1.02	0.9717	0.992	E330021D16Rik	RIKEN cDNA E330021D16 gene	Coding
TC1400000226.mm.1	4.55	4.52	1.02	0.4312	0.7652	E330034G19Rik	RIKEN cDNA E330034G19 gene	Multiple_Complex
TC0700004663.mm.1	6	5.98	1.01	0.8823	0.964	E430018J23Rik	RIKEN cDNA E430018J23 gene	Coding
TC1500001596.mm.1	8.9	8.93	-1.02	0.8727	0.9615	E430025E21Rik	RIKEN cDNA E430025E21 gene	Coding
TC0X00002809.mm.1	6	5.85	1.11	0.3111	0.689	E530001F21Rik	RIKEN cDNA E530001F21 gene	Multiple_Complex
TC1900001440.mm.1	4.21	3.61	1.51	0.1067	0.5031	F530104D19Rik	PREDICTED: RIKEN cDNA F530104D19 gene (F530104D19Rik), mRNA.	Multiple_Complex
TSUnmapped00000050.mm.1	3.81	4.07	-1.19	0.2163	0.6118	F630003A18Rik	RIKEN cDNA F630003A18 gene	Coding
TC0700003805.mm.1	5.37	4.97	1.33	0.1242	0.5228	F730035P03Rik	RIKEN cDNA F730035P03 gene	Coding
TC0900000898.mm.1	9.18	9.89	-1.64	0.1733	0.573	F830001A07Rik	RIKEN cDNA F830001A07 gene	Multiple_Complex
TC1000000404.mm.1	3.45	3.4	1.04	0.2792	0.666	F830002L21Rik	RIKEN cDNA F830002L21 gene	Multiple_Complex
TC1800000609.mm.1	4.38	4.31	1.05	0.5152	0.8129	F830016B08Rik	RIKEN cDNA F830016B08 gene	Coding
TC0200004604.mm.1	4.23	4.12	1.08	0.2195	0.6142	F830045P16Rik	RIKEN cDNA F830045P16 gene	Coding
TC0300002020.mm.1	3.67	3.5	1.13	0.1074	0.5037	F830104G03Rik	RIKEN cDNA F830104G03 gene	Coding
TC1100002969.mm.1	4.45	4.3	1.11	0.2094	0.6067	F930015N05Rik	RIKEN cDNA F930015N05 gene	Multiple_Complex
TC1800000007.mm.1	4.65	4.58	1.05	0.4969	0.8027	G430049J08Rik	RIKEN cDNA G430049J08 gene [Source:MGI Symbol;Acc:MGI:3645649]	Multiple_Complex
TC0800000960.mm.1	6.03	6.16	-1.09	0.8422	0.9507	G430095P16Rik	RIKEN cDNA G430095P16 gene	Coding
TC0100000761.mm.1	4.14	3.99	1.11	0.5946	0.8532	G530012D18Rik	RIKEN cDNA G530012D1 gene [Source:MGI Symbol;Acc:MGI:3642025]	Coding
TC1100000924.mm.1	4.3	4.23	1.05	0.8547	0.9553	G630025P09Rik	RIKEN cDNA G630025P09 gene; RIKEN cDNA G630025P09 gene (G630025P09Rik), non-coding RNA.	Multiple_Complex
TC1300000547.mm.1	5.85	5.62	1.17	0.3426	0.7087	G630093K05Rik	RIKEN cDNA G630093K05 gene; RIKEN cDNA G630093K05 gene (G630093K05Rik), non-coding RNA.	Multiple_Complex
TC0100000444.mm.1	4.71	4.7	1	0.4967	0.8027	G730003C15Rik	RIKEN cDNA G730003C15 gene [Source:MGI Symbol;Acc:MGI:3641700]	Coding
TC0700001807.mm.1	4.88	4.98	-1.08	0.5793	0.8453	G730046D07Rik	RIKEN cDNA G730046D07 gene [Source:MGI Symbol;Acc:MGI:3642131]	Coding
TC0600002258.mm.1	3.86	4.04	-1.13	0.8569	0.9563	G930045G22Rik; RP23-210L10.1	RIKEN cDNA G930045G22 gene [Source:MGI Symbol;Acc:MGI:3588242]; Novel protein (G930045G22Rik)	Multiple_Complex
TC1200001048.mm.1	4.14	3.94	1.15	0.3447	0.7099	Gm10000	predicted gene 10000	Coding
TC1200000776.mm.1	3.99	3.86	1.1	0.2882	0.6722	Gm10006	predicted gene 10006	Coding
TC0600003194.mm.1	6.75	6.72	1.02	0.2147	0.6106	Gm10010	predicted gene 10010 [Source:MGI Symbol;Acc:MGI:3641978]	Coding
TC0600003480.mm.1	6.58	6.35	1.17	0.3162	0.6927	Gm10011	predicted gene 10011	Multiple_Complex
TC1700000395.mm.1	16.31	16.19	1.09	0.1468	0.5465	Gm10012	predicted pseudogene 10012 [Source:MGI Symbol;Acc:MGI:3642454]	Multiple_Complex
TC0700004562.mm.1	7.44	7.53	-1.06	0.8401	0.9497	Gm10013	predicted gene 10013 [Source:MGI Symbol;Acc:MGI:3704303]	Coding
TC1500001509.mm.1	13.49	13.22	1.2	0.5253	0.8189	Gm10020	predicted pseudogene 10020	Multiple_Complex
TC1400002857.mm.1	8.01	7.86	1.11	0.2212	0.6155	Gm10021	predicted gene 10021	Coding
TC1000000764.mm.1	4.1	4	1.08	0.0894	0.4789	Gm10024	predicted gene 10024	Coding
TC0500000509.mm.1	18.08	18.03	1.03	0.375	0.7302	Gm10025	predicted gene 10025 [Source:MGI Symbol;Acc:MGI:3708717]	Multiple_Complex
TC0900001479.mm.1	4.3	4.24	1.04	0.2043	0.6027	Gm10030	predicted gene 10030 [Source:MGI Symbol;Acc:MGI:3641798]	Coding
TC0100001418.mm.1	12.91	13.15	-1.18	0.0981	0.4916	Gm10031	predicted pseudogene 10031	Multiple_Complex
TC1400000949.mm.1	3.34	3.72	-1.3	0.2574	0.6484	Gm10032	predicted gene 10032	Coding
TC0800002361.mm.1	8.41	8.3	1.08	0.1463	0.5458	Gm10033	predicted gene 10033	Multiple_Complex
TC1800000134.mm.1	14.33	14.1	1.17	0.0194	0.3491	Gm10036	predicted gene 10036 [Source:MGI Symbol;Acc:MGI:3642334]	Coding
TC1300000832.mm.1	6.19	6.09	1.07	0.2426	0.6355	Gm10037	predicted gene 10037 [Source:MGI Symbol;Acc:MGI:3645096]	Coding
TC0200001529.mm.1	7.97	8.01	-1.02	0.6811	0.8907	Gm10038	predicted gene 10038 [Source:MGI Symbol;Acc:MGI:3708662]	Multiple_Complex
TC1400001431.mm.1	4.51	4.48	1.02	0.6597	0.8817	Gm10044	predicted gene 10044	Multiple_Complex
TC0500002889.mm.1	6.66	6.79	-1.09	0.1168	0.5129	Gm10047	predicted gene 10047	Coding
TC0500002365.mm.1	10.78	10.91	-1.09	0.3777	0.7319	Gm10048	predicted gene 10048	Multiple_Complex
TC1900000398.mm.1	15.21	15.1	1.07	0.3516	0.7147	Gm10053	predicted gene 10053 [Source:MGI Symbol;Acc:MGI:3704493]	Coding
TC1600000972.mm.1	7.63	7.48	1.11	0.2509	0.643	Gm10061	predicted gene 10061 [Source:MGI Symbol;Acc:MGI:3642175]	Coding
TC0500003218.mm.1	8.25	8.15	1.07	0.1375	0.536	Gm10064	predicted gene 10064 [Source:MGI Symbol;Acc:MGI:3645905]	Coding
TC1300001542.mm.1	4.55	4.61	-1.04	0.8374	0.9486	Gm10065	predicted gene 10065 [Source:MGI Symbol;Acc:MGI:3642433]	Coding
TC0800001681.mm.1	3.77	3.65	1.09	0.5911	0.8514	Gm10067	predicted gene 10067 [Source:MGI Symbol;Acc:MGI:3708768]	Multiple_Complex
TC1700000726.mm.1	8.91	9	-1.06	0.4134	0.7549	Gm10074	predicted gene 10074	Multiple_Complex
TC1400001207.mm.1	17.31	16.96	1.27	0.024	0.3641	Gm10076	predicted gene 10076 [Source:MGI Symbol;Acc:MGI:3704451]	Multiple_Complex
TC0700004030.mm.1	3.42	3.36	1.04	0.7427	0.9142	Gm10081	predicted gene 10081	Coding
TC0800000548.mm.1	4.5	4.24	1.2	0.0698	0.4515	Gm10083	predicted gene 10083 [Source:MGI Symbol;Acc:MGI:3642418]	Coding
TC0500001107.mm.1	14.06	13.77	1.23	0.0066	0.2821	Gm10086	predicted pseudogene 10086 [Source:MGI Symbol;Acc:MGI:3642342]	Multiple_Complex
TC0700001629.mm.1	5.54	5.63	-1.06	0.436	0.7682	Gm10087	predicted gene 10087	Multiple_Complex
TC1600000255.mm.1	9.81	9.88	-1.05	0.0768	0.4619	Gm10088	predicted gene 10088	Coding
TC1600000506.mm.1	3.34	3.52	-1.13	0.8761	0.9623	Gm10092	predicted gene 10092 [Source:MGI Symbol;Acc:MGI:3642362]	Coding
TC0800001147.mm.1	10.83	10.89	-1.04	0.6462	0.8768	Gm10094	predicted gene 10094	Coding
TC1400000825.mm.1	8.21	8.43	-1.17	0.334	0.7032	Gm10094; Sap18; Mir3077	predicted gene 10094; Sin3-associated polypeptide 18; microRNA 3077	Multiple_Complex
TC1000000031.mm.1	4.91	4.86	1.03	0.1593	0.5599	Gm10097	predicted gene 10097 [Source:MGI Symbol;Acc:MGI:3642295]	Coding
TC1000000767.mm.1	4.99	4.94	1.04	0.3901	0.7403	Gm10100	predicted gene 10100	Coding
TC0800000213.mm.1	4.84	4.81	1.02	0.5898	0.8506	Gm10104; Defa4	predicted gene 10104; defensin, alpha, 4	Coding
TC0900002020.mm.1	8.18	7.86	1.25	0.0145	0.3299	Gm10105	predicted pseudogene 10105	Multiple_Complex
TC0700002954.mm.1	5.05	4.86	1.14	0.2983	0.6796	Gm10109	predicted gene 10109 [Source:MGI Symbol;Acc:MGI:3647742]	Coding
TC1400002524.mm.1	7.66	7.51	1.11	0.478	0.7921	Gm10110	predicted gene 10110 [Source:MGI Symbol;Acc:MGI:3641718]	Coding
TC1300001918.mm.1	3.93	3.68	1.19	0.0648	0.4437	Gm10113	predicted gene 10113	Coding
TC0200002912.mm.1	4.98	4.54	1.35	0.1512	0.5508	Gm10115	predicted gene 10115	Coding
TC1000002287.mm.1	10.08	10.06	1.02	0.7343	0.9111	Gm10118	predicted gene 10118	Coding
TC1300002308.mm.1	15.33	15.16	1.13	0.104	0.4995	Gm10126	predicted gene 10126 [Source:MGI Symbol;Acc:MGI:3809072]	Coding
TC1400001429.mm.1	9.04	8.73	1.24	0.0134	0.3248	Gm10128	predicted gene 10128 [Source:MGI Symbol;Acc:MGI:3704427]	Coding
TC1300001831.mm.1	5.02	4.95	1.05	0.6706	0.8862	Gm10129	predicted gene 10129	Coding
TC0200002219.mm.1	7.77	7.65	1.09	0.2742	0.6616	Gm10130	predicted gene 10130 [Source:MGI Symbol;Acc:MGI:3642547]	Coding
TC1400002455.mm.1	14.49	14.18	1.23	0.0146	0.3303	Gm10132	predicted gene 10132	Coding
TC0200000485.mm.1	5.22	5.18	1.03	0.6194	0.8645	Gm10134	predicted gene 10134 [Source:MGI Symbol;Acc:MGI:3642322]	Coding
TC0500002583.mm.1	7.64	7.29	1.27	0.0577	0.4311	Gm10135	predicted gene 10135 [Source:MGI Symbol;Acc:MGI:3710643]	Coding
TC0100003252.mm.1	5.6	5.65	-1.04	0.6577	0.8809	Gm10138	predicted gene 10138	Multiple_Complex
TC1300000795.mm.1	9.79	9.79	-1	0.9053	0.9716	Gm10139	predicted gene 10139 [Source:MGI Symbol;Acc:MGI:3642815]	Coding
TC1000000765.mm.1	6.06	6.18	-1.08	0.1577	0.5584	Gm10142	predicted gene 10142	Coding
TC0900002515.mm.1	5.74	5.41	1.26	0.0381	0.3948	Gm10144	PREDICTED: predicted pseudogene 10144 (Gm10144), mRNA.	Coding
TC1000000783.mm.1	10.33	10.22	1.08	0.2638	0.6532	Gm10146	predicted gene 10146 [Source:MGI Symbol;Acc:MGI:3704367]	Coding
TC0700002109.mm.1	4.56	4.32	1.17	0.0536	0.4213	Gm10152	predicted gene 10152	Coding
TC0700004558.mm.1	8	7.78	1.17	0.1246	0.5229	Gm10153	predicted gene 10153	Coding
TC0400002952.mm.1	15.11	14.85	1.19	0.0138	0.3274	Gm10154	predicted gene 10154 [Source:MGI Symbol;Acc:MGI:3642271]	Multiple_Complex
TC0700003620.mm.1	17.55	17.5	1.04	0.5442	0.828	Gm10160	predicted gene 10160 [Source:MGI Symbol;Acc:MGI:3642884]	Coding
TC0700001085.mm.1	7.23	6.81	1.34	0.0052	0.2625	Gm10161	predicted pseudogene 10161 [Source:MGI Symbol;Acc:MGI:3642846]	Multiple_Complex
TC0700003481.mm.1	4.02	3.91	1.08	0.6327	0.8712	Gm10172	predicted gene 10172 [Source:MGI Symbol;Acc:MGI:3708755]	Multiple_Complex
TC0700002588.mm.1	13.86	13.69	1.12	0.167	0.5666	Gm10175	predicted gene 10175 [Source:MGI Symbol;Acc:MGI:3704287]	Coding
TC0100001477.mm.1	3.67	3.63	1.03	0.174	0.5736	Gm10176	predicted gene 10176	Coding
TC0900000360.mm.1	13.23	13.01	1.16	0.1144	0.5103	Gm10177	predicted gene 10177	Multiple_Complex
TC0900000240.mm.1	9.23	8.43	1.74	0.0009	0.1787	Gm10181	predicted gene 10181 [Source:MGI Symbol;Acc:MGI:3642432]	Coding
TC0900001906.mm.1	12.27	12.18	1.06	0.0677	0.4488	Gm10182	predicted pseudogene 10182 [Source:MGI Symbol;Acc:MGI:3704327]	Multiple_Complex
TC0100003071.mm.1	4.01	3.97	1.03	0.9028	0.9706	Gm10188	predicted gene 10188 [Source:MGI Symbol;Acc:MGI:3704196]	Coding
TC1700002585.mm.1	3.68	3.75	-1.05	0.6791	0.8897	Gm10190	predicted gene 10190	Multiple_Complex
TC0400003103.mm.1	4.91	4.85	1.04	0.5273	0.8198	Gm10192	predicted gene 10192 [Source:MGI Symbol;Acc:MGI:3642867]	Multiple_Complex
TC0100001010.mm.1	14.43	14.57	-1.1	0.938	0.9823	Gm10193	PREDICTED: predicted gene 10193 (Gm10193), mRNA.	Coding
TC1900001670.mm.1	6.23	6.32	-1.07	0.9944	0.9984	Gm10197	predicted gene 10197 [Source:MGI Symbol;Acc:MGI:3704501]	Coding
TC1300001251.mm.1	7.82	7.67	1.11	0.1403	0.5391	Gm10198	predicted gene 10198 [Source:MGI Symbol;Acc:MGI:3642607]	Coding
TC0600001767.mm.1	9.39	9.06	1.26	0.0102	0.307	Gm10203	predicted gene 10203 [Source:MGI Symbol;Acc:MGI:3642365]	Coding
TC0500002339.mm.1	4.66	4.53	1.09	0.733	0.9105	Gm10205	predicted gene 10205 [Source:MGI Symbol;Acc:MGI:3708715]	Multiple_Complex
TC0800000072.mm.1	17.2	17.03	1.12	0.0549	0.4255	Gm10217	predicted gene 10217 [Source:MGI Symbol;Acc:MGI:3642099]	Coding
TC0500002124.mm.1	5.82	5.74	1.06	0.4133	0.7549	Gm10220	predicted gene 10220	Coding
TC0500002086.mm.1	14.93	14.61	1.25	0.0031	0.2408	Gm10221	predicted gene 10221 [Source:MGI Symbol;Acc:MGI:3708709]	Coding
TC0100002075.mm.1	19.68	19.66	1.02	0.6438	0.8764	Gm10222	predicted gene 10222 [Source:MGI Symbol;Acc:MGI:3642643]	Coding
TC1600002025.mm.1	4.47	4.39	1.06	0.1544	0.5542	Gm10228	predicted gene 10228	Coding
TC1600000967.mm.1	3.67	3.49	1.14	0.8117	0.9406	Gm10229	predicted gene 10229	Coding
TC0X00001996.mm.1	4.66	4.38	1.21	0.0249	0.3664	Gm10230; Gm10147; Gm10487; Gm14632; Gm10096; Gm10058; Gm10486; Gm14819; Gm4836	predicted gene 10230 (Gm10230), mRNA.; predicted gene 10147 (Gm10147), mRNA.; predicted gene 10487 (Gm10487), mRNA.; predicted gene 14632 (Gm14632), mRNA.; predicted gene 10096 (Gm10096), mRNA.; predicted gene 10058 (Gm10058), mRNA.; predicted gene 10486 (Gm10486), mRNA.; predicted gene 14819 (Gm14819), mRNA.; predicted gene 4836 (Gm4836), mRNA.; predicted gene 4836; predicted gene 10486	Coding
TC0X00002013.mm.1	4.92	4.64	1.22	0.0519	0.4181	Gm10230; Gm10147; Gm10487; Gm14632; Gm10096; Gm10058; Gm10486; Gm14819; Gm4836	predicted gene 10230 (Gm10230), mRNA.; predicted gene 10147 (Gm10147), mRNA.; predicted gene 10487 (Gm10487), mRNA.; predicted gene 14632 (Gm14632), mRNA.; predicted gene 10096 (Gm10096), mRNA.; predicted gene 10058 (Gm10058), mRNA.; predicted gene 10486 (Gm10486), mRNA.; predicted gene 14819 (Gm14819), mRNA.; predicted gene 4836 (Gm4836), mRNA.; predicted gene 10487; predicted gene 10486	Coding
TC0X00001991.mm.1	4.63	4.41	1.16	0.0407	0.4	Gm10230; Gm10147; Gm14632; Gm10096; Gm10058; Gm10486; Gm14819	predicted gene 10230 (Gm10230), mRNA.; predicted gene 10147 (Gm10147), mRNA.; predicted gene 14632 (Gm14632), mRNA.; predicted gene 10096 (Gm10096), mRNA.; predicted gene 10058 (Gm10058), mRNA.; predicted gene 10486 (Gm10486), mRNA.; predicted gene 14819 (Gm14819), mRNA.	Multiple_Complex
TC0X00001969.mm.1	4.63	4.41	1.16	0.0407	0.4	Gm10230; Gm10147; Gm14632; Gm10096; Gm10058; Gm10486; Gm14819; Gm10488	predicted gene 10230 (Gm10230), mRNA.; predicted gene 10147; predicted gene 14632 (Gm14632), mRNA.; predicted gene 10096; predicted gene 10058 (Gm10058), mRNA.; predicted gene 10486 (Gm10486), mRNA.; predicted gene 14819 (Gm14819), mRNA.; predicted gene 10486; predicted gene 10488	Multiple_Complex
TC0600001124.mm.1	3.36	3.01	1.28	0.4445	0.7723	Gm10234	predicted gene 10234 [Source:MGI Symbol;Acc:MGI:3642207]	Coding
TC1600000499.mm.1	4.32	4.25	1.05	0.7756	0.9273	Gm10237	predicted gene 10237	Multiple_Complex
TC0600002235.mm.1	4.5	4.32	1.14	0.2756	0.6629	Gm10242	predicted gene 10242 [Source:MGI Symbol;Acc:MGI:3642310]	Coding
TC1400001414.mm.1	5.06	4.86	1.15	0.0794	0.4658	Gm10251	predicted gene 10251 [Source:MGI Symbol;Acc:MGI:3704424]	Coding
TC0300002323.mm.1	5.46	5.56	-1.07	0.9766	0.9936	Gm10253	predicted gene 10253	Coding
TC0Y00000554.mm.1	4.23	4	1.17	0.0183	0.3464	Gm10256; Gm10352	predicted gene 10256; predicted gene 10352	Coding
TC0300001778.mm.1	3.89	3.33	1.47	0.0593	0.4341	Gm10258	predicted gene 10258	Coding
TC1300002491.mm.1	13.95	13.61	1.26	0.0153	0.3329	Gm10260	predicted gene 10260 [Source:MGI Symbol;Acc:MGI:3642298]	Coding
TC1300000880.mm.1	13.3	12.83	1.39	0.0279	0.3747	Gm10263	predicted gene 10263 [Source:MGI Symbol;Acc:MGI:3642825]	Coding
TC1200000894.mm.1	7.57	7.65	-1.06	0.614	0.8623	Gm10264	predicted gene 10264	Coding
TC1800001277.mm.1	3.93	3.57	1.28	0.1195	0.5159	Gm10267	predicted gene 10267	Coding
TC1800001047.mm.1	13.5	13.16	1.27	0.0856	0.4734	Gm10269	predicted gene 10269 [Source:MGI Symbol;Acc:MGI:3642381]	Coding
TC1000002917.mm.1	4.39	4.26	1.09	0.1042	0.4995	Gm10271	predicted gene 10271 [Source:MGI Symbol;Acc:MGI:3642827]	Multiple_Complex
TC1000000763.mm.1	5.01	4.93	1.06	0.4287	0.7636	Gm10272	keratin associated protein 12-4	Multiple_Complex
TC1100003274.mm.1	4.02	4.06	-1.02	0.9707	0.9919	Gm10277	predicted gene 10277	Coding
TC0800002285.mm.1	4.65	4.43	1.16	0.0797	0.466	Gm10283	predicted gene 10283	Coding
TC0800002737.mm.1	3.31	3.29	1.01	0.3463	0.7107	Gm10286	predicted gene 10286 [Source:MGI Symbol;Acc:MGI:3642117]	Multiple_Complex
TC0300003108.mm.1	15.42	15.04	1.3	0.0146	0.3303	Gm10288	predicted gene 10288 [Source:MGI Symbol;Acc:MGI:3704227]	Coding
TC0700003482.mm.1	2.83	3	-1.12	0.1568	0.5576	Gm10295	predicted gene 10295	Coding
TC0700002945.mm.1	5.74	5.43	1.24	0.2149	0.6106	Gm10298	predicted gene 10298 [Source:MGI Symbol;Acc:MGI:3642777]	Multiple_Complex
TC0400001576.mm.1	4.09	3.85	1.18	0.2508	0.643	Gm10300	predicted gene 10300 [Source:MGI Symbol;Acc:MGI:3641670]	Coding
TC0400001082.mm.1	4.57	4.77	-1.15	0.2899	0.6735	Gm10304	predicted gene 10304	Coding
TC0400000998.mm.1	5.83	5.62	1.15	0.0427	0.4043	Gm10305	predicted gene 10305	Coding
TC0400000946.mm.1	3.96	3.99	-1.02	0.8855	0.9651	Gm10306	predicted gene 10306 [Source:MGI Symbol;Acc:MGI:3704234]	Coding
TC1700001333.mm.1	7.87	7.83	1.03	0.6551	0.8806	Gm10308	predicted gene 10308 [Source:MGI Symbol;Acc:MGI:3641943]	Coding
TC1700002673.mm.1	4.17	3.77	1.33	0.3533	0.7158	Gm10309	predicted gene 10309	Coding
TC1300000739.mm.1	6.42	5.95	1.39	0.0119	0.3153	Gm10312	predicted gene 10312 [Source:MGI Symbol;Acc:MGI:3642243]	Multiple_Complex
TC1000000769.mm.1	5.67	5.72	-1.04	0.5664	0.839	Gm10318	predicted gene 10318	Coding
TC0600001375.mm.1	3.85	3.92	-1.05	0.9434	0.9836	Gm10319	murinoglobulin pseudogene	Multiple_Complex
TC1300002503.mm.1	4.97	4.84	1.09	0.5208	0.8164	Gm10320	predicted pseudogene 10320 [Source:MGI Symbol;Acc:MGI:3642323]	Multiple_Complex
TC1000000536.mm.1	5.22	4.93	1.22	0.0263	0.3718	Gm10322	predicted gene 10322 [Source:MGI Symbol;Acc:MGI:3704363]	Coding
TC1300002235.mm.1	4.55	4.52	1.02	0.8725	0.9615	Gm10323	predicted gene 10323 [Source:MGI Symbol;Acc:MGI:3809062]	Coding
TC1300000803.mm.1	5.45	5.47	-1.01	0.7764	0.9275	Gm10324	predicted gene 10324	Coding
TC1200001523.mm.1	6.02	5.93	1.06	0.2681	0.6566	Gm10330; LOC100861601	predicted gene 10330 [Source:MGI Symbol;Acc:MGI:3642221]; PREDICTED: zinc finger protein 120-like (LOC100861601), mRNA.	Coding
TC0600002156.mm.1	4.68	4.76	-1.06	0.6829	0.8913	Gm10334; Prss3	predicted gene 10334; protease, serine, 3, mRNA (cDNA clone MGC:176265 IMAGE:9055916), complete cds.	Coding
TC1000000109.mm.1	14.56	14.29	1.21	0.0236	0.363	Gm10335	predicted gene 10335	Coding
TC1500001103.mm.1	8.87	9.15	-1.21	0.0574	0.4307	Gm10337	predicted gene 10337 [Source:MGI Symbol;Acc:MGI:3704459]	Coding
TC1400002855.mm.1	6.6	6.43	1.12	0.0334	0.387	Gm10338	predicted gene 10338	Coding
TC1400001426.mm.1	5.45	5.31	1.11	0.1078	0.5037	Gm10339	predicted gene 10339 [Source:MGI Symbol;Acc:MGI:3704428]	Coding
TC1400002781.mm.1	9.01	8.74	1.2	0.009	0.2998	Gm10340	predicted gene 10340 [Source:MGI Symbol;Acc:MGI:3641969]	Multiple_Complex
TC0X00002998.mm.1	4.83	4.99	-1.12	0.4289	0.7637	Gm10344	predicted gene 10344	Coding
TC0700000752.mm.1	5.48	5.36	1.09	0.1229	0.5205	Gm10351	predicted gene 10351 [Source:MGI Symbol;Acc:MGI:3642306]	Multiple_Complex
TC0500001974.mm.1	4.91	4.77	1.11	0.35	0.7136	Gm10354	predicted gene 10354	Coding
TC0300002599.mm.1	7.88	8.01	-1.1	0.2231	0.6174	Gm10355	predicted gene 10355 [Source:MGI Symbol;Acc:MGI:3641762]	Coding
TC1500001697.mm.1	5.92	6.04	-1.08	0.7106	0.9019	Gm10362	PREDICTED: predicted gene 10362 (Gm10362), mRNA.	Coding
TC1400000771.mm.1	6.45	6.41	1.02	0.6208	0.865	Gm10364	glyceraldehyde-3-phosphate dehydrogenase pseudogene	Multiple_Complex
TC0500001566.mm.1	4.44	4.11	1.26	0.0694	0.4512	Gm10369	predicted gene 10369	Coding
TC1500001461.mm.1	4.78	4.68	1.07	0.6409	0.8754	Gm10373	predicted gene 10373	Multiple_Complex
TC1400001862.mm.1	4.62	4.28	1.26	0.0128	0.3205	Gm10375	predicted gene 10375	Coding
TC1400002860.mm.1	4.39	4.38	1	0.2478	0.6402	Gm10377	predicted gene 10377 (Gm10377), mRNA.	Coding
TC1400002861.mm.1	4.41	4.14	1.2	0.0225	0.3603	Gm10377; Gm10375	predicted gene 10377 (Gm10377), mRNA.; predicted gene 10377; predicted gene 10375	Coding
TC1400002862.mm.1	4.46	4.28	1.14	0.0697	0.4515	Gm10377; Gm10376	predicted gene 10377; predicted gene 10376	Coding
TC1400000430.mm.1	5.39	4.82	1.48	0.0015	0.2003	Gm10378	predicted gene 10378 [Source:MGI Symbol;Acc:MGI:3704430]	Coding
TC1500001387.mm.1	3.15	3.07	1.06	0.9256	0.9781	Gm10384	predicted gene 10384	Coding
TC1100003268.mm.1	3.97	3.88	1.06	0.3869	0.7383	Gm10392	predicted gene 10392 [Source:MGI Symbol;Acc:MGI:3704377]	Coding
TC0500003128.mm.1	4.33	4.29	1.03	0.6433	0.8764	Gm10399	predicted gene 10399 [Source:MGI Symbol;Acc:MGI:3704255]	Coding
TC0500003086.mm.1	6.81	6.94	-1.09	0.764	0.9226	Gm10401	predicted gene 10401 [Source:MGI Symbol;Acc:MGI:3704254]	Coding
TC1400002848.mm.1	8.17	7.94	1.17	0.0588	0.4332	Gm10406	predicted gene 10406	Coding
TC1400000007.mm.1	6.72	6.48	1.18	0.0197	0.3501	Gm10408	predicted gene 10408	Coding
TC1400000011.mm.1	7.08	6.8	1.21	0.0215	0.3571	Gm10408; Gm3043	predicted gene 10408 (Gm10408), mRNA.; predicted gene 3043; predicted gene 10408	Coding
TC1400000035.mm.1	5.63	5.64	-1	0.1245	0.5229	Gm10410	predicted gene 10410 [Source:MGI Symbol;Acc:MGI:3704422]	Multiple_Complex
TC0500001117.mm.1	3.35	3.41	-1.04	0.1822	0.5813	Gm10417	predicted gene 10417	Coding
TC1100003102.mm.1	4.74	4.7	1.03	0.504	0.8066	Gm10418	predicted gene 10418 [Source:MGI Symbol;Acc:MGI:3708553]	Multiple_Complex
TC0500001102.mm.1	6.5	6.62	-1.09	0.3102	0.6883	Gm10419	predicted gene 10419	Multiple_Complex
TC0500002785.mm.1	3.73	3.34	1.3	0.0439	0.4043	Gm10424	predicted gene 10424	Coding
TC1100000812.mm.1	3.66	3.69	-1.02	0.5036	0.8065	Gm10428	predicted gene 10428 [Source:MGI Symbol;Acc:MGI:3704375]	Coding
TC0500000421.mm.1	5.05	4.9	1.11	0.2019	0.6005	Gm1043	predicted gene 1043	Multiple_Complex
TC1100002846.mm.1	4.22	4.14	1.06	0.9513	0.9863	Gm10434	predicted gene 10434 [Source:MGI Symbol;Acc:MGI:3708552]	Multiple_Complex
[truncated: 4,780 more rows]
[truncated: 2 more columns]

## Sheet: miRNA
TC0900000467.mm.1	5.27	5.15	1.09	0.4848	0.7958	Mir100	microRNA 100	Multiple_Complex
[truncated: 129 more rows]

[truncated: 6 more sheets: unassigned, small RNA, Ribosomal, Pseudogene, Noncoding, precursor micro RNA]
