# Supplementary material for: Mouse Ataxin-2 Expansion Downregulates CamKII and other Calcium Signaling Factors, Impairing Granule – Purkinje Neuron Synaptic Strength
Source: Preprints.org preprint supplement (doi:10.20944/preprints202008.0470.v1), 2020-08-21
Supplement: Supplementary file 2 [file ArsovicAuburger_SuppTableS2_STRING_FunctionalEnrichmentAnalyses.xlsx]

## Sheet: Biological Process
#term ID	term description	observed gene count	background gene count	false discovery rate	matching proteins in your network (IDs)	matching proteins in your network (labels)
GO:0007215	glutamate receptor signaling pathway	4	45	0.0113	ENSMUSP00000046358,ENSMUSP00000075687,ENSMUSP00000099952,ENSMUSP00000112578	Camk2a,Dagla,Gria3,Grm4

## Sheet: KEGG
#term ID	term description	observed gene count	background gene count	false discovery rate	matching proteins in your network (IDs)	matching proteins in your network (labels)
mmu04728	Dopaminergic synapse	6	129	0.00012	ENSMUSP00000025912,ENSMUSP00000032192,ENSMUSP00000075687,ENSMUSP00000076697,ENSMUSP00000096775,ENSMUSP00000099952	Camk2a,Gria3,Itpr1,Kif5a,Plcb3,Scn1a
mmu04070	Phosphatidylinositol signaling system	5	96	0.00030	ENSMUSP00000025912,ENSMUSP00000026550,ENSMUSP00000028758,ENSMUSP00000031273,ENSMUSP00000032192	Cds1,Inpp5a,Itpka,Itpr1,Plcb3
mmu04020	Calcium signaling pathway	5	180	0.0028	ENSMUSP00000021142,ENSMUSP00000025912,ENSMUSP00000028758,ENSMUSP00000032192,ENSMUSP00000099952	Atp2a3,Camk2a,Itpka,Itpr1,Plcb3
mmu04713	Circadian entrainment	4	95	0.0028	ENSMUSP00000025912,ENSMUSP00000032192,ENSMUSP00000075687,ENSMUSP00000099952	Camk2a,Gria3,Itpr1,Plcb3
mmu04912	GnRH signaling pathway	4	87	0.0028	ENSMUSP00000025912,ENSMUSP00000032192,ENSMUSP00000099952,ENSMUSP00000107830	Camk2a,Itpr1,Plcb3,Prkcd
mmu04925	Aldosterone synthesis and secretion	4	97	0.0028	ENSMUSP00000025912,ENSMUSP00000032192,ENSMUSP00000046358,ENSMUSP00000099952	Camk2a,Dagla,Itpr1,Plcb3
mmu04724	Glutamatergic synapse	4	113	0.0032	ENSMUSP00000025912,ENSMUSP00000032192,ENSMUSP00000075687,ENSMUSP00000112578	Gria3,Grm4,Itpr1,Plcb3
mmu04750	Inflammatory mediator regulation of TRP channels	4	119	0.0034	ENSMUSP00000025912,ENSMUSP00000032192,ENSMUSP00000099952,ENSMUSP00000107830	Camk2a,Itpr1,Plcb3,Prkcd
mmu04720	Long-term potentiation	3	64	0.0061	ENSMUSP00000025912,ENSMUSP00000032192,ENSMUSP00000099952	Camk2a,Itpr1,Plcb3
mmu04723	Retrograde endocannabinoid signaling	4	145	0.0061	ENSMUSP00000025912,ENSMUSP00000032192,ENSMUSP00000046358,ENSMUSP00000075687	Dagla,Gria3,Itpr1,Plcb3
mmu04730	Long-term depression	3	60	0.0061	ENSMUSP00000025912,ENSMUSP00000032192,ENSMUSP00000075687	Gria3,Itpr1,Plcb3
mmu00562	Inositol phosphate metabolism	3	72	0.0074	ENSMUSP00000025912,ENSMUSP00000026550,ENSMUSP00000028758	Inpp5a,Itpka,Plcb3
mmu04022	cGMP-PKG signaling pathway	4	164	0.0074	ENSMUSP00000021142,ENSMUSP00000025912,ENSMUSP00000032192,ENSMUSP00000069011	Atp2a3,Itpr1,Pde5a,Plcb3
mmu04971	Gastric acid secretion	3	72	0.0074	ENSMUSP00000025912,ENSMUSP00000032192,ENSMUSP00000099952	Camk2a,Itpr1,Plcb3
mmu04916	Melanogenesis	3	98	0.0143	ENSMUSP00000025912,ENSMUSP00000099952,ENSMUSP00000100920	Camk2a,Kitl,Plcb3
mmu04922	Glucagon signaling pathway	3	99	0.0143	ENSMUSP00000025912,ENSMUSP00000032192,ENSMUSP00000099952	Camk2a,Itpr1,Plcb3
mmu04972	Pancreatic secretion	3	101	0.0143	ENSMUSP00000021142,ENSMUSP00000025912,ENSMUSP00000032192	Atp2a3,Itpr1,Plcb3
mmu04725	Cholinergic synapse	3	112	0.0173	ENSMUSP00000025912,ENSMUSP00000032192,ENSMUSP00000099952	Camk2a,Itpr1,Plcb3
mmu04270	Vascular smooth muscle contraction	3	125	0.0221	ENSMUSP00000025912,ENSMUSP00000032192,ENSMUSP00000107830	Itpr1,Plcb3,Prkcd
mmu04915	Estrogen signaling pathway	3	131	0.0238	ENSMUSP00000025912,ENSMUSP00000032192,ENSMUSP00000107830	Itpr1,Plcb3,Prkcd
mmu04261	Adrenergic signaling in cardiomyocytes	3	140	0.0272	ENSMUSP00000025912,ENSMUSP00000062507,ENSMUSP00000099952	Camk2a,Plcb3,Scn4b
mmu04072	Phospholipase D signaling pathway	3	145	0.0285	ENSMUSP00000025912,ENSMUSP00000100920,ENSMUSP00000112578	Grm4,Kitl,Plcb3
mmu04921	Oxytocin signaling pathway	3	149	0.0294	ENSMUSP00000025912,ENSMUSP00000032192,ENSMUSP00000099952	Camk2a,Itpr1,Plcb3
mmu04934	Cushing's syndrome	3	156	0.0318	ENSMUSP00000025912,ENSMUSP00000032192,ENSMUSP00000099952	Camk2a,Itpr1,Plcb3
mmu04621	NOD-like receptor signaling pathway	3	164	0.0349	ENSMUSP00000025912,ENSMUSP00000032192,ENSMUSP00000107830	Itpr1,Plcb3,Prkcd
mmu05010	Alzheimer's disease	3	167	0.0353	ENSMUSP00000021142,ENSMUSP00000025912,ENSMUSP00000032192	Atp2a3,Itpr1,Plcb3
mmu04360	Axon guidance	3	174	0.0379	ENSMUSP00000029271,ENSMUSP00000042211,ENSMUSP00000099952	Camk2a,Sema7a,Trpc3
mmu04927	Cortisol synthesis and secretion	2	66	0.0440	ENSMUSP00000025912,ENSMUSP00000032192	Itpr1,Plcb3
mmu05016	Huntington's disease	3	187	0.0440	ENSMUSP00000025912,ENSMUSP00000032192,ENSMUSP00000081867	Dnah11,Itpr1,Plcb3
mmu05031	Amphetamine addiction	2	65	0.0440	ENSMUSP00000075687,ENSMUSP00000099952	Camk2a,Gria3
mmu04924	Renin secretion	2	69	0.0444	ENSMUSP00000025912,ENSMUSP00000032192	Itpr1,Plcb3
mmu04918	Thyroid hormone synthesis	2	73	0.0477	ENSMUSP00000025912,ENSMUSP00000032192	Itpr1,Plcb3
mmu04970	Salivary secretion	2	75	0.0486	ENSMUSP00000025912,ENSMUSP00000032192	Itpr1,Plcb3

## Sheet: Reactome
#term ID	term description	observed gene count	background gene count	false discovery rate	matching proteins in your network (IDs)	matching proteins in your network (labels)
MMU-5576891	Cardiac conduction	6	113	0.00010	ENSMUSP00000021142,ENSMUSP00000032192,ENSMUSP00000062507,ENSMUSP00000069063,ENSMUSP00000076697,ENSMUSP00000099952	Atp2a3,Camk2a,Itpr1,Kcnip1,Scn1a,Scn4b
MMU-114508	Effects of PIP2 hydrolysis	3	24	0.0025	ENSMUSP00000032192,ENSMUSP00000046358,ENSMUSP00000107830	Dagla,Itpr1,Prkcd
MMU-5576892	Phase 0 - rapid depolarisation	3	36	0.0058	ENSMUSP00000062507,ENSMUSP00000076697,ENSMUSP00000099952	Camk2a,Scn1a,Scn4b
MMU-1483249	Inositol phosphate metabolism	3	42	0.0072	ENSMUSP00000025912,ENSMUSP00000026550,ENSMUSP00000028758	Inpp5a,Itpka,Plcb3
MMU-5578775	Ion homeostasis	3	49	0.0092	ENSMUSP00000021142,ENSMUSP00000032192,ENSMUSP00000099952	Atp2a3,Camk2a,Itpr1
MMU-418457	cGMP effects	2	10	0.0102	ENSMUSP00000032192,ENSMUSP00000069011	Itpr1,Pde5a
MMU-877300	Interferon gamma signaling	2	14	0.0143	ENSMUSP00000099952,ENSMUSP00000107830	Camk2a,Prkcd
MMU-418346	Platelet homeostasis	3	75	0.0181	ENSMUSP00000021142,ENSMUSP00000032192,ENSMUSP00000069011	Atp2a3,Itpr1,Pde5a
MMU-438066	Unblocking of NMDA receptors, glutamate binding and activation	2	17	0.0181	ENSMUSP00000075687,ENSMUSP00000099952	Camk2a,Gria3
MMU-109582	Hemostasis	6	489	0.0209	ENSMUSP00000021142,ENSMUSP00000032192,ENSMUSP00000046358,ENSMUSP00000069011,ENSMUSP00000096775,ENSMUSP00000107830	Atp2a3,Dagla,Itpr1,Kif5a,Pde5a,Prkcd
MMU-112315	Transmission across Chemical Synapses	4	187	0.0209	ENSMUSP00000025912,ENSMUSP00000028123,ENSMUSP00000075687,ENSMUSP00000099952	Camk2a,Gad2,Gria3,Plcb3
MMU-416476	G alpha (q) signalling events	4	188	0.0209	ENSMUSP00000025912,ENSMUSP00000032192,ENSMUSP00000046358,ENSMUSP00000107830	Dagla,Itpr1,Plcb3,Prkcd
MMU-418360	Platelet calcium homeostasis	2	22	0.0209	ENSMUSP00000021142,ENSMUSP00000032192	Atp2a3,Itpr1
MMU-1855204	Synthesis of IP3 and IP4 in the cytosol	2	25	0.0231	ENSMUSP00000025912,ENSMUSP00000028758	Itpka,Plcb3
MMU-399719	Trafficking of AMPA receptors	2	25	0.0231	ENSMUSP00000075687,ENSMUSP00000099952	Camk2a,Gria3
MMU-112043	PLC beta mediated events	2	32	0.0307	ENSMUSP00000025912,ENSMUSP00000107830	Plcb3,Prkcd
MMU-194840	Rho GTPase cycle	3	121	0.0309	ENSMUSP00000063284,ENSMUSP00000095200,ENSMUSP00000107655	Arhgap26,Arhgef33,Chn1
MMU-112314	Neurotransmitter receptors and postsynaptic signal transmission	3	126	0.0330	ENSMUSP00000025912,ENSMUSP00000075687,ENSMUSP00000099952	Camk2a,Gria3,Plcb3
MMU-4086398	Ca2+ pathway	2	41	0.0386	ENSMUSP00000025912,ENSMUSP00000099952	Camk2a,Plcb3

## Sheet: Uniprot Keywords
#term ID	term description	observed gene count	background gene count	false discovery rate	matching proteins in your network (IDs)	matching proteins in your network (labels)
KW-0025	Alternative splicing	24	4732	0.0304	ENSMUSP00000002549,ENSMUSP00000021142,ENSMUSP00000032192,ENSMUSP00000035027,ENSMUSP00000036477,ENSMUSP00000038130,ENSMUSP00000041431,ENSMUSP00000045121,ENSMUSP00000056353,ENSMUSP00000063284,ENSMUSP00000064511,ENSMUSP00000064758,ENSMUSP00000069063,ENSMUSP00000075687,ENSMUSP00000076697,ENSMUSP00000083944,ENSMUSP00000086589,ENSMUSP00000099952,ENSMUSP00000100920,ENSMUSP00000103191,ENSMUSP00000105563,…	Abhd3,Arhgef33,Atl2,Atp2a3,Camk2a,Chn1,Clmn,Clstn2,Cntnap5b,Etl4,Gria3,Grm4,Itpr1,Kcnip1,Kitl,Lppr5,Plxdc1,Prkcd,Scn1a,Stap2,Strip2,Tmem255a,Tmtc1,Zdhhc14
KW-0343	GTPase activation	4	164	0.0304	ENSMUSP00000027748,ENSMUSP00000045715,ENSMUSP00000095200,ENSMUSP00000107655	Arhgap26,Chn1,Rgs16,Rgs8
KW-0406	Ion transport	7	609	0.0304	ENSMUSP00000021142,ENSMUSP00000029271,ENSMUSP00000032192,ENSMUSP00000062507,ENSMUSP00000069063,ENSMUSP00000075687,ENSMUSP00000076697	Atp2a3,Gria3,Itpr1,Kcnip1,Scn1a,Scn4b,Trpc3
KW-0407	Ion channel	6	335	0.0304	ENSMUSP00000029271,ENSMUSP00000032192,ENSMUSP00000062507,ENSMUSP00000069063,ENSMUSP00000075687,ENSMUSP00000076697	Gria3,Itpr1,Kcnip1,Scn1a,Scn4b,Trpc3
KW-0472	Membrane	34	8074	0.0304	ENSMUSP00000002549,ENSMUSP00000021142,ENSMUSP00000022867,ENSMUSP00000027748,ENSMUSP00000028123,ENSMUSP00000029271,ENSMUSP00000030584,ENSMUSP00000031273,ENSMUSP00000032192,ENSMUSP00000032500,ENSMUSP00000035027,ENSMUSP00000038130,ENSMUSP00000042211,ENSMUSP00000043390,ENSMUSP00000045121,ENSMUSP00000045715,ENSMUSP00000046358,ENSMUSP00000056353,ENSMUSP00000062507,ENSMUSP00000064511,ENSMUSP00000064758,…	Abhd3,Atl2,Atp2a3,Camk2a,Cds1,Clmn,Clstn2,Cntnap5b,Dagla,Gad2,Gria3,Grm4,Icmt,Itpr1,Kcnip1,Kctd12,Kitl,Laptm4b,Lppr5,Plxdc1,Prkcd,Prmt8,Rgs16,Rgs8,Rnf19b,Scn1a,Scn4b,Sema7a,Stap2,Tmem200b,Tmem255a,Tmtc1,Trpc3,Zdhhc14
KW-0564	Palmitate	5	326	0.0304	ENSMUSP00000027748,ENSMUSP00000028123,ENSMUSP00000032192,ENSMUSP00000075687,ENSMUSP00000086589	Gad2,Gria3,Itpr1,Rgs16,Zdhhc14
KW-0597	Phosphoprotein	32	7545	0.0304	ENSMUSP00000021142,ENSMUSP00000025912,ENSMUSP00000027377,ENSMUSP00000027748,ENSMUSP00000028123,ENSMUSP00000028758,ENSMUSP00000031273,ENSMUSP00000032192,ENSMUSP00000034766,ENSMUSP00000036477,ENSMUSP00000038130,ENSMUSP00000041347,ENSMUSP00000041431,ENSMUSP00000045715,ENSMUSP00000046358,ENSMUSP00000063511,ENSMUSP00000064758,ENSMUSP00000069011,ENSMUSP00000075687,ENSMUSP00000075690,ENSMUSP00000076697,…	Atl2,Atp2a3,Camk2a,Car8,Cds1,Cep76,Chn1,Clmn,Dagla,Etl4,Gad2,Gria3,Igfbp5,Ina,Itpka,Itpr1,Kctd12,Kif5a,Pcp4l1,Pde5a,Plcb3,Prkcd,Rgs16,Rgs8,Rora,Scn1a,Serpinb1a,Snrk,Stap2,Strip2,Trove2,Zdhhc14
KW-0109	Calcium transport	3	96	0.0337	ENSMUSP00000021142,ENSMUSP00000029271,ENSMUSP00000032192	Atp2a3,Itpr1,Trpc3
KW-0488	Methylation	8	922	0.0354	ENSMUSP00000028758,ENSMUSP00000031273,ENSMUSP00000032500,ENSMUSP00000034766,ENSMUSP00000042211,ENSMUSP00000063284,ENSMUSP00000064758,ENSMUSP00000112919	Arhgef33,Atl2,Cds1,Itpka,Prmt8,Rora,Sema7a,Snrk
KW-0894	Sodium channel	2	27	0.0354	ENSMUSP00000062507,ENSMUSP00000076697	Scn1a,Scn4b
KW-0449	Lipoprotein	7	790	0.0487	ENSMUSP00000027748,ENSMUSP00000028123,ENSMUSP00000032192,ENSMUSP00000032500,ENSMUSP00000042211,ENSMUSP00000075687,ENSMUSP00000086589	Gad2,Gria3,Itpr1,Prmt8,Rgs16,Sema7a,Zdhhc14

## Sheet: Molecular Function
#term ID	term description	observed gene count	background gene count	false discovery rate	matching proteins in your network (IDs)	matching proteins in your network (labels)
GO:0005261	cation channel activity	6	276	0.0274	ENSMUSP00000029271,ENSMUSP00000032192,ENSMUSP00000062507,ENSMUSP00000069063,ENSMUSP00000075687,ENSMUSP00000076697	Gria3,Itpr1,Kcnip1,Scn1a,Scn4b,Trpc3
GO:0022839	ion gated channel activity	6	284	0.0274	ENSMUSP00000029271,ENSMUSP00000032192,ENSMUSP00000062507,ENSMUSP00000069063,ENSMUSP00000075687,ENSMUSP00000076697	Gria3,Itpr1,Kcnip1,Scn1a,Scn4b,Trpc3
GO:0008276	protein methyltransferase activity	3	77	0.0320	ENSMUSP00000032500,ENSMUSP00000043390,ENSMUSP00000043492	Icmt,Prmt8,Setd7
GO:0022890	inorganic cation transmembrane transporter activity	7	524	0.0320	ENSMUSP00000021142,ENSMUSP00000029271,ENSMUSP00000032192,ENSMUSP00000062507,ENSMUSP00000069063,ENSMUSP00000075687,ENSMUSP00000076697	Atp2a3,Gria3,Itpr1,Kcnip1,Scn1a,Scn4b,Trpc3
GO:0046873	metal ion transmembrane transporter activity	6	403	0.0320	ENSMUSP00000021142,ENSMUSP00000029271,ENSMUSP00000032192,ENSMUSP00000062507,ENSMUSP00000069063,ENSMUSP00000076697	Atp2a3,Itpr1,Kcnip1,Scn1a,Scn4b,Trpc3
GO:0070679	inositol 1,4,5 trisphosphate binding	2	14	0.0320	ENSMUSP00000029271,ENSMUSP00000032192	Itpr1,Trpc3
GO:0005248	voltage-gated sodium channel activity	2	20	0.0339	ENSMUSP00000062507,ENSMUSP00000076697	Scn1a,Scn4b
GO:0005516	calmodulin binding	4	183	0.0339	ENSMUSP00000025912,ENSMUSP00000028758,ENSMUSP00000099952,ENSMUSP00000112578	Camk2a,Grm4,Itpka,Plcb3
GO:0004683	calmodulin-dependent protein kinase activity	2	25	0.0453	ENSMUSP00000028758,ENSMUSP00000099952	Camk2a,Itpka
GO:0008066	glutamate receptor activity	2	26	0.0453	ENSMUSP00000075687,ENSMUSP00000112578	Gria3,Grm4
GO:0098772	molecular function regulator	11	1573	0.0453	ENSMUSP00000027748,ENSMUSP00000032192,ENSMUSP00000045715,ENSMUSP00000062507,ENSMUSP00000063284,ENSMUSP00000069063,ENSMUSP00000075690,ENSMUSP00000095200,ENSMUSP00000100920,ENSMUSP00000107655,ENSMUSP00000107830	Arhgap26,Arhgef33,Chn1,Itpr1,Kcnip1,Kitl,Prkcd,Rgs16,Rgs8,Scn4b,Serpinb1a
GO:0005096	GTPase activator activity	4	224	0.0483	ENSMUSP00000027748,ENSMUSP00000045715,ENSMUSP00000095200,ENSMUSP00000107655	Arhgap26,Chn1,Rgs16,Rgs8
GO:0005515	protein binding	27	6454	0.0483	ENSMUSP00000022867,ENSMUSP00000025912,ENSMUSP00000027377,ENSMUSP00000028123,ENSMUSP00000028758,ENSMUSP00000030584,ENSMUSP00000032192,ENSMUSP00000032500,ENSMUSP00000034766,ENSMUSP00000041347,ENSMUSP00000042211,ENSMUSP00000043390,ENSMUSP00000043492,ENSMUSP00000045715,ENSMUSP00000062507,ENSMUSP00000063284,ENSMUSP00000064758,ENSMUSP00000069063,ENSMUSP00000075687,ENSMUSP00000096775,ENSMUSP00000099952,…	Arhgef33,Atl2,Camk2a,Chn1,Clmn,Gad2,Gria3,Grm4,Icmt,Igfbp5,Ina,Itpka,Itpr1,Kcnip1,Kctd12,Kif5a,Kitl,Laptm4b,Plcb3,Prkcd,Prmt8,Rgs8,Rnf19b,Rora,Scn4b,Sema7a,Setd7
