# Supplementary material for: Mouse Ataxin-2 Expansion Downregulates CamKII and other Calcium Signaling Factors, Impairing Granule – Purkinje Neuron Synaptic Strength
Source: Preprints.org preprint supplement (doi:10.20944/preprints202008.0470.v1), 2020-08-21
Supplement: Supplementary file 3 [file ArsovicAuburger_SuppTableS3_FoldChanges_pvalues.xlsx]

## Sheet: Figure2
		3 months KIN		14 months KIN		6 months KO
	Transcript Name	Fold Change	p value	Fold Change	p value	Fold Change	p value
	Itpr1	0.8685	0.0924	0.5407	0.0016	0.9953	0.8728
	Ryr1	0.7622	0.296	1.2716	0.0048	1.2202	0.0411
	Ryr3	1.464	0.0575	1.4572	0.881	1.0876	0.446
	Stim1	1.008	0,9209	0.667	0,0143	0.8763	0,1055
	Atp2a1	0.9868	0,9195	0.7826	0,2288	0.6864	0,0855
	Atp2a2	0.8304	0,0162	0.6224	0,0007	0.9891	0,8672
	Atp2a3	0.8222	0,0760	0.4399	0,0003	0.7289	0,0366
	Orai1	1.1037	0,4731	0.9242	0,3397	0.968	0,6217
	Trpc3	0.8113	0,0106	0.5267	0,002	0.746	0,0382
	Cacna1a	0.8732	0,1775	0.9363	0,2925	1.1885	0,0702
	Slc8a2	0.7799	0,1452	0.5981	0,0105	0.9745	0,7904
	Atp2b2	0.8576	0,0169	1.6198	0,0084	0.9474	0,3782
		RIPA				SDS
		3 months KIN		14 months KIN		3 months KIN		14 months KIN
	Transcript Name	Fold Change	p value	Fold Change	p value	Fold Change	p value	Fold Change	p value
	ITPR1	0.9988	0.9877	0.709	0.0349	0.36	0.003	0.302	0.0408
	ATP2A2	0.9045	0.4654	0.8407	0.0337	0.6178	0.0041	0.6269	0.007

## Sheet: Figure3
	WT	1h				6h					WT/KO	Control		1h				6h
	Ctrl. vs treatment	1uM		5uM		1uM		5uM			Relative fold changes			1uM		5uM		1uM		5uM			WT vs KIN	Cytosol		Organelle
		Fold Change	p value	Fold Change	p value	Fold Change	p value	Fold Change	p value			Fold Change	p value	Fold Change	p value	Fold Change	p value	Fold Change	p value	Fold Change	p value		Calcium conc. (mM)	Fold Change	p value	Fold Change	p value
	Atxn2	0.8548	0.3524	1.03998	0.9997	0.701	0.0024	0.686	0.0014		Bip	1.0627	>0,9999	1.06305	0.9938	1.41785	0.1125	1.34996	<0,0001	1.14416	0.0678			1.077	0.4868	0.946	0.538
	Bip	2.428	0.0143	2.701	0.0031	8.795	<0,0001	7.048	<0,0001		Chop	1.13817	>0,9999	1.14195	0.8715	1.07525	0.9856	1.45439	0.0353	1.35365	0.1981
	Chop	9.219	<0,0001	9.474	<0,0001	12.23	<0,0001	10.045	<0,0001		Xbp1u	1.142	0.3197	1.30806	0.3265	0.899732	0.9343	1.19437	0.9469	1.09728	0.9987		Cytosol vs Organelle	WT		KIN
	Xbp1u	0.4564	0.0001	0.5964	0.0032	0.2912	<0,0001	0.2539	<0,0001		Xbp1s	1.107	0.9994	0.8942	0.9058	0.722547	0.0929	0.745358	0.0376	0.818696	0.292		Calcium conc. (mM)	Fold Change	p value	Fold Change	p value
	Xbp1s	3.138	<0,0001	3.597	<0,0001	4.685	<0,0001	4.065	<0,0001															6.73863	<0,0001	5.91811	<0,0001
	KO	1h				6h
	Ctrl. vs treatment	1uM		5uM		1uM		5uM
		Fold Change	p value	Fold Change	p value	Fold Change	p value	Fold Change	p value
	Bip	2.343	0.0227	1.9638	0.1514	6.574	<0,0001	6.219	<0,0001
	Chop	8.195	<0,0001	8.932	<0,0001	8.53	<0,0001	7.539	<0,0001
	Xbp1u	0.4553	0.0001	0.395	<0,0001	0.2062	<0,0001	0.137	<0,0001
	Xbp1s	2.7	0.0001	2.493	0.0006	3.386	<0,0001	3.221	<0,0001

## Sheet: Figure4
		3 months KIN		14 months KIN		6 months KO
	Transcript Name	Fold Change	p value	Fold Change	p value	Fold Change	p value
	Gria3	0.8396	0.0322	0.5937	<0,0001	0.933	0.4774
	Grm1	0.8534	0.0164	0.8211	0.0259	0.9517	0.4727
	Grm4	0.8345	0.0309	0.7432	0.0045	10271	0.842
	Plcb3	0.8489	0.1063	0.5249	<0,0001	0.6903	0.0156
	Plcb4	0.9321	0.2992	0.7705	0.0377	0.8572	0.0005
	Plcg1	0.6322	0.0183	1.0152	0.8543	1.081	0.3557
	Inpp5a	0.7732	0.0026	0.5811	0.0021	0.7727	0.0002
	Itpka	0.772	0.0132	0.7115	0.0016	0.8206	0.0032
	Prkcd	0.711	0.064	0.7375	0.0242	0.8987	0.1885
	Pcp4	0.7546	0.0001	0.6403	0.009	0.9564	0.3763
	Camkk1	0.9304	0.2649	0.5872	0.0027	0.8094	0.0105
	Camkk2	0.7642	0.0212	0.5285	0.0064	0.8098	0.0807
	Camk2a	0.757	0.0481	0.5341	0.0062	0.7367	0.0025
	Camk2b	0.8704	0.0272	0.6484	0.0043	0.9447	0.3387
	Camk2d	0.9932	0.8887	1.0444	0.563	0.8921	0.0793
	Camk2g	1.0442	0.7284	0.7347	0.0009	0.6877	0.0309
	Camk4	0.4635	0.0134	0.6628	<0,0001	0.7983	0.0093
	Khdrbs1	1.0446	0.5422	0.7173	0.0107	0.8918	0.0336
	Khdrbs2	1.0797	0.3895	0.9473	0.6496	0.8654	0.0983
	Khdrbs3	1.1109	0.3279	0.7867	0.0173	0.7782	0.0097
		RIPA				SDS
		3 months KIN		14 months KIN		3 months KIN		14 months KIN
	Transcript Name	Fold Change	p value	Fold Change	p value	Fold Change	p value	Fold Change	p value
	GluA3	0.7378	0.0082	0.7212	0.0287	0.8861	0.6016	0.534	0.0025
	Camk2alpha	0.982	0.8142	0.5391	0.002	0.5721	0.0271	0.2746	0.0034
	CamKIV	0.8977	0.269	0.7694	0.0035	0.669	0.0176	0.616	0.0048
	Sam68	0.878	0.0889	1.0345	0.6366	0.8257	0.0424	1.5004	0.0017

## Sheet: Figure5
		Nrxn1	-		+
			Fold Change	p value	Fold Change	p value
		AS1	1.2075	0.0493
		AS2	0.8871	0.1693	1.3904	0.0394
		AS3	1.378	0.0442	1.1042	0.2903
		AS4	1.3274	0.0036	1.3655	0.0057
		AS5	1.2423	0.0206	1.1997	0.0383
		AS6	1.2253	0.042	1.2843	0.0415
			Fold Change	p value
		AS2 -/+	0.6402	0.0006
		AS3 -/+	1.248	0.0394
		AS4 -/+	0.9754	0.6302
		AS5 -/+	1.036	0.1848
		AS6 -/+	0.9539	0.5659

## Sheet: Figure6
		9 months WT vs. KIN
		Fold Change	p value
	Spine Length	0.9	0.000171
	No. of spines	0.7	0.00112

## Sheet: Figure7
		3 months KIN		14 months KIN		6 months KO
	Transcript Name	Fold Change	p value	Fold Change	p value	Fold Change	p value
	Cbln1	0.9417	0.5169	0.9996	0.9956	0.9802	0.8375
	Cbln2	0.8567	0.566	0.2852	0.0216	1.116	0.5814
	Cbln3	0.8268	0.1403	0.7983	0.0066	0.8485	0.0895
	Cbln4	0.6713	0.0395	0.3288	0.0026	0.7663	0.1403
	Grid2	0.7545	0.03	0.5854	0.002	1.0115	0.8192
	Nlgn1	1.0563	0.7277	1.0075	0.9242	0.9234	0.1326
	Nlgn2	0.737	0.0921	0.5986	0.0055	0.9058	0.3106
	Nlgn3	0.7867	0.1506	0.8372	0.1041	1.005	0.9481
	Adam22	0.0602	0.7015	1.0405	0.5521	1.1624	0.1762
	Adam23	0.7385	0.0228	0.6696	<0,0001	0.8529	0.1097
	Lgi1	0.8372	0.0313	1.0811	0.2862	1.0857	0.4045
	Lgi3	1.0131	0.8648	1.0996	0.1391	0.9255	0.3328
	Grin1	0.9956	0.9718	0.8232	0.0005	1.0301	0.8306
	Dlg4	0.9922	0.9275	1.006	0.9653	0.9954	0.9518
	Shank1	0.8547	0.181	0.721	0.0014	0.905	0.2287
	Shank2	0.7325	0.0731	0.6679	0.0002	0.838	0.0104

## Sheet: Sup.Fig.1
		14 months KIN
	Transcript Name	Fold Change	p value
	Mcu	0.8924	0.0173
	Micu1	0.8696	0.0697
	Micu2	0.959	0.7077
	Micu3	0.768	0.0159
	Smdt1	0.9101	0.2621
	Vdac1	0.8715	0.1001
	Grp75	1.089	0.2422
	Mfn1	1.036	0.46
	Mfn2	0.9209	0.2137
	Sigmar1	0.8572	0.0325
	Perk	0.9484	0.5942
	Ire	0.8609	0.0354
	Atf6	0.7933	0.0147
	Bip	0.8701	0.145
	Xbp1u	0.982	0.7409
	Xbp1s	1.077	0.3676
	Chop	1.157	0.0281
	Atf4	1.209	0.0724

## Sheet: Sup.Fig.3
		16 weeks Q-58 Tg		46 weeks Q-58 Tg
	Transcript Name	Fold Change	p value	Fold Change	p value
	Itpr1	0.4598	0.0818	1.0284	0.7642
	Ryr1	1.0639	0.2639	1.0176	0.8591
	Inpp5a	0.8864	0.227	0.827	0.1071
	Camk2a	0.8426	0.0773	0.9025	0.3981
	Camk4	1.0646	0.4833	0.9537	0.4495
	Khdrbs1	0.848	0.1362	0.9263	0.3769
	Nrxn1	1.0441	0.5392	0.9344	0.3696
	Nrxn2	0.966	0.4617	0.9418	0.4984
	Nrxn3	0.9844	0.7488	0.9604	0.6344
	Nrxn1 AS4-	1.082	0.217	0.9331	0.5289
	Nrxn1 AS4+	1.067	0.209	0.9827	0.8532
	Grid2	1.0704	0.2399	0.9932	0.9131
	Nlgn2	1.251	0.001	1.0048	0.9519
	Adam22	1.1029	0.0656	1.0352	0.6595
	Adam23	0.9199	0.3367	1.0011	0.9692
		3 months KIN		6 months KO
	Transcript Name	Fold Change	p value	Fold Change	p value
	Nrxn1 total	1.1343	0.0613	1.1343	0.0613
	AS4-	1.1111	0.3705	0.9911	0.9131
	AS4+	1.0778	0.4592	0.8855	0.1259
